# Supplementary material
Source: Research Square preprint supplement (doi:10.21203/rs.3.rs-9913008/v1)
Supplement: Supplementary file 1 [file d8bff51aa8154136841728d0.xlsx]

## Sheet: Sheet1
Band Structure
k-points	Energy	k-points	Energy		k-points	Energy	k-points	Energy		k-points	Energy	k-points	Energy		k-points	Energy	k-points	Energy		k-points	Energy	k-points	Energy
	eV		eV			eV		eV			eV		eV			eV		eV			eV		eV
	α-SnTe Monolayer at P=0GPa		α-SnTe Bilayer at P=0GPa			β-SnTe Monolayer at P=0GPa		β-SnTe Bilayer at P=0GPa			γ-SnTe Monolayer at P=0GPa		γ-SnTe Bilayer at P=0GPa			Hexa-SnTe Monolayer at P=0GPa		Hexa-SnTe Bilayer at P=0GPa			π-SnTe Monolayer at P=0GPa		π-SnTe Bilayer at P=0GPa
0	-21.17	0	-21.709		0	-21.5653	0	-21.556		0	-21.4469	0	-21.3502		0	-11.9205	0	-12.1223		0	-11.9307	0	-12.4803
0.04312	-21.1698	0.04423	-21.7087		0.04098	-21.5651	0.04073	-21.5558		0.04117	-21.4466	0.04211	-21.3501		0.05463	-11.8938	0.05464	-12.0947		0.04098	-11.9115	0.04098	-12.4595
0.08624	-21.1693	0.08846	-21.7082		0.08195	-21.5643	0.08147	-21.5553		0.08235	-21.4458	0.08423	-21.3496		0.10926	-11.8143	0.10929	-12.0126		0.08196	-11.8544	0.08195	-12.3979
0.12936	-21.1684	0.13269	-21.7073		0.12293	-21.5631	0.1222	-21.5543		0.12352	-21.4446	0.12634	-21.3488		0.1639	-11.6845	0.16393	-11.8785		0.12294	-11.7618	0.12293	-12.2973
0.17972	-21.168	0.18222	-21.707		0.1639	-21.5616	0.16293	-21.5533		0.1647	-21.4431	0.16845	-21.3477		0.21857	-11.6601	0.21856	-11.853		0.16392	-11.64	0.1639	-12.1619
0.23009	-21.1668	0.23176	-21.7063		0.20488	-21.5615	0.20419	-21.5531		0.20544	-21.443	0.22124	-21.3475		0.27324	-11.5874	0.27318	-11.7775		0.2049	-11.6229	0.20488	-12.1433
0.28045	-21.165	0.28129	-21.7051		0.24586	-21.5612	0.24546	-21.5526		0.24617	-21.4427	0.27403	-21.347		0.32791	-11.4698	0.32781	-11.6554		0.24588	-11.5725	0.24585	-12.0881
0.33082	-21.1629	0.33083	-21.7039		0.28683	-21.5609	0.28672	-21.5519		0.28691	-21.4424	0.32682	-21.3463		0.38582	-11.6587	0.38575	-11.8514		0.28686	-11.4918	0.28683	-11.9988
0.3787	-21.1651	0.37852	-21.7055		0.32781	-21.5607	0.32798	-21.551		0.32765	-21.4421	0.37306	-21.3474		0.44373	-11.8018	0.4437	-11.9995		0.32784	-11.4004	0.3278	-11.8924
0.42658	-21.1671	0.42621	-21.7069		0.37417	-21.5614	0.37437	-21.5523		0.37398	-21.443	0.4193	-21.3486		0.50164	-11.8905	0.50164	-12.0913		0.37419	-11.5631	0.37416	-12.0794
0.47447	-21.1687	0.47391	-21.708		0.42053	-21.5627	0.42077	-21.5537		0.42032	-21.4444	0.46554	-21.3495		0.55955	-11.9205	0.55959	-12.1223		0.42053	-11.7168	0.42052	-12.2484
0.52235	-21.1697	0.5216	-21.7087		0.46688	-21.564	0.46716	-21.5549		0.46666	-21.4457	0.51178	-21.3501		0.61098	-11.8969	0.61105	-12.0978		0.46688	-11.8335	0.46688	-12.3753
0.57023	-21.17	0.56929	-21.709		0.51324	-21.565	0.51355	-21.5557		0.51299	-21.4466	0.55802	-21.3502		0.6624	-11.8266	0.6625	-12.0252		0.51323	-11.9061	0.51324	-12.4537
0.62338	-21.1696	0.62223	-21.7086		0.5596	-21.5653	0.55994	-21.556		0.55933	-21.4469	0.60935	-21.35		0.71382	-11.7124	0.71396	-11.907		0.55958	-11.9307	0.5596	-12.4803
0.67654	-21.1684	0.67517	-21.7078		0.61106	-21.5649	0.61144	-21.5557		0.61076	-21.4465	0.66068	-21.3493		0.77496	-11.7305	0.77501	-11.9258		0.61103	-11.9004	0.61106	-12.4476
0.72969	-21.1665	0.72811	-21.7064		0.66252	-21.5638	0.66293	-21.5547		0.6622	-21.4454	0.71201	-21.3482		0.8361	-11.6845	0.83607	-11.8785		0.66247	-11.8114	0.66252	-12.3514
0.77667	-21.1677	0.77451	-21.7071		0.71398	-21.5622	0.71443	-21.5533		0.71363	-21.4439	0.75185	-21.3483		0.89074	-11.8143	0.89071	-12.0126		0.71392	-11.6697	0.71398	-12.1968
0.82366	-21.1684	0.82091	-21.7074		0.75468	-21.5624	0.75531	-21.5536		0.75419	-21.444	0.7917	-21.3481		0.94537	-11.8938	0.94536	-12.0947		0.75464	-11.6936	0.75469	-12.2229
0.87064	-21.1684	0.86731	-21.7073		0.79539	-21.5622	0.79619	-21.5536		0.79475	-21.4437	0.83155	-21.3477		1	-11.9205	1	-12.1223		0.79536	-11.6828	0.79539	-12.2109
0.91376	-21.1693	0.91154	-21.7082		0.8361	-21.5616	0.83707	-21.5533		0.8353	-21.4431	0.87366	-21.3488		0	--	0	--		0.83608	-11.64	0.8361	-12.1619
0.95688	-21.1698	0.95577	-21.7087		0.87707	-21.5631	0.8778	-21.5543		0.87648	-21.4446	0.91577	-21.3496		0	-11.056	0	-11.6135		0.87706	-11.7618	0.87707	-12.2973
1	-21.17	1	-21.709		0.91805	-21.5643	0.91853	-21.5553		0.91765	-21.4458	0.95789	-21.3501		0.05463	-11.2949	0.05464	-11.5873		0.91804	-11.8544	0.91805	-12.3979
0	--	0	--		0.95902	-21.5651	0.95927	-21.5558		0.95883	-21.4466	1	-21.3502		0.10926	-11.5089	0.10929	-11.6968		0.95902	-11.9115	0.95902	-12.4595
0	-21.1647	0	-21.7089		1	-21.5653	1	-21.556		1	-21.4469	0	--		0.1639	-11.6845	0.16393	-11.8785		1	-11.9307	1	-12.4803
0.04312	-21.166	0.04423	-21.7087		0	--	0	--		0	--	0	-21.3497		0.21857	-11.6593	0.21856	-11.853		0	--	0	--
0.08624	-21.1673	0.08846	-21.7081		0	-21.564	0	-21.556		0	-21.4443	0.04211	-21.3494		0.27324	-11.5859	0.27318	-11.7774		0	-11.0339	0	-11.8859
0.12936	-21.1684	0.13269	-21.7073		0.04098	-21.5638	0.04073	-21.5556		0.04117	-21.4441	0.08423	-21.3485		0.32791	-11.4698	0.32781	-11.6554		0.04098	-11.1621	0.04098	-11.8688
0.17972	-21.168	0.18222	-21.707		0.08195	-21.5632	0.08147	-21.5549		0.08235	-21.4435	0.12634	-21.3474		0.38582	-11.4396	0.38575	-11.6264		0.08196	-11.3257	0.08195	-11.8184
0.23009	-21.1668	0.23176	-21.7062		0.12293	-21.5622	0.1222	-21.5538		0.12352	-21.4426	0.16845	-21.3477		0.44373	-11.3573	0.4437	-11.541		0.12294	-11.4891	0.12293	-11.9951
0.28045	-21.165	0.28129	-21.7051		0.1639	-21.5616	0.16293	-21.5532		0.1647	-21.4431	0.22124	-21.3475		0.50164	-11.2254	0.50164	-11.5841		0.16392	-11.6356	0.1639	-12.1605
0.33082	-21.1629	0.33083	-21.7039		0.20488	-21.5615	0.20419	-21.5531		0.20544	-21.443	0.27403	-21.3469		0.55955	-11.056	0.55959	-11.6135		0.2049	-11.6185	0.20488	-12.1419
0.3787	-21.164	0.37852	-21.7053		0.24586	-21.5612	0.24546	-21.5526		0.24617	-21.4427	0.32682	-21.3462		0.61098	-11.2079	0.61105	-11.5903		0.24588	-11.5683	0.24585	-12.0868
0.42658	-21.1648	0.42621	-21.7067		0.28683	-21.5609	0.28672	-21.5519		0.28691	-21.4424	0.37306	-21.3464		0.6624	-11.3318	0.6625	-11.5216		0.28686	-11.4879	0.28683	-11.9976
0.47447	-21.1652	0.47391	-21.7079		0.32781	-21.5607	0.32798	-21.551		0.32765	-21.4421	0.4193	-21.3473		0.71382	-11.4178	0.71396	-11.6039		0.32784	-11.3993	0.3278	-11.8922
0.52235	-21.1652	0.5216	-21.7086		0.37417	-21.561	0.37437	-21.5519		0.37398	-21.442	0.46554	-21.3485		0.77496	-11.5776	0.77501	-11.7684		0.37419	-11.3803	0.37416	-11.8704
0.57023	-21.1647	0.56929	-21.7089		0.42053	-21.5619	0.42077	-21.5534		0.42032	-21.4426	0.51178	-21.3494		0.8361	-11.6845	0.83607	-11.8785		0.42053	-11.3253	0.42052	-11.8057
0.62338	-21.1653	0.62223	-21.7085		0.46688	-21.563	0.46716	-21.5547		0.46666	-21.4434	0.55802	-21.3497		0.89074	-11.5089	0.89071	-11.6968		0.46688	-11.2403	0.46688	-11.7997
0.67654	-21.1652	0.67517	-21.7077		0.51324	-21.5637	0.51355	-21.5556		0.51299	-21.4441	0.60935	-21.3493		0.94537	-11.2949	0.94536	-11.5873		0.51323	-11.1352	0.51324	-11.864
0.72969	-21.1645	0.72811	-21.7063		0.5596	-21.564	0.55994	-21.556		0.55933	-21.4443	0.66068	-21.3483		1	-11.056	1	-11.6135		0.55958	-11.0339	0.5596	-11.8859
0.77667	-21.1664	0.77451	-21.707		0.61106	-21.5637	0.61144	-21.5555		0.61076	-21.444	0.71201	-21.3468		0	--	0	--		0.61103	-11.1473	0.61106	-11.8589
0.82366	-21.1677	0.82091	-21.7073		0.66252	-21.5628	0.66293	-21.5544		0.6622	-21.4432	0.75185	-21.3468		0	-11.0544	0	-11.2343		0.66247	-11.2611	0.66252	-11.7803
0.87064	-21.1684	0.86731	-21.7073		0.71398	-21.5616	0.71443	-21.5529		0.71363	-21.4424	0.7917	-21.3471		0.05463	-11.0406	0.05464	-11.4749		0.71392	-11.3472	0.71398	-11.8315
0.91376	-21.1673	0.91154	-21.7081		0.75468	-21.5617	0.75531	-21.5531		0.75419	-21.4424	0.83155	-21.3477		0.10926	-10.9971	0.10929	-11.5096		0.75464	-11.4566	0.75469	-11.96
0.95688	-21.166	0.95577	-21.7087		0.79539	-21.5615	0.79619	-21.553		0.79475	-21.4423	0.87366	-21.3474		0.1639	-10.9337	0.16393	-11.3832		0.79536	-11.5609	0.79539	-12.0763
1	-21.1647	1	-21.7089		0.8361	-21.5616	0.83707	-21.5532		0.8353	-21.4431	0.91577	-21.3485		0.21857	-11.1296	0.21856	-11.3593		0.83608	-11.6356	0.8361	-12.1605
0	--	0	--		0.87707	-21.5622	0.8778	-21.5538		0.87648	-21.4426	0.95789	-21.3494		0.27324	-11.3137	0.27318	-11.4933		0.87706	-11.4891	0.87707	-11.9951
0	-21.1647	0	-21.7038		0.91805	-21.5632	0.91853	-21.5549		0.91765	-21.4435	1	-21.3497		0.32791	-11.4675	0.32781	-11.6554		0.91804	-11.3257	0.91805	-11.8184
0.04312	-21.1635	0.04423	-21.7049		0.95902	-21.5638	0.95927	-21.5556		0.95883	-21.4441	0	--		0.38582	-11.4395	0.38575	-11.6262		0.95902	-11.1621	0.95902	-11.8688
0.08624	-21.1623	0.08846	-21.7062		1	-21.564	1	-21.556		1	-21.4443	0	-21.3477		0.44373	-11.3571	0.4437	-11.5405		1	-11.0339	1	-11.8859
0.12936	-21.1614	0.13269	-21.7072		0	--	0	--		0	--	0.04211	-21.3475		0.50164	-11.2252	0.50164	-11.4039		0	--	0	--
0.17972	-21.161	0.18222	-21.707		0	-21.5639	0	-21.5555		0	-21.4442	0.08423	-21.3469		0.55955	-11.0544	0.55959	-11.2343		0	-11.012	0	-11.8575
0.23009	-21.1599	0.23176	-21.7062		0.04098	-21.5637	0.04073	-21.5553		0.04117	-21.444	0.12634	-21.3465		0.61098	-11.2077	0.61105	-11.3857		0.04098	-11.0023	0.04098	-11.8406
0.28045	-21.1608	0.28129	-21.705		0.08195	-21.5631	0.08147	-21.5547		0.08235	-21.4434	0.16845	-21.3462		0.6624	-11.3316	0.6625	-11.5145		0.08196	-10.9733	0.08195	-11.8072
0.33082	-21.1629	0.33083	-21.7039		0.12293	-21.5621	0.1222	-21.5537		0.12352	-21.4425	0.22124	-21.346		0.71382	-11.4177	0.71396	-11.6036		0.12294	-10.9288	0.12293	-11.7386
0.3787	-21.1617	0.37852	-21.7042		0.1639	-21.5609	0.16293	-21.5527		0.1647	-21.4414	0.27403	-21.3454		0.77496	-11.1743	0.77501	-11.4278		0.16392	-10.8753	0.1639	-11.6426
0.42658	-21.1604	0.42621	-21.7045		0.20488	-21.5609	0.20419	-21.5525		0.20544	-21.4416	0.32682	-21.3462		0.8361	-10.9337	0.83607	-11.3832		0.2049	-10.9887	0.20488	-11.6277
0.47447	-21.1622	0.47391	-21.7045		0.24586	-21.5608	0.24546	-21.5519		0.24617	-21.4417	0.37306	-21.3459		0.89074	-10.9971	0.89071	-11.5096		0.24588	-11.1204	0.24585	-11.5843
0.52235	-21.1637	0.5216	-21.7042		0.28683	-21.5606	0.28672	-21.5512		0.28691	-21.4419	0.4193	-21.3464		0.94537	-11.0406	0.94536	-11.4749		0.28686	-11.2554	0.28683	-11.734
0.57023	-21.1647	0.56929	-21.7038		0.32781	-21.5607	0.32798	-21.551		0.32765	-21.4421	0.46554	-21.3469		1	-11.0544	1	-11.2343		0.32784	-11.3662	0.3278	-11.8643
0.62338	-21.1635	0.62223	-21.7043		0.37417	-21.5604	0.37437	-21.5515		0.37398	-21.4419	0.51178	-21.3475		0	--	0	--		0.37419	-11.343	0.37416	-11.8413
0.67654	-21.1618	0.67517	-21.7045		0.42053	-21.5616	0.42077	-21.5532		0.42032	-21.4419	0.55802	-21.3477		0	-11.0528	0	-11.2337		0.42053	-11.2897	0.42052	-11.7775
0.72969	-21.1608	0.72811	-21.7044		0.46688	-21.5629	0.46716	-21.5544		0.46666	-21.4432	0.60935	-21.3474		0.05463	-11.0351	0.05464	-11.218		0.46688	-11.2078	0.46688	-11.7724
0.77667	-21.1608	0.77451	-21.7057		0.51324	-21.5637	0.51355	-21.5552		0.51299	-21.444	0.66068	-21.3467		0.10926	-10.9914	0.10929	-11.2127		0.51323	-11.1075	0.51324	-11.8359
0.82366	-21.1613	0.82091	-21.7067		0.5596	-21.5639	0.55994	-21.5555		0.55933	-21.4442	0.71201	-21.3464		0.1639	-10.9337	0.16393	-11.3831		0.55958	-11.012	0.5596	-11.8575
0.87064	-21.1614	0.86731	-21.7072		0.61106	-21.5636	0.61144	-21.5552		0.61076	-21.4439	0.75185	-21.3464		0.21857	-11.126	0.21856	-11.3593		0.61103	-11.119	0.61106	-11.8309
0.91376	-21.1623	0.91154	-21.7062		0.66252	-21.5626	0.66293	-21.5542		0.6622	-21.4429	0.7917	-21.3466		0.27324	-11.3108	0.27318	-11.4932		0.66247	-11.2278	0.66252	-11.7533
0.95688	-21.1635	0.95577	-21.7049		0.71398	-21.5611	0.71443	-21.5527		0.71363	-21.4415	0.83155	-21.3462		0.32791	-11.4675	0.32781	-11.6553		0.71392	-11.3109	0.71398	-11.8029
1	-21.1647	1	-21.7038		0.75468	-21.5614	0.75531	-21.553		0.75419	-21.4417	0.87366	-21.3465		0.38582	-11.2512	0.38575	-11.4279		0.75464	-11.1604	0.75469	-11.6793
0	--	0	--		0.79539	-21.5613	0.79619	-21.5529		0.79475	-21.442	0.91577	-21.3469		0.44373	-11.0314	0.4437	-11.4974		0.79536	-11.004	0.79539	-11.6721
0	-21.1601	0	-21.7038		0.8361	-21.5609	0.83707	-21.5527		0.8353	-21.4414	0.95789	-21.3475		0.50164	-10.8585	0.50164	-11.4033		0.83608	-10.8753	0.8361	-11.6426
0.04312	-21.1602	0.04423	-21.7049		0.87707	-21.5621	0.8778	-21.5537		0.87648	-21.4425	1	-21.3477		0.55955	-11.0528	0.55959	-11.2337		0.87706	-10.9288	0.87707	-11.7386
0.08624	-21.1607	0.08846	-21.7062		0.91805	-21.5631	0.91853	-21.5547		0.91765	-21.4434	0	--		0.61098	-10.8808	0.61105	-11.3851		0.91804	-10.9733	0.91805	-11.8072
0.12936	-21.1613	0.13269	-21.7072		0.95902	-21.5637	0.95927	-21.5553		0.95883	-21.444	0	-21.3471		0.6624	-10.9865	0.6625	-11.514		0.95902	-11.0023	0.95902	-11.8406
0.17972	-21.1609	0.18222	-21.7069		1	-21.5639	1	-21.5555		1	-21.4442	0.04211	-21.3467		0.71382	-11.1755	0.71396	-11.4103		1	-11.012	1	-11.8575
0.23009	-21.1598	0.23176	-21.7062		0	--	0	--		0	--	0.08423	-21.3458		0.77496	-11.0763	0.77501	-11.3516		0	--	0	--
0.28045	-21.1608	0.28129	-21.705		0	-21.5556	0	-21.5555		0	-21.4377	0.12634	-21.3459		0.8361	-10.9337	0.83607	-11.3831		0	-11.0118	0	-11.438
0.33082	-21.1629	0.33083	-21.7039		0.04098	-21.5568	0.04073	-21.5551		0.04117	-21.4385	0.16845	-21.3461		0.89074	-10.9914	0.89071	-11.2127		0.04098	-11.0017	0.04098	-11.6099
0.3787	-21.1607	0.37852	-21.7041		0.08195	-21.5583	0.08147	-21.5543		0.08235	-21.4398	0.22124	-21.3459		0.94537	-11.0351	0.94536	-11.218		0.08196	-10.9724	0.08195	-11.7909
0.42658	-21.1604	0.42621	-21.7044		0.12293	-21.56	0.1222	-21.5532		0.12352	-21.4414	0.27403	-21.3454		1	-11.0528	1	-11.2337		0.12294	-10.9276	0.12293	-11.7124
0.47447	-21.1593	0.47391	-21.7045		0.1639	-21.5609	0.16293	-21.5527		0.1647	-21.4414	0.32682	-21.3461		0	--	0	--		0.16392	-10.8741	0.1639	-11.6297
0.52235	-21.1599	0.5216	-21.7042		0.20488	-21.5609	0.20419	-21.5525		0.20544	-21.4416	0.37306	-21.3458		0	-11.0505	0	-11.2144		0.2049	-10.9854	0.20488	-11.6149
0.57023	-21.1601	0.56929	-21.7038		0.24586	-21.5608	0.24546	-21.5518		0.24617	-21.4417	0.4193	-21.346		0.05463	-10.8107	0.05464	-11.1982		0.24588	-11.1164	0.24585	-11.5759
0.62338	-21.1598	0.62223	-21.7043		0.28683	-21.5606	0.28672	-21.5511		0.28691	-21.4419	0.46554	-21.3463		0.10926	-10.8651	0.10929	-11.1722		0.28686	-11.2506	0.28683	-11.7327
0.67654	-21.1593	0.67517	-21.7045		0.32781	-21.5607	0.32798	-21.551		0.32765	-21.4421	0.51178	-21.3468		0.1639	-10.9278	0.16393	-11.1053		0.32784	-11.3577	0.3278	-11.8617
0.72969	-21.1598	0.72811	-21.7043		0.37417	-21.5604	0.37437	-21.5511		0.37398	-21.4417	0.55802	-21.3471		0.21857	-10.7435	0.21856	-11.3017		0.37419	-11.1889	0.37416	-11.659
0.77667	-21.1597	0.77451	-21.7057		0.42053	-21.5596	0.42077	-21.5525		0.42032	-21.4413	0.60935	-21.3467		0.27324	-10.5832	0.27318	-11.289		0.42053	-11.0067	0.42052	-11.6983
0.82366	-21.1608	0.82091	-21.7067		0.46688	-21.5584	0.46716	-21.5541		0.46666	-21.4402	0.66068	-21.3463		0.32791	-10.4665	0.32781	-11.1758		0.46688	-10.8979	0.46688	-11.7037
0.87064	-21.1613	0.86731	-21.7072		0.51324	-21.5569	0.51355	-21.5551		0.51299	-21.4389	0.71201	-21.3456		0.38582	-10.5927	0.38575	-11.3581		0.51323	-10.9321	0.51324	-11.5734
0.91376	-21.1607	0.91154	-21.7062		0.5596	-21.5556	0.55994	-21.5555		0.55933	-21.4377	0.75185	-21.3456		0.44373	-10.6955	0.4437	-11.1982		0.55958	-11.0118	0.5596	-11.438
0.95688	-21.1602	0.95577	-21.7049		0.61106	-21.5571	0.61144	-21.555		0.61076	-21.439	0.7917	-21.3455		0.50164	-10.8582	0.50164	-11.0197		0.61103	-10.9292	0.61106	-11.5887
1	-21.1601	1	-21.7038		0.66252	-21.5587	0.66293	-21.5538		0.6622	-21.4405	0.83155	-21.3461		0.55955	-11.0505	0.55959	-11.2144		0.66247	-10.8881	0.66252	-11.7289
0	--	0	--		0.71398	-21.5599	0.71443	-21.5519		0.71363	-21.4414	0.87366	-21.3459		0.61098	-10.8804	0.61105	-11.0431		0.71392	-11.0645	0.71398	-11.6581
0	-21.1562	0	-21.7035		0.75468	-21.5602	0.75531	-21.5523		0.75419	-21.4416	0.91577	-21.3458		0.6624	-10.7137	0.6625	-11.1511		0.75464	-11.0076	0.75469	-11.654
0.04312	-21.1562	0.04423	-21.7024		0.79539	-21.5608	0.79619	-21.5526		0.79475	-21.4416	0.95789	-21.3467		0.71382	-10.6309	0.71396	-11.349		0.79536	-10.9411	0.79539	-11.6471
0.08624	-21.1561	0.08846	-21.7013		0.8361	-21.5609	0.83707	-21.5527		0.8353	-21.4414	1	-21.3471		0.77496	-10.7563	0.77501	-11.28		0.83608	-10.8741	0.8361	-11.6297
0.12936	-21.156	0.13269	-21.7004		0.87707	-21.56	0.8778	-21.5532		0.87648	-21.4414	0	--		0.8361	-10.9278	0.83607	-11.1053		0.87706	-10.9276	0.87707	-11.7124
0.17972	-21.1573	0.18222	-21.7004		0.91805	-21.5583	0.91853	-21.5543		0.91765	-21.4398	0	-21.3464		0.89074	-10.8651	0.89071	-11.1722		0.91804	-10.9724	0.91805	-11.7909
0.23009	-21.1589	0.23176	-21.7016		0.95902	-21.5568	0.95927	-21.5551		0.95883	-21.4385	0.04211	-21.3461		0.94537	-10.8107	0.94536	-11.1982		0.95902	-11.0017	0.95902	-11.6099
0.28045	-21.1583	0.28129	-21.7027		1	-21.5556	1	-21.5555		1	-21.4377	0.08423	-21.3457		1	-11.0505	1	-11.2144		1	-11.0118	1	-11.438
0.33082	-21.1568	0.33083	-21.7038		0	--	0	--		0	--	0.12634	-21.3452		0	--	0	--		0	--	0	--
0.3787	-21.1585	0.37852	-21.7035		0	-21.5556	0	-21.5503		0	-21.4377	0.16845	-21.3446		0	-10.7898	0	-11.2134		0	-10.992	0	-11.4169
0.42658	-21.1587	0.42621	-21.7031		0.04098	-21.5567	0.04073	-21.5506		0.04117	-21.4381	0.22124	-21.3447		0.05463	-10.8044	0.05464	-11.006		0.04098	-10.9343	0.04098	-11.4062
0.47447	-21.159	0.47391	-21.7025		0.08195	-21.5581	0.08147	-21.5512		0.08235	-21.4391	0.27403	-21.3453		0.10926	-10.8589	0.10929	-11.1526		0.08196	-10.9081	0.08195	-11.4145
0.52235	-21.1576	0.5216	-21.7027		0.12293	-21.5596	0.1222	-21.5522		0.12352	-21.4402	0.32682	-21.3446		0.1639	-10.9277	0.16393	-11.1053		0.12294	-10.8718	0.12293	-11.5223
0.57023	-21.1562	0.56929	-21.7035		0.1639	-21.5609	0.16293	-21.5524		0.1647	-21.4414	0.37306	-21.345		0.21857	-10.7391	0.21856	-11.3015		0.16392	-10.8732	0.1639	-11.6178
0.62338	-21.1577	0.62223	-21.7026		0.20488	-21.5607	0.20419	-21.5523		0.20544	-21.441	0.4193	-21.3454		0.27324	-10.5788	0.27318	-11.2889		0.2049	-10.8311	0.20488	-11.6031
0.67654	-21.1591	0.67517	-21.7026		0.24586	-21.5601	0.24546	-21.5518		0.24617	-21.4404	0.46554	-21.3459		0.32791	-10.4665	0.32781	-11.1758		0.24588	-10.8099	0.24585	-11.5749
0.72969	-21.1593	0.72811	-21.7032		0.28683	-21.5593	0.28672	-21.5509		0.28691	-21.4396	0.51178	-21.3462		0.38582	-10.5222	0.38575	-11.1485		0.28686	-10.7805	0.28683	-11.516
0.77667	-21.1589	0.77451	-21.7019		0.32781	-21.5583	0.32798	-21.5503		0.32765	-21.4387	0.55802	-21.3464		0.44373	-10.6678	0.4437	-11.0684		0.32784	-10.7554	0.3278	-11.4348
0.82366	-21.1572	0.82091	-21.7006		0.37417	-21.56	0.37437	-21.5507		0.37398	-21.4403	0.60935	-21.3462		0.50164	-10.8579	0.50164	-11.0189		0.37419	-10.7961	0.37416	-11.5691
0.87064	-21.156	0.86731	-21.7004		0.42053	-21.5596	0.42077	-21.551		0.42032	-21.4409	0.66068	-21.3456		0.55955	-10.7898	0.55959	-11.2134		0.42053	-10.8491	0.42052	-11.6725
0.91376	-21.1561	0.91154	-21.7013		0.46688	-21.5584	0.46716	-21.5508		0.46666	-21.4398	0.71201	-21.3456		0.61098	-10.844	0.61105	-11.0422		0.46688	-10.8554	0.46688	-11.677
0.95688	-21.1562	0.95577	-21.7024		0.51324	-21.5569	0.51355	-21.5505		0.51299	-21.4385	0.75185	-21.3454		0.6624	-10.7082	0.6625	-11.0436		0.51323	-10.9191	0.51324	-11.5491
1	-21.1562	1	-21.7035		0.5596	-21.5556	0.55994	-21.5503		0.55933	-21.4377	0.7917	-21.3451		0.71382	-10.5632	0.71396	-11.1273		0.55958	-10.992	0.5596	-11.4169
0	--	0	--		0.61106	-21.5571	0.61144	-21.5505		0.61076	-21.4387	0.83155	-21.3446		0.77496	-10.7294	0.77501	-11.2457		0.61103	-10.9091	0.61106	-11.5641
0	-21.1562	0	-21.7035		0.66252	-21.5587	0.66293	-21.5508		0.6622	-21.44	0.87366	-21.3452		0.8361	-10.9277	0.83607	-11.1053		0.66247	-10.8849	0.66252	-11.7018
0.04312	-21.1562	0.04423	-21.7024		0.71398	-21.5599	0.71443	-21.551		0.71363	-21.4413	0.91577	-21.3457		0.89074	-10.8589	0.89071	-11.1526		0.71392	-10.8315	0.71398	-11.6331
0.08624	-21.1561	0.08846	-21.7013		0.75468	-21.5599	0.75531	-21.5519		0.75419	-21.4411	0.95789	-21.3461		0.94537	-10.8044	0.94536	-11.006		0.75464	-10.8429	0.75469	-11.6221
0.12936	-21.156	0.13269	-21.7004		0.79539	-21.5604	0.79619	-21.5523		0.79475	-21.4411	1	-21.3464		1	-10.7898	1	-11.2134		0.79536	-10.8452	0.79539	-11.5743
0.17972	-21.1573	0.18222	-21.7004		0.8361	-21.5609	0.83707	-21.5524		0.8353	-21.4414	0	--		0	--	0	--		0.83608	-10.8732	0.8361	-11.6178
0.23009	-21.1589	0.23176	-21.7016		0.87707	-21.5596	0.8778	-21.5522		0.87648	-21.4402	0	-21.3461		0	-10.7834	0	-10.9528		0.87706	-10.8718	0.87707	-11.5223
0.28045	-21.1583	0.28129	-21.7027		0.91805	-21.5581	0.91853	-21.5512		0.91765	-21.4391	0.04211	-21.346		0.05463	-10.8009	0.05464	-10.975		0.91804	-10.9081	0.91805	-11.4145
0.33082	-21.1568	0.33083	-21.7038		0.95902	-21.5567	0.95927	-21.5506		0.95883	-21.4381	0.08423	-21.3454		0.10926	-10.5579	0.10929	-11.0326		0.95902	-10.9343	0.95902	-11.4062
0.3787	-21.1576	0.37852	-21.7033		1	-21.5556	1	-21.5503		1	-21.4377	0.12634	-21.3449		0.1639	-10.3477	0.16393	-11.0861		1	-10.992	1	-11.4169
0.42658	-21.1585	0.42621	-21.7028		0	--	0	--		0	--	0.16845	-21.3445		0.21857	-10.3588	0.21856	-10.897		0	--	0	--
0.47447	-21.1571	0.47391	-21.7022		0	-21.5556	0	-21.5498		0	-21.4377	0.22124	-21.3446		0.27324	-10.3948	0.27318	-11.0264		0	-10.9436	0	-11.4167
0.52235	-21.1561	0.5216	-21.7027		0.04098	-21.5566	0.04073	-21.55		0.04117	-21.438	0.27403	-21.3453		0.32791	-10.4627	0.32781	-11.1757		0.04098	-10.8989	0.04098	-11.4058
0.57023	-21.1562	0.56929	-21.7035		0.08195	-21.5581	0.08147	-21.5507		0.08235	-21.439	0.32682	-21.3445		0.38582	-10.522	0.38575	-11.1483		0.08196	-10.8353	0.08195	-11.3988
0.62338	-21.1562	0.62223	-21.7025		0.12293	-21.5595	0.1222	-21.5516		0.12352	-21.4402	0.37306	-21.3448		0.44373	-10.6675	0.4437	-11.068		0.12294	-10.8189	0.12293	-11.5016
0.67654	-21.1574	0.67517	-21.7024		0.1639	-21.5609	0.16293	-21.5524		0.1647	-21.4414	0.4193	-21.3449		0.50164	-10.761	0.50164	-11.0165		0.16392	-10.8714	0.1639	-11.606
0.72969	-21.1582	0.72811	-21.703		0.20488	-21.5607	0.20419	-21.5522		0.20544	-21.441	0.46554	-21.3453		0.55955	-10.7834	0.55959	-10.9528		0.2049	-10.827	0.20488	-11.5915
0.77667	-21.1581	0.77451	-21.7017		0.24586	-21.5601	0.24546	-21.5518		0.24617	-21.4404	0.51178	-21.3461		0.61098	-10.7657	0.61105	-11.0021		0.24588	-10.8061	0.24585	-11.5719
0.82366	-21.157	0.82091	-21.7005		0.28683	-21.5593	0.28672	-21.5508		0.28691	-21.4396	0.55802	-21.3461		0.6624	-10.7079	0.6625	-11.0432		0.28686	-10.7775	0.28683	-11.5051
0.87064	-21.156	0.86731	-21.7004		0.32781	-21.5583	0.32798	-21.5503		0.32765	-21.4387	0.60935	-21.346		0.71382	-10.5629	0.71396	-11.1271		0.32784	-10.755	0.3278	-11.4346
0.91376	-21.1561	0.91154	-21.7013		0.37417	-21.5582	0.37437	-21.5507		0.37398	-21.4386	0.66068	-21.3452		0.77496	-10.4532	0.77501	-10.9111		0.37419	-10.7627	0.37416	-11.5457
0.95688	-21.1562	0.95577	-21.7024		0.42053	-21.5578	0.42077	-21.5502		0.42032	-21.4384	0.71201	-21.3448		0.8361	-10.3477	0.83607	-11.0861		0.42053	-10.7873	0.42052	-11.4454
1	-21.1562	1	-21.7035		0.46688	-21.5572	0.46716	-21.5498		0.46666	-21.438	0.75185	-21.3448		0.89074	-10.5579	0.89071	-11.0326		0.46688	-10.8382	0.46688	-11.3549
0	--	0	--		0.51324	-21.5564	0.51355	-21.5497		0.51299	-21.4376	0.7917	-21.3449		0.94537	-10.8009	0.94536	-10.975		0.51323	-10.9068	0.51324	-11.3193
0	-21.1558	0	-21.7007		0.5596	-21.5556	0.55994	-21.5498		0.55933	-21.4377	0.83155	-21.3445		1	-10.7834	1	-10.9528		0.55958	-10.9436	0.5596	-11.4167
0.04312	-21.1558	0.04423	-21.7006		0.61106	-21.5565	0.61144	-21.5497		0.61076	-21.4377	0.87366	-21.3449		0	--	0	--		0.61103	-10.8976	0.61106	-11.3226
0.08624	-21.1559	0.08846	-21.7001		0.66252	-21.5574	0.66293	-21.5499		0.6622	-21.4381	0.91577	-21.3454		0	-10.0626	0	-10.9346		0.66247	-10.8239	0.66252	-11.3637
0.12936	-21.156	0.13269	-21.7004		0.71398	-21.558	0.71443	-21.5504		0.71363	-21.4385	0.95789	-21.346		0.05463	-10.0943	0.05464	-10.9592		0.71392	-10.7769	0.71398	-11.5139
0.17972	-21.1553	0.18222	-21.7002		0.75468	-21.5591	0.75531	-21.551		0.75419	-21.4394	1	-21.3461		0.10926	-10.1899	0.10929	-11.0139		0.75464	-10.7975	0.75469	-11.4925
0.23009	-21.1552	0.23176	-21.7014		0.79539	-21.5601	0.79619	-21.552		0.79475	-21.4405	0	--		0.1639	-10.3477	0.16393	-11.0861		0.79536	-10.8198	0.79539	-11.5518
0.28045	-21.1557	0.28129	-21.7025		0.8361	-21.5609	0.83707	-21.5524		0.8353	-21.4414	0	-21.3455		0.21857	-10.3573	0.21856	-10.8969		0.83608	-10.8714	0.8361	-11.606
0.33082	-21.1568	0.33083	-21.7037		0.87707	-21.5595	0.8778	-21.5516		0.87648	-21.4402	0.04211	-21.3453		0.27324	-10.392	0.27318	-11.0264		0.87706	-10.8189	0.87707	-11.5016
0.3787	-21.1562	0.37852	-21.7023		0.91805	-21.5581	0.91853	-21.5507		0.91765	-21.439	0.08423	-21.3449		0.32791	-10.4627	0.32781	-11.1757		0.91804	-10.8353	0.91805	-11.3988
0.42658	-21.156	0.42621	-21.7007		0.95902	-21.5566	0.95927	-21.55		0.95883	-21.438	0.12634	-21.3444		0.38582	-10.3215	0.38575	-10.9671		0.95902	-10.8989	0.95902	-11.4058
0.47447	-21.1558	0.47391	-21.7015		1	-21.5556	1	-21.5498		1	-21.4377	0.16845	-21.3444		0.44373	-10.1909	0.4437	-10.851		1	-10.9436	1	-11.4167
0.52235	-21.1558	0.5216	-21.7017		0	--	0	--		0	--	0.22124	-21.3444		0.50164	-10.097	0.50164	-10.9407		0	--	0	--
0.57023	-21.1558	0.56929	-21.7007		0	-21.5556	0	-21.5493		0	-21.4374	0.27403	-21.344		0.55955	-10.0626	0.55959	-10.9346		0	-10.7206	0	-11.3969
0.62338	-21.1558	0.62223	-21.7018		0.04098	-21.556	0.04073	-21.5493		0.04117	-21.4373	0.32682	-21.3445		0.61098	-10.0899	0.61105	-10.9239		0.04098	-10.733	0.04098	-11.3335
0.67654	-21.1559	0.67517	-21.7012		0.08195	-21.556	0.08147	-21.5497		0.08235	-21.4369	0.37306	-21.3447		0.6624	-10.1658	0.6625	-10.87		0.08196	-10.7675	0.08195	-11.3743
0.72969	-21.156	0.72811	-21.7012		0.12293	-21.5557	0.1222	-21.551		0.12352	-21.4364	0.4193	-21.3446		0.71382	-10.2752	0.71396	-10.8957		0.12294	-10.8172	0.12293	-11.3253
0.77667	-21.1554	0.77451	-21.7006		0.1639	-21.5553	0.16293	-21.5519		0.1647	-21.4357	0.46554	-21.3452		0.77496	-10.2763	0.77501	-10.8958		0.16392	-10.8388	0.1639	-11.2658
0.82366	-21.1554	0.82091	-21.7005		0.20488	-21.5555	0.20419	-21.5516		0.20544	-21.436	0.51178	-21.3455		0.8361	-10.3477	0.83607	-11.0861		0.2049	-10.7912	0.20488	-11.4148
0.87064	-21.156	0.86731	-21.7004		0.24586	-21.5563	0.24546	-21.5509		0.24617	-21.4367	0.55802	-21.3455		0.89074	-10.1899	0.89071	-11.0139		0.24588	-10.7456	0.24585	-11.5603
0.91376	-21.1559	0.91154	-21.7001		0.28683	-21.5573	0.28672	-21.5501		0.28691	-21.4377	0.60935	-21.3454		0.94537	-10.0943	0.94536	-10.9592		0.28686	-10.7356	0.28683	-11.4934
0.95688	-21.1558	0.95577	-21.7006		0.32781	-21.5583	0.32798	-21.5503		0.32765	-21.4387	0.66068	-21.345		1	-10.0626	1	-10.9346		0.32784	-10.7481	0.3278	-11.4247
1	-21.1558	1	-21.7007		0.37417	-21.5582	0.37437	-21.5503		0.37398	-21.4385	0.71201	-21.3444		0	--	0	--		0.37419	-10.7544	0.37416	-11.4237
0	--	0	--		0.42053	-21.5578	0.42077	-21.5501		0.42032	-21.4381	0.75185	-21.3442		0	-7.7354	0	-10.7928		0.42053	-10.7838	0.42052	-11.3941
0	-21.1558	0	-21.7007		0.46688	-21.5572	0.46716	-21.5497		0.46666	-21.4376	0.7917	-21.3442		0.05463	-7.6726	0.05464	-10.9566		0.46688	-10.8342	0.46688	-11.3417
0.04312	-21.1558	0.04423	-21.7005		0.51324	-21.5564	0.51355	-21.5495		0.51299	-21.4371	0.83155	-21.3444		0.10926	-7.49797	0.10929	-10.7396		0.51323	-10.7555	0.51324	-11.3118
0.08624	-21.1559	0.08846	-21.7		0.5596	-21.5556	0.55994	-21.5493		0.55933	-21.4374	0.87366	-21.3444		0.1639	-7.24865	0.16393	-10.6829		0.55958	-10.7206	0.5596	-11.3969
0.12936	-21.156	0.13269	-21.7004		0.61106	-21.5565	0.61144	-21.5495		0.61076	-21.4371	0.91577	-21.3449		0.21857	-7.32371	0.21856	-10.8515		0.61103	-10.7635	0.61106	-11.3144
0.17972	-21.1553	0.18222	-21.7002		0.66252	-21.5573	0.66293	-21.5498		0.6622	-21.4377	0.95789	-21.3453		0.27324	-7.29567	0.27318	-10.7284		0.66247	-10.8217	0.66252	-11.3495
0.23009	-21.1552	0.23176	-21.7014		0.71398	-21.558	0.71443	-21.5502		0.71363	-21.4383	1	-21.3455		0.32791	-7.15791	0.32781	-10.6055		0.71392	-10.7715	0.71398	-11.4055
0.28045	-21.1557	0.28129	-21.7025		0.75468	-21.5567	0.75531	-21.5508		0.75419	-21.4372	0	--		0.38582	-7.39954	0.38575	-10.7427		0.75464	-10.7824	0.75469	-11.472
0.33082	-21.1568	0.33083	-21.7037		0.79539	-21.5557	0.79619	-21.5517		0.79475	-21.4363	0	-21.3442		0.44373	-7.58031	0.4437	-10.819		0.79536	-10.8175	0.79539	-11.4327
0.3787	-21.1555	0.37852	-21.7021		0.8361	-21.5553	0.83707	-21.5519		0.8353	-21.4357	0.04211	-21.3446		0.50164	-7.69004	0.50164	-10.9402		0.83608	-10.8388	0.8361	-11.2658
0.42658	-21.1547	0.42621	-21.7005		0.87707	-21.5557	0.8778	-21.551		0.87648	-21.4364	0.08423	-21.3445		0.55955	-7.7354	0.55959	-10.7928		0.87706	-10.8172	0.87707	-11.3253
0.47447	-21.1546	0.47391	-21.7015		0.91805	-21.556	0.91853	-21.5497		0.91765	-21.4369	0.12634	-21.3436		0.61098	-7.6978	0.61105	-10.9239		0.91804	-10.7675	0.91805	-11.3743
0.52235	-21.1551	0.5216	-21.7015		0.95902	-21.556	0.95927	-21.5493		0.95883	-21.4373	0.16845	-21.3443		0.6624	-7.61117	0.6625	-10.8617		0.95902	-10.733	0.95902	-11.3335
0.57023	-21.1558	0.56929	-21.7007		1	-21.5556	1	-21.5493		1	-21.4374	0.22124	-21.3443		0.71382	-7.46802	0.71396	-10.7829		1	-10.7206	1	-11.3969
0.62338	-21.155	0.62223	-21.7016		0	--	0	--		0	--	0.27403	-21.3439		0.77496	-7.43614	0.77501	-10.8867		0	--	0	--
0.67654	-21.1546	0.67517	-21.7011		0	-21.5551	0	-21.5493		0	-21.4357	0.32682	-21.3444		0.8361	-7.24865	0.83607	-10.6829		0	-10.7184	0	-11.3012
0.72969	-21.1549	0.72811	-21.701		0.04098	-21.5549	0.04073	-21.5491		0.04117	-21.4352	0.37306	-21.3443		0.89074	-7.49797	0.89071	-10.7396		0.04098	-10.7308	0.04098	-11.3249
0.77667	-21.1549	0.77451	-21.7004		0.08195	-21.5542	0.08147	-21.5492		0.08235	-21.4344	0.4193	-21.3444		0.94537	-7.6726	0.94536	-10.9566		0.08196	-10.7654	0.08195	-11.3739
0.82366	-21.1553	0.82091	-21.7004		0.12293	-21.5547	0.1222	-21.5504		0.12352	-21.4351	0.46554	-21.3449		1	-7.7354	1	-10.7928		0.12294	-10.8155	0.12293	-11.3249
0.87064	-21.156	0.86731	-21.7004		0.1639	-21.5553	0.16293	-21.5518		0.1647	-21.4357	0.51178	-21.3444		0	--	0	--		0.16392	-10.8343	0.1639	-11.265
0.91376	-21.1559	0.91154	-21.7		0.20488	-21.5555	0.20419	-21.5516		0.20544	-21.436	0.55802	-21.3442		0	-7.72678	0	-10.7928		0.2049	-10.7898	0.20488	-11.4139
0.95688	-21.1558	0.95577	-21.7005		0.24586	-21.5563	0.24546	-21.5509		0.24617	-21.4367	0.60935	-21.3444		0.05463	-7.6638	0.05464	-10.7788		0.24588	-10.7441	0.24585	-11.5492
1	-21.1558	1	-21.7007		0.28683	-21.5573	0.28672	-21.5501		0.28691	-21.4377	0.66068	-21.345		0.10926	-7.48882	0.10929	-10.704		0.28686	-10.7329	0.28683	-11.4835
0	--	0	--		0.32781	-21.5583	0.32798	-21.5503		0.32765	-21.4387	0.71201	-21.3443		0.1639	-7.24865	0.16393	-10.6829		0.32784	-10.7421	0.3278	-11.4142
0	-21.1507	0	-21.7004		0.37417	-21.5567	0.37437	-21.5501		0.37398	-21.437	0.75185	-21.3439		0.21857	-7.31592	0.21856	-10.8515		0.37419	-10.72	0.37416	-11.4042
0.04312	-21.1505	0.04423	-21.7003		0.42053	-21.5554	0.42077	-21.5497		0.42032	-21.4356	0.7917	-21.3438		0.27324	-7.28874	0.27318	-10.7282		0.42053	-10.7087	0.42052	-11.3769
0.08624	-21.1499	0.08846	-21.6998		0.46688	-21.5544	0.46716	-21.5496		0.46666	-21.4346	0.83155	-21.3443		0.32791	-7.1579	0.32781	-10.6055		0.46688	-10.7101	0.46688	-11.3411
0.12936	-21.149	0.13269	-21.6993		0.51324	-21.5545	0.51355	-21.5493		0.51299	-21.4352	0.87366	-21.3436		0.38582	-7.09448	0.38575	-10.6648		0.51323	-10.7156	0.51324	-11.3114
0.17972	-21.1493	0.18222	-21.7001		0.5596	-21.5551	0.55994	-21.5493		0.55933	-21.4357	0.91577	-21.3445		0.44373	-7.36395	0.4437	-10.8183		0.55958	-10.7184	0.5596	-11.3012
0.23009	-21.1495	0.23176	-21.6994		0.61106	-21.5543	0.61144	-21.5494		0.61076	-21.4351	0.95789	-21.3446		0.50164	-7.63219	0.50164	-10.9192		0.61103	-10.715	0.61106	-11.314
0.28045	-21.1497	0.28129	-21.6983		0.66252	-21.5546	0.66293	-21.5496		0.6622	-21.4348	1	-21.3442		0.55955	-7.72678	0.55959	-10.7928		0.66247	-10.7091	0.66252	-11.3489
0.33082	-21.1498	0.33083	-21.6974		0.71398	-21.5558	0.71443	-21.5499		0.71363	-21.4361	0	--		0.61098	-7.65336	0.61105	-10.9233		0.71392	-10.7107	0.71398	-11.3874
0.3787	-21.1503	0.37852	-21.6986		0.75468	-21.5554	0.75531	-21.5498		0.75419	-21.4358	0	-21.344		0.6624	-7.43398	0.6625	-10.8609		0.75464	-10.7253	0.75469	-11.4449
0.42658	-21.1508	0.42621	-21.7		0.79539	-21.5552	0.79619	-21.551		0.79475	-21.4356	0.04211	-21.344		0.71382	-7.13917	0.71396	-10.7083		0.79536	-10.7783	0.79539	-11.3591
0.47447	-21.1512	0.47391	-21.6991		0.8361	-21.5553	0.83707	-21.5518		0.8353	-21.4357	0.08423	-21.3439		0.77496	-7.22692	0.77501	-10.8021		0.83608	-10.8343	0.8361	-11.265
0.52235	-21.1512	0.5216	-21.6994		0.87707	-21.5547	0.8778	-21.5504		0.87648	-21.4351	0.12634	-21.3435		0.8361	-7.24865	0.83607	-10.6829		0.87706	-10.8155	0.87707	-11.3249
0.57023	-21.1507	0.56929	-21.7004		0.91805	-21.5542	0.91853	-21.5492		0.91765	-21.4344	0.16845	-21.343		0.89074	-7.48882	0.89071	-10.704		0.91804	-10.7654	0.91805	-11.3739
0.62338	-21.1512	0.62223	-21.6993		0.95902	-21.5549	0.95927	-21.5491		0.95883	-21.4352	0.22124	-21.3431		0.94537	-7.6638	0.94536	-10.7788		0.95902	-10.7308	0.95902	-11.3249
0.67654	-21.1511	0.67517	-21.6995		1	-21.5551	1	-21.5493		1	-21.4357	0.27403	-21.3437		1	-7.72678	1	-10.7928		1	-10.7184	1	-11.3012
0.72969	-21.1507	0.72811	-21.6995		0	--	0	--		0	--	0.32682	-21.3435		0	--	0	--		0	--	0	--
0.77667	-21.1502	0.77451	-21.7001		0	-21.5551	0	-21.5486		0	-21.4355	0.37306	-21.344		0	-6.68023	0	-10.7548		0	-7.37605	0	-11.3
0.82366	-21.1496	0.82091	-21.7		0.04098	-21.554	0.04073	-21.5489		0.04117	-21.4351	0.4193	-21.3443		0.05463	-6.76493	0.05464	-10.7409		0.04098	-7.41281	0.04098	-11.2897
0.87064	-21.149	0.86731	-21.6993		0.08195	-21.5538	0.08147	-21.5491		0.08235	-21.4342	0.46554	-21.3443		0.10926	-6.98012	0.10929	-10.7018		0.08196	-7.36573	0.08195	-11.2597
0.91376	-21.1499	0.91154	-21.6998		0.12293	-21.5525	0.1222	-21.5489		0.12352	-21.4333	0.51178	-21.3441		0.1639	-7.23957	0.16393	-10.6454		0.12294	-7.2146	0.12293	-11.2136
0.95688	-21.1505	0.95577	-21.7003		0.1639	-21.5511	0.16293	-21.5486		0.1647	-21.4323	0.55802	-21.344		0.21857	-7.09601	0.21856	-10.4929		0.16392	-7.01514	0.1639	-11.2646
1	-21.1507	1	-21.7004		0.20488	-21.5511	0.20419	-21.5488		0.20544	-21.4326	0.60935	-21.3442		0.27324	-6.9381	0.27318	-10.5302		0.2049	-7.06806	0.20488	-11.1845
0	--	0	--		0.24586	-21.5511	0.24546	-21.5493		0.24617	-21.4327	0.66068	-21.3443		0.32791	-7.1518	0.32781	-10.6054		0.24588	-7.07833	0.24585	-11.2487
0	-21.1507	0	-21.7004		0.28683	-21.5512	0.28672	-21.5498		0.28691	-21.4326	0.71201	-21.3441		0.38582	-7.09396	0.38575	-10.6643		0.28686	-7.05544	0.28683	-11.3358
0.04312	-21.1504	0.04423	-21.7002		0.32781	-21.5511	0.32798	-21.5497		0.32765	-21.4324	0.75185	-21.3438		0.44373	-6.94066	0.4437	-10.7611		0.32784	-7.02998	0.3278	-11.4139
0.08624	-21.1498	0.08846	-21.6998		0.37417	-21.5515	0.37437	-21.5498		0.37398	-21.4327	0.7917	-21.3435		0.50164	-6.77935	0.50164	-10.6039		0.37419	-7.08336	0.37416	-11.4034
0.12936	-21.149	0.13269	-21.6993		0.42053	-21.5523	0.42077	-21.5497		0.42032	-21.4334	0.83155	-21.343		0.55955	-6.68023	0.55959	-10.7548		0.42053	-7.21976	0.42052	-11.3762
0.17972	-21.1493	0.18222	-21.7001		0.46688	-21.5534	0.46716	-21.5492		0.46666	-21.4342	0.87366	-21.3435		0.61098	-6.76432	0.61105	-10.6073		0.46688	-7.34801	0.46688	-11.3291
0.23009	-21.1495	0.23176	-21.6993		0.51324	-21.5544	0.51355	-21.5488		0.51299	-21.435	0.91577	-21.3439		0.6624	-6.90207	0.6625	-10.7197		0.51323	-7.403	0.51324	-11.3052
0.28045	-21.1497	0.28129	-21.6983		0.5596	-21.5551	0.55994	-21.5486		0.55933	-21.4355	0.95789	-21.344		0.71382	-7.04917	0.71396	-10.7077		0.55958	-7.37605	0.5596	-11.3
0.33082	-21.1498	0.33083	-21.6974		0.61106	-21.5543	0.61144	-21.5488		0.61076	-21.4349	1	-21.344		0.77496	-7.19172	0.77501	-10.5926		0.61103	-7.40148	0.61106	-11.3071
0.3787	-21.1502	0.37852	-21.6986		0.66252	-21.5532	0.66293	-21.5493		0.6622	-21.434	0	--		0.8361	-7.23957	0.83607	-10.6454		0.66247	-7.32463	0.66252	-11.3358
0.42658	-21.1503	0.42621	-21.7		0.71398	-21.552	0.71443	-21.5497		0.71363	-21.4331	0	-21.3435		0.89074	-6.98012	0.89071	-10.7018		0.71392	-7.17046	0.71398	-11.3866
0.47447	-21.1503	0.47391	-21.699		0.75468	-21.5521	0.75531	-21.5495		0.75419	-21.4333	0.04211	-21.3434		0.94537	-6.76493	0.94536	-10.7409		0.75464	-7.19163	0.75469	-11.2869
0.52235	-21.1502	0.5216	-21.6992		0.79539	-21.5517	0.79619	-21.5489		0.79475	-21.4329	0.08423	-21.3438		1	-6.68023	1	-10.7548		0.79536	-7.13183	0.79539	-11.2046
0.57023	-21.1507	0.56929	-21.7004		0.8361	-21.5511	0.83707	-21.5486		0.8353	-21.4323	0.12634	-21.3434		0	--	0	--		0.83608	-7.01514	0.8361	-11.2646
0.62338	-21.1502	0.62223	-21.6991		0.87707	-21.5525	0.8778	-21.5489		0.87648	-21.4333	0.16845	-21.3429		0	-6.67881	0	-10.7533		0.87706	-7.2146	0.87707	-11.2136
0.67654	-21.1503	0.67517	-21.6993		0.91805	-21.5538	0.91853	-21.5491		0.91765	-21.4342	0.22124	-21.343		0.05463	-6.75981	0.05464	-10.5748		0.91804	-7.36573	0.91805	-11.2597
0.72969	-21.1502	0.72811	-21.6995		0.95902	-21.554	0.95927	-21.5489		0.95883	-21.4351	0.27403	-21.3436		0.10926	-6.97222	0.10929	-10.6222		0.95902	-7.41281	0.95902	-11.2897
0.77667	-21.1498	0.77451	-21.7001		1	-21.5551	1	-21.5486		1	-21.4355	0.32682	-21.3435		0.1639	-7.23957	0.16393	-10.6454		1	-7.37605	1	-11.3
0.82366	-21.1493	0.82091	-21.6999		0	--	0	--		0	--	0.37306	-21.3435		0.21857	-7.08683	0.21856	-10.4928		0	--	0	--
0.87064	-21.149	0.86731	-21.6993		0	-21.555	0	-21.5484		0	-21.4343	0.4193	-21.3439		0.27324	-6.93299	0.27318	-10.5301		0	-7.34079	0	-11.2999
0.91376	-21.1498	0.91154	-21.6998		0.04098	-21.5539	0.04073	-21.5486		0.04117	-21.4344	0.46554	-21.3437		0.32791	-7.1518	0.32781	-10.6053		0.04098	-7.31943	0.04098	-11.2894
0.95688	-21.1504	0.95577	-21.7002		0.08195	-21.5526	0.08147	-21.549		0.08235	-21.4342	0.51178	-21.3435		0.38582	-7.02257	0.38575	-10.4555		0.08196	-7.25456	0.08195	-11.2594
1	-21.1507	1	-21.7004		0.12293	-21.5513	0.1222	-21.5486		0.12352	-21.4332	0.55802	-21.3435		0.44373	-6.93975	0.4437	-10.4496		0.12294	-7.14957	0.12293	-11.2134
0	--	0	--		0.1639	-21.5511	0.16293	-21.5486		0.1647	-21.4323	0.60935	-21.3435		0.50164	-6.77827	0.50164	-10.5862		0.16392	-7.01163	0.1639	-11.2642
0	-21.1502	0	-21.6992		0.20488	-21.5511	0.20419	-21.5488		0.20544	-21.4326	0.66068	-21.3437		0.55955	-6.67881	0.55959	-10.7533		0.2049	-7.06793	0.20488	-11.1802
0.04312	-21.1501	0.04423	-21.6994		0.24586	-21.5511	0.24546	-21.5493		0.24617	-21.4327	0.71201	-21.344		0.61098	-6.76324	0.61105	-10.6064		0.24588	-7.07395	0.24585	-11.2411
0.08624	-21.1497	0.08846	-21.6997		0.28683	-21.5512	0.28672	-21.5498		0.28691	-21.4326	0.75185	-21.3436		0.6624	-6.90111	0.6625	-10.4674		0.28686	-7.04672	0.28683	-11.3251
0.12936	-21.1489	0.13269	-21.6992		0.32781	-21.5511	0.32798	-21.5497		0.32765	-21.4324	0.7917	-21.3431		0.71382	-7.04851	0.71396	-10.4062		0.32784	-7.01437	0.3278	-11.4045
0.17972	-21.1491	0.18222	-21.7001		0.37417	-21.5515	0.37437	-21.5497		0.37398	-21.4325	0.83155	-21.3429		0.77496	-6.95773	0.77501	-10.4943		0.37419	-7.07851	0.37416	-11.3849
0.23009	-21.1493	0.23176	-21.6993		0.42053	-21.5523	0.42077	-21.5493		0.42032	-21.433	0.87366	-21.3434		0.8361	-7.23957	0.83607	-10.6454		0.42053	-7.21665	0.42052	-11.3601
0.28045	-21.1496	0.28129	-21.6983		0.46688	-21.5534	0.46716	-21.5491		0.46666	-21.4339	0.91577	-21.3438		0.89074	-6.97222	0.89071	-10.6222		0.46688	-7.33455	0.46688	-11.2624
0.33082	-21.1498	0.33083	-21.6974		0.51324	-21.5539	0.51355	-21.5487		0.51299	-21.4342	0.95789	-21.3434		0.94537	-6.75981	0.94536	-10.5748		0.51323	-7.37801	0.51324	-11.2833
0.3787	-21.1492	0.37852	-21.6977		0.5596	-21.555	0.55994	-21.5484		0.55933	-21.4343	1	-21.3435		1	-6.67881	1	-10.7533		0.55958	-7.34079	0.5596	-11.2999
0.42658	-21.1484	0.42621	-21.6982		0.61106	-21.5539	0.61144	-21.5488		0.61076	-21.4342	0	--		0	--	0	--		0.61103	-7.37778	0.61106	-11.2684
0.47447	-21.1486	0.47391	-21.6987		0.66252	-21.5531	0.66293	-21.5491		0.6622	-21.4336	0	-21.3434		0	-6.67792	0	-10.5567		0.66247	-7.3136	0.66252	-11.2985
0.52235	-21.1498	0.5216	-21.6991		0.71398	-21.552	0.71443	-21.5494		0.71363	-21.4328	0.04211	-21.3431		0.05463	-6.73239	0.05464	-10.5376		0.71392	-7.17025	0.71398	-11.3695
0.57023	-21.1502	0.56929	-21.6992		0.75468	-21.5517	0.75531	-21.5492		0.75419	-21.4327	0.08423	-21.3428		0.10926	-6.71747	0.10929	-10.5849		0.75464	-7.15629	0.75469	-11.2745
0.62338	-21.1497	0.62223	-21.699		0.79539	-21.5509	0.79619	-21.5486		0.79475	-21.4323	0.12634	-21.3433		0.1639	-6.60959	0.16393	-10.482		0.79536	-7.08818	0.79539	-11.1983
0.67654	-21.1483	0.67517	-21.6986		0.8361	-21.5511	0.83707	-21.5486		0.8353	-21.4323	0.16845	-21.3427		0.21857	-6.71287	0.21856	-10.4843		0.83608	-7.01163	0.8361	-11.2642
0.72969	-21.1486	0.72811	-21.6981		0.87707	-21.5513	0.8778	-21.5486		0.87648	-21.4332	0.22124	-21.3428		0.27324	-6.90205	0.27318	-10.3324		0.87706	-7.14957	0.87707	-11.2134
0.77667	-21.1487	0.77451	-21.6991		0.91805	-21.5526	0.91853	-21.549		0.91765	-21.4342	0.27403	-21.343		0.32791	-6.70541	0.32781	-10.2195		0.91804	-7.25456	0.91805	-11.2594
0.82366	-21.1488	0.82091	-21.6999		0.95902	-21.5539	0.95927	-21.5486		0.95883	-21.4344	0.32682	-21.3434		0.38582	-6.84591	0.38575	-10.3481		0.95902	-7.31943	0.95902	-11.2894
0.87064	-21.1489	0.86731	-21.6992		1	-21.555	1	-21.5484		1	-21.4343	0.37306	-21.3431		0.44373	-6.66552	0.4437	-10.4066		1	-7.34079	1	-11.2999
0.91376	-21.1497	0.91154	-21.6997		0	--	0	--		0	--	0.4193	-21.3434		0.50164	-6.65127	0.50164	-10.5853		0	--	0	--
0.95688	-21.1501	0.95577	-21.6994		0	-21.555	0	-21.5484		0	-21.4342	0.46554	-21.3431		0.55955	-6.67792	0.55959	-10.5567		0	-7.34062	0	-11.2997
1	-21.1502	1	-21.6992		0.04098	-21.5538	0.04073	-21.5483		0.04117	-21.434	0.51178	-21.3434		0.61098	-6.65158	0.61105	-10.5922		0.04098	-7.31872	0.04098	-11.2504
0	--	0	--		0.08195	-21.5526	0.08147	-21.5481		0.08235	-21.4339	0.55802	-21.3434		0.6624	-6.6606	0.6625	-10.4445		0.08196	-7.25361	0.08195	-11.1464
0	-21.1467	0	-21.6992		0.12293	-21.5512	0.1222	-21.5483		0.12352	-21.4329	0.60935	-21.3433		0.71382	-6.73313	0.71396	-10.3859		0.12294	-7.14838	0.12293	-11.2021
0.04312	-21.147	0.04423	-21.6993		0.1639	-21.5504	0.16293	-21.548		0.1647	-21.4322	0.66068	-21.343		0.77496	-6.7779	0.77501	-10.4779		0.16392	-7.00853	0.1639	-11.158
0.08624	-21.1481	0.08846	-21.6997		0.20488	-21.5504	0.20419	-21.5481		0.20544	-21.4319	0.71201	-21.3434		0.8361	-6.60959	0.83607	-10.482		0.2049	-6.98798	0.20488	-11.1772
0.12936	-21.1489	0.13269	-21.6992		0.24586	-21.5507	0.24546	-21.5487		0.24617	-21.4319	0.75185	-21.3431		0.89074	-6.71747	0.89071	-10.5849		0.24588	-6.98855	0.24585	-11.2358
0.17972	-21.1491	0.18222	-21.7001		0.28683	-21.551	0.28672	-21.5494		0.28691	-21.4321	0.7917	-21.343		0.94537	-6.73239	0.94536	-10.5376		0.28686	-6.99719	0.28683	-11.3185
0.23009	-21.1493	0.23176	-21.6993		0.32781	-21.5511	0.32798	-21.5497		0.32765	-21.4324	0.83155	-21.3427		1	-6.67792	1	-10.5567		0.32784	-7.01143	0.3278	-11.4023
0.28045	-21.1496	0.28129	-21.6983		0.37417	-21.5508	0.37437	-21.5495		0.37398	-21.4323	0.87366	-21.3433		0	--	0	--		0.37419	-7.01081	0.37416	-11.2812
0.33082	-21.1498	0.33083	-21.6974		0.42053	-21.5504	0.42077	-21.5489		0.42032	-21.4326	0.91577	-21.3428		0	-6.67724	0	-10.5196		0.42053	-6.90832	0.42052	-11.1592
0.3787	-21.1491	0.37852	-21.6977		0.46688	-21.5518	0.46716	-21.5482		0.46666	-21.4336	0.95789	-21.3431		0.05463	-6.5855	0.05464	-10.5305		0.46688	-7.02036	0.46688	-11.159
0.42658	-21.1483	0.42621	-21.6982		0.51324	-21.5534	0.51355	-21.5481		0.51299	-21.4341	1	-21.3434		0.10926	-6.48506	0.10929	-10.3144		0.51323	-7.22162	0.51324	-11.2675
0.47447	-21.1475	0.47391	-21.6987		0.5596	-21.555	0.55994	-21.5484		0.55933	-21.4342	0	--		0.1639	-6.60959	0.16393	-10.482		0.55958	-7.34062	0.5596	-11.2997
0.52235	-21.1469	0.5216	-21.699		0.61106	-21.5532	0.61144	-21.5481		0.61076	-21.4341	0	-21.3424		0.21857	-6.70963	0.21856	-10.4843		0.61103	-7.20221	0.61106	-11.2532
0.57023	-21.1467	0.56929	-21.6992		0.66252	-21.5515	0.66293	-21.5483		0.6622	-21.4335	0.04211	-21.3423		0.27324	-6.89295	0.27318	-10.3324		0.66247	-6.9709	0.66252	-11.1357
0.62338	-21.1469	0.62223	-21.699		0.71398	-21.5501	0.71443	-21.5491		0.71363	-21.4322	0.08423	-21.3424		0.32791	-6.70539	0.32781	-10.2195		0.71392	-6.95172	0.71398	-11.1964
0.67654	-21.1477	0.67517	-21.6986		0.75468	-21.5504	0.75531	-21.5488		0.75419	-21.4323	0.12634	-21.343		0.38582	-6.68779	0.38575	-10.271		0.75464	-6.95304	0.75469	-11.1666
0.72969	-21.1486	0.72811	-21.698		0.79539	-21.5506	0.79619	-21.5484		0.79475	-21.4323	0.16845	-21.3426		0.44373	-6.66494	0.4437	-10.4059		0.79536	-6.99161	0.79539	-11.1731
0.77667	-21.1487	0.77451	-21.6991		0.8361	-21.5504	0.83707	-21.548		0.8353	-21.4322	0.22124	-21.3427		0.50164	-6.65043	0.50164	-10.5119		0.83608	-7.00853	0.8361	-11.158
0.82366	-21.1488	0.82091	-21.6998		0.87707	-21.5512	0.8778	-21.5483		0.87648	-21.4329	0.27403	-21.3429		0.55955	-6.67724	0.55959	-10.5196		0.87706	-7.14838	0.87707	-11.2021
0.87064	-21.1489	0.86731	-21.6992		0.91805	-21.5526	0.91853	-21.5481		0.91765	-21.4339	0.32682	-21.3434		0.61098	-6.65072	0.61105	-10.5157		0.91804	-7.25361	0.91805	-11.1464
0.91376	-21.1481	0.91154	-21.6997		0.95902	-21.5538	0.95927	-21.5483		0.95883	-21.434	0.37306	-21.3427		0.6624	-6.65995	0.6625	-10.4437		0.95902	-7.31872	0.95902	-11.2504
0.95688	-21.147	0.95577	-21.6993		1	-21.555	1	-21.5484		1	-21.4342	0.4193	-21.3427		0.71382	-6.68101	0.71396	-10.309		1	-7.34062	1	-11.2997
1	-21.1467	1	-21.6992		0	--	0	--		0	--	0.46554	-21.3428		0.77496	-6.6205	0.77501	-10.4069		0	--	0	--
0	--	0	--		0	-21.5537	0	-21.548		0	-21.4339	0.51178	-21.3423		0.8361	-6.60959	0.83607	-10.482		0	-7.30418	0	-11.0939
0	-21.1466	0	-21.6972		0.04098	-21.5536	0.04073	-21.5478		0.04117	-21.4335	0.55802	-21.3424		0.89074	-6.48506	0.89071	-10.3144		0.04098	-7.16593	0.04098	-11.1078
0.04312	-21.147	0.04423	-21.6976		0.08195	-21.5524	0.08147	-21.5479		0.08235	-21.4326	0.60935	-21.3423		0.94537	-6.5855	0.94536	-10.5305		0.08196	-6.92226	0.08195	-11.1461
0.08624	-21.1479	0.08846	-21.6984		0.12293	-21.5512	0.1222	-21.5473		0.12352	-21.4318	0.66068	-21.3429		1	-6.67724	1	-10.5196		0.12294	-6.84941	0.12293	-11.2018
0.12936	-21.1489	0.13269	-21.699		0.1639	-21.5504	0.16293	-21.5479		0.1647	-21.4322	0.71201	-21.3426		0	--	0	--		0.16392	-7.00821	0.1639	-11.1574
0.17972	-21.1483	0.18222	-21.698		0.20488	-21.5504	0.20419	-21.5481		0.20544	-21.4319	0.75185	-21.343		0	-6.29616	0	-10.1789		0.2049	-6.97476	0.20488	-11.1741
0.23009	-21.1473	0.23176	-21.697		0.24586	-21.5507	0.24546	-21.5486		0.24617	-21.4319	0.7917	-21.3427		0.05463	-6.30656	0.05464	-10.2126		0.24588	-6.97558	0.24585	-11.2293
0.28045	-21.1461	0.28129	-21.6968		0.28683	-21.551	0.28672	-21.5494		0.28691	-21.4321	0.83155	-21.3426		0.10926	-6.40689	0.10929	-10.2995		0.28686	-6.98572	0.28683	-11.309
0.33082	-21.1449	0.33083	-21.6974		0.32781	-21.5511	0.32798	-21.5496		0.32765	-21.4324	0.87366	-21.343		0.1639	-6.39945	0.16393	-10.0995		0.32784	-7.00932	0.3278	-11.3841
0.3787	-21.1459	0.37852	-21.6972		0.37417	-21.5505	0.37437	-21.5489		0.37398	-21.4318	0.91577	-21.3424		0.21857	-6.43644	0.21856	-10.1107		0.37419	-6.91207	0.37416	-11.2661
0.42658	-21.1472	0.42621	-21.6971		0.42053	-21.5504	0.42077	-21.5483		0.42032	-21.4318	0.95789	-21.3423		0.27324	-6.54196	0.27318	-10.1479		0.42053	-6.79512	0.42052	-11.1494
0.47447	-21.1475	0.47391	-21.6981		0.46688	-21.5518	0.46716	-21.5481		0.46666	-21.4323	1	-21.3424		0.32791	-6.69733	0.32781	-10.2195		0.46688	-6.96659	0.46688	-11.1486
0.52235	-21.1467	0.5216	-21.6978		0.51324	-21.5534	0.51355	-21.548		0.51299	-21.4334	0	--		0.38582	-6.6875	0.38575	-10.2706		0.51323	-7.17599	0.51324	-11.1379
0.57023	-21.1466	0.56929	-21.6972		0.5596	-21.5537	0.55994	-21.548		0.55933	-21.4339	0	-21.3421		0.44373	-6.50302	0.4437	-10.3164		0.55958	-7.30418	0.5596	-11.0939
0.62338	-21.1468	0.62223	-21.6979		0.61106	-21.5532	0.61144	-21.548		0.61076	-21.4333	0.04211	-21.3423		0.50164	-6.30899	0.50164	-10.2158		0.61103	-7.15561	0.61106	-11.148
0.67654	-21.1477	0.67517	-21.6978		0.66252	-21.5514	0.66293	-21.5482		0.6622	-21.4321	0.08423	-21.3418		0.55955	-6.29616	0.55959	-10.1789		0.66247	-6.91555	0.66252	-11.1265
0.72969	-21.1468	0.72811	-21.6971		0.71398	-21.55	0.71443	-21.5484		0.71363	-21.432	0.12634	-21.3419		0.61098	-6.30611	0.61105	-10.2082		0.71392	-6.79178	0.71398	-11.1848
0.77667	-21.1479	0.77451	-21.6974		0.75468	-21.5501	0.75531	-21.548		0.75419	-21.432	0.16845	-21.3425		0.6624	-6.42563	0.6625	-10.2895		0.75464	-6.86798	0.75469	-11.1573
0.82366	-21.1486	0.82091	-21.6983		0.79539	-21.5504	0.79619	-21.5478		0.79475	-21.4322	0.22124	-21.3426		0.71382	-6.68062	0.71396	-10.3084		0.79536	-6.97337	0.79539	-11.1496
0.87064	-21.1489	0.86731	-21.699		0.8361	-21.5504	0.83707	-21.5479		0.8353	-21.4322	0.27403	-21.3423		0.77496	-6.48117	0.77501	-10.2006		0.83608	-7.00821	0.8361	-11.1574
0.91376	-21.1479	0.91154	-21.6984		0.87707	-21.5512	0.8778	-21.5473		0.87648	-21.4318	0.32682	-21.3418		0.8361	-6.39945	0.83607	-10.0995		0.87706	-6.84941	0.87707	-11.2018
0.95688	-21.147	0.95577	-21.6976		0.91805	-21.5524	0.91853	-21.5479		0.91765	-21.4326	0.37306	-21.3423		0.89074	-6.40689	0.89071	-10.2995		0.91804	-6.92226	0.91805	-11.1461
1	-21.1466	1	-21.6972		0.95902	-21.5536	0.95927	-21.5478		0.95883	-21.4335	0.4193	-21.342		0.94537	-6.30656	0.94536	-10.2126		0.95902	-7.16593	0.95902	-11.1078
0	--	0	--		1	-21.5537	1	-21.548		1	-21.4339	0.46554	-21.3421		1	-6.29616	1	-10.1789		1	-7.30418	1	-11.0939
0	-21.1458	0	-21.6972		0	--	0	--		0	--	0.51178	-21.3423		0	--	0	--		0	--	0	--
0.04312	-21.147	0.04423	-21.6975		0	-21.5526	0	-21.5477		0	-21.4316	0.55802	-21.3421		0	-6.02822	0	-9.82553		0	-6.50052	0	-11.0937
0.08624	-21.1478	0.08846	-21.6983		0.04098	-21.5524	0.04073	-21.5477		0.04117	-21.4315	0.60935	-21.3423		0.05463	-6.15992	0.05464	-9.85627		0.04098	-6.55305	0.04098	-11.1075
0.12936	-21.1489	0.13269	-21.699		0.08195	-21.5518	0.08147	-21.5471		0.08235	-21.431	0.66068	-21.342		0.10926	-6.33975	0.10929	-9.94849		0.08196	-6.6849	0.08195	-11.1288
0.17972	-21.1482	0.18222	-21.698		0.12293	-21.5508	0.1222	-21.5472		0.12352	-21.4316	0.71201	-21.3422		0.1639	-6.39945	0.16393	-10.0995		0.12294	-6.84749	0.12293	-11.0985
0.23009	-21.1473	0.23176	-21.697		0.1639	-21.55	0.16293	-21.5463		0.1647	-21.4318	0.75185	-21.342		0.21857	-6.43323	0.21856	-10.1107		0.16392	-6.9887	0.1639	-11.1569
0.28045	-21.1461	0.28129	-21.6968		0.20488	-21.5502	0.20419	-21.5466		0.20544	-21.4319	0.7917	-21.3423		0.27324	-6.53593	0.27318	-10.1479		0.2049	-6.90813	0.20488	-11.1418
0.33082	-21.1449	0.33083	-21.6973		0.24586	-21.5497	0.24546	-21.5474		0.24617	-21.4315	0.83155	-21.3425		0.32791	-6.69732	0.32781	-10.2195		0.24588	-6.77429	0.24585	-11.0553
0.3787	-21.1459	0.37852	-21.6971		0.28683	-21.5493	0.28672	-21.5485		0.28691	-21.4312	0.87366	-21.3419		0.38582	-6.48099	0.38575	-10.0801		0.28686	-6.63669	0.28683	-11.0084
0.42658	-21.1466	0.42621	-21.6971		0.32781	-21.5491	0.32798	-21.5486		0.32765	-21.431	0.91577	-21.3418		0.44373	-6.35965	0.4437	-9.95155		0.32784	-6.54781	0.3278	-10.9947
0.47447	-21.1468	0.47391	-21.6979		0.37417	-21.5494	0.37437	-21.5485		0.37398	-21.4316	0.95789	-21.3423		0.50164	-6.18073	0.50164	-9.85931		0.37419	-6.63871	0.37416	-11.012
0.52235	-21.1466	0.5216	-21.6977		0.42053	-21.5503	0.42077	-21.5483		0.42032	-21.4314	1	-21.3421		0.55955	-6.02822	0.55959	-9.82553		0.42053	-6.73471	0.42052	-11.0668
0.57023	-21.1458	0.56929	-21.6972		0.46688	-21.5515	0.46716	-21.5481		0.46666	-21.4312	0	--		0.61098	-6.15133	0.61105	-9.8523		0.46688	-6.74001	0.46688	-11.0689
0.62338	-21.1467	0.62223	-21.6978		0.51324	-21.5523	0.51355	-21.5478		0.51299	-21.4314	0	-21.3417		0.6624	-6.34355	0.6625	-9.92683		0.51323	-6.57328	0.51324	-11.0853
0.67654	-21.1468	0.67517	-21.6977		0.5596	-21.5526	0.55994	-21.5477		0.55933	-21.4316	0.04211	-21.3412		0.71382	-6.42989	0.71396	-10.0344		0.55958	-6.50052	0.5596	-11.0937
0.72969	-21.1464	0.72811	-21.6971		0.61106	-21.5523	0.61144	-21.5478		0.61076	-21.4313	0.08423	-21.3415		0.77496	-6.3954	0.77501	-10.0331		0.61103	-6.58871	0.61106	-11.0833
0.77667	-21.1472	0.77451	-21.6973		0.66252	-21.5513	0.66293	-21.5481		0.6622	-21.4313	0.12634	-21.3416		0.8361	-6.39945	0.83607	-10.0995		0.66247	-6.77979	0.66252	-11.0857
0.82366	-21.1481	0.82091	-21.6981		0.71398	-21.55	0.71443	-21.5484		0.71363	-21.4312	0.16845	-21.3425		0.89074	-6.33975	0.89071	-9.94849		0.71392	-6.72663	0.71398	-11.0445
0.87064	-21.1489	0.86731	-21.699		0.75468	-21.5501	0.75531	-21.5479		0.75419	-21.4313	0.22124	-21.3426		0.94537	-6.15992	0.94536	-9.85627		0.75464	-6.78761	0.75469	-11.0957
0.91376	-21.1478	0.91154	-21.6983		0.79539	-21.5501	0.79619	-21.5469		0.79475	-21.4316	0.27403	-21.3422		1	-6.02822	1	-9.82553		0.79536	-6.86824	0.79539	-11.1442
0.95688	-21.147	0.95577	-21.6975		0.8361	-21.55	0.83707	-21.5463		0.8353	-21.4318	0.32682	-21.3417		0	--	0	--		0.83608	-6.9887	0.8361	-11.1569
1	-21.1458	1	-21.6972		0.87707	-21.5508	0.8778	-21.5472		0.87648	-21.4316	0.37306	-21.3422		0	-4.30449	0	-7.82954		0.87706	-6.84749	0.87707	-11.0985
0	--	0	--		0.91805	-21.5518	0.91853	-21.5471		0.91765	-21.431	0.4193	-21.3417		0.05463	-4.27169	0.05464	-7.76041		0.91804	-6.6849	0.91805	-11.1288
0	-21.1458	0	-21.697		0.95902	-21.5524	0.95927	-21.5477		0.95883	-21.4315	0.46554	-21.3411		0.10926	-4.17593	0.10929	-7.56713		0.95902	-6.55305	0.95902	-11.1075
0.04312	-21.1445	0.04423	-21.6974		1	-21.5526	1	-21.5477		1	-21.4316	0.51178	-21.3413		0.1639	-4.01778	0.16393	-7.28874		1	-6.50052	1	-11.0937
0.08624	-21.1431	0.08846	-21.6981		0	--	0	--		0	--	0.55802	-21.3417		0.21857	-3.85944	0.21856	-7.38335		0	--	0	--
0.12936	-21.1419	0.13269	-21.6989		0	-21.549	0	-21.5476		0	-21.4311	0.60935	-21.3412		0.27324	-3.47973	0.27318	-7.36804		0	-6.49845	0	-11.0802
0.17972	-21.1421	0.18222	-21.6978		0.04098	-21.549	0.04073	-21.5476		0.04117	-21.4311	0.66068	-21.3412		0.32791	-3.19529	0.32781	-7.22952		0.04098	-6.55099	0.04098	-11.0739
0.23009	-21.1428	0.23176	-21.6969		0.08195	-21.5493	0.08147	-21.5469		0.08235	-21.431	0.71201	-21.3419		0.38582	-3.53906	0.38575	-7.48813		0.08196	-6.68292	0.08195	-11.0577
0.28045	-21.1438	0.28129	-21.6968		0.12293	-21.5497	0.1222	-21.5465		0.12352	-21.4315	0.75185	-21.3418		0.44373	-3.93719	0.4437	-7.67641		0.12294	-6.70837	0.12293	-11.0983
0.33082	-21.1449	0.33083	-21.6973		0.1639	-21.55	0.16293	-21.5463		0.1647	-21.4318	0.7917	-21.3421		0.50164	-4.20764	0.50164	-7.79037		0.16392	-6.97281	0.1639	-11.1564
0.3787	-21.1443	0.37852	-21.6967		0.20488	-21.5502	0.20419	-21.5466		0.20544	-21.4319	0.83155	-21.3425		0.55955	-4.30449	0.55959	-7.82954		0.2049	-6.90064	0.20488	-11.1415
0.42658	-21.1443	0.42621	-21.697		0.24586	-21.5497	0.24546	-21.5473		0.24617	-21.4315	0.87366	-21.3416		0.61098	-4.22758	0.61105	-7.79842		0.24588	-6.76193	0.24585	-11.0552
0.47447	-21.1445	0.47391	-21.6971		0.28683	-21.5493	0.28672	-21.5484		0.28691	-21.4312	0.91577	-21.3415		0.6624	-4.0111	0.6625	-7.70847		0.28686	-6.61855	0.28683	-11.0079
0.52235	-21.1451	0.5216	-21.6971		0.32781	-21.5491	0.32798	-21.5486		0.32765	-21.431	0.95789	-21.3412		0.71382	-3.68259	0.71396	-7.55953		0.32784	-6.51548	0.3278	-10.9939
0.57023	-21.1458	0.56929	-21.697		0.37417	-21.5494	0.37437	-21.5485		0.37398	-21.4311	1	-21.3417		0.77496	-3.93968	0.77501	-7.51602		0.37419	-6.60462	0.37416	-11.0104
0.62338	-21.145	0.62223	-21.6971		0.42053	-21.5497	0.42077	-21.5477		0.42032	-21.4312	0	--		0.8361	-4.01778	0.83607	-7.28874		0.42053	-6.72009	0.42052	-11.0616
0.67654	-21.1444	0.67517	-21.6971		0.46688	-21.5491	0.46716	-21.5469		0.46666	-21.4312	0	-21.3407		0.89074	-4.17593	0.89071	-7.56713		0.46688	-6.64388	0.46688	-11.0642
0.72969	-21.1442	0.72811	-21.6968		0.51324	-21.549	0.51355	-21.5474		0.51299	-21.4312	0.04211	-21.3407		0.94537	-4.27169	0.94536	-7.76041		0.51323	-6.55217	0.51324	-11.0721
0.77667	-21.1433	0.77451	-21.697		0.5596	-21.549	0.55994	-21.5476		0.55933	-21.4311	0.08423	-21.3411		1	-4.30449	1	-7.82954		0.55958	-6.49845	0.5596	-11.0802
0.82366	-21.1425	0.82091	-21.6979		0.61106	-21.5491	0.61144	-21.5474		0.61076	-21.4312	0.12634	-21.3414		0	--	0	--		0.61103	-6.56248	0.61106	-11.0702
0.87064	-21.1419	0.86731	-21.6989		0.66252	-21.5492	0.66293	-21.547		0.6622	-21.4312	0.16845	-21.3416		0	-4.30299	0	-7.8282		0.66247	-6.65894	0.66252	-11.0798
0.91376	-21.1431	0.91154	-21.6981		0.71398	-21.5499	0.71443	-21.548		0.71363	-21.4311	0.22124	-21.3415		0.05463	-4.07041	0.05464	-7.75795		0.71392	-6.67537	0.71398	-11.0407
0.95688	-21.1445	0.95577	-21.6974		0.75468	-21.55	0.75531	-21.5469		0.75419	-21.4311	0.27403	-21.3414		0.10926	-3.79946	0.10929	-7.56167		0.75464	-6.73301	0.75469	-11.0536
1	-21.1458	1	-21.697		0.79539	-21.55	0.79619	-21.5461		0.79475	-21.4314	0.32682	-21.3417		0.1639	-4.01777	0.16393	-7.28873		0.79536	-6.85915	0.79539	-11.1351
0	--	0	--		0.8361	-21.55	0.83707	-21.5463		0.8353	-21.4318	0.37306	-21.3414		0.21857	-3.85599	0.21856	-7.38272		0.83608	-6.97281	0.8361	-11.1564
0	-21.1399	0	-21.697		0.87707	-21.5497	0.8778	-21.5465		0.87648	-21.4315	0.4193	-21.3414		0.27324	-3.47492	0.27318	-7.36737		0.87706	-6.70837	0.87707	-11.0983
0.04312	-21.1401	0.04423	-21.6973		0.91805	-21.5493	0.91853	-21.5469		0.91765	-21.431	0.46554	-21.341		0.32791	-3.19528	0.32781	-7.2295		0.91804	-6.68292	0.91805	-11.0577
0.08624	-21.1409	0.08846	-21.698		0.95902	-21.549	0.95927	-21.5476		0.95883	-21.4311	0.51178	-21.3407		0.38582	-3.27524	0.38575	-7.15285		0.95902	-6.55099	0.95902	-11.0739
0.12936	-21.1419	0.13269	-21.6989		1	-21.549	1	-21.5476		1	-21.4311	0.55802	-21.3407		0.44373	-3.62911	0.4437	-7.40502		1	-6.49845	1	-11.0802
0.17972	-21.1421	0.18222	-21.6978		0	--	0	--		0	--	0.60935	-21.3407		0.50164	-4.09901	0.50164	-7.7122		0	--	0	--
0.23009	-21.1428	0.23176	-21.6969		0	-21.5476	0	-21.5462		0	-21.4307	0.66068	-21.3412		0.55955	-4.30299	0.55959	-7.8282		0	-6.16951	0	-10.998
0.28045	-21.1438	0.28129	-21.6968		0.04098	-21.5475	0.04073	-21.5463		0.04117	-21.4307	0.71201	-21.3413		0.61098	-4.13945	0.61105	-7.73626		0.04098	-6.24436	0.04098	-11.0109
0.33082	-21.1449	0.33083	-21.6973		0.08195	-21.5481	0.08147	-21.5467		0.08235	-21.431	0.75185	-21.3413		0.6624	-3.74633	0.6625	-7.48562		0.08196	-6.44302	0.08195	-11.0467
0.3787	-21.1437	0.37852	-21.6966		0.12293	-21.5495	0.1222	-21.5459		0.12352	-21.431	0.7917	-21.3415		0.71382	-3.3383	0.71396	-7.14668		0.12294	-6.62752	0.12293	-11.0587
0.42658	-21.1423	0.42621	-21.6969		0.1639	-21.55	0.16293	-21.5457		0.1647	-21.4313	0.83155	-21.3416		0.77496	-3.76442	0.77501	-7.24937		0.16392	-6.3258	0.1639	-11.0348
0.47447	-21.1411	0.47391	-21.6971		0.20488	-21.5496	0.20419	-21.5458		0.20544	-21.4312	0.87366	-21.3414		0.8361	-4.01777	0.83607	-7.28873		0.2049	-6.33351	0.20488	-11.0297
0.52235	-21.1402	0.5216	-21.6971		0.24586	-21.5493	0.24546	-21.5464		0.24617	-21.431	0.91577	-21.3411		0.89074	-3.79946	0.89071	-7.56167		0.24588	-6.35957	0.24585	-11.0163
0.57023	-21.1399	0.56929	-21.697		0.28683	-21.5491	0.28672	-21.5474		0.28691	-21.4309	0.95789	-21.3407		0.94537	-4.07041	0.94536	-7.75795		0.28686	-6.41027	0.28683	-11.0011
0.62338	-21.1403	0.62223	-21.6971		0.32781	-21.5491	0.32798	-21.5486		0.32765	-21.431	1	-21.3407		1	-4.30299	1	-7.8282		0.32784	-6.46734	0.3278	-10.9937
0.67654	-21.1414	0.67517	-21.6971		0.37417	-21.5492	0.37437	-21.5478		0.37398	-21.4309	0	--		0	--	0	--		0.37419	-6.54329	0.37416	-11.0057
0.72969	-21.1428	0.72811	-21.6967		0.42053	-21.5493	0.42077	-21.5462		0.42032	-21.4308	0	-21.3404		0	-3.20305	0	-7.26828		0.42053	-6.68224	0.42052	-11.0318
0.77667	-21.142	0.77451	-21.6969		0.46688	-21.5483	0.46716	-21.5466		0.46666	-21.4307	0.04211	-21.3407		0.05463	-3.52499	0.05464	-7.21971		0.46688	-6.47947	0.46688	-11.0619
0.82366	-21.1417	0.82091	-21.6977		0.51324	-21.5476	0.51355	-21.5464		0.51299	-21.4308	0.08423	-21.3402		0.10926	-3.52465	0.10929	-7.08727		0.51323	-6.26173	0.51324	-11.0155
0.87064	-21.1419	0.86731	-21.6989		0.5596	-21.5476	0.55994	-21.5462		0.55933	-21.4307	0.12634	-21.3411		0.1639	-3.1314	0.16393	-7.27801		0.55958	-6.16951	0.5596	-10.998
0.91376	-21.1409	0.91154	-21.698		0.61106	-21.5477	0.61144	-21.5464		0.61076	-21.4308	0.16845	-21.3416		0.21857	-3.22766	0.21856	-7.1005		0.61103	-6.28146	0.61106	-11.0196
0.95688	-21.1401	0.95577	-21.6973		0.66252	-21.5486	0.66293	-21.5464		0.6622	-21.4307	0.22124	-21.3414		0.27324	-3.26297	0.27318	-6.99473		0.66247	-6.53362	0.66252	-11.0556
1	-21.1399	1	-21.697		0.71398	-21.5497	0.71443	-21.5467		0.71363	-21.4311	0.27403	-21.3413		0.32791	-3.19019	0.32781	-7.22888		0.71392	-6.66297	0.71398	-11.0222
0	--	0	--		0.75468	-21.5496	0.75531	-21.5463		0.75419	-21.4311	0.32682	-21.3416		0.38582	-3.26979	0.38575	-7.15175		0.75464	-6.58706	0.75469	-11.0382
0	-21.1386	0	-21.6938		0.79539	-21.5499	0.79619	-21.5459		0.79475	-21.4314	0.37306	-21.3412		0.44373	-3.42949	0.4437	-7.11815		0.79536	-6.4571	0.79539	-11.0363
0.04312	-21.1383	0.04423	-21.6937		0.8361	-21.55	0.83707	-21.5457		0.8353	-21.4313	0.4193	-21.3408		0.50164	-3.40925	0.50164	-7.22891		0.83608	-6.3258	0.8361	-11.0348
0.08624	-21.1377	0.08846	-21.6934		0.87707	-21.5495	0.8778	-21.5459		0.87648	-21.431	0.46554	-21.3404		0.55955	-3.20305	0.55959	-7.26828		0.87706	-6.62752	0.87707	-11.0587
0.12936	-21.1369	0.13269	-21.6931		0.91805	-21.5481	0.91853	-21.5467		0.91765	-21.431	0.51178	-21.3406		0.61098	-3.394	0.61105	-7.23679		0.91804	-6.44302	0.91805	-11.0467
0.17972	-21.1369	0.18222	-21.6936		0.95902	-21.5475	0.95927	-21.5463		0.95883	-21.4307	0.55802	-21.3404		0.6624	-3.44283	0.6625	-7.14927		0.95902	-6.24436	0.95902	-11.0109
0.23009	-21.136	0.23176	-21.6938		1	-21.5476	1	-21.5462		1	-21.4307	0.60935	-21.3407		0.71382	-3.33823	0.71396	-7.09755		1	-6.16951	1	-10.998
0.28045	-21.1344	0.28129	-21.6936		0	--	0	--		0	--	0.66068	-21.3402		0.77496	-3.22671	0.77501	-7.2356		0	--	0	--
0.33082	-21.1322	0.33083	-21.6934		0	-21.547	0	-21.5462		0	-21.4306	0.71201	-21.3411		0.8361	-3.1314	0.83607	-7.27801		0	-5.59138	0	-10.998
0.3787	-21.1341	0.37852	-21.6938		0.04098	-21.5474	0.04073	-21.546		0.04117	-21.4307	0.75185	-21.3413		0.89074	-3.52465	0.89071	-7.08727		0.04098	-5.64118	0.04098	-11.0108
0.42658	-21.1358	0.42621	-21.6942		0.08195	-21.5481	0.08147	-21.5453		0.08235	-21.431	0.7917	-21.3414		0.94537	-3.52499	0.94536	-7.21971		0.08196	-5.7892	0.08195	-11.0465
0.47447	-21.1373	0.47391	-21.6941		0.12293	-21.5489	0.1222	-21.5453		0.12352	-21.4309	0.83155	-21.3416		1	-3.20305	1	-7.26828		0.12294	-6.02355	0.12293	-11.0398
0.52235	-21.1383	0.5216	-21.6938		0.1639	-21.55	0.16293	-21.5456		0.1647	-21.4313	0.87366	-21.3411		0	--	0	--		0.16392	-6.30567	0.1639	-11.0338
0.57023	-21.1386	0.56929	-21.6938		0.20488	-21.5496	0.20419	-21.5457		0.20544	-21.4312	0.91577	-21.3402		0	-3.20106	0	-7.26463		0.2049	-6.31384	0.20488	-11.0287
0.62338	-21.1382	0.62223	-21.6939		0.24586	-21.5493	0.24546	-21.5463		0.24617	-21.431	0.95789	-21.3407		0.05463	-3.22076	0.05464	-7.21425		0.24588	-6.3415	0.24585	-11.0155
0.67654	-21.137	0.67517	-21.6941		0.28683	-21.5491	0.28672	-21.5474		0.28691	-21.4309	1	-21.3404		0.10926	-3.21076	0.10929	-7.07696		0.28686	-6.39601	0.28683	-11.0004
0.72969	-21.1353	0.72811	-21.6941		0.32781	-21.5491	0.32798	-21.5486		0.32765	-21.431	0	--		0.1639	-3.1314	0.16393	-7.27801		0.32784	-6.46331	0.3278	-10.9933
0.77667	-21.1366	0.77451	-21.6939		0.37417	-21.5489	0.37437	-21.5467		0.37398	-21.4308	0	-21.34		0.21857	-3.22706	0.21856	-7.10034		0.37419	-6.29029	0.37416	-11.001
0.82366	-21.1371	0.82091	-21.6936		0.42053	-21.5492	0.42077	-21.5457		0.42032	-21.4307	0.04211	-21.3399		0.27324	-3.26036	0.27318	-6.99417		0.42053	-6.05326	0.42052	-11.0232
0.87064	-21.1369	0.86731	-21.6931		0.46688	-21.5481	0.46716	-21.5453		0.46666	-21.4307	0.08423	-21.3402		0.32791	-3.19018	0.32781	-7.22883		0.46688	-5.82277	0.46688	-11.0505
0.91376	-21.1377	0.91154	-21.6934		0.51324	-21.5474	0.51355	-21.546		0.51299	-21.4306	0.12634	-21.3401		0.38582	-3.26968	0.38575	-7.01912		0.51323	-5.6535	0.51324	-11.0142
0.95688	-21.1383	0.95577	-21.6937		0.5596	-21.547	0.55994	-21.5462		0.55933	-21.4306	0.16845	-21.3389		0.44373	-3.42942	0.4437	-7.01898		0.55958	-5.59138	0.5596	-10.998
1	-21.1386	1	-21.6938		0.61106	-21.5474	0.61144	-21.5459		0.61076	-21.4306	0.22124	-21.339		0.50164	-3.40903	0.50164	-7.19424		0.61103	-5.6675	0.61106	-11.018
0	--	0	--		0.66252	-21.5484	0.66293	-21.5452		0.6622	-21.4306	0.27403	-21.3392		0.55955	-3.20106	0.55959	-7.26463		0.66247	-5.87016	0.66252	-11.0446
0	-21.1386	0	-21.6937		0.71398	-21.5492	0.71443	-21.5458		0.71363	-21.4308	0.32682	-21.3392		0.61098	-3.39377	0.61105	-7.20892		0.71392	-6.1333	0.71398	-11.0148
0.04312	-21.1383	0.04423	-21.6936		0.75468	-21.5494	0.75531	-21.5459		0.75419	-21.431	0.37306	-21.34		0.6624	-3.44272	0.6625	-7.06266		0.75464	-6.11855	0.75469	-11.0228
0.08624	-21.1377	0.08846	-21.6934		0.79539	-21.5498	0.79619	-21.5458		0.79475	-21.4311	0.4193	-21.3399		0.71382	-3.26678	0.71396	-7.09614		0.79536	-6.19103	0.79539	-11.03
0.12936	-21.1369	0.13269	-21.6931		0.8361	-21.55	0.83707	-21.5456		0.8353	-21.4313	0.46554	-21.34		0.77496	-3.20138	0.77501	-7.00331		0.83608	-6.30567	0.8361	-11.0338
0.17972	-21.1369	0.18222	-21.6936		0.87707	-21.5489	0.8778	-21.5453		0.87648	-21.4309	0.51178	-21.34		0.8361	-3.1314	0.83607	-7.27801		0.87706	-6.02355	0.87707	-11.0398
0.23009	-21.136	0.23176	-21.6938		0.91805	-21.5481	0.91853	-21.5453		0.91765	-21.431	0.55802	-21.34		0.89074	-3.21076	0.89071	-7.07696		0.91804	-5.7892	0.91805	-11.0465
0.28045	-21.1344	0.28129	-21.6936		0.95902	-21.5474	0.95927	-21.546		0.95883	-21.4307	0.60935	-21.3399		0.94537	-3.22076	0.94536	-7.21425		0.95902	-5.64118	0.95902	-11.0108
0.33082	-21.1322	0.33083	-21.6934		1	-21.547	1	-21.5462		1	-21.4306	0.66068	-21.3401		1	-3.20106	1	-7.26463		1	-5.59138	1	-10.998
0.3787	-21.1339	0.37852	-21.6938		0	--	0	--		0	--	0.71201	-21.3401		0	--	0	--		0	--	0	--
0.42658	-21.1354	0.42621	-21.6941		0	-21.547	0	-21.5443		0	-21.4285	0.75185	-21.3401		0	-3.19932	0	-6.88031		0	-4.63087	0	-8.11505
0.47447	-21.137	0.47391	-21.694		0.04098	-21.5474	0.04073	-21.5442		0.04117	-21.4288	0.7917	-21.3393		0.05463	-3.2159	0.05464	-6.86748		0.04098	-4.54345	0.04098	-8.09321
0.52235	-21.1382	0.5216	-21.6938		0.08195	-21.5481	0.08147	-21.5445		0.08235	-21.4294	0.83155	-21.3389		0.10926	-3.20799	0.10929	-6.98719		0.08196	-4.30229	0.08195	-8.02597
0.57023	-21.1386	0.56929	-21.6937		0.12293	-21.5489	0.1222	-21.5447		0.12352	-21.4297	0.87366	-21.3401		0.1639	-3.12992	0.16393	-6.90674		0.12294	-3.94435	0.12293	-7.9175
0.62338	-21.138	0.62223	-21.6938		0.1639	-21.5496	0.16293	-21.5449		0.1647	-21.429	0.91577	-21.3402		0.21857	-3.02702	0.21856	-6.90616		0.16392	-3.50056	0.1639	-7.77511
0.67654	-21.1366	0.67517	-21.6941		0.20488	-21.5495	0.20419	-21.5448		0.20544	-21.4289	0.95789	-21.3399		0.27324	-2.9983	0.27318	-6.90664		0.2049	-3.7788	0.20488	-7.75092
0.72969	-21.1349	0.72811	-21.6941		0.24586	-21.549	0.24546	-21.5441		0.24617	-21.4285	1	-21.34		0.32791	-3.10844	0.32781	-6.81543		0.24588	-3.96264	0.24585	-7.67436
0.77667	-21.136	0.77451	-21.6939		0.28683	-21.5482	0.28672	-21.543		0.28691	-21.4278	0	--		0.38582	-3.16189	0.38575	-6.9359		0.28686	-4.02361	0.28683	-7.57194
0.82366	-21.1367	0.82091	-21.6935		0.32781	-21.5473	0.32798	-21.5417		0.32765	-21.427	0	-21.3397		0.44373	-3.15882	0.4437	-6.96339		0.32784	-3.95733	0.3278	-7.49393
0.87064	-21.1369	0.86731	-21.6931		0.37417	-21.5489	0.37437	-21.5434		0.37398	-21.4282	0.04211	-21.3396		0.50164	-3.03098	0.50164	-6.86618		0.37419	-4.1759	0.37416	-7.5662
0.91376	-21.1377	0.91154	-21.6934		0.42053	-21.5485	0.42077	-21.5443		0.42032	-21.4295	0.08423	-21.3399		0.55955	-3.19932	0.55959	-6.88031		0.42053	-4.36973	0.42052	-7.7325
0.95688	-21.1383	0.95577	-21.6936		0.46688	-21.5481	0.46716	-21.5448		0.46666	-21.4296	0.12634	-21.3386		0.61098	-3.03541	0.61105	-6.86908		0.46688	-4.51335	0.46688	-7.92863
1	-21.1386	1	-21.6937		0.51324	-21.5473	0.51355	-21.5441		0.51299	-21.4289	0.16845	-21.3388		0.6624	-3.11231	0.6625	-6.91521		0.51323	-4.60124	0.51324	-8.06995
0	--	0	--		0.5596	-21.547	0.55994	-21.5443		0.55933	-21.4285	0.22124	-21.339		0.71382	-3.25507	0.71396	-7.00491		0.55958	-4.63087	0.5596	-8.11505
0	-21.1357	0	-21.6934		0.61106	-21.5474	0.61144	-21.5441		0.61076	-21.4289	0.27403	-21.3392		0.77496	-3.16625	0.77501	-6.95795		0.61103	-4.59439	0.61106	-8.05862
0.04312	-21.1358	0.04423	-21.6933		0.66252	-21.5482	0.66293	-21.5448		0.6622	-21.4298	0.32682	-21.3392		0.8361	-3.12992	0.83607	-6.90674		0.66247	-4.4864	0.66252	-7.88815
0.08624	-21.1362	0.08846	-21.6932		0.71398	-21.5487	0.71443	-21.5443		0.71363	-21.4291	0.37306	-21.3394		0.89074	-3.20799	0.89071	-6.98719		0.71392	-4.31095	0.71398	-7.66738
0.12936	-21.1369	0.13269	-21.693		0.75468	-21.5488	0.75531	-21.5444		0.75419	-21.4294	0.4193	-21.3391		0.94537	-3.2159	0.94536	-6.86748		0.75464	-4.23751	0.75469	-7.77656
0.17972	-21.1363	0.18222	-21.6935		0.79539	-21.5492	0.79619	-21.5448		0.79475	-21.4293	0.46554	-21.3395		1	-3.19932	1	-6.88031		0.79536	-3.9437	0.79539	-7.81519
0.23009	-21.1352	0.23176	-21.6937		0.8361	-21.5496	0.83707	-21.5449		0.8353	-21.429	0.51178	-21.3397		0	--	0	--		0.83608	-3.50056	0.8361	-7.77511
0.28045	-21.1338	0.28129	-21.6935		0.87707	-21.5489	0.8778	-21.5447		0.87648	-21.4297	0.55802	-21.3397		0	-3.19644	0	-6.67992		0.87706	-3.94435	0.87707	-7.9175
0.33082	-21.1322	0.33083	-21.6934		0.91805	-21.5481	0.91853	-21.5445		0.91765	-21.4294	0.60935	-21.3397		0.05463	-2.83452	0.05464	-6.75666		0.91804	-4.30229	0.91805	-8.02597
0.3787	-21.1338	0.37852	-21.6936		0.95902	-21.5474	0.95927	-21.5442		0.95883	-21.4288	0.66068	-21.3395		0.10926	-2.99226	0.10929	-6.96801		0.95902	-4.54345	0.95902	-8.09321
0.42658	-21.1351	0.42621	-21.6938		1	-21.547	1	-21.5443		1	-21.4285	0.71201	-21.3388		0.1639	-3.12992	0.16393	-6.90673		1	-4.63087	1	-8.11505
0.47447	-21.1358	0.47391	-21.6938		0	--	0	--		0	--	0.75185	-21.3388		0.21857	-3.02362	0.21856	-6.90529		0	--	0	--
0.52235	-21.1359	0.5216	-21.6937		0	-21.5463	0	-21.5437		0	-21.426	0.7917	-21.3388		0.27324	-2.99008	0.27318	-6.90609		0	-4.62926	0	-8.11484
0.57023	-21.1357	0.56929	-21.6934		0.04098	-21.5468	0.04073	-21.5439		0.04117	-21.4262	0.83155	-21.3388		0.32791	-3.10842	0.32781	-6.81541		0.04098	-4.54224	0.04098	-8.09184
0.62338	-21.1359	0.62223	-21.6937		0.08195	-21.5471	0.08147	-21.5439		0.08235	-21.4271	0.87366	-21.3386		0.38582	-3.16183	0.38575	-6.90588		0.08196	-4.30175	0.08195	-8.02464
0.67654	-21.1357	0.67517	-21.6938		0.12293	-21.5483	0.1222	-21.5444		0.12352	-21.428	0.91577	-21.3399		0.44373	-3.08676	0.4437	-6.96153		0.12294	-3.94344	0.12293	-7.91624
0.72969	-21.1348	0.72811	-21.6937		0.1639	-21.5496	0.16293	-21.5449		0.1647	-21.429	0.95789	-21.3396		0.50164	-3.03058	0.50164	-6.76352		0.16392	-3.49648	0.1639	-7.77467
0.77667	-21.136	0.77451	-21.6936		0.20488	-21.5495	0.20419	-21.5448		0.20544	-21.4289	1	-21.3397		0.55955	-3.19644	0.55959	-6.67992		0.2049	-3.77655	0.20488	-7.74434
0.82366	-21.1366	0.82091	-21.6935		0.24586	-21.549	0.24546	-21.5441		0.24617	-21.4285	0	--		0.61098	-3.03497	0.61105	-6.74608		0.24588	-3.96108	0.24585	-7.6615
0.87064	-21.1369	0.86731	-21.693		0.28683	-21.5482	0.28672	-21.543		0.28691	-21.4278	0	-21.3392		0.6624	-3.06748	0.6625	-6.91324		0.28686	-4.02094	0.28683	-7.55293
0.91376	-21.1362	0.91154	-21.6932		0.32781	-21.5473	0.32798	-21.5417		0.32765	-21.427	0.04211	-21.3392		0.71382	-3.14062	0.71396	-6.88775		0.32784	-3.95411	0.3278	-7.46048
0.95688	-21.1358	0.95577	-21.6933		0.37417	-21.5472	0.37437	-21.5425		0.37398	-21.4271	0.08423	-21.3391		0.77496	-3.13399	0.77501	-6.92425		0.37419	-3.78404	0.37416	-7.54148
1	-21.1357	1	-21.6934		0.42053	-21.5468	0.42077	-21.544		0.42032	-21.4269	0.12634	-21.3384		0.8361	-3.12992	0.83607	-6.90673		0.42053	-3.40718	0.42052	-7.70655
0	--	0	--		0.46688	-21.547	0.46716	-21.5435		0.46666	-21.4265	0.16845	-21.3385		0.89074	-2.99226	0.89071	-6.96801		0.46688	-3.95177	0.46688	-7.91002
0	-21.1356	0	-21.6933		0.51324	-21.5469	0.51355	-21.544		0.51299	-21.426	0.22124	-21.3386		0.94537	-2.83452	0.94536	-6.75666		0.51323	-4.43992	0.51324	-8.06022
0.04312	-21.1358	0.04423	-21.6932		0.5596	-21.5463	0.55994	-21.5437		0.55933	-21.426	0.27403	-21.3389		1	-3.19644	1	-6.67992		0.55958	-4.62926	0.5596	-8.11484
0.08624	-21.1362	0.08846	-21.6931		0.61106	-21.5471	0.61144	-21.5441		0.61076	-21.4261	0.32682	-21.3391		0	--	0	--		0.61103	-4.39833	0.61106	-8.04784
0.12936	-21.1369	0.13269	-21.693		0.66252	-21.5468	0.66293	-21.5436		0.6622	-21.4266	0.37306	-21.338		0	-2.72677	0	-6.67816		0.66247	-3.81817	0.66252	-7.86779
0.17972	-21.1363	0.18222	-21.6935		0.71398	-21.547	0.71443	-21.5435		0.71363	-21.427	0.4193	-21.3387		0.05463	-2.82481	0.05464	-6.72571		0.71392	-3.50362	0.71398	-7.63945
0.23009	-21.1352	0.23176	-21.6937		0.75468	-21.548	0.75531	-21.5437		0.75419	-21.4278	0.46554	-21.3394		0.10926	-2.99073	0.10929	-6.83133		0.75464	-3.53517	0.75469	-7.75735
0.28045	-21.1338	0.28129	-21.6935		0.79539	-21.5489	0.79619	-21.5445		0.79475	-21.4285	0.51178	-21.3393		0.1639	-2.85072	0.16393	-6.88938		0.79536	-3.53989	0.79539	-7.80549
0.33082	-21.1322	0.33083	-21.6934		0.8361	-21.5496	0.83707	-21.5449		0.8353	-21.429	0.55802	-21.3392		0.21857	-2.83299	0.21856	-6.84		0.83608	-3.49648	0.8361	-7.77467
0.3787	-21.1333	0.37852	-21.6936		0.87707	-21.5483	0.8778	-21.5444		0.87648	-21.428	0.60935	-21.3393		0.27324	-2.98355	0.27318	-6.83753		0.87706	-3.94344	0.87707	-7.91624
0.42658	-21.1341	0.42621	-21.6937		0.91805	-21.5471	0.91853	-21.5439		0.91765	-21.4271	0.66068	-21.3393		0.32791	-3.10378	0.32781	-6.81509		0.91804	-4.30175	0.91805	-8.02464
0.47447	-21.1347	0.47391	-21.6937		0.95902	-21.5468	0.95927	-21.5439		0.95883	-21.4262	0.71201	-21.3387		0.38582	-3.08437	0.38575	-6.81923		0.95902	-4.54224	0.95902	-8.09184
0.52235	-21.1352	0.5216	-21.6937		1	-21.5463	1	-21.5437		1	-21.426	0.75185	-21.3382		0.44373	-3.08662	0.4437	-6.83068		1	-4.62926	1	-8.11484
0.57023	-21.1356	0.56929	-21.6933		0	--	0	--		0	--	0.7917	-21.3387		0.50164	-2.91603	0.50164	-6.76156		0	--	0	--
0.62338	-21.1352	0.62223	-21.6937		0	-21.5463	0	-21.5431		0	-21.4256	0.83155	-21.3385		0.55955	-2.72677	0.55959	-6.67816		0	-3.37957	0	-8.1146
0.67654	-21.1346	0.67517	-21.6937		0.04098	-21.546	0.04073	-21.543		0.04117	-21.426	0.87366	-21.3384		0.61098	-2.88582	0.61105	-6.74416		0.04098	-3.30584	0.04098	-8.0567
0.72969	-21.1338	0.72811	-21.6937		0.08195	-21.5471	0.08147	-21.5438		0.08235	-21.4258	0.91577	-21.3391		0.6624	-3.06729	0.6625	-6.8396		0.08196	-3.25065	0.08195	-7.88275
0.77667	-21.1351	0.77451	-21.6935		0.12293	-21.5464	0.1222	-21.5439		0.12352	-21.4256	0.95789	-21.3392		0.71382	-3.14055	0.71396	-6.80609		0.12294	-3.29839	0.12293	-7.62353
0.82366	-21.1361	0.82091	-21.6934		0.1639	-21.5457	0.16293	-21.5436		0.1647	-21.4253	1	-21.3392		0.77496	-2.91909	0.77501	-6.8057		0.16392	-3.49448	0.1639	-7.77378
0.87064	-21.1369	0.86731	-21.693		0.20488	-21.5456	0.20419	-21.5434		0.20544	-21.4251	0	--		0.8361	-2.85072	0.83607	-6.88938		0.2049	-3.2548	0.20488	-7.73955
0.91376	-21.1362	0.91154	-21.6931		0.24586	-21.5458	0.24546	-21.5428		0.24617	-21.4252	0	-21.3387		0.89074	-2.99073	0.89071	-6.83133		0.24588	-3.34728	0.24585	-7.65404
0.95688	-21.1358	0.95577	-21.6932		0.28683	-21.5465	0.28672	-21.5419		0.28691	-21.4261	0.04211	-21.3391		0.94537	-2.82481	0.94536	-6.72571		0.28686	-3.70847	0.28683	-7.54406
1	-21.1356	1	-21.6933		0.32781	-21.5473	0.32798	-21.5417		0.32765	-21.427	0.08423	-21.3386		1	-2.72677	1	-6.67816		0.32784	-3.9226	0.3278	-7.45655
0	--	0	--		0.37417	-21.5472	0.37437	-21.5421		0.37398	-21.4266	0.12634	-21.338		0	--	0	--		0.37419	-3.74739	0.37416	-7.53869
0	-21.1282	0	-21.6933		0.42053	-21.5468	0.42077	-21.5426		0.42032	-21.426	0.16845	-21.3384		0	-2.72391	0	-6.64148		0.42053	-3.32805	0.42052	-7.7049
0.04312	-21.1281	0.04423	-21.6932		0.46688	-21.5464	0.46716	-21.5433		0.46666	-21.4255	0.22124	-21.3385		0.05463	-2.82244	0.05464	-6.71746		0.46688	-3.26772	0.46688	-7.90911
0.08624	-21.1278	0.08846	-21.6931		0.51324	-21.5463	0.51355	-21.5429		0.51299	-21.4259	0.27403	-21.3389		0.10926	-2.49559	0.10929	-6.73006		0.51323	-3.35119	0.51324	-8.05968
0.12936	-21.1274	0.13269	-21.693		0.5596	-21.5463	0.55994	-21.5431		0.55933	-21.4256	0.32682	-21.3391		0.1639	-2.85072	0.16393	-6.88938		0.55958	-3.37957	0.5596	-8.1146
0.17972	-21.1279	0.18222	-21.6931		0.61106	-21.5463	0.61144	-21.5429		0.61076	-21.4258	0.37306	-21.3378		0.21857	-2.82969	0.21856	-6.8387		0.61103	-3.34467	0.61106	-8.04727
0.23009	-21.129	0.23176	-21.6932		0.66252	-21.5465	0.66293	-21.5434		0.6622	-21.4255	0.4193	-21.3384		0.27324	-2.9787	0.27318	-6.83673		0.66247	-3.24426	0.66252	-7.86677
0.28045	-21.1305	0.28129	-21.6933		0.71398	-21.547	0.71443	-21.5423		0.71363	-21.4262	0.46554	-21.3389		0.32791	-3.10377	0.32781	-6.81507		0.71392	-3.49475	0.71398	-7.6371
0.33082	-21.1322	0.33083	-21.6934		0.75468	-21.5461	0.75531	-21.5437		0.75419	-21.4251	0.51178	-21.3389		0.38582	-2.88428	0.38575	-6.79754		0.75464	-3.30221	0.75469	-7.59906
0.3787	-21.1309	0.37852	-21.6931		0.79539	-21.546	0.79619	-21.5438		0.79475	-21.4253	0.55802	-21.3387		0.44373	-2.71815	0.4437	-6.74824		0.79536	-3.40601	0.79539	-7.68805
0.42658	-21.1297	0.42621	-21.693		0.8361	-21.5457	0.83707	-21.5436		0.8353	-21.4253	0.60935	-21.339		0.50164	-2.7172	0.50164	-6.68426		0.83608	-3.49448	0.8361	-7.77378
0.47447	-21.1288	0.47391	-21.693		0.87707	-21.5464	0.8778	-21.5439		0.87648	-21.4256	0.66068	-21.3388		0.55955	-2.72391	0.55959	-6.64148		0.87706	-3.29839	0.87707	-7.62353
0.52235	-21.1283	0.5216	-21.6931		0.91805	-21.5471	0.91853	-21.5438		0.91765	-21.4258	0.71201	-21.3383		0.61098	-2.71836	0.61105	-6.67737		0.91804	-3.25065	0.91805	-7.88275
0.57023	-21.1282	0.56929	-21.6933		0.95902	-21.546	0.95927	-21.543		0.95883	-21.426	0.75185	-21.3381		0.6624	-2.71429	0.6625	-6.73431		0.95902	-3.30584	0.95902	-8.0567
0.62338	-21.1284	0.62223	-21.6931		1	-21.5463	1	-21.5431		1	-21.4256	0.7917	-21.3377		0.71382	-2.76071	0.71396	-6.78537		1	-3.37957	1	-8.1146
0.67654	-21.129	0.67517	-21.693		0	--	0	--		0	--	0.83155	-21.3384		0.77496	-2.77707	0.77501	-6.80289		0	--	0	--
0.72969	-21.13	0.72811	-21.693		0	-21.5462	0	-21.5424		0	-21.4254	0.87366	-21.338		0.8361	-2.85072	0.83607	-6.88938		0	-3.37745	0	-8.11446
0.77667	-21.1288	0.77451	-21.6934		0.04098	-21.5459	0.04073	-21.5429		0.04117	-21.425	0.91577	-21.3386		0.89074	-2.49559	0.89071	-6.73006		0.04098	-3.30389	0.04098	-8.04465
0.82366	-21.1279	0.82091	-21.6932		0.08195	-21.5452	0.08147	-21.543		0.08235	-21.4248	0.95789	-21.3391		0.94537	-2.82244	0.94536	-6.71746		0.08196	-3.10011	0.08195	-7.85974
0.87064	-21.1274	0.86731	-21.693		0.12293	-21.5451	0.1222	-21.5435		0.12352	-21.4249	1	-21.3387		1	-2.72391	1	-6.64148		0.12294	-3.16077	0.12293	-7.60817
0.91376	-21.1278	0.91154	-21.6931		0.1639	-21.5457	0.16293	-21.5436		0.1647	-21.4253	0	--		0	--	0	--		0.16392	-3.4939	0.1639	-7.77206
0.95688	-21.1281	0.95577	-21.6932		0.20488	-21.5456	0.20419	-21.5434		0.20544	-21.4251	0	-21.3386		0	-2.43172	0	-6.64106		0.2049	-3.24022	0.20488	-7.73417
1	-21.1282	1	-21.6933		0.24586	-21.5458	0.24546	-21.5428		0.24617	-21.4252	0.04211	-21.3383		0.05463	-2.52637	0.05464	-6.66675		0.24588	-3.34335	0.24585	-7.64218
0	--	0	--		0.28683	-21.5465	0.28672	-21.5419		0.28691	-21.4261	0.08423	-21.3376		0.10926	-2.44268	0.10929	-6.72291		0.28686	-3.70409	0.28683	-7.52579
0	-21.1266	0	-21.6933		0.32781	-21.5473	0.32798	-21.5417		0.32765	-21.427	0.12634	-21.3378		0.1639	-2.32467	0.16393	-6.77901		0.32784	-3.91735	0.3278	-7.44097
0.04312	-21.1267	0.04423	-21.6931		0.37417	-21.5463	0.37437	-21.5415		0.37398	-21.4259	0.16845	-21.3369		0.21857	-2.6693	0.21856	-6.78031		0.37419	-3.67559	0.37416	-7.51862
0.08624	-21.127	0.08846	-21.6929		0.42053	-21.5463	0.42077	-21.5424		0.42032	-21.4252	0.22124	-21.3368		0.27324	-2.77097	0.27318	-6.78675		0.42053	-3.31348	0.42052	-7.67928
0.12936	-21.1274	0.13269	-21.693		0.46688	-21.5464	0.46716	-21.5426		0.46666	-21.4254	0.27403	-21.3366		0.32791	-2.60645	0.32781	-6.68726		0.46688	-3.23806	0.46688	-7.89074
0.17972	-21.1279	0.18222	-21.6931		0.51324	-21.5458	0.51355	-21.5426		0.51299	-21.425	0.32682	-21.3365		0.38582	-2.81045	0.38575	-6.79723		0.51323	-3.22128	0.51324	-8.05006
0.23009	-21.129	0.23176	-21.6932		0.5596	-21.5462	0.55994	-21.5424		0.55933	-21.4254	0.37306	-21.3376		0.44373	-2.37225	0.4437	-6.74764		0.55958	-3.37745	0.5596	-8.11446
0.28045	-21.1305	0.28129	-21.6933		0.61106	-21.5459	0.61144	-21.5426		0.61076	-21.425	0.4193	-21.338		0.50164	-2.32858	0.50164	-6.68345		0.61103	-3.18678	0.61106	-8.03663
0.33082	-21.1322	0.33083	-21.6934		0.66252	-21.5465	0.66293	-21.5426		0.6622	-21.4254	0.46554	-21.3381		0.55955	-2.43172	0.55959	-6.64106		0.66247	-3.2422	0.66252	-7.84666
0.3787	-21.1308	0.37852	-21.6931		0.71398	-21.5461	0.71443	-21.5423		0.71363	-21.4254	0.51178	-21.3384		0.61098	-2.36633	0.61105	-6.67656		0.71392	-3.46559	0.71398	-7.6095
0.42658	-21.1294	0.42621	-21.6929		0.75468	-21.5459	0.75531	-21.5428		0.75419	-21.4251	0.55802	-21.3386		0.6624	-2.2391	0.6625	-6.73364		0.75464	-3.2747	0.75469	-7.5832
0.47447	-21.128	0.47391	-21.6929		0.79539	-21.5453	0.79619	-21.5431		0.79475	-21.425	0.60935	-21.3384		0.71382	-2.73099	0.71396	-6.78394		0.79536	-3.2741	0.79539	-7.67932
0.52235	-21.1269	0.5216	-21.6931		0.8361	-21.5457	0.83707	-21.5436		0.8353	-21.4253	0.66068	-21.3379		0.77496	-2.52585	0.77501	-6.80236		0.83608	-3.4939	0.8361	-7.77206
0.57023	-21.1266	0.56929	-21.6933		0.87707	-21.5451	0.8778	-21.5435		0.87648	-21.4249	0.71201	-21.3377		0.8361	-2.32467	0.83607	-6.77901		0.87706	-3.16077	0.87707	-7.60817
0.62338	-21.127	0.62223	-21.6931		0.91805	-21.5452	0.91853	-21.543		0.91765	-21.4248	0.75185	-21.3377		0.89074	-2.44268	0.89071	-6.72291		0.91804	-3.10011	0.91805	-7.85974
0.67654	-21.1283	0.67517	-21.6929		0.95902	-21.5459	0.95927	-21.5429		0.95883	-21.425	0.7917	-21.3376		0.94537	-2.52637	0.94536	-6.66675		0.95902	-3.30389	0.95902	-8.04465
0.72969	-21.1299	0.72811	-21.6929		1	-21.5462	1	-21.5424		1	-21.4254	0.83155	-21.3369		1	-2.43172	1	-6.64106		1	-3.37745	1	-8.11446
0.77667	-21.1286	0.77451	-21.6934		0	--	0	--		0	--	0.87366	-21.3378		0	--	0	--		0	--	0	--
0.82366	-21.1277	0.82091	-21.6932		0	-21.5453	0	-21.5424		0	-21.4244	0.91577	-21.3376		0	-2.43091	0	-6.50415		0	-3.09835	0	-7.45877
0.87064	-21.1274	0.86731	-21.693		0.04098	-21.5459	0.04073	-21.5425		0.04117	-21.4243	0.95789	-21.3383		0.05463	-2.24671	0.05464	-6.57024		0.04098	-3.15397	0.04098	-7.56364
0.91376	-21.127	0.91154	-21.6929		0.08195	-21.5452	0.08147	-21.5426		0.08235	-21.4241	1	-21.3386		0.10926	-2.17129	0.10929	-6.71174		0.08196	-3.09853	0.08195	-7.58263
0.95688	-21.1267	0.95577	-21.6931		0.12293	-21.5445	0.1222	-21.543		0.12352	-21.4238	0	--		0.1639	-2.32467	0.16393	-6.779		0.12294	-2.98748	0.12293	-7.6071
1	-21.1266	1	-21.6933		0.1639	-21.5443	0.16293	-21.5431		0.1647	-21.4236	0	-21.337		0.21857	-2.65785	0.21856	-6.78027		0.16392	-3.27193	0.1639	-7.31423
0	--	0	--		0.20488	-21.5451	0.20419	-21.5429		0.20544	-21.4244	0.04211	-21.3371		0.27324	-2.76474	0.27318	-6.78663		0.2049	-3.15649	0.20488	-7.32053
0	-21.1264	0	-21.693		0.24586	-21.5454	0.24546	-21.5422		0.24617	-21.4247	0.08423	-21.3376		0.32791	-2.60644	0.32781	-6.68725		0.24588	-3.19305	0.24585	-7.34258
0.04312	-21.1265	0.04423	-21.693		0.28683	-21.545	0.28672	-21.5413		0.28691	-21.4242	0.12634	-21.3374		0.38582	-2.33294	0.38575	-6.79719		0.28686	-3.09846	0.28683	-7.38721
0.08624	-21.1263	0.08846	-21.6928		0.32781	-21.5443	0.32798	-21.5409		0.32765	-21.4234	0.16845	-21.3368		0.44373	-2.19023	0.4437	-6.57412		0.32784	-3.00292	0.3278	-7.44054
0.12936	-21.1261	0.13269	-21.693		0.37417	-21.5454	0.37437	-21.5413		0.37398	-21.4242	0.22124	-21.3367		0.50164	-2.32785	0.50164	-6.51997		0.37419	-3.13379	0.37416	-7.51251
0.17972	-21.1266	0.18222	-21.6931		0.42053	-21.5461	0.42077	-21.5415		0.42032	-21.425	0.27403	-21.3365		0.55955	-2.43091	0.55959	-6.50415		0.42053	-3.28941	0.42052	-7.54778
0.23009	-21.1279	0.23176	-21.6931		0.46688	-21.5462	0.46716	-21.5424		0.46666	-21.4248	0.32682	-21.3364		0.61098	-2.3656	0.61105	-6.51665		0.46688	-3.16521	0.46688	-7.53491
0.28045	-21.13	0.28129	-21.6933		0.51324	-21.5458	0.51355	-21.5425		0.51299	-21.4248	0.37306	-21.3376		0.6624	-2.17914	0.6625	-6.55834		0.51323	-3.16208	0.51324	-7.54092
0.33082	-21.1322	0.33083	-21.6933		0.5596	-21.5453	0.55994	-21.5424		0.55933	-21.4244	0.4193	-21.3375		0.71382	-2.25301	0.71396	-6.78353		0.55958	-3.09835	0.5596	-7.45877
0.3787	-21.1304	0.37852	-21.6929		0.61106	-21.5458	0.61144	-21.5426		0.61076	-21.4248	0.46554	-21.3376		0.77496	-2.49221	0.77501	-6.75528		0.61103	-3.1728	0.61106	-7.54529
0.42658	-21.1288	0.42621	-21.6925		0.66252	-21.5461	0.66293	-21.5422		0.6622	-21.4249	0.51178	-21.3371		0.8361	-2.32467	0.83607	-6.779		0.66247	-3.2141	0.66252	-7.52051
0.47447	-21.1275	0.47391	-21.692		0.71398	-21.546	0.71443	-21.5413		0.71363	-21.4247	0.55802	-21.337		0.89074	-2.17129	0.89071	-6.71174		0.71392	-3.20757	0.71398	-7.56097
0.52235	-21.1267	0.5216	-21.6925		0.75468	-21.5458	0.75531	-21.5423		0.75419	-21.4249	0.60935	-21.3371		0.94537	-2.24671	0.94536	-6.57024		0.75464	-3.23815	0.75469	-7.56858
0.57023	-21.1264	0.56929	-21.693		0.79539	-21.5451	0.79619	-21.5431		0.79475	-21.4243	0.66068	-21.3377		1	-2.43091	1	-6.50415		0.79536	-3.21092	0.79539	-7.44873
0.62338	-21.1267	0.62223	-21.6924		0.8361	-21.5443	0.83707	-21.5431		0.8353	-21.4236	0.71201	-21.3372		0	--	0	--		0.83608	-3.27193	0.8361	-7.31423
0.67654	-21.1277	0.67517	-21.6922		0.87707	-21.5445	0.8778	-21.543		0.87648	-21.4238	0.75185	-21.3372		0	-2.4309	0	-6.49949		0.87706	-2.98748	0.87707	-7.6071
0.72969	-21.1293	0.72811	-21.6927		0.91805	-21.5452	0.91853	-21.5426		0.91765	-21.4241	0.7917	-21.3371		0.05463	-2.24235	0.05464	-6.54415		0.91804	-3.09853	0.91805	-7.58263
0.77667	-21.1276	0.77451	-21.6928		0.95902	-21.5459	0.95927	-21.5425		0.95883	-21.4243	0.83155	-21.3368		0.10926	-2.02219	0.10929	-6.6988		0.95902	-3.15397	0.95902	-7.56364
0.82366	-21.1265	0.82091	-21.6929		1	-21.5453	1	-21.5424		1	-21.4244	0.87366	-21.3374		0.1639	-2.05129	0.16393	-6.62714		1	-3.09835	1	-7.45877
0.87064	-21.1261	0.86731	-21.693		0	--	0	--		0	--	0.91577	-21.3376		0.21857	-1.84878	0.21856	-6.74395		0	--	0	--
0.91376	-21.1263	0.91154	-21.6928		0	-21.5453	0	-21.5423		0	-21.4244	0.95789	-21.3371		0.27324	-2.24682	0.27318	-6.72812		0	-2.92807	0	-7.42377
0.95688	-21.1265	0.95577	-21.693		0.04098	-21.5452	0.04073	-21.5424		0.04117	-21.4243	1	-21.337		0.32791	-2.59899	0.32781	-6.68655		0.04098	-2.89715	0.04098	-7.40166
1	-21.1264	1	-21.693		0.08195	-21.5449	0.08147	-21.5425		0.08235	-21.424	0	--		0.38582	-2.33263	0.38575	-6.65073		0.08196	-2.99127	0.08195	-7.44308
0	--	0	--		0.12293	-21.5445	0.1222	-21.5427		0.12352	-21.4237	0	-21.3369		0.44373	-1.95855	0.4437	-6.57233		0.12294	-2.98464	0.12293	-7.58583
0	-21.1264	0	-21.693		0.1639	-21.5443	0.16293	-21.5431		0.1647	-21.4236	0.04211	-21.3367		0.50164	-2.22478	0.50164	-6.51723		0.16392	-3.25815	0.1639	-7.29382
0.04312	-21.1262	0.04423	-21.6929		0.20488	-21.5451	0.20419	-21.5428		0.20544	-21.4243	0.08423	-21.3363		0.55955	-2.4309	0.55959	-6.49949		0.2049	-3.15053	0.20488	-7.30031
0.08624	-21.1261	0.08846	-21.6928		0.24586	-21.5454	0.24546	-21.5422		0.24617	-21.4247	0.12634	-21.3367		0.61098	-2.25382	0.61105	-6.51375		0.24588	-3.17938	0.24585	-7.32317
0.12936	-21.1261	0.13269	-21.693		0.28683	-21.5449	0.28672	-21.5413		0.28691	-21.4241	0.16845	-21.3365		0.6624	-2.00982	0.6625	-6.55637		0.28686	-3.08706	0.28683	-7.37032
0.17972	-21.1266	0.18222	-21.6931		0.32781	-21.5443	0.32798	-21.5409		0.32765	-21.4234	0.22124	-21.3364		0.71382	-2.18662	0.71396	-6.62618		0.32784	-3.00225	0.3278	-7.42325
0.23009	-21.1279	0.23176	-21.6931		0.37417	-21.5443	0.37437	-21.5411		0.37398	-21.4238	0.27403	-21.3363		0.77496	-1.95426	0.77501	-6.75191		0.37419	-3.02659	0.37416	-7.48771
0.28045	-21.1299	0.28129	-21.6933		0.42053	-21.5443	0.42077	-21.5414		0.42032	-21.4242	0.32682	-21.3363		0.8361	-2.05129	0.83607	-6.62714		0.42053	-3.22717	0.42052	-7.53115
0.33082	-21.1322	0.33083	-21.6933		0.46688	-21.5445	0.46716	-21.5418		0.46666	-21.4246	0.37306	-21.337		0.89074	-2.02219	0.89071	-6.6988		0.46688	-2.90084	0.46688	-7.51717
0.3787	-21.1304	0.37852	-21.6929		0.51324	-21.5455	0.51355	-21.5422		0.51299	-21.4245	0.4193	-21.3368		0.94537	-2.24235	0.94536	-6.54415		0.51323	-2.99184	0.51324	-7.51434
0.42658	-21.1287	0.42621	-21.6924		0.5596	-21.5453	0.55994	-21.5423		0.55933	-21.4244	0.46554	-21.3363		1	-2.4309	1	-6.49949		0.55958	-2.92807	0.5596	-7.42377
0.47447	-21.1273	0.47391	-21.6919		0.61106	-21.5453	0.61144	-21.5422		0.61076	-21.4245	0.51178	-21.3368		0	--	0	--		0.61103	-3.00618	0.61106	-7.51967
0.52235	-21.1264	0.5216	-21.6924		0.66252	-21.5444	0.66293	-21.5418		0.6622	-21.4245	0.55802	-21.3369		0	-2.43033	0	-6.47521		0.66247	-2.92911	0.66252	-7.50469
0.57023	-21.1264	0.56929	-21.693		0.71398	-21.5443	0.71443	-21.5413		0.71363	-21.4241	0.60935	-21.3367		0.05463	-2.23255	0.05464	-6.46612		0.71392	-3.10926	0.71398	-7.54148
0.62338	-21.1264	0.62223	-21.6923		0.75468	-21.5449	0.75531	-21.542		0.75419	-21.4246	0.66068	-21.3362		0.10926	-1.92389	0.10929	-6.4221		0.75464	-3.12279	0.75469	-7.53709
0.67654	-21.1275	0.67517	-21.6921		0.79539	-21.545	0.79619	-21.5427		0.79475	-21.4243	0.71201	-21.3372		0.1639	-2.05129	0.16393	-6.62714		0.79536	-2.98228	0.79539	-7.41196
0.72969	-21.1292	0.72811	-21.6926		0.8361	-21.5443	0.83707	-21.5431		0.8353	-21.4236	0.75185	-21.3371		0.21857	-1.84839	0.21856	-6.74359		0.83608	-3.25815	0.8361	-7.29382
0.77667	-21.1275	0.77451	-21.6928		0.87707	-21.5445	0.8778	-21.5427		0.87648	-21.4237	0.7917	-21.3366		0.27324	-2.24235	0.27318	-6.72624		0.87706	-2.98464	0.87707	-7.58583
0.82366	-21.1265	0.82091	-21.6929		0.91805	-21.5449	0.91853	-21.5425		0.91765	-21.424	0.83155	-21.3365		0.32791	-2.59898	0.32781	-6.68654		0.91804	-2.99127	0.91805	-7.44308
0.87064	-21.1261	0.86731	-21.693		0.95902	-21.5452	0.95927	-21.5424		0.95883	-21.4243	0.87366	-21.3367		0.38582	-2.30882	0.38575	-6.64973		0.95902	-2.89715	0.95902	-7.40166
0.91376	-21.1261	0.91154	-21.6928		1	-21.5453	1	-21.5423		1	-21.4244	0.91577	-21.3363		0.44373	-1.95835	0.4437	-6.5371		1	-2.92807	1	-7.42377
0.95688	-21.1262	0.95577	-21.6929		0	--	0	--		0	--	0.95789	-21.3367		0.50164	-2.22428	0.50164	-6.46724		0	--	0	--
1	-21.1264	1	-21.693		0	-21.5452	0	-21.5418		0	-21.4243	1	-21.3369		0.55955	-2.43033	0.55959	-6.47521		0	-2.92117	0	-7.42364
0	--	0	--		0.04098	-21.5451	0.04073	-21.5421		0.04117	-21.4242	0	--		0.61098	-2.25331	0.61105	-6.46758		0.04098	-2.86109	0.04098	-7.4005
0	-21.1261	0	-21.693		0.08195	-21.5448	0.08147	-21.5424		0.08235	-21.424	0	-21.3369		0.6624	-2.00954	0.6625	-6.47408		0.08196	-2.81382	0.08195	-7.44263
0.04312	-21.1261	0.04423	-21.6929		0.12293	-21.5445	0.1222	-21.5419		0.12352	-21.4237	0.04211	-21.3366		0.71382	-2.18624	0.71396	-6.62489		0.12294	-2.81636	0.12293	-7.48515
0.08624	-21.1261	0.08846	-21.6928		0.1639	-21.5442	0.16293	-21.5414		0.1647	-21.4235	0.08423	-21.3361		0.77496	-1.80666	0.77501	-6.65558		0.16392	-2.58701	0.1639	-7.29046
0.12936	-21.126	0.13269	-21.6927		0.20488	-21.5435	0.20419	-21.5412		0.20544	-21.4229	0.12634	-21.3365		0.8361	-2.05129	0.83607	-6.62714		0.2049	-2.89066	0.20488	-7.28494
0.17972	-21.1257	0.18222	-21.6918		0.24586	-21.5433	0.24546	-21.5407		0.24617	-21.4226	0.16845	-21.3365		0.89074	-1.92389	0.89071	-6.4221		0.24588	-2.91523	0.24585	-7.30366
0.23009	-21.1253	0.23176	-21.6905		0.28683	-21.5439	0.28672	-21.5404		0.28691	-21.4229	0.22124	-21.3364		0.94537	-2.23255	0.94536	-6.46612		0.28686	-2.93723	0.28683	-7.35053
0.28045	-21.1247	0.28129	-21.6891		0.32781	-21.5443	0.32798	-21.5409		0.32765	-21.4234	0.27403	-21.3363		1	-2.43033	1	-6.47521		0.32784	-2.96849	0.3278	-7.40804
0.33082	-21.1242	0.33083	-21.6888		0.37417	-21.5443	0.37437	-21.541		0.37398	-21.4232	0.32682	-21.3363		0	--	0	--		0.37419	-2.99082	0.37416	-7.31352
0.3787	-21.1247	0.37852	-21.6891		0.42053	-21.5443	0.42077	-21.5414		0.42032	-21.4232	0.37306	-21.3367		0	-2.16067	0	-6.47364		0.42053	-3.13232	0.42052	-7.44044
0.42658	-21.1254	0.42621	-21.6902		0.46688	-21.5445	0.46716	-21.5417		0.46666	-21.4234	0.4193	-21.3361		0.05463	-2.03198	0.05464	-6.38223		0.46688	-2.86216	0.46688	-7.45222
0.47447	-21.126	0.47391	-21.6914		0.51324	-21.5448	0.51355	-21.5419		0.51299	-21.4241	0.46554	-21.3361		0.10926	-1.79806	0.10929	-6.36461		0.51323	-2.74717	0.51324	-7.32455
0.52235	-21.1264	0.5216	-21.6924		0.5596	-21.5452	0.55994	-21.5418		0.55933	-21.4243	0.51178	-21.3367		0.1639	-1.63581	0.16393	-6.19494		0.55958	-2.92117	0.5596	-7.42364
0.57023	-21.1261	0.56929	-21.693		0.61106	-21.5448	0.61144	-21.5419		0.61076	-21.4241	0.55802	-21.3369		0.21857	-1.65389	0.21856	-6.28087		0.61103	-2.76595	0.61106	-7.33731
0.62338	-21.1264	0.62223	-21.6923		0.66252	-21.5444	0.66293	-21.5416		0.6622	-21.4233	0.60935	-21.3366		0.27324	-1.57679	0.27318	-6.47908		0.66247	-2.89103	0.66252	-7.47875
0.67654	-21.1259	0.67517	-21.6912		0.71398	-21.5443	0.71443	-21.5412		0.71363	-21.4231	0.66068	-21.336		0.32791	-1.53726	0.32781	-6.50853		0.71392	-3.07788	0.71398	-7.39796
0.72969	-21.1252	0.72811	-21.6898		0.75468	-21.5438	0.75531	-21.5414		0.75419	-21.4229	0.71201	-21.3366		0.38582	-1.66021	0.38575	-6.49828		0.75464	-3.11684	0.75469	-7.41762
0.77667	-21.1256	0.77451	-21.6909		0.79539	-21.5438	0.79619	-21.5415		0.79475	-21.423	0.75185	-21.3366		0.44373	-1.84347	0.4437	-6.47823		0.79536	-2.90813	0.79539	-7.37748
0.82366	-21.1259	0.82091	-21.692		0.8361	-21.5442	0.83707	-21.5414		0.8353	-21.4235	0.7917	-21.336		0.50164	-2.16201	0.50164	-6.46496		0.83608	-2.58701	0.8361	-7.29046
0.87064	-21.126	0.86731	-21.6927		0.87707	-21.5445	0.8778	-21.5419		0.87648	-21.4237	0.83155	-21.3365		0.55955	-2.16067	0.55959	-6.47364		0.87706	-2.81636	0.87707	-7.48515
0.91376	-21.1261	0.91154	-21.6928		0.91805	-21.5448	0.91853	-21.5424		0.91765	-21.424	0.87366	-21.3365		0.61098	-2.16115	0.61105	-6.46529		0.91804	-2.81382	0.91805	-7.44263
0.95688	-21.1261	0.95577	-21.6929		0.95902	-21.5451	0.95927	-21.5421		0.95883	-21.4242	0.91577	-21.3361		0.6624	-1.93702	0.6625	-6.47217		0.95902	-2.86109	0.95902	-7.4005
1	-21.1261	1	-21.693		1	-21.5452	1	-21.5418		1	-21.4243	0.95789	-21.3366		0.71382	-1.74117	0.71396	-6.49202		1	-2.92117	1	-7.42364
0	--	0	--		0	--	0	--		0	--	1	-21.3369		0.77496	-1.75543	0.77501	-6.36994		0	--	0	--
0	-21.1243	0	-21.6929		0	-21.5452	0	-21.5418		0	-21.424	0	--		0.8361	-1.63581	0.83607	-6.19494		0	-2.57823	0	-7.38921
0.04312	-21.125	0.04423	-21.6928		0.04098	-21.5448	0.04073	-21.5415		0.04117	-21.424	0	-21.3343		0.89074	-1.79806	0.89071	-6.36461		0.04098	-2.78029	0.04098	-7.31299
0.08624	-21.1255	0.08846	-21.6927		0.08195	-21.5447	0.08147	-21.5409		0.08235	-21.4238	0.04211	-21.3349		0.94537	-2.03198	0.94536	-6.38223		0.08196	-2.69151	0.08195	-7.33267
0.12936	-21.126	0.13269	-21.6927		0.12293	-21.5445	0.1222	-21.541		0.12352	-21.4235	0.08423	-21.3359		1	-2.16067	1	-6.47364		0.12294	-2.8153	0.12293	-7.22046
0.17972	-21.1257	0.18222	-21.6918		0.1639	-21.5442	0.16293	-21.5414		0.1647	-21.4235	0.12634	-21.3353		0	--	0	--		0.16392	-2.58603	0.1639	-7.28836
0.23009	-21.1253	0.23176	-21.6905		0.20488	-21.5435	0.20419	-21.5412		0.20544	-21.4229	0.16845	-21.336		0	-2.15913	0	-5.99615		0.2049	-2.88769	0.20488	-7.28289
0.28045	-21.1247	0.28129	-21.6891		0.24586	-21.5433	0.24546	-21.5407		0.24617	-21.4226	0.22124	-21.336		0.05463	-2.02926	0.05464	-6.1515		0.24588	-2.90237	0.24585	-7.28358
0.33082	-21.1242	0.33083	-21.6888		0.28683	-21.5439	0.28672	-21.5404		0.28691	-21.4229	0.27403	-21.336		0.10926	-1.78927	0.10929	-6.21244		0.28686	-2.92476	0.28683	-7.33315
0.3787	-21.1244	0.37852	-21.6891		0.32781	-21.5443	0.32798	-21.5409		0.32765	-21.4234	0.32682	-21.3359		0.1639	-1.63581	0.16393	-6.19493		0.32784	-2.95626	0.3278	-7.40756
0.42658	-21.1246	0.42621	-21.6901		0.37417	-21.544	0.37437	-21.5406		0.37398	-21.4228	0.37306	-21.3353		0.21857	-1.63541	0.21856	-6.28047		0.37419	-2.94814	0.37416	-7.31051
0.47447	-21.1246	0.47391	-21.6913		0.42053	-21.5437	0.42077	-21.5411		0.42032	-21.4227	0.4193	-21.3356		0.27324	-1.574	0.27318	-6.47848		0.42053	-2.99778	0.42052	-7.43105
0.52235	-21.1246	0.5216	-21.6923		0.46688	-21.544	0.46716	-21.5416		0.46666	-21.4233	0.46554	-21.3356		0.32791	-1.53725	0.32781	-6.50851		0.46688	-2.82132	0.46688	-7.44366
0.57023	-21.1243	0.56929	-21.6929		0.51324	-21.5448	0.51355	-21.5418		0.51299	-21.4236	0.51178	-21.3347		0.38582	-1.65962	0.38575	-6.49738		0.51323	-2.74396	0.51324	-7.32214
0.62338	-21.1246	0.62223	-21.6922		0.5596	-21.5452	0.55994	-21.5418		0.55933	-21.424	0.55802	-21.3343		0.44373	-1.84291	0.4437	-6.47649		0.55958	-2.57823	0.5596	-7.38921
0.67654	-21.1246	0.67517	-21.6911		0.61106	-21.5447	0.61144	-21.5418		0.61076	-21.4236	0.60935	-21.3347		0.50164	-1.90892	0.50164	-6.17696		0.61103	-2.72596	0.61106	-7.33438
0.72969	-21.1245	0.72811	-21.6897		0.66252	-21.5436	0.66293	-21.5415		0.6622	-21.4233	0.66068	-21.3358		0.55955	-2.15913	0.55959	-5.99615		0.66247	-2.84347	0.66252	-7.46852
0.77667	-21.1251	0.77451	-21.6909		0.71398	-21.5438	0.71443	-21.5411		0.71363	-21.4226	0.71201	-21.3353		0.61098	-1.95224	0.61105	-6.14287		0.71392	-3.01448	0.71398	-7.39098
0.82366	-21.1256	0.82091	-21.692		0.75468	-21.5435	0.75531	-21.5404		0.75419	-21.4226	0.75185	-21.3353		0.6624	-1.93635	0.6625	-6.4523		0.75464	-3.03023	0.75469	-7.36252
0.87064	-21.126	0.86731	-21.6927		0.79539	-21.5435	0.79619	-21.541		0.79475	-21.423	0.7917	-21.336		0.71382	-1.74053	0.71396	-6.49084		0.79536	-2.83625	0.79539	-7.24682
0.91376	-21.1255	0.91154	-21.6927		0.8361	-21.5442	0.83707	-21.5414		0.8353	-21.4235	0.83155	-21.336		0.77496	-1.74908	0.77501	-6.19469		0.83608	-2.58603	0.8361	-7.28836
0.95688	-21.125	0.95577	-21.6928		0.87707	-21.5445	0.8778	-21.541		0.87648	-21.4235	0.87366	-21.3353		0.8361	-1.63581	0.83607	-6.19493		0.87706	-2.8153	0.87707	-7.22046
1	-21.1243	1	-21.6929		0.91805	-21.5447	0.91853	-21.5409		0.91765	-21.4238	0.91577	-21.3359		0.89074	-1.78927	0.89071	-6.21244		0.91804	-2.69151	0.91805	-7.33267
0	--	0	--		0.95902	-21.5448	0.95927	-21.5415		0.95883	-21.424	0.95789	-21.3349		0.94537	-2.02926	0.94536	-6.1515		0.95902	-2.78029	0.95902	-7.31299
0	-21.1243	0	-21.6911		1	-21.5452	1	-21.5418		1	-21.424	1	-21.3343		1	-2.15913	1	-5.99615		1	-2.57823	1	-7.38921
0.04312	-21.1235	0.04423	-21.6918		0	--	0	--		0	--	0	--		0	--	0	--		0	--	0	--
0.08624	-21.1227	0.08846	-21.6925		0	-21.5433	0	-21.5417		0	-21.4219	0	-21.3341		0	-1.3615	0	-5.78915		0	-2.53903	0	-7.26213
0.12936	-21.1223	0.13269	-21.6927		0.04098	-21.5432	0.04073	-21.5412		0.04117	-21.4223	0.04211	-21.3344		0.05463	-1.62922	0.05464	-5.8185		0.04098	-2.54062	0.04098	-7.31274
0.17972	-21.1227	0.18222	-21.6918		0.08195	-21.5431	0.08147	-21.5407		0.08235	-21.4225	0.08423	-21.3353		0.10926	-1.77636	0.10929	-5.95768		0.08196	-2.59118	0.08195	-7.33151
0.23009	-21.1231	0.23176	-21.6905		0.12293	-21.5428	0.1222	-21.5396		0.12352	-21.4224	0.12634	-21.3352		0.1639	-1.51132	0.16393	-6.04242		0.12294	-2.67652	0.12293	-7.21935
0.28045	-21.1236	0.28129	-21.6891		0.1639	-21.5423	0.16293	-21.5384		0.1647	-21.422	0.16845	-21.3359		0.21857	-1.61852	0.21856	-6.10406		0.16392	-2.56636	0.1639	-7.27393
0.33082	-21.1241	0.33083	-21.6888		0.20488	-21.5427	0.20419	-21.5386		0.20544	-21.4222	0.22124	-21.3359		0.27324	-1.4939	0.27318	-6.27357		0.2049	-2.77364	0.20488	-7.28053
0.3787	-21.1238	0.37852	-21.689		0.24586	-21.5433	0.24546	-21.5393		0.24617	-21.4224	0.27403	-21.3359		0.32791	-1.53474	0.32781	-6.50705		0.24588	-2.83367	0.24585	-7.27144
0.42658	-21.1233	0.42621	-21.6899		0.28683	-21.5439	0.28672	-21.54		0.28691	-21.4225	0.32682	-21.3359		0.38582	-1.48326	0.38575	-6.37971		0.28686	-2.78503	0.28683	-7.25796
0.47447	-21.1231	0.47391	-21.6913		0.32781	-21.5441	0.32798	-21.5402		0.32765	-21.4224	0.37306	-21.3352		0.44373	-1.79981	0.4437	-6.03758		0.32784	-2.74894	0.3278	-7.25272
0.52235	-21.1237	0.5216	-21.6916		0.37417	-21.5438	0.37437	-21.5404		0.37398	-21.4226	0.4193	-21.3354		0.50164	-1.76435	0.50164	-5.82352		0.37419	-2.89311	0.37416	-7.26532
0.57023	-21.1243	0.56929	-21.6911		0.42053	-21.5428	0.42077	-21.541		0.42032	-21.4225	0.46554	-21.335		0.55955	-1.3615	0.55959	-5.78915		0.42053	-2.96232	0.42052	-7.03294
0.62338	-21.1237	0.62223	-21.6916		0.46688	-21.5435	0.46716	-21.5408		0.46666	-21.4224	0.51178	-21.3343		0.61098	-1.69855	0.61105	-5.81605		0.46688	-2.70068	0.46688	-6.98741
0.67654	-21.123	0.67517	-21.691		0.51324	-21.5434	0.51355	-21.5411		0.51299	-21.4222	0.55802	-21.3341		0.6624	-1.75078	0.6625	-5.96077		0.51323	-2.70703	0.51324	-7.24754
0.72969	-21.1234	0.72811	-21.6895		0.5596	-21.5433	0.55994	-21.5417		0.55933	-21.4219	0.60935	-21.3344		0.71382	-1.43645	0.71396	-6.26692		0.55958	-2.53903	0.5596	-7.26213
0.77667	-21.123	0.77451	-21.6908		0.61106	-21.5434	0.61144	-21.541		0.61076	-21.4222	0.66068	-21.3352		0.77496	-1.62795	0.77501	-6.17391		0.61103	-2.70478	0.61106	-7.22167
0.82366	-21.1227	0.82091	-21.6919		0.66252	-21.5436	0.66293	-21.5408		0.6622	-21.4224	0.71201	-21.3351		0.8361	-1.51132	0.83607	-6.04242		0.66247	-2.80434	0.66252	-6.92489
0.87064	-21.1223	0.86731	-21.6927		0.71398	-21.5432	0.71443	-21.541		0.71363	-21.4226	0.75185	-21.3352		0.89074	-1.77636	0.89071	-5.95768		0.71392	-2.9809	0.71398	-7.0975
0.91376	-21.1227	0.91154	-21.6925		0.75468	-21.5428	0.75531	-21.5401		0.75419	-21.4225	0.7917	-21.3359		0.94537	-1.62922	0.94536	-5.8185		0.75464	-2.86106	0.75469	-7.09922
0.95688	-21.1235	0.95577	-21.6918		0.79539	-21.5428	0.79619	-21.5391		0.79475	-21.4223	0.83155	-21.3359		1	-1.3615	1	-5.78915		0.79536	-2.75105	0.79539	-7.18154
1	-21.1243	1	-21.6911		0.8361	-21.5423	0.83707	-21.5384		0.8353	-21.422	0.87366	-21.3352		0	--	0	--		0.83608	-2.56636	0.8361	-7.27393
0	--	0	--		0.87707	-21.5428	0.8778	-21.5396		0.87648	-21.4224	0.91577	-21.3353		0	-1.33566	0	-5.57029		0.87706	-2.67652	0.87707	-7.21935
0	-21.1228	0	-21.6911		0.91805	-21.5431	0.91853	-21.5407		0.91765	-21.4225	0.95789	-21.3344		0.05463	-1.50954	0.05464	-5.70025		0.91804	-2.59118	0.91805	-7.33151
0.04312	-21.1227	0.04423	-21.6917		0.95902	-21.5432	0.95927	-21.5412		0.95883	-21.4223	1	-21.3341		0.10926	-1.77304	0.10929	-5.90504		0.95902	-2.54062	0.95902	-7.31274
0.08624	-21.1226	0.08846	-21.6924		1	-21.5433	1	-21.5417		1	-21.4219	0	--		0.1639	-1.51131	0.16393	-6.04242		1	-2.53903	1	-7.26213
0.12936	-21.1223	0.13269	-21.6927		0	--	0	--		0	--	0	-21.3337		0.21857	-1.61692	0.21856	-6.10355		0	--	0	--
0.17972	-21.1227	0.18222	-21.6918		0	-21.5433	0	-21.5412		0	-21.4217	0.04211	-21.3337		0.27324	-1.49348	0.27318	-6.2726		0	-2.53887	0	-7.26207
0.23009	-21.1231	0.23176	-21.6905		0.04098	-21.5428	0.04073	-21.5409		0.04117	-21.4212	0.08423	-21.3343		0.32791	-1.53473	0.32781	-6.50704		0.04098	-2.53972	0.04098	-7.18174
0.28045	-21.1236	0.28129	-21.6891		0.08195	-21.5418	0.08147	-21.5402		0.08235	-21.4208	0.12634	-21.3352		0.38582	-1.33043	0.38575	-6.16969		0.08196	-2.58943	0.08195	-6.86407
0.33082	-21.1241	0.33083	-21.6888		0.12293	-21.5418	0.1222	-21.5391		0.12352	-21.4215	0.16845	-21.3355		0.44373	-1.79917	0.4437	-5.94072		0.12294	-2.46699	0.12293	-7.03319
0.3787	-21.1236	0.37852	-21.689		0.1639	-21.5423	0.16293	-21.5384		0.1647	-21.422	0.22124	-21.3356		0.50164	-1.4013	0.50164	-5.71911		0.16392	-2.56219	0.1639	-7.25268
0.42658	-21.1232	0.42621	-21.6898		0.20488	-21.5427	0.20419	-21.5386		0.20544	-21.4221	0.27403	-21.3357		0.55955	-1.33566	0.55959	-5.57029		0.2049	-2.75279	0.20488	-7.25953
0.47447	-21.123	0.47391	-21.6912		0.24586	-21.5433	0.24546	-21.5393		0.24617	-21.4224	0.32682	-21.3358		0.61098	-1.35439	0.61105	-5.6903		0.24588	-2.82757	0.24585	-7.26949
0.52235	-21.1228	0.5216	-21.6914		0.28683	-21.5439	0.28672	-21.54		0.28691	-21.4225	0.37306	-21.3348		0.6624	-1.75067	0.6625	-5.90572		0.28686	-2.77028	0.28683	-7.2563
0.57023	-21.1228	0.56929	-21.6911		0.32781	-21.5441	0.32798	-21.5402		0.32765	-21.4224	0.4193	-21.3344		0.71382	-1.38293	0.71396	-6.07906		0.32784	-2.74562	0.3278	-7.25147
0.62338	-21.1229	0.62223	-21.6915		0.37417	-21.5437	0.37437	-21.5399		0.37398	-21.4222	0.46554	-21.3339		0.77496	-1.49039	0.77501	-6.0211		0.37419	-2.55726	0.37416	-7.2248
0.67654	-21.1229	0.67517	-21.6909		0.42053	-21.5426	0.42077	-21.5399		0.42032	-21.4216	0.51178	-21.3337		0.8361	-1.51131	0.83607	-6.04242		0.42053	-2.35185	0.42052	-7.02301
0.72969	-21.1234	0.72811	-21.6894		0.46688	-21.5417	0.46716	-21.5404		0.46666	-21.4208	0.55802	-21.3337		0.89074	-1.77304	0.89071	-5.90504		0.46688	-2.66229	0.46688	-6.93751
0.77667	-21.1229	0.77451	-21.6907		0.51324	-21.5426	0.51355	-21.5409		0.51299	-21.4212	0.60935	-21.3337		0.94537	-1.50954	0.94536	-5.70025		0.51323	-2.37926	0.51324	-7.20507
0.82366	-21.1226	0.82091	-21.6919		0.5596	-21.5433	0.55994	-21.5412		0.55933	-21.4217	0.66068	-21.334		1	-1.33566	1	-5.57029		0.55958	-2.53887	0.5596	-7.26207
0.87064	-21.1223	0.86731	-21.6927		0.61106	-21.5425	0.61144	-21.5409		0.61076	-21.4211	0.71201	-21.3347		0	--	0	--		0.61103	-2.36888	0.61106	-7.17837
0.91376	-21.1226	0.91154	-21.6924		0.66252	-21.5419	0.66293	-21.5403		0.6622	-21.421	0.75185	-21.335		0	-1.11254	0	-4.47396		0.66247	-2.71616	0.66252	-6.87342
0.95688	-21.1227	0.95577	-21.6917		0.71398	-21.543	0.71443	-21.5398		0.71363	-21.4219	0.7917	-21.3353		0.05463	-1.44367	0.05464	-4.44182		0.71392	-2.32397	0.71398	-7.09641
1	-21.1228	1	-21.6911		0.75468	-21.5427	0.75531	-21.5399		0.75419	-21.4219	0.83155	-21.3355		0.10926	-1.69895	0.10929	-4.34391		0.75464	-2.48193	0.75469	-7.08303
0	--	0	--		0.79539	-21.5423	0.79619	-21.5389		0.79475	-21.4219	0.87366	-21.3352		0.1639	-1.50834	0.16393	-4.18157		0.79536	-2.67591	0.79539	-7.1673
0	-21.1228	0	-21.6909		0.8361	-21.5423	0.83707	-21.5384		0.8353	-21.422	0.91577	-21.3343		0.21857	-1.39376	0.21856	-3.99454		0.83608	-2.56219	0.8361	-7.25268
0.04312	-21.1227	0.04423	-21.6901		0.87707	-21.5418	0.8778	-21.5391		0.87648	-21.4215	0.95789	-21.3337		0.27324	-1.16474	0.27318	-3.76611		0.87706	-2.46699	0.87707	-7.03319
0.08624	-21.1225	0.08846	-21.6892		0.91805	-21.5418	0.91853	-21.5402		0.91765	-21.4208	1	-21.3337		0.32791	-0.84859	0.32781	-3.56616		0.91804	-2.58943	0.91805	-6.86407
0.12936	-21.1223	0.13269	-21.6886		0.95902	-21.5428	0.95927	-21.5409		0.95883	-21.4212	0	--		0.38582	-1.18754	0.38575	-3.84839		0.95902	-2.53972	0.95902	-7.18174
0.17972	-21.122	0.18222	-21.6888		1	-21.5433	1	-21.5412		1	-21.4217	0	-21.3335		0.44373	-1.4854	0.4437	-4.0758		1	-2.53887	1	-7.26207
0.23009	-21.1218	0.23176	-21.689		0	--	0	--		0	--	0.04211	-21.3337		0.50164	-1.40125	0.50164	-4.37223		0	--	0	--
0.28045	-21.1217	0.28129	-21.6888		0	-21.5407	0	-21.5405		0	-21.4196	0.08423	-21.3342		0.55955	-1.11254	0.55959	-4.47396		0	-2.49886	0	-6.48488
0.33082	-21.1216	0.33083	-21.6887		0.04098	-21.5409	0.04073	-21.5403		0.04117	-21.42	0.12634	-21.3349		0.61098	-1.35433	0.61105	-4.39388		0.04098	-2.29662	0.04098	-6.56401
0.3787	-21.122	0.37852	-21.689		0.08195	-21.5413	0.08147	-21.5399		0.08235	-21.4203	0.16845	-21.3354		0.6624	-1.58187	0.6625	-4.15732		0.08196	-2.27714	0.08195	-6.76937
0.42658	-21.1225	0.42621	-21.6896		0.12293	-21.5417	0.1222	-21.539		0.12352	-21.4203	0.22124	-21.3355		0.71382	-1.38236	0.71396	-3.88498		0.12294	-2.46477	0.12293	-6.97499
0.47447	-21.1227	0.47391	-21.69		0.1639	-21.5418	0.16293	-21.5383		0.1647	-21.4203	0.27403	-21.3356		0.77496	-1.48608	0.77501	-4.08042		0.16392	-2.48768	0.1639	-7.0712
0.52235	-21.1227	0.5216	-21.6905		0.20488	-21.5424	0.20419	-21.5385		0.20544	-21.4208	0.32682	-21.3358		0.8361	-1.50834	0.83607	-4.18157		0.2049	-2.35714	0.20488	-7.17971
0.57023	-21.1228	0.56929	-21.6909		0.24586	-21.5432	0.24546	-21.5391		0.24617	-21.4214	0.37306	-21.3347		0.89074	-1.69895	0.89071	-4.34391		0.24588	-2.15816	0.24585	-7.23497
0.62338	-21.1227	0.62223	-21.6905		0.28683	-21.5437	0.28672	-21.5399		0.28691	-21.422	0.4193	-21.3344		0.94537	-1.44367	0.94536	-4.44182		0.28686	-2.50302	0.28683	-7.25065
0.67654	-21.1229	0.67517	-21.6899		0.32781	-21.5441	0.32798	-21.5402		0.32765	-21.4224	0.46554	-21.3339		1	-1.11254	1	-4.47396		0.32784	-2.70928	0.3278	-7.25123
0.72969	-21.1223	0.72811	-21.6894		0.37417	-21.5437	0.37437	-21.5399		0.37398	-21.4221	0.51178	-21.3336		0	--	0	--		0.37419	-2.52261	0.37416	-7.19503
0.77667	-21.1222	0.77451	-21.6892		0.42053	-21.5426	0.42077	-21.5398		0.42032	-21.4212	0.55802	-21.3335		0	-1.0445	0	-4.47045		0.42053	-2.29409	0.42052	-7.00676
0.82366	-21.1221	0.82091	-21.6889		0.46688	-21.5414	0.46716	-21.5404		0.46666	-21.4203	0.60935	-21.3336		0.05463	-1.17369	0.05464	-4.20193		0.46688	-2.28359	0.46688	-6.80343
0.87064	-21.1223	0.86731	-21.6886		0.51324	-21.5409	0.51355	-21.5406		0.51299	-21.4199	0.66068	-21.3339		0.10926	-1.35804	0.10929	-3.95714		0.51323	-2.34321	0.51324	-6.5822
0.91376	-21.1225	0.91154	-21.6892		0.5596	-21.5407	0.55994	-21.5405		0.55933	-21.4196	0.71201	-21.3346		0.1639	-1.50834	0.16393	-4.18157		0.55958	-2.49886	0.5596	-6.48488
0.95688	-21.1227	0.95577	-21.6901		0.61106	-21.541	0.61144	-21.5406		0.61076	-21.42	0.75185	-21.3347		0.21857	-1.38802	0.21856	-3.99411		0.61103	-2.33373	0.61106	-6.60272
1	-21.1228	1	-21.6909		0.66252	-21.5416	0.66293	-21.5402		0.6622	-21.4205	0.7917	-21.335		0.27324	-1.14336	0.27318	-3.76548		0.66247	-2.17432	0.66252	-6.85656
0	--	0	--		0.71398	-21.543	0.71443	-21.5397		0.71363	-21.4215	0.83155	-21.3354		0.32791	-0.84857	0.32781	-3.56614		0.71392	-2.31961	0.71398	-7.08789
0	-21.1218	0	-21.6909		0.75468	-21.5427	0.75531	-21.539		0.75419	-21.4211	0.87366	-21.3349		0.38582	-1.18703	0.38575	-3.62885		0.75464	-2.3338	0.75469	-7.07142
0.04312	-21.1219	0.04423	-21.69		0.79539	-21.5423	0.79619	-21.5384		0.79475	-21.4207	0.91577	-21.3342		0.44373	-1.32765	0.4437	-3.87402		0.79536	-2.45655	0.79539	-7.12346
0.08624	-21.1221	0.08846	-21.689		0.8361	-21.5418	0.83707	-21.5383		0.8353	-21.4203	0.95789	-21.3337		0.50164	-1.30211	0.50164	-4.22965		0.83608	-2.48768	0.8361	-7.0712
0.12936	-21.1223	0.13269	-21.6886		0.87707	-21.5417	0.8778	-21.539		0.87648	-21.4203	1	-21.3335		0.55955	-1.0445	0.55959	-4.47045		0.87706	-2.46477	0.87707	-6.97499
0.17972	-21.122	0.18222	-21.6888		0.91805	-21.5413	0.91853	-21.5399		0.91765	-21.4203	0	--		0.61098	-1.3092	0.61105	-4.27598		0.91804	-2.27714	0.91805	-6.76937
0.23009	-21.1218	0.23176	-21.689		0.95902	-21.5409	0.95927	-21.5403		0.95883	-21.42	0	-21.3321		0.6624	-1.29015	0.6625	-3.84798		0.95902	-2.29662	0.95902	-6.56401
0.28045	-21.1216	0.28129	-21.6888		1	-21.5407	1	-21.5405		1	-21.4196	0.04211	-21.3323		0.71382	-1.21292	0.71396	-3.79147		1	-2.49886	1	-6.48488
0.33082	-21.1216	0.33083	-21.6887		0	--	0	--		0	--	0.08423	-21.3332		0.77496	-1.34869	0.77501	-3.89689		0	--	0	--
0.3787	-21.1219	0.37852	-21.6889		0	-21.5406	0	-21.5399		0	-21.4193	0.12634	-21.3344		0.8361	-1.50834	0.83607	-4.18157		0	-1.93631	0	-6.46842
0.42658	-21.1222	0.42621	-21.6894		0.04098	-21.5408	0.04073	-21.5398		0.04117	-21.4197	0.16845	-21.3343		0.89074	-1.35804	0.89071	-3.95714		0.04098	-1.94274	0.04098	-6.5383
0.47447	-21.1225	0.47391	-21.6899		0.08195	-21.5412	0.08147	-21.5393		0.08235	-21.42	0.22124	-21.3342		0.94537	-1.17369	0.94536	-4.20193		0.08196	-2.2742	0.08195	-6.70136
0.52235	-21.1223	0.5216	-21.6904		0.12293	-21.5417	0.1222	-21.5386		0.12352	-21.4201	0.27403	-21.3341		1	-1.0445	1	-4.47045		0.12294	-2.45803	0.12293	-6.92656
0.57023	-21.1218	0.56929	-21.6909		0.1639	-21.5418	0.16293	-21.5383		0.1647	-21.4203	0.32682	-21.334		0	--	0	--		0.16392	-2.4873	0.1639	-7.07052
0.62338	-21.1223	0.62223	-21.6903		0.20488	-21.5424	0.20419	-21.5385		0.20544	-21.4208	0.37306	-21.3347		0	-1.04356	0	-3.86212		0.2049	-2.33395	0.20488	-7.17891
0.67654	-21.1225	0.67517	-21.6898		0.24586	-21.5432	0.24546	-21.5391		0.24617	-21.4214	0.4193	-21.3337		0.05463	-1.10072	0.05464	-3.83045		0.24588	-2.15165	0.24585	-7.23363
0.72969	-21.1221	0.72811	-21.6893		0.28683	-21.5437	0.28672	-21.5399		0.28691	-21.422	0.46554	-21.3328		0.10926	-1.25787	0.10929	-3.73362		0.28686	-2.49637	0.28683	-7.2487
0.77667	-21.1221	0.77451	-21.6891		0.32781	-21.5441	0.32798	-21.5402		0.32765	-21.4224	0.51178	-21.3322		0.1639	-1.20549	0.16393	-3.75169		0.32784	-2.70468	0.3278	-7.24888
0.82366	-21.1221	0.82091	-21.6888		0.37417	-21.5432	0.37437	-21.5394		0.37398	-21.4219	0.55802	-21.3321		0.21857	-1.23159	0.21856	-3.82254		0.37419	-2.48612	0.37416	-7.18972
0.87064	-21.1223	0.86731	-21.6886		0.42053	-21.5422	0.42077	-21.5397		0.42032	-21.4211	0.60935	-21.3323		0.27324	-0.99592	0.27318	-3.56233		0.42053	-2.24391	0.42052	-6.95912
0.91376	-21.1221	0.91154	-21.689		0.46688	-21.5413	0.46716	-21.5398		0.46666	-21.4202	0.66068	-21.3329		0.32791	-0.82537	0.32781	-3.56547		0.46688	-2.13643	0.46688	-6.78988
0.95688	-21.1219	0.95577	-21.69		0.51324	-21.5408	0.51355	-21.5399		0.51299	-21.4197	0.71201	-21.334		0.38582	-1.08885	0.38575	-3.52987		0.51323	-1.99186	0.51324	-6.56628
1	-21.1218	1	-21.6909		0.5596	-21.5406	0.55994	-21.5399		0.55933	-21.4193	0.75185	-21.3346		0.44373	-1.20257	0.4437	-3.70721		0.55958	-1.93631	0.5596	-6.46842
0	--	0	--		0.61106	-21.5409	0.61144	-21.5399		0.61076	-21.4198	0.7917	-21.3346		0.50164	-1.17612	0.50164	-3.77799		0.61103	-2.00425	0.61106	-6.587
0	-21.1218	0	-21.6893		0.66252	-21.5416	0.66293	-21.5398		0.6622	-21.4203	0.83155	-21.3343		0.55955	-1.04356	0.55959	-3.86212		0.66247	-2.16049	0.66252	-6.8437
0.04312	-21.1219	0.04423	-21.6892		0.71398	-21.5425	0.71443	-21.5396		0.71363	-21.4214	0.87366	-21.3344		0.61098	-1.1633	0.61105	-3.79548		0.71392	-2.29697	0.71398	-7.05218
0.08624	-21.1221	0.08846	-21.689		0.75468	-21.5426	0.75531	-21.5389		0.75419	-21.4211	0.91577	-21.3332		0.6624	-1.23045	0.6625	-3.83535		0.75464	-2.24647	0.75469	-7.03726
0.12936	-21.1219	0.13269	-21.6886		0.79539	-21.5421	0.79619	-21.5382		0.79475	-21.4206	0.95789	-21.3323		0.71382	-1.1899	0.71396	-3.50463		0.79536	-2.31544	0.79539	-7.08647
0.17972	-21.1219	0.18222	-21.6888		0.8361	-21.5418	0.83707	-21.5383		0.8353	-21.4203	1	-21.3321		0.77496	-1.33461	0.77501	-3.85884		0.83608	-2.4873	0.8361	-7.07052
0.23009	-21.1218	0.23176	-21.689		0.87707	-21.5417	0.8778	-21.5386		0.87648	-21.4201	0	--		0.8361	-1.20549	0.83607	-3.75169		0.87706	-2.45803	0.87707	-6.92656
0.28045	-21.1216	0.28129	-21.6888		0.91805	-21.5412	0.91853	-21.5393		0.91765	-21.42	0	-21.3316		0.89074	-1.25787	0.89071	-3.73362		0.91804	-2.2742	0.91805	-6.70136
0.33082	-21.1216	0.33083	-21.6886		0.95902	-21.5408	0.95927	-21.5398		0.95883	-21.4197	0.04211	-21.332		0.94537	-1.10072	0.94536	-3.83045		0.95902	-1.94274	0.95902	-6.5383
0.3787	-21.1214	0.37852	-21.6886		1	-21.5406	1	-21.5399		1	-21.4193	0.08423	-21.333		1	-1.04356	1	-3.86212		1	-1.93631	1	-6.46842
0.42658	-21.1213	0.42621	-21.6893		0	--	0	--		0	--	0.12634	-21.3343		0	--	0	--		0	--	0	--
0.47447	-21.1213	0.47391	-21.6894		0	-21.539	0	-21.5385		0	-21.4192	0.16845	-21.3342		0	-1.04306	0	-3.86035		0	-1.93266	0	-6.4681
0.52235	-21.1215	0.5216	-21.6893		0.04098	-21.5399	0.04073	-21.5384		0.04117	-21.4195	0.22124	-21.3341		0.05463	-1.0987	0.05464	-3.67437		0.04098	-1.93928	0.04098	-6.53791
0.57023	-21.1218	0.56929	-21.6893		0.08195	-21.5409	0.08147	-21.5381		0.08235	-21.4198	0.27403	-21.334		0.10926	-1.25552	0.10929	-3.71821		0.08196	-2.10194	0.08195	-6.7007
0.62338	-21.1215	0.62223	-21.6894		0.12293	-21.541	0.1222	-21.5375		0.12352	-21.4198	0.32682	-21.3339		0.1639	-1.20548	0.16393	-3.75169		0.12294	-2.25564	0.12293	-6.89095
0.67654	-21.1213	0.67517	-21.6894		0.1639	-21.5417	0.16293	-21.5378		0.1647	-21.4202	0.37306	-21.3346		0.21857	-1.22847	0.21856	-3.822		0.16392	-2.21254	0.1639	-7.06888
0.72969	-21.1213	0.72811	-21.6892		0.20488	-21.5412	0.20419	-21.5379		0.20544	-21.4198	0.4193	-21.3335		0.27324	-0.99317	0.27318	-3.5621		0.2049	-2.00275	0.20488	-6.90788
0.77667	-21.1216	0.77451	-21.689		0.24586	-21.5405	0.24546	-21.5384		0.24617	-21.4193	0.46554	-21.3326		0.32791	-0.82536	0.32781	-3.56546		0.24588	-2.1237	0.24585	-6.71284
0.82366	-21.1219	0.82091	-21.6886		0.28683	-21.5394	0.28672	-21.5392		0.28691	-21.4186	0.51178	-21.3319		0.38582	-1.04105	0.38575	-3.52924		0.28686	-1.93059	0.28683	-6.51405
0.87064	-21.1219	0.86731	-21.6886		0.32781	-21.5382	0.32798	-21.5392		0.32765	-21.4177	0.55802	-21.3316		0.44373	-0.84061	0.4437	-3.55343		0.32784	-1.80804	0.3278	-6.3688
0.91376	-21.1221	0.91154	-21.689		0.37417	-21.5402	0.37437	-21.5393		0.37398	-21.4192	0.60935	-21.3319		0.50164	-0.84748	0.50164	-3.69304		0.37419	-2.11489	0.37416	-6.53867
0.95688	-21.1219	0.95577	-21.6892		0.42053	-21.5422	0.42077	-21.5383		0.42032	-21.42	0.66068	-21.3327		0.55955	-1.04306	0.55959	-3.86035		0.42053	-2.16798	0.42052	-6.70276
1	-21.1218	1	-21.6893		0.46688	-21.5413	0.46716	-21.5376		0.46666	-21.42	0.71201	-21.3339		0.61098	-0.86182	0.61105	-3.71307		0.46688	-2.08866	0.46688	-6.7233
0	--	0	--		0.51324	-21.54	0.51355	-21.5383		0.51299	-21.4195	0.75185	-21.3345		0.6624	-0.78662	0.6625	-3.61186		0.51323	-1.9081	0.51324	-6.53753
0	-21.1207	0	-21.6893		0.5596	-21.539	0.55994	-21.5385		0.55933	-21.4192	0.7917	-21.3343		0.71382	-1.10185	0.71396	-3.50335		0.55958	-1.93266	0.5596	-6.4681
0.04312	-21.1209	0.04423	-21.6892		0.61106	-21.5401	0.61144	-21.5382		0.61076	-21.4195	0.83155	-21.3342		0.77496	-1.14164	0.77501	-3.74778		0.61103	-1.96819	0.61106	-6.54956
0.08624	-21.1213	0.08846	-21.6889		0.66252	-21.5416	0.66293	-21.5373		0.6622	-21.42	0.87366	-21.3343		0.8361	-1.20548	0.83607	-3.75169		0.66247	-2.07683	0.66252	-6.78467
0.12936	-21.1219	0.13269	-21.6886		0.71398	-21.5415	0.71443	-21.5388		0.71363	-21.4198	0.91577	-21.333		0.89074	-1.25552	0.89071	-3.71821		0.71392	-2.27359	0.71398	-6.61685
0.17972	-21.1219	0.18222	-21.6888		0.75468	-21.5417	0.75531	-21.5383		0.75419	-21.4199	0.95789	-21.332		0.94537	-1.0987	0.94536	-3.67437		0.75464	-2.12989	0.75469	-6.82152
0.23009	-21.1218	0.23176	-21.689		0.79539	-21.5416	0.79619	-21.5381		0.79475	-21.42	1	-21.3316		1	-1.04306	1	-3.86035		0.79536	-2.06156	0.79539	-6.98377
0.28045	-21.1216	0.28129	-21.6888		0.8361	-21.5417	0.83707	-21.5378		0.8353	-21.4202	0	--		0	--	0	--		0.83608	-2.21254	0.8361	-7.06888
0.33082	-21.1216	0.33083	-21.6886		0.87707	-21.541	0.8778	-21.5375		0.87648	-21.4198	0	-21.3315		0	-1.04259	0	-3.51608		0.87706	-2.25564	0.87707	-6.89095
0.3787	-21.1213	0.37852	-21.6886		0.91805	-21.5409	0.91853	-21.5381		0.91765	-21.4198	0.04211	-21.3317		0.05463	-0.76284	0.05464	-3.65456		0.91804	-2.10194	0.91805	-6.7007
0.42658	-21.1211	0.42621	-21.6892		0.95902	-21.5399	0.95927	-21.5384		0.95883	-21.4195	0.08423	-21.3324		0.10926	-0.63504	0.10929	-3.71653		0.95902	-1.93928	0.95902	-6.53791
0.47447	-21.1209	0.47391	-21.6893		1	-21.539	1	-21.5385		1	-21.4192	0.12634	-21.3333		0.1639	-1.19403	0.16393	-3.74366		1	-1.93266	1	-6.4681
0.52235	-21.1208	0.5216	-21.6893		0	--	0	--		0	--	0.16845	-21.3339		0.21857	-0.97415	0.21856	-3.57759		0	--	0	--
0.57023	-21.1207	0.56929	-21.6893		0	-21.539	0	-21.5383		0	-21.419	0.22124	-21.3339		0.27324	-0.80714	0.27318	-3.36983		0	-1.82596	0	-6.38993
0.62338	-21.1208	0.62223	-21.6893		0.04098	-21.5393	0.04073	-21.5381		0.04117	-21.4183	0.27403	-21.3339		0.32791	-0.80831	0.32781	-3.26046		0.04098	-1.79973	0.04098	-6.4675
0.67654	-21.1209	0.67517	-21.6893		0.08195	-21.5401	0.08147	-21.5375		0.08235	-21.419	0.32682	-21.3339		0.38582	-0.77006	0.38575	-3.42234		0.08196	-1.98818	0.08195	-6.67883
0.72969	-21.1212	0.72811	-21.6891		0.12293	-21.541	0.1222	-21.5374		0.12352	-21.4197	0.37306	-21.3332		0.44373	-0.77847	0.4437	-3.55311		0.12294	-2.05033	0.12293	-6.89009
0.77667	-21.1214	0.77451	-21.6888		0.1639	-21.5417	0.16293	-21.5378		0.1647	-21.4202	0.4193	-21.3326		0.50164	-0.84717	0.50164	-3.67745		0.16392	-2.21048	0.1639	-7.06754
0.82366	-21.1217	0.82091	-21.6886		0.20488	-21.5412	0.20419	-21.5379		0.20544	-21.4198	0.46554	-21.3321		0.55955	-1.04259	0.55959	-3.51608		0.2049	-1.98706	0.20488	-6.90758
0.87064	-21.1219	0.86731	-21.6886		0.24586	-21.5405	0.24546	-21.5384		0.24617	-21.4193	0.51178	-21.3316		0.61098	-0.86152	0.61105	-3.66539		0.24588	-2.10509	0.24585	-6.71234
0.91376	-21.1213	0.91154	-21.6889		0.28683	-21.5394	0.28672	-21.5392		0.28691	-21.4186	0.55802	-21.3315		0.6624	-0.78635	0.6625	-3.5627		0.28686	-1.90865	0.28683	-6.51338
0.95688	-21.1209	0.95577	-21.6892		0.32781	-21.5382	0.32798	-21.5392		0.32765	-21.4177	0.60935	-21.3317		0.71382	-0.76898	0.71396	-3.47817		0.32784	-1.77197	0.3278	-6.36783
1	-21.1207	1	-21.6893		0.37417	-21.5382	0.37437	-21.5393		0.37398	-21.4178	0.66068	-21.3322		0.77496	-1.04942	0.77501	-3.58362		0.37419	-2.00072	0.37416	-6.46488
0	--	0	--		0.42053	-21.5397	0.42077	-21.5379		0.42032	-21.419	0.71201	-21.3328		0.8361	-1.19403	0.83607	-3.74366		0.42053	-2.13649	0.42052	-6.64546
0	-21.1118	0	-21.6892		0.46688	-21.5412	0.46716	-21.5374		0.46666	-21.4199	0.75185	-21.3333		0.89074	-0.63504	0.89071	-3.71653		0.46688	-2.04427	0.46688	-6.6686
0.04312	-21.1117	0.04423	-21.6891		0.51324	-21.54	0.51355	-21.5381		0.51299	-21.4187	0.7917	-21.3338		0.94537	-0.76284	0.94536	-3.65456		0.51323	-1.89216	0.51324	-6.48629
0.08624	-21.1114	0.08846	-21.6888		0.5596	-21.539	0.55994	-21.5383		0.55933	-21.419	0.83155	-21.3339		1	-1.04259	1	-3.51608		0.55958	-1.82596	0.5596	-6.38993
0.12936	-21.111	0.13269	-21.6884		0.61106	-21.5401	0.61144	-21.538		0.61076	-21.4188	0.87366	-21.3333		0	--	0	--		0.61103	-1.92	0.61106	-6.50719
0.17972	-21.1108	0.18222	-21.6884		0.66252	-21.5409	0.66293	-21.5373		0.6622	-21.4199	0.91577	-21.3324		0	-0.87109	0	-3.49698		0.66247	-2.05128	0.66252	-6.7315
0.23009	-21.11	0.23176	-21.6885		0.71398	-21.5392	0.71443	-21.5383		0.71363	-21.4186	0.95789	-21.3317		0.05463	-0.71698	0.05464	-3.60365		0.71392	-2.21644	0.71398	-6.6146
0.28045	-21.1089	0.28129	-21.6886		0.75468	-21.5396	0.75531	-21.538		0.75419	-21.4187	1	-21.3315		0.10926	-0.6286	0.10929	-3.65352		0.75464	-2.08174	0.75469	-6.69847
0.33082	-21.1075	0.33083	-21.6878		0.79539	-21.5409	0.79619	-21.538		0.79475	-21.4196	0	--		0.1639	-1.19403	0.16393	-3.74365		0.79536	-1.9963	0.79539	-6.86905
0.3787	-21.1088	0.37852	-21.6886		0.8361	-21.5417	0.83707	-21.5378		0.8353	-21.4202	0	-21.3312		0.21857	-0.95986	0.21856	-3.57719		0.83608	-2.21048	0.8361	-7.06754
0.42658	-21.11	0.42621	-21.6891		0.87707	-21.541	0.8778	-21.5374		0.87648	-21.4197	0.04211	-21.3315		0.27324	-0.78964	0.27318	-3.36942		0.87706	-2.05033	0.87707	-6.89009
0.47447	-21.1109	0.47391	-21.6892		0.91805	-21.5401	0.91853	-21.5375		0.91765	-21.419	0.08423	-21.3322		0.32791	-0.80829	0.32781	-3.26045		0.91804	-1.98818	0.91805	-6.67883
0.52235	-21.1115	0.5216	-21.6892		0.95902	-21.5393	0.95927	-21.5381		0.95883	-21.4183	0.12634	-21.333		0.38582	-0.76996	0.38575	-3.42204		0.95902	-1.79973	0.95902	-6.4675
0.57023	-21.1118	0.56929	-21.6892		1	-21.539	1	-21.5383		1	-21.419	0.16845	-21.3338		0.44373	-0.7782	0.4437	-3.55277		1	-1.82596	1	-6.38993
0.62338	-21.1115	0.62223	-21.6892		0	--	0	--		0	--	0.22124	-21.3338		0.50164	-0.72663	0.50164	-3.53406		0	--	0	--
0.67654	-21.1107	0.67517	-21.6892		0	-21.5389	0	-21.536		0	-21.4177	0.27403	-21.3338		0.55955	-0.87109	0.55959	-3.49698		0	-1.81961	0	-6.32597
0.72969	-21.1096	0.72811	-21.6889		0.04098	-21.5392	0.04073	-21.5362		0.04117	-21.4182	0.32682	-21.3338		0.61098	-0.74256	0.61105	-3.52124		0.04098	-1.7733	0.04098	-6.40589
0.77667	-21.1105	0.77451	-21.6888		0.08195	-21.5401	0.08147	-21.5367		0.08235	-21.4189	0.37306	-21.3331		0.6624	-0.71191	0.6625	-3.5621		0.08196	-1.95125	0.08195	-6.62307
0.82366	-21.1109	0.82091	-21.6886		0.12293	-21.5407	0.1222	-21.5372		0.12352	-21.4194	0.4193	-21.3325		0.71382	-0.7688	0.71396	-3.47804		0.12294	-1.92068	0.12293	-6.48664
0.87064	-21.111	0.86731	-21.6884		0.1639	-21.5397	0.16293	-21.5377		0.1647	-21.4184	0.46554	-21.3319		0.77496	-0.69169	0.77501	-3.54907		0.16392	-1.75279	0.1639	-6.07392
0.91376	-21.1114	0.91154	-21.6888		0.20488	-21.5393	0.20419	-21.5378		0.20544	-21.4182	0.51178	-21.3314		0.8361	-1.19403	0.83607	-3.74365		0.2049	-1.86992	0.20488	-6.08547
0.95688	-21.1117	0.95577	-21.6891		0.24586	-21.5385	0.24546	-21.5381		0.24617	-21.4177	0.55802	-21.3312		0.89074	-0.6286	0.89071	-3.65352		0.24588	-2.09025	0.24585	-6.12483
1	-21.1118	1	-21.6892		0.28683	-21.5376	0.28672	-21.5385		0.28691	-21.4171	0.60935	-21.3314		0.94537	-0.71698	0.94536	-3.60365		0.28686	-1.83562	0.28683	-6.2026
0	--	0	--		0.32781	-21.5382	0.32798	-21.5392		0.32765	-21.4177	0.66068	-21.332		1	-0.87109	1	-3.49698		0.32784	-1.7577	0.3278	-6.30162
0	-21.1097	0	-21.6892		0.37417	-21.5382	0.37437	-21.5389		0.37398	-21.4177	0.71201	-21.3327		0	--	0	--		0.37419	-1.82878	0.37416	-6.40089
0.04312	-21.1101	0.04423	-21.689		0.42053	-21.5381	0.42077	-21.5376		0.42032	-21.418	0.75185	-21.3331		0	-0.01648	0	-3.35477		0.42053	-1.93745	0.42052	-6.6378
0.08624	-21.1105	0.08846	-21.6888		0.46688	-21.5381	0.46716	-21.5371		0.46666	-21.4182	0.7917	-21.3335		0.05463	-0.18898	0.05464	-3.59216		0.46688	-2.02903	0.46688	-6.62993
0.12936	-21.111	0.13269	-21.6884		0.51324	-21.5384	0.51355	-21.5363		0.51299	-21.4185	0.83155	-21.3338		0.10926	-0.6206	0.10929	-3.6364		0.51323	-1.87877	0.51324	-6.42523
0.17972	-21.1107	0.18222	-21.6884		0.5596	-21.5389	0.55994	-21.536		0.55933	-21.4177	0.87366	-21.333		0.1639	-0.58751	0.16393	-3.5728		0.55958	-1.81961	0.5596	-6.32597
0.23009	-21.11	0.23176	-21.6885		0.61106	-21.5383	0.61144	-21.5363		0.61076	-21.4185	0.91577	-21.3322		0.21857	-0.6103	0.21856	-3.4874		0.61103	-1.89308	0.61106	-6.44672
0.28045	-21.1089	0.28129	-21.6886		0.66252	-21.5381	0.66293	-21.5371		0.6622	-21.4181	0.95789	-21.3315		0.27324	-0.68143	0.27318	-3.29642		0.66247	-2.01346	0.66252	-6.64054
0.33082	-21.1075	0.33083	-21.6878		0.71398	-21.5381	0.71443	-21.538		0.71363	-21.4179	1	-21.3312		0.32791	-0.80293	0.32781	-3.25962		0.71392	-1.8949	0.71398	-6.55497
0.3787	-21.1085	0.37852	-21.6886		0.75468	-21.5396	0.75531	-21.5376		0.75419	-21.4186	0	--		0.38582	-0.67372	0.38575	-3.30485		0.75464	-1.94954	0.75469	-6.43907
0.42658	-21.1092	0.42621	-21.689		0.79539	-21.5398	0.79619	-21.5375		0.79475	-21.4187	0	-21.3301		0.44373	-0.65291	0.4437	-3.42245		0.79536	-1.85889	0.79539	-6.26362
0.47447	-21.1096	0.47391	-21.6891		0.8361	-21.5397	0.83707	-21.5377		0.8353	-21.4184	0.04211	-21.3301		0.50164	-0.28766	0.50164	-3.53376		0.83608	-1.75279	0.8361	-6.07392
0.52235	-21.1098	0.5216	-21.6891		0.87707	-21.5407	0.8778	-21.5372		0.87648	-21.4194	0.08423	-21.3302		0.55955	-0.01648	0.55959	-3.35477		0.87706	-1.92068	0.87707	-6.48664
0.57023	-21.1097	0.56929	-21.6892		0.91805	-21.5401	0.91853	-21.5367		0.91765	-21.4189	0.12634	-21.3302		0.61098	-0.23567	0.61105	-3.52098		0.91804	-1.95125	0.91805	-6.62307
0.62338	-21.1098	0.62223	-21.6891		0.95902	-21.5392	0.95927	-21.5362		0.95883	-21.4182	0.16845	-21.3301		0.6624	-0.66045	0.6625	-3.42561		0.95902	-1.7733	0.95902	-6.40589
0.67654	-21.1096	0.67517	-21.6891		1	-21.5389	1	-21.536		1	-21.4177	0.22124	-21.3301		0.71382	-0.65618	0.71396	-3.37477		1	-1.81961	1	-6.32597
0.72969	-21.109	0.72811	-21.6889		0	--	0	--		0	--	0.27403	-21.3299		0.77496	-0.62618	0.77501	-3.54868		0	--	0	--
0.77667	-21.11	0.77451	-21.6888		0	-21.5389	0	-21.5359		0	-21.4175	0.32682	-21.3294		0.8361	-0.58751	0.83607	-3.5728		0	-1.48501	0	-5.27185
0.82366	-21.1107	0.82091	-21.6885		0.04098	-21.5379	0.04073	-21.536		0.04117	-21.4181	0.37306	-21.3297		0.89074	-0.6206	0.89071	-3.6364		0.04098	-1.76232	0.04098	-5.24342
0.87064	-21.111	0.86731	-21.6884		0.08195	-21.5375	0.08147	-21.5364		0.08235	-21.4174	0.4193	-21.3299		0.94537	-0.18898	0.94536	-3.59216		0.08196	-1.94838	0.08195	-5.28337
0.91376	-21.1105	0.91154	-21.6888		0.12293	-21.5386	0.1222	-21.5369		0.12352	-21.4174	0.46554	-21.33		1	-0.01648	1	-3.35477		0.12294	-1.91906	0.12293	-5.6553
0.95688	-21.1101	0.95577	-21.689		0.1639	-21.5396	0.16293	-21.5377		0.1647	-21.4184	0.51178	-21.3301		0	--	0	--		0.16392	-1.75244	0.1639	-6.07371
1	-21.1097	1	-21.6892		0.20488	-21.5393	0.20419	-21.5378		0.20544	-21.4182	0.55802	-21.3301		0	0	0	-3.35354		0.2049	-1.86736	0.20488	-6.08526
0	--	0	--		0.24586	-21.5385	0.24546	-21.5381		0.24617	-21.4177	0.60935	-21.33		0.05463	-0.17308	0.05464	-3.42355		0.24588	-2.08293	0.24585	-6.12454
0	-21.1097	0	-21.6879		0.28683	-21.5376	0.28672	-21.5385		0.28691	-21.4171	0.66068	-21.33		0.10926	-0.61097	0.10929	-3.60077		0.28686	-1.82882	0.28683	-6.20216
0.04312	-21.1094	0.04423	-21.688		0.32781	-21.5382	0.32798	-21.5392		0.32765	-21.4177	0.71201	-21.3298		0.1639	-0.58751	0.16393	-3.5728		0.32784	-1.75578	0.3278	-6.30109
0.08624	-21.1093	0.08846	-21.6883		0.37417	-21.5382	0.37437	-21.538		0.37398	-21.4176	0.75185	-21.3301		0.21857	-0.60876	0.21856	-3.48722		0.37419	-1.79469	0.37416	-6.04688
0.12936	-21.1093	0.13269	-21.6884		0.42053	-21.5381	0.42077	-21.5369		0.42032	-21.4174	0.7917	-21.3302		0.27324	-0.6786	0.27318	-3.29555		0.42053	-1.9	0.42052	-5.7008
0.17972	-21.1091	0.18222	-21.6884		0.46688	-21.5381	0.46716	-21.5368		0.46666	-21.4173	0.83155	-21.3301		0.32791	-0.80292	0.32781	-3.25958		0.46688	-1.76009	0.46688	-5.33896
0.23009	-21.1084	0.23176	-21.6884		0.51324	-21.5384	0.51355	-21.5361		0.51299	-21.4172	0.87366	-21.3302		0.38582	-0.57089	0.38575	-3.29458		0.51323	-1.85973	0.51324	-5.24235
0.28045	-21.1075	0.28129	-21.6885		0.5596	-21.5389	0.55994	-21.5359		0.55933	-21.4175	0.91577	-21.3302		0.44373	-0.3069	0.4437	-3.4214		0.55958	-1.48501	0.5596	-5.27185
0.33082	-21.1075	0.33083	-21.6877		0.61106	-21.5383	0.61144	-21.5362		0.61076	-21.4172	0.95789	-21.3301		0.50164	-0.08889	0.50164	-3.47999		0.61103	-1.88204	0.61106	-5.2373
0.3787	-21.1073	0.37852	-21.6885		0.66252	-21.5381	0.66293	-21.537		0.6622	-21.4173	1	-21.3301		0.55955	0	0.55959	-3.35354		0.66247	-1.84273	0.66252	-5.41485
0.42658	-21.1082	0.42621	-21.6888		0.71398	-21.5381	0.71443	-21.5372		0.71363	-21.4174	0	--		0.61098	-0.0709	0.61105	-3.48547		0.71392	-1.85864	0.71398	-5.81992
0.47447	-21.1089	0.47391	-21.6885		0.75468	-21.5378	0.75531	-21.5371		0.75419	-21.417	0	-21.33		0.6624	-0.25147	0.6625	-3.39076		0.75464	-1.78515	0.75469	-5.79788
0.52235	-21.1094	0.5216	-21.6881		0.79539	-21.5389	0.79619	-21.5373		0.79475	-21.4178	0.04211	-21.3299		0.71382	-0.48113	0.71396	-3.33879		0.79536	-1.82566	0.79539	-5.90184
0.57023	-21.1097	0.56929	-21.6879		0.8361	-21.5396	0.83707	-21.5377		0.8353	-21.4184	0.08423	-21.3298		0.77496	-0.60994	0.77501	-3.42609		0.83608	-1.75244	0.8361	-6.07371
0.62338	-21.1094	0.62223	-21.6882		0.87707	-21.5386	0.8778	-21.5369		0.87648	-21.4174	0.12634	-21.3298		0.8361	-0.58751	0.83607	-3.5728		0.87706	-1.91906	0.87707	-5.6553
0.67654	-21.1088	0.67517	-21.6886		0.91805	-21.5375	0.91853	-21.5364		0.91765	-21.4174	0.16845	-21.3301		0.89074	-0.61097	0.89071	-3.60077		0.91804	-1.94838	0.91805	-5.28337
0.72969	-21.1079	0.72811	-21.6888		0.95902	-21.5379	0.95927	-21.536		0.95883	-21.4181	0.22124	-21.3301		0.94537	-0.17308	0.94536	-3.42355		0.95902	-1.76232	0.95902	-5.24342
0.77667	-21.1086	0.77451	-21.6888		1	-21.5389	1	-21.5359		1	-21.4175	0.27403	-21.3298		1	0	1	-3.35354		1	-1.48501	1	-5.27185
0.82366	-21.1091	0.82091	-21.6885		0	--	0	--		0	--	0.32682	-21.3294		0	--	0	--		0	--	0	--
0.87064	-21.1093	0.86731	-21.6884		0	-21.5356	0	-21.5354		0	-21.4163	0.37306	-21.3296		0	0.13109	0	-3.32392		0	-1.45246	0	-5.25703
0.91376	-21.1093	0.91154	-21.6883		0.04098	-21.5365	0.04073	-21.5356		0.04117	-21.4158	0.4193	-21.3296		0.05463	0.3581	0.05464	-3.40114		0.04098	-1.7073	0.04098	-5.16895
0.95688	-21.1094	0.95577	-21.688		0.08195	-21.5369	0.08147	-21.5361		0.08235	-21.4163	0.46554	-21.3296		0.10926	0.39728	0.10929	-3.35111		0.08196	-1.73066	0.08195	-5.15421
1	-21.1097	1	-21.6879		0.12293	-21.5358	0.1222	-21.5367		0.12352	-21.4165	0.51178	-21.3299		0.1639	0.36582	0.16393	-2.89644		0.12294	-1.62222	0.12293	-5.04653
0	--	0	--		0.1639	-21.5348	0.16293	-21.5364		0.1647	-21.4155	0.55802	-21.33		0.21857	0.26551	0.21856	-2.88316		0.16392	-1.73785	0.1639	-4.88619
0	-21.1094	0	-21.6879		0.20488	-21.5351	0.20419	-21.5362		0.20544	-21.4157	0.60935	-21.3298		0.27324	0.11089	0.27318	-3.23261		0.2049	-1.74608	0.20488	-4.86471
0.04312	-21.1094	0.04423	-21.688		0.24586	-21.5359	0.24546	-21.5356		0.24617	-21.4162	0.66068	-21.3296		0.32791	0.11266	0.32781	-3.01546		0.24588	-1.68819	0.24585	-4.80071
0.08624	-21.1093	0.08846	-21.6883		0.28683	-21.537	0.28672	-21.5347		0.28691	-21.4168	0.71201	-21.3296		0.38582	0.07504	0.38575	-3.17309		0.28686	-1.69438	0.28683	-4.69578
0.12936	-21.1093	0.13269	-21.6884		0.32781	-21.5367	0.32798	-21.5338		0.32765	-21.4163	0.75185	-21.3299		0.44373	0.25705	0.4437	-3.40543		0.32784	-1.38423	0.3278	-4.56322
0.17972	-21.109	0.18222	-21.6884		0.37417	-21.5367	0.37437	-21.5351		0.37398	-21.4164	0.7917	-21.33		0.50164	0.36206	0.50164	-3.26413		0.37419	-1.63378	0.37416	-4.79313
0.23009	-21.1084	0.23176	-21.6884		0.42053	-21.5366	0.42077	-21.5365		0.42032	-21.4165	0.83155	-21.3301		0.55955	0.13109	0.55959	-3.32392		0.42053	-1.75356	0.42052	-4.99104
0.28045	-21.1074	0.28129	-21.6885		0.46688	-21.5364	0.46716	-21.5365		0.46666	-21.4165	0.87366	-21.3298		0.61098	0.31784	0.61105	-3.24463		0.46688	-1.75772	0.46688	-5.13661
0.33082	-21.1075	0.33083	-21.6877		0.51324	-21.5361	0.51355	-21.5357		0.51299	-21.4165	0.91577	-21.3298		0.6624	0.31677	0.6625	-3.38929		0.51323	-1.59704	0.51324	-5.22582
0.3787	-21.1072	0.37852	-21.6884		0.5596	-21.5356	0.55994	-21.5354		0.55933	-21.4163	0.95789	-21.3299		0.71382	0.11714	0.71396	-3.3251		0.55958	-1.45246	0.5596	-5.25703
0.42658	-21.108	0.42621	-21.6887		0.61106	-21.5362	0.61144	-21.5358		0.61076	-21.4165	1	-21.33		0.77496	0.25386	0.77501	-3.21651		0.61103	-1.55024	0.61106	-5.21885
0.47447	-21.1088	0.47391	-21.6884		0.66252	-21.5365	0.66293	-21.5367		0.6622	-21.4165	0	--		0.8361	0.36582	0.83607	-2.89644		0.66247	-1.82425	0.66252	-5.10937
0.52235	-21.1092	0.5216	-21.6881		0.71398	-21.5366	0.71443	-21.536		0.71363	-21.4165	0	-21.3299		0.89074	0.39728	0.89071	-3.35111		0.71392	-1.65662	0.71398	-4.93116
0.57023	-21.1094	0.56929	-21.6879		0.75468	-21.5367	0.75531	-21.5366		0.75419	-21.4169	0.04211	-21.3298		0.94537	0.3581	0.94536	-3.40114		0.75464	-1.76676	0.75469	-4.96099
0.62338	-21.1092	0.62223	-21.6881		0.79539	-21.5355	0.79619	-21.5368		0.79475	-21.4161	0.08423	-21.3297		1	0.13109	1	-3.32392		0.79536	-1.76313	0.79539	-4.94561
0.67654	-21.1086	0.67517	-21.6885		0.8361	-21.5348	0.83707	-21.5364		0.8353	-21.4155	0.12634	-21.3296		0	--	0	--		0.83608	-1.73785	0.8361	-4.88619
0.72969	-21.1078	0.72811	-21.6887		0.87707	-21.5358	0.8778	-21.5367		0.87648	-21.4165	0.16845	-21.3296		0	0.73165	0	-3.32243		0.87706	-1.62222	0.87707	-5.04653
0.77667	-21.1086	0.77451	-21.6887		0.91805	-21.5369	0.91853	-21.5361		0.91765	-21.4163	0.22124	-21.3292		0.05463	0.57624	0.05464	-3.15664		0.91804	-1.73066	0.91805	-5.15421
0.82366	-21.1091	0.82091	-21.6884		0.95902	-21.5365	0.95927	-21.5356		0.95883	-21.4158	0.27403	-21.3289		0.10926	0.4842	0.10929	-3.18121		0.95902	-1.7073	0.95902	-5.16895
0.87064	-21.1093	0.86731	-21.6884		1	-21.5356	1	-21.5354		1	-21.4163	0.32682	-21.3294		0.1639	0.36582	0.16393	-2.89644		1	-1.45246	1	-5.25703
0.91376	-21.1093	0.91154	-21.6883		0	--	0	--		0	--	0.37306	-21.3291		0.21857	0.26947	0.21856	-2.88307		0	--	0	--
0.95688	-21.1094	0.95577	-21.688		0	-21.5356	0	-21.5354		0	-21.4161	0.4193	-21.3289		0.27324	0.11541	0.27318	-3.23196		0	-1.45238	0	-5.2539
1	-21.1094	1	-21.6879		0.04098	-21.5354	0.04073	-21.5354		0.04117	-21.4156	0.46554	-21.3294		0.32791	0.11267	0.32781	-3.01543		0.04098	-1.69871	0.04098	-5.15243
0	--	0	--		0.08195	-21.5348	0.08147	-21.5358		0.08235	-21.415	0.51178	-21.3298		0.38582	0.24844	0.38575	-3.17221		0.08196	-1.43024	0.08195	-4.8866
0	-21.1029	0	-21.6877		0.12293	-21.5341	0.1222	-21.5366		0.12352	-21.4147	0.55802	-21.3299		0.44373	0.53883	0.4437	-3.3246		0.12294	-1.37103	0.12293	-4.68222
0.04312	-21.1029	0.04423	-21.6878		0.1639	-21.5348	0.16293	-21.5364		0.1647	-21.4155	0.60935	-21.3297		0.50164	0.54535	0.50164	-3.26148		0.16392	-1.73623	0.1639	-4.8854
0.08624	-21.1029	0.08846	-21.688		0.20488	-21.5351	0.20419	-21.5362		0.20544	-21.4157	0.66068	-21.3293		0.55955	0.73165	0.55959	-3.32243		0.2049	-1.73988	0.20488	-4.86398
0.12936	-21.1029	0.13269	-21.6882		0.24586	-21.5359	0.24546	-21.5356		0.24617	-21.4162	0.71201	-21.3288		0.61098	0.57763	0.61105	-3.24234		0.24588	-1.67731	0.24585	-4.80015
0.17972	-21.1034	0.18222	-21.6883		0.28683	-21.537	0.28672	-21.5347		0.28691	-21.4168	0.75185	-21.329		0.6624	0.60758	0.6625	-3.37622		0.28686	-1.6805	0.28683	-4.69543
0.23009	-21.1044	0.23176	-21.6884		0.32781	-21.5367	0.32798	-21.5338		0.32765	-21.4163	0.7917	-21.3294		0.71382	0.33826	0.71396	-3.24187		0.32784	-1.37781	0.3278	-4.56294
0.28045	-21.1059	0.28129	-21.6884		0.37417	-21.5367	0.37437	-21.5347		0.37398	-21.4162	0.83155	-21.3296		0.77496	0.32451	0.77501	-2.99083		0.37419	-1.327	0.37416	-4.78752
0.33082	-21.1062	0.33083	-21.6877		0.42053	-21.5366	0.42077	-21.5362		0.42032	-21.4159	0.87366	-21.3296		0.8361	0.36582	0.83607	-2.89644		0.42053	-1.4593	0.42052	-4.98556
0.3787	-21.1063	0.37852	-21.6883		0.46688	-21.5364	0.46716	-21.536		0.46666	-21.4155	0.91577	-21.3297		0.89074	0.4842	0.89071	-3.18121		0.46688	-1.74762	0.46688	-5.12395
0.42658	-21.1051	0.42621	-21.6879		0.51324	-21.5361	0.51355	-21.5355		0.51299	-21.4152	0.95789	-21.3298		0.94537	0.57624	0.94536	-3.15664		0.51323	-1.49225	0.51324	-5.05317
0.47447	-21.104	0.47391	-21.6877		0.5596	-21.5356	0.55994	-21.5354		0.55933	-21.4161	1	-21.3299		1	0.73165	1	-3.32243		0.55958	-1.45238	0.5596	-5.2539
0.52235	-21.1032	0.5216	-21.6877		0.61106	-21.5362	0.61144	-21.5356		0.61076	-21.4151	0	--		0	--	0	--		0.61103	-1.51227	0.61106	-5.03992
0.57023	-21.1029	0.56929	-21.6877		0.66252	-21.5365	0.66293	-21.5362		0.6622	-21.4156	0	-21.3284		0	1.15327	0	-3.05019		0.66247	-1.70998	0.66252	-5.10092
0.62338	-21.1033	0.62223	-21.6877		0.71398	-21.5366	0.71443	-21.5357		0.71363	-21.416	0.04211	-21.3288		0.05463	0.74623	0.05464	-3.12753		0.71392	-1.30657	0.71398	-4.92574
0.67654	-21.1043	0.67517	-21.6877		0.75468	-21.5354	0.75531	-21.5359		0.75419	-21.4154	0.08423	-21.3293		0.10926	0.93383	0.10929	-2.92013		0.75464	-1.68822	0.75469	-4.8424
0.72969	-21.1055	0.72811	-21.6879		0.79539	-21.5346	0.79619	-21.5358		0.79475	-21.4153	0.12634	-21.3295		0.1639	1.48592	0.16393	-2.65366		0.79536	-1.63142	0.79539	-4.78375
0.77667	-21.1042	0.77451	-21.6881		0.8361	-21.5348	0.83707	-21.5364		0.8353	-21.4155	0.16845	-21.3295		0.21857	0.88827	0.21856	-2.83114		0.83608	-1.73623	0.8361	-4.8854
0.82366	-21.1033	0.82091	-21.6883		0.87707	-21.5341	0.8778	-21.5366		0.87648	-21.4147	0.22124	-21.3291		0.27324	0.38285	0.27318	-2.87735		0.87706	-1.37103	0.87707	-4.68222
0.87064	-21.1029	0.86731	-21.6882		0.91805	-21.5348	0.91853	-21.5358		0.91765	-21.415	0.27403	-21.3289		0.32791	0.11533	0.32781	-3.01324		0.91804	-1.43024	0.91805	-4.8866
0.91376	-21.1029	0.91154	-21.688		0.95902	-21.5354	0.95927	-21.5354		0.95883	-21.4156	0.32682	-21.3294		0.38582	0.24912	0.38575	-3.15458		0.95902	-1.69871	0.95902	-5.15243
0.95688	-21.1029	0.95577	-21.6878		1	-21.5356	1	-21.5354		1	-21.4161	0.37306	-21.329		0.44373	0.54021	0.4437	-3.32415		1	-1.45238	1	-5.2539
1	-21.1029	1	-21.6877		0	--	0	--		0	--	0.4193	-21.3287		0.50164	0.8383	0.50164	-3.23406		0	--	0	--
0	--	0	--		0	-21.5355	0	-21.5321		0	-21.4144	0.46554	-21.3288		0.55955	1.15327	0.55959	-3.05019		0	-1.42331	0	-4.85259
0	-21.1029	0	-21.6876		0.04098	-21.5353	0.04073	-21.5327		0.04117	-21.4153	0.51178	-21.3286		0.61098	0.87127	0.61105	-3.20955		0.04098	-1.28671	0.04098	-4.95472
0.04312	-21.1029	0.04423	-21.6877		0.08195	-21.5347	0.08147	-21.5334		0.08235	-21.4149	0.55802	-21.3284		0.6624	0.60908	0.6625	-3.3284		0.08196	-1.26222	0.08195	-4.88178
0.08624	-21.1029	0.08846	-21.688		0.12293	-21.5341	0.1222	-21.5349		0.12352	-21.4142	0.60935	-21.3286		0.71382	0.3392	0.71396	-3.24114		0.12294	-1.34347	0.12293	-4.50654
0.12936	-21.1029	0.13269	-21.6882		0.1639	-21.5335	0.16293	-21.5355		0.1647	-21.4135	0.66068	-21.3288		0.77496	0.81181	0.77501	-2.88706		0.16392	-1.48923	0.1639	-4.03862
0.17972	-21.1034	0.18222	-21.6882		0.20488	-21.5342	0.20419	-21.5353		0.20544	-21.4141	0.71201	-21.3287		0.8361	1.48592	0.83607	-2.65366		0.2049	-1.43334	0.20488	-4.35112
0.23009	-21.1044	0.23176	-21.6884		0.24586	-21.5349	0.24546	-21.5348		0.24617	-21.4148	0.75185	-21.3289		0.89074	0.93383	0.89071	-2.92013		0.24588	-1.07026	0.24585	-4.55651
0.28045	-21.1059	0.28129	-21.6884		0.28683	-21.5358	0.28672	-21.534		0.28691	-21.4156	0.7917	-21.3293		0.94537	0.74623	0.94536	-3.12753		0.28686	-0.8018	0.28683	-4.62864
0.33082	-21.1062	0.33083	-21.6877		0.32781	-21.5367	0.32798	-21.5338		0.32765	-21.4163	0.83155	-21.3295		1	1.15327	1	-3.05019		0.32784	-1.30084	0.3278	-4.55699
0.3787	-21.1061	0.37852	-21.6881		0.37417	-21.5363	0.37437	-21.5337		0.37398	-21.4161	0.87366	-21.3295		0	--	0	--		0.37419	-1.24209	0.37416	-4.53345
0.42658	-21.1048	0.42621	-21.6879		0.42053	-21.5347	0.42077	-21.5331		0.42032	-21.4149	0.91577	-21.3293		0	1.15393	0	-3.04524		0.42053	-1.15908	0.42052	-4.4452
0.47447	-21.1038	0.47391	-21.6877		0.46688	-21.5338	0.46716	-21.5328		0.46666	-21.4141	0.95789	-21.3288		0.05463	1.18745	0.05464	-3.07263		0.46688	-1.2167	0.46688	-4.48487
0.52235	-21.1032	0.5216	-21.6876		0.51324	-21.5348	0.51355	-21.5325		0.51299	-21.415	1	-21.3284		0.10926	1.29343	0.10929	-2.90354		0.51323	-1.47826	0.51324	-4.96721
0.57023	-21.1029	0.56929	-21.6876		0.5596	-21.5355	0.55994	-21.5321		0.55933	-21.4144	0	--		0.1639	1.48592	0.16393	-2.65366		0.55958	-1.42331	0.5596	-4.85259
0.62338	-21.1032	0.62223	-21.6876		0.61106	-21.5347	0.61144	-21.5325		0.61076	-21.4151	0	-21.3278		0.21857	0.89244	0.21856	-2.83051		0.61103	-1.50056	0.61106	-4.96
0.67654	-21.104	0.67517	-21.6877		0.66252	-21.5338	0.66293	-21.5328		0.6622	-21.4141	0.04211	-21.3283		0.27324	0.3833	0.27318	-2.87707		0.66247	-1.2191	0.66252	-4.40385
0.72969	-21.1052	0.72811	-21.6879		0.71398	-21.5352	0.71443	-21.5334		0.71363	-21.4153	0.08423	-21.3284		0.32791	0.11535	0.32781	-3.01323		0.71392	-1.22717	0.71398	-4.48063
0.77667	-21.1041	0.77451	-21.6881		0.75468	-21.5348	0.75531	-21.5346		0.75419	-21.4152	0.12634	-21.3285		0.38582	0.4721	0.38575	-3.0658		0.75464	-1.44807	0.75469	-4.64312
0.82366	-21.1033	0.82091	-21.6882		0.79539	-21.5344	0.79619	-21.5356		0.79475	-21.4144	0.16845	-21.3285		0.44373	0.82537	0.4437	-3.2803		0.79536	-1.59909	0.79539	-4.52234
0.87064	-21.1029	0.86731	-21.6882		0.8361	-21.5335	0.83707	-21.5355		0.8353	-21.4135	0.22124	-21.3286		0.50164	0.84032	0.50164	-3.23365		0.83608	-1.48923	0.8361	-4.03862
0.91376	-21.1029	0.91154	-21.688		0.87707	-21.5341	0.8778	-21.5349		0.87648	-21.4142	0.27403	-21.3284		0.55955	1.15393	0.55959	-3.04524		0.87706	-1.34347	0.87707	-4.50654
0.95688	-21.1029	0.95577	-21.6877		0.91805	-21.5347	0.91853	-21.5334		0.91765	-21.4149	0.32682	-21.3278		0.61098	0.87335	0.61105	-3.20954		0.91804	-1.26222	0.91805	-4.88178
1	-21.1029	1	-21.6876		0.95902	-21.5353	0.95927	-21.5327		0.95883	-21.4153	0.37306	-21.3283		0.6624	0.71775	0.6625	-3.32818		0.95902	-1.28671	0.95902	-4.95472
0	--	0	--		1	-21.5355	1	-21.5321		1	-21.4144	0.4193	-21.3285		0.71382	0.66232	0.71396	-2.99344		1	-1.42331	1	-4.85259
0	-21.1029	0	-21.6862		0	--	0	--		0	--	0.46554	-21.3283		0.77496	1.0091	0.77501	-2.87201		0	--	0	--
0.04312	-21.1029	0.04423	-21.6865		0	-21.5355	0	-21.5321		0	-21.4142	0.51178	-21.3281		0.8361	1.48592	0.83607	-2.65366		0	-1.18525	0	-4.54967
0.08624	-21.1029	0.08846	-21.6872		0.04098	-21.5348	0.04073	-21.5318		0.04117	-21.4136	0.55802	-21.3278		0.89074	1.29343	0.89071	-2.90354		0.04098	-1.19329	0.04098	-4.47696
0.12936	-21.1029	0.13269	-21.688		0.08195	-21.5341	0.08147	-21.5332		0.08235	-21.414	0.60935	-21.3281		0.94537	1.18745	0.94536	-3.07263		0.08196	-1.22169	0.08195	-4.43983
0.17972	-21.103	0.18222	-21.6881		0.12293	-21.5339	0.1222	-21.5344		0.12352	-21.4142	0.66068	-21.3284		1	1.15393	1	-3.04524		0.12294	-1.34105	0.12293	-4.50628
0.23009	-21.1038	0.23176	-21.6883		0.1639	-21.5335	0.16293	-21.5355		0.1647	-21.4135	0.71201	-21.3286		0	--	0	--		0.16392	-1.48206	0.1639	-4.03559
0.28045	-21.1049	0.28129	-21.6884		0.20488	-21.5342	0.20419	-21.5353		0.20544	-21.4141	0.75185	-21.3287		0	1.15395	0	-3.02407		0.2049	-1.42049	0.20488	-4.34924
0.33082	-21.1062	0.33083	-21.6877		0.24586	-21.5349	0.24546	-21.5348		0.24617	-21.4148	0.7917	-21.3286		0.05463	1.19207	0.05464	-3.00854		0.24588	-1.0606	0.24585	-4.55483
0.3787	-21.1053	0.37852	-21.688		0.28683	-21.5358	0.28672	-21.534		0.28691	-21.4156	0.83155	-21.3285		0.10926	1.29917	0.10929	-2.83451		0.28686	-0.79289	0.28683	-4.62712
0.42658	-21.1043	0.42621	-21.6876		0.32781	-21.5367	0.32798	-21.5338		0.32765	-21.4163	0.87366	-21.3285		0.1639	1.49389	0.16393	-2.64991		0.32784	-1.28961	0.3278	-4.55658
0.47447	-21.1036	0.47391	-21.6869		0.37417	-21.5353	0.37437	-21.5333		0.37398	-21.415	0.91577	-21.3284		0.21857	1.59369	0.21856	-2.68206		0.37419	-0.92286	0.37416	-4.51039
0.52235	-21.1031	0.5216	-21.6864		0.42053	-21.5341	0.42077	-21.533		0.42032	-21.4139	0.95789	-21.3283		0.27324	1.55701	0.27318	-2.78983		0.42053	-1.15186	0.42052	-4.42197
0.57023	-21.1029	0.56929	-21.6862		0.46688	-21.5338	0.46716	-21.5325		0.46666	-21.414	1	-21.3278		0.32791	1.67542	0.32781	-2.88014		0.46688	-1.07878	0.46688	-4.43092
0.62338	-21.1031	0.62223	-21.6864		0.51324	-21.5347	0.51355	-21.5319		0.51299	-21.4136	0	--		0.38582	1.28366	0.38575	-2.84948		0.51323	-1.19473	0.51324	-4.51923
0.67654	-21.1037	0.67517	-21.6871		0.5596	-21.5355	0.55994	-21.5321		0.55933	-21.4142	0	-21.3277		0.44373	1.11606	0.4437	-2.89801		0.55958	-1.18525	0.5596	-4.54967
0.72969	-21.1046	0.72811	-21.6878		0.61106	-21.5346	0.61144	-21.532		0.61076	-21.4136	0.04211	-21.328		0.50164	1.5429	0.50164	-2.95812		0.61103	-1.19685	0.61106	-4.51235
0.77667	-21.1036	0.77451	-21.6878		0.66252	-21.5336	0.66293	-21.5326		0.6622	-21.4139	0.08423	-21.3283		0.55955	1.15395	0.55959	-3.02407		0.66247	-0.94805	0.66252	-4.38207
0.82366	-21.103	0.82091	-21.6879		0.71398	-21.5345	0.71443	-21.533		0.71363	-21.4142	0.12634	-21.3283		0.61098	1.49697	0.61105	-2.99163		0.71392	-1.14546	0.71398	-4.45747
0.87064	-21.1029	0.86731	-21.688		0.75468	-21.5341	0.75531	-21.534		0.75419	-21.414	0.16845	-21.3285		0.6624	1.28566	0.6625	-2.91061		0.75464	-1.17264	0.75469	-4.21636
0.91376	-21.1029	0.91154	-21.6872		0.79539	-21.5338	0.79619	-21.5348		0.79475	-21.4137	0.22124	-21.3286		0.71382	1.1351	0.71396	-2.86865		0.79536	-1.29209	0.79539	-4.09886
0.95688	-21.1029	0.95577	-21.6865		0.8361	-21.5335	0.83707	-21.5355		0.8353	-21.4135	0.27403	-21.3284		0.77496	1.27086	0.77501	-2.73712		0.83608	-1.48206	0.8361	-4.03559
1	-21.1029	1	-21.6862		0.87707	-21.5339	0.8778	-21.5344		0.87648	-21.4142	0.32682	-21.3277		0.8361	1.49389	0.83607	-2.64991		0.87706	-1.34105	0.87707	-4.50628
0	--	0	--		0.91805	-21.5341	0.91853	-21.5332		0.91765	-21.414	0.37306	-21.328		0.89074	1.29917	0.89071	-2.83451		0.91804	-1.22169	0.91805	-4.43983
0	-21.1028	0	-21.6862		0.95902	-21.5348	0.95927	-21.5318		0.95883	-21.4136	0.4193	-21.3284		0.94537	1.19207	0.94536	-3.00854		0.95902	-1.19329	0.95902	-4.47696
0.04312	-21.1028	0.04423	-21.6865		1	-21.5355	1	-21.5321		1	-21.4142	0.46554	-21.3282		1	1.15395	1	-3.02407		1	-1.18525	1	-4.54967
0.08624	-21.1028	0.08846	-21.6872		0	--	0	--		0	--	0.51178	-21.328		0	--	0	--		0	--	0	--
0.12936	-21.1029	0.13269	-21.688		0	-21.5326	0	-21.5313		0	-21.4134	0.55802	-21.3277		0	1.15829	0	-3.02392		0	-0.44405	0	-4.54841
0.17972	-21.103	0.18222	-21.6881		0.04098	-21.5327	0.04073	-21.5313		0.04117	-21.4135	0.60935	-21.3281		0.05463	1.65008	0.05464	-2.95927		0.04098	-0.79369	0.04098	-4.47563
0.23009	-21.1038	0.23176	-21.6883		0.08195	-21.5332	0.08147	-21.5311		0.08235	-21.4129	0.66068	-21.3281		0.10926	1.74773	0.10929	-2.70233		0.08196	-1.13812	0.08195	-4.28375
0.28045	-21.1049	0.28129	-21.6884		0.12293	-21.5335	0.1222	-21.5312		0.12352	-21.4129	0.71201	-21.3283		0.1639	1.49389	0.16393	-2.6499		0.12294	-1.32106	0.12293	-3.97473
0.33082	-21.1062	0.33083	-21.6876		0.1639	-21.5335	0.16293	-21.531		0.1647	-21.4135	0.75185	-21.3285		0.21857	1.60025	0.21856	-2.68185		0.16392	-1.35289	0.1639	-4.0355
0.3787	-21.1051	0.37852	-21.688		0.20488	-21.533	0.20419	-21.5314		0.20544	-21.413	0.7917	-21.3285		0.27324	1.568	0.27318	-2.78918		0.2049	-1.26522	0.20488	-3.93668
0.42658	-21.1041	0.42621	-21.6875		0.24586	-21.5326	0.24546	-21.532		0.24617	-21.4126	0.83155	-21.3285		0.32791	1.67542	0.32781	-2.88012		0.24588	-0.91357	0.24585	-4.16591
0.47447	-21.1033	0.47391	-21.6869		0.28683	-21.5324	0.28672	-21.5329		0.28691	-21.4123	0.87366	-21.3283		0.38582	1.92585	0.38575	-2.84257		0.28686	-0.69159	0.28683	-4.37324
0.52235	-21.1029	0.5216	-21.6864		0.32781	-21.5323	0.32798	-21.5331		0.32765	-21.4122	0.91577	-21.3283		0.44373	1.91192	0.4437	-2.73231		0.32784	-0.43319	0.3278	-4.5435
0.57023	-21.1028	0.56929	-21.6862		0.37417	-21.5325	0.37437	-21.5331		0.37398	-21.4125	0.95789	-21.328		0.50164	1.54537	0.50164	-2.95794		0.37419	-0.68167	0.37416	-4.37471
0.62338	-21.1029	0.62223	-21.6864		0.42053	-21.533	0.42077	-21.5329		0.42032	-21.4132	1	-21.3277		0.55955	1.15829	0.55959	-3.02392		0.42053	-1.07389	0.42052	-4.28678
0.67654	-21.1034	0.67517	-21.687		0.46688	-21.5335	0.46716	-21.5322		0.46666	-21.4129	0	--		0.61098	1.49947	0.61105	-2.99134		0.46688	-0.78557	0.46688	-4.40917
0.72969	-21.1044	0.72811	-21.6877		0.51324	-21.5328	0.51355	-21.5318		0.51299	-21.4135	0	-21.3277		0.6624	1.84154	0.6625	-2.76347		0.51323	-0.56352	0.51324	-4.49758
0.77667	-21.1035	0.77451	-21.6877		0.5596	-21.5326	0.55994	-21.5313		0.55933	-21.4134	0.04211	-21.3275		0.71382	1.9267	0.71396	-2.86224		0.55958	-0.44405	0.5596	-4.54841
0.82366	-21.103	0.82091	-21.6878		0.61106	-21.5329	0.61144	-21.5317		0.61076	-21.4135	0.08423	-21.3278		0.77496	1.83455	0.77501	-2.64902		0.61103	-0.56101	0.61106	-4.49069
0.87064	-21.1029	0.86731	-21.688		0.66252	-21.5336	0.66293	-21.5324		0.6622	-21.4131	0.12634	-21.3281		0.8361	1.49389	0.83607	-2.6499		0.66247	-0.88503	0.66252	-4.33743
0.91376	-21.1028	0.91154	-21.6872		0.71398	-21.5328	0.71443	-21.533		0.71363	-21.4129	0.16845	-21.3274		0.89074	1.74773	0.89071	-2.70233		0.71392	-1.04959	0.71398	-4.22783
0.95688	-21.1028	0.95577	-21.6865		0.75468	-21.533	0.75531	-21.5317		0.75419	-21.4131	0.22124	-21.3274		0.94537	1.65008	0.94536	-2.95927		0.75464	-0.77368	0.75469	-4.16152
1	-21.1028	1	-21.6862		0.79539	-21.5332	0.79619	-21.5314		0.79475	-21.4133	0.27403	-21.3274		1	1.15829	1	-3.02392		0.79536	-1.28008	0.79539	-3.95291
0	--	0	--		0.8361	-21.5335	0.83707	-21.531		0.8353	-21.4135	0.32682	-21.3277		0	--	0	--		0.83608	-1.35289	0.8361	-4.0355
0	-11.423	0	-21.6841		0.87707	-21.5335	0.8778	-21.5312		0.87648	-21.4129	0.37306	-21.3278		0	1.6292	0	-2.9704		0.87706	-1.32106	0.87707	-3.97473
0.04312	-11.408	0.04423	-21.6841		0.91805	-21.5332	0.91853	-21.5311		0.91765	-21.4129	0.4193	-21.3279		0.05463	1.66091	0.05464	-2.92495		0.91804	-1.13812	0.91805	-4.28375
0.08624	-11.3636	0.08846	-21.6839		0.95902	-21.5327	0.95927	-21.5313		0.95883	-21.4135	0.46554	-21.3279		0.10926	1.78057	0.10929	-2.57263		0.95902	-0.79369	0.95902	-4.47563
0.12936	-11.2916	0.13269	-21.6837		1	-21.5326	1	-21.5313		1	-21.4134	0.51178	-21.3276		0.1639	1.62874	0.16393	-2.59829		1	-0.44405	1	-4.54841
0.17972	-11.2683	0.18222	-21.684		0	--	0	--		0	--	0.55802	-21.3277		0.21857	1.91083	0.21856	-2.67908		0	--	0	--
0.23009	-11.1994	0.23176	-21.685		0	-21.5325	0	-21.5308		0	-21.4122	0.60935	-21.3276		0.27324	2.01709	0.27318	-2.71276		0	-0.38419	0	-4.5281
0.28045	-11.0885	0.28129	-21.6863		0.04098	-21.5326	0.04073	-21.5312		0.04117	-21.4123	0.66068	-21.328		0.32791	1.68918	0.32781	-2.87963		0.04098	-0.40413	0.04098	-4.43228
0.33082	-10.9421	0.33083	-21.6872		0.08195	-21.5327	0.08147	-21.531		0.08235	-21.4125	0.71201	-21.3278		0.38582	1.94878	0.38575	-2.68999		0.08196	-0.82041	0.08195	-4.28227
0.3787	-11.1051	0.37852	-21.6867		0.12293	-21.533	0.1222	-21.5307		0.12352	-21.4129	0.75185	-21.3278		0.44373	1.91382	0.4437	-2.73194		0.12294	-1.27013	0.12293	-3.97318
0.42658	-11.2401	0.42621	-21.6858		0.1639	-21.5335	0.16293	-21.531		0.1647	-21.4135	0.7917	-21.3277		0.50164	1.72703	0.50164	-2.94751		0.16392	-1.32531	0.1639	-4.03411
0.47447	-11.3405	0.47391	-21.6849		0.20488	-21.533	0.20419	-21.5314		0.20544	-21.413	0.83155	-21.3274		0.55955	1.6292	0.55959	-2.9704		0.2049	-1.24019	0.20488	-3.93609
0.52235	-11.4022	0.5216	-21.6843		0.24586	-21.5326	0.24546	-21.532		0.24617	-21.4126	0.87366	-21.3281		0.61098	1.70714	0.61105	-2.95148		0.24588	-0.89834	0.24585	-4.16545
0.57023	-11.423	0.56929	-21.6841		0.28683	-21.5324	0.28672	-21.5328		0.28691	-21.4123	0.91577	-21.3278		0.6624	1.84364	0.6625	-2.76313		0.28686	-0.68561	0.28683	-4.37303
0.62338	-11.3973	0.62223	-21.6844		0.32781	-21.5323	0.32798	-21.5331		0.32765	-21.4122	0.95789	-21.3275		0.71382	2.02261	0.71396	-2.69269		0.32784	-0.42792	0.3278	-4.54318
0.67654	-11.3216	0.67517	-21.6851		0.37417	-21.5325	0.37437	-21.5331		0.37398	-21.4122	1	-21.3277		0.77496	1.88991	0.77501	-2.63925		0.37419	-0.55868	0.37416	-4.35147
0.72969	-11.1991	0.72811	-21.6861		0.42053	-21.533	0.42077	-21.5322		0.42032	-21.4124	0	--		0.8361	1.62874	0.83607	-2.59829		0.42053	-0.51988	0.42052	-4.26489
0.77667	-11.2687	0.77451	-21.6849		0.46688	-21.5332	0.46716	-21.5312		0.46666	-21.4129	0	-21.3273		0.89074	1.78057	0.89071	-2.57263		0.46688	-0.72918	0.46688	-4.30118
0.82366	-11.3	0.82091	-21.684		0.51324	-21.5326	0.51355	-21.531		0.51299	-21.4123	0.04211	-21.3274		0.94537	1.66091	0.94536	-2.92495		0.51323	-0.52983	0.51324	-4.36709
0.87064	-11.2916	0.86731	-21.6837		0.5596	-21.5325	0.55994	-21.5308		0.55933	-21.4122	0.08423	-21.3274		1	1.6292	1	-2.9704		0.55958	-0.38419	0.5596	-4.5281
0.91376	-11.3636	0.91154	-21.6839		0.61106	-21.5326	0.61144	-21.5311		0.61076	-21.4124	0.12634	-21.3274		0	--	0	--		0.61103	-0.53013	0.61106	-4.32658
0.95688	-11.408	0.95577	-21.6841		0.66252	-21.5333	0.66293	-21.5311		0.6622	-21.4128	0.16845	-21.3274		0	1.63363	0	-2.96482		0.66247	-0.82277	0.66252	-4.33717
1	-11.423	1	-21.6841		0.71398	-21.5328	0.71443	-21.5326		0.71363	-21.4123	0.22124	-21.3274		0.05463	1.90768	0.05464	-2.81633		0.71392	-0.44079	0.71398	-4.20588
0	--	0	--		0.75468	-21.533	0.75531	-21.5317		0.75419	-21.4123	0.27403	-21.3274		0.10926	1.7916	0.10929	-2.56324		0.75464	-0.74912	0.75469	-4.13903
0	-10.9483	0	-21.6839		0.79539	-21.5331	0.79619	-21.5312		0.79475	-21.4128	0.32682	-21.3277		0.1639	1.62874	0.16393	-2.59829		0.79536	-1.23581	0.79539	-3.91115
0.04312	-11.0782	0.04423	-21.6838		0.8361	-21.5335	0.83707	-21.531		0.8353	-21.4135	0.37306	-21.3273		0.21857	1.9168	0.21856	-2.67879		0.83608	-1.32531	0.8361	-4.03411
0.08624	-11.1949	0.08846	-21.6837		0.87707	-21.533	0.8778	-21.5307		0.87648	-21.4129	0.4193	-21.3277		0.27324	2.03049	0.27318	-2.71263		0.87706	-1.27013	0.87707	-3.97318
0.12936	-11.2916	0.13269	-21.6837		0.91805	-21.5327	0.91853	-21.531		0.91765	-21.4125	0.46554	-21.3276		0.32791	1.68918	0.32781	-2.87959		0.91804	-0.82041	0.91805	-4.28227
0.17972	-11.2683	0.18222	-21.684		0.95902	-21.5326	0.95927	-21.5312		0.95883	-21.4123	0.51178	-21.3274		0.38582	1.94962	0.38575	-2.68899		0.95902	-0.40413	0.95902	-4.43228
0.23009	-11.1994	0.23176	-21.685		1	-21.5325	1	-21.5308		1	-21.4122	0.55802	-21.3273		0.44373	1.93902	0.4437	-2.56075		1	-0.38419	1	-4.5281
0.28045	-11.0885	0.28129	-21.6863		0	--	0	--		0	--	0.60935	-21.3274		0.50164	1.88548	0.50164	-2.69692		0	--	0	--
0.33082	-10.9421	0.33083	-21.6872		0	-21.5324	0	-21.53		0	-21.4121	0.66068	-21.3276		0.55955	1.63363	0.55959	-2.96482		0	-0.38407	0	-4.52674
0.3787	-11.0104	0.37852	-21.6866		0.04098	-21.5324	0.04073	-21.5307		0.04117	-21.4122	0.71201	-21.3276		0.61098	1.83941	0.61105	-2.74023		0.04098	-0.40002	0.04098	-4.43082
0.42658	-11.0457	0.42621	-21.6856		0.08195	-21.5327	0.08147	-21.5307		0.08235	-21.4125	0.75185	-21.3275		0.6624	1.90902	0.6625	-2.53934		0.08196	-0.81642	0.08195	-4.14639
0.47447	-11.0467	0.47391	-21.6847		0.12293	-21.533	0.1222	-21.5305		0.12352	-21.4124	0.7917	-21.3274		0.71382	2.02388	0.71396	-2.69244		0.12294	-1.0823	0.12293	-3.76071
0.52235	-11.0134	0.5216	-21.6841		0.1639	-21.5331	0.16293	-21.5305		0.1647	-21.4121	0.83155	-21.3274		0.77496	1.96271	0.77501	-2.61989		0.16392	-0.71096	0.1639	-3.69583
0.57023	-10.9483	0.56929	-21.6839		0.20488	-21.5329	0.20419	-21.5303		0.20544	-21.4121	0.87366	-21.3274		0.8361	1.62874	0.83607	-2.59829		0.2049	-0.5023	0.20488	-3.72986
0.62338	-11.0187	0.62223	-21.6841		0.24586	-21.5326	0.24546	-21.5311		0.24617	-21.4121	0.91577	-21.3274		0.89074	1.7916	0.89071	-2.56324		0.24588	-0.41922	0.24585	-3.9274
0.67654	-11.0495	0.67517	-21.6849		0.28683	-21.5324	0.28672	-21.5321		0.28691	-21.4121	0.95789	-21.3274		0.94537	1.90768	0.94536	-2.81633		0.28686	-0.50644	0.28683	-4.30607
0.72969	-11.0378	0.72811	-21.6859		0.32781	-21.5323	0.32798	-21.5331		0.32765	-21.4122	1	-21.3273		1	1.63363	1	-2.96482		0.32784	-0.39688	0.3278	-4.5328
0.77667	-11.1578	0.77451	-21.6847		0.37417	-21.5324	0.37437	-21.5325		0.37398	-21.4121	0	--		0	--	0	--		0.37419	-0.43142	0.37416	-4.28049
0.82366	-11.2436	0.82091	-21.6838		0.42053	-21.5324	0.42077	-21.5315		0.42032	-21.4122	0	-21.3272		0	2.02994	0	-2.76874		0.42053	-0.44777	0.42052	-4.00452
0.87064	-11.2916	0.86731	-21.6837		0.46688	-21.5325	0.46716	-21.5309		0.46666	-21.4121	0.04211	-21.3265		0.05463	2.07436	0.05464	-2.81334		0.46688	-0.49799	0.46688	-4.27769
0.91376	-11.1949	0.91154	-21.6837		0.51324	-21.5325	0.51355	-21.5304		0.51299	-21.4121	0.08423	-21.3264		0.10926	2.01587	0.10929	-2.55255		0.51323	-0.30821	0.51324	-4.34428
0.95688	-11.0782	0.95577	-21.6838		0.5596	-21.5324	0.55994	-21.53		0.55933	-21.4121	0.12634	-21.3269		0.1639	1.89084	0.16393	-2.53712		0.55958	-0.38407	0.5596	-4.52674
1	-10.9483	1	-21.6839		0.61106	-21.5325	0.61144	-21.5304		0.61076	-21.4121	0.16845	-21.3273		0.21857	2.0237	0.21856	-2.59403		0.61103	-0.34831	0.61106	-4.30351
0	--	0	--		0.66252	-21.5325	0.66293	-21.5311		0.6622	-21.4121	0.22124	-21.3273		0.27324	2.09943	0.27318	-2.66427		0.66247	-0.48074	0.66252	-4.31396
0	-10.9473	0	-21.6838		0.71398	-21.5324	0.71443	-21.5318		0.71363	-21.4122	0.27403	-21.3271		0.32791	2.24631	0.32781	-2.69084		0.71392	-0.41675	0.71398	-4.09568
0.04312	-10.8122	0.04423	-21.6836		0.75468	-21.5325	0.75531	-21.5316		0.75419	-21.4123	0.32682	-21.3267		0.38582	2.1767	0.38575	-2.68895		0.75464	-0.51899	0.75469	-4.10618
0.08624	-10.6812	0.08846	-21.6834		0.79539	-21.5328	0.79619	-21.5305		0.79475	-21.4122	0.37306	-21.3271		0.44373	1.97129	0.4437	-2.45989		0.79536	-0.67212	0.79539	-3.89231
0.12936	-10.5657	0.13269	-21.6835		0.8361	-21.5331	0.83707	-21.5305		0.8353	-21.4121	0.4193	-21.3266		0.50164	1.89926	0.50164	-2.6174		0.83608	-0.71096	0.8361	-3.69583
0.17972	-10.5491	0.18222	-21.6839		0.87707	-21.533	0.8778	-21.5305		0.87648	-21.4124	0.46554	-21.3261		0.55955	2.02994	0.55959	-2.76874		0.87706	-1.0823	0.87707	-3.76071
0.23009	-10.5902	0.23176	-21.6848		0.91805	-21.5327	0.91853	-21.5307		0.91765	-21.4125	0.51178	-21.3267		0.61098	1.98693	0.61105	-2.65062		0.91804	-0.81642	0.91805	-4.14639
0.28045	-10.7708	0.28129	-21.6862		0.95902	-21.5324	0.95927	-21.5307		0.95883	-21.4122	0.55802	-21.3272		0.6624	1.95057	0.6625	-2.36403		0.95902	-0.40002	0.95902	-4.43082
0.33082	-10.9421	0.33083	-21.6872		1	-21.5324	1	-21.53		1	-21.4121	0.60935	-21.3266		0.71382	2.16184	0.71396	-2.65389		1	-0.38407	1	-4.52674
0.3787	-10.8447	0.37852	-21.6864		0	--	0	--		0	--	0.66068	-21.3262		0.77496	1.97876	0.77501	-2.59086		0	--	0	--
0.42658	-10.7239	0.42621	-21.6851		0	-21.5324	0	-21.5299		0	-21.4118	0.71201	-21.3268		0.8361	1.89084	0.83607	-2.53712		0	-0.32468	0	-3.88382
0.47447	-10.7364	0.47391	-21.6844		0.04098	-21.5324	0.04073	-21.5305		0.04117	-21.4118	0.75185	-21.327		0.89074	2.01587	0.89071	-2.55255		0.04098	0	0.04098	-4.16393
0.52235	-10.8535	0.5216	-21.6839		0.08195	-21.5327	0.08147	-21.5305		0.08235	-21.4119	0.7917	-21.3272		0.94537	2.07436	0.94536	-2.81334		0.08196	-0.0039	0.08195	-4.14474
0.57023	-10.9473	0.56929	-21.6838		0.12293	-21.5328	0.1222	-21.5304		0.12352	-21.4119	0.83155	-21.3273		1	2.02994	1	-2.76874		0.12294	-0.33472	0.12293	-3.76024
0.62338	-10.8416	0.62223	-21.684		0.1639	-21.5331	0.16293	-21.5305		0.1647	-21.4121	0.87366	-21.3269		0	--	0	--		0.16392	-0.70917	0.1639	-3.69521
0.67654	-10.7083	0.67517	-21.6846		0.20488	-21.5329	0.20419	-21.5303		0.20544	-21.4121	0.91577	-21.3264		0	2.04156	0	-2.76359		0.2049	-0.49983	0.20488	-3.72576
0.72969	-10.7658	0.72811	-21.6855		0.24586	-21.5326	0.24546	-21.531		0.24617	-21.4121	0.95789	-21.3265		0.05463	2.08567	0.05464	-2.36817		0.24588	-0.41203	0.24585	-3.92595
0.77667	-10.5861	0.77451	-21.6845		0.28683	-21.5324	0.28672	-21.5321		0.28691	-21.4121	1	-21.3272		0.10926	2.08787	0.10929	-2.24376		0.28686	-0.49604	0.28683	-4.30443
0.82366	-10.5884	0.82091	-21.6838		0.32781	-21.5323	0.32798	-21.5331		0.32765	-21.4121	0	--		0.1639	1.89085	0.16393	-2.53712		0.32784	-0.38712	0.3278	-4.52957
0.87064	-10.5657	0.86731	-21.6835		0.37417	-21.5323	0.37437	-21.5316		0.37398	-21.4121	0	-21.3269		0.21857	2.02934	0.21856	-2.59363		0.37419	-0.39819	0.37416	-4.27415
0.91376	-10.6812	0.91154	-21.6834		0.42053	-21.5323	0.42077	-21.5308		0.42032	-21.4121	0.04211	-21.3264		0.27324	2.1044	0.27318	-2.6641		0.42053	-0.43109	0.42052	-3.99665
0.95688	-10.8122	0.95577	-21.6836		0.46688	-21.5323	0.46716	-21.5308		0.46666	-21.4121	0.08423	-21.3257		0.32791	2.24632	0.32781	-2.69082		0.46688	-0.49011	0.46688	-3.88195
1	-10.9473	1	-21.6838		0.51324	-21.5324	0.51355	-21.5301		0.51299	-21.4119	0.12634	-21.3266		0.38582	2.23519	0.38575	-2.60292		0.51323	-0.26028	0.51324	-4.1071
0	--	0	--		0.5596	-21.5324	0.55994	-21.5299		0.55933	-21.4118	0.16845	-21.3272		0.44373	2.31451	0.4437	-2.29178		0.55958	-0.32468	0.5596	-3.88382
0	-10.3988	0	-21.6837		0.61106	-21.5324	0.61144	-21.53		0.61076	-21.4119	0.22124	-21.3272		0.50164	2.00326	0.50164	-2.61481		0.61103	-0.30244	0.61106	-4.13064
0.04312	-10.4184	0.04423	-21.6835		0.66252	-21.5323	0.66293	-21.531		0.6622	-21.4121	0.27403	-21.3271		0.55955	2.04156	0.55959	-2.76359		0.66247	-0.47867	0.66252	-3.80435
0.08624	-10.4755	0.08846	-21.6833		0.71398	-21.5323	0.71443	-21.5308		0.71363	-21.4121	0.32682	-21.3267		0.61098	2.01059	0.61105	-2.64809		0.71392	-0.41521	0.71398	-4.08729
0.12936	-10.5657	0.13269	-21.6835		0.75468	-21.5324	0.75531	-21.5305		0.75419	-21.412	0.37306	-21.3265		0.6624	2.25354	0.6625	-2.36056		0.75464	-0.50915	0.75469	-3.99812
0.17972	-10.5491	0.18222	-21.6838		0.79539	-21.5328	0.79619	-21.5303		0.79475	-21.412	0.4193	-21.3261		0.71382	2.27294	0.71396	-2.45864		0.79536	-0.40883	0.79539	-3.87017
0.23009	-10.5902	0.23176	-21.6848		0.8361	-21.5331	0.83707	-21.5305		0.8353	-21.4121	0.46554	-21.3259		0.77496	2.09794	0.77501	-2.45118		0.83608	-0.70917	0.8361	-3.69521
0.28045	-10.7708	0.28129	-21.6862		0.87707	-21.5328	0.8778	-21.5304		0.87648	-21.4119	0.51178	-21.3265		0.8361	1.89085	0.83607	-2.53712		0.87706	-0.33472	0.87707	-3.76024
0.33082	-10.9421	0.33083	-21.6872		0.91805	-21.5327	0.91853	-21.5305		0.91765	-21.4119	0.55802	-21.3269		0.89074	2.08787	0.89071	-2.24376		0.91804	-0.0039	0.91805	-4.14474
0.3787	-10.7614	0.37852	-21.6864		0.95902	-21.5324	0.95927	-21.5305		0.95883	-21.4118	0.60935	-21.3264		0.94537	2.08567	0.94536	-2.36817		0.95902	0	0.95902	-4.16393
0.42658	-10.6046	0.42621	-21.6851		1	-21.5324	1	-21.5299		1	-21.4118	0.66068	-21.3259		1	2.04156	1	-2.76359		1	-0.32468	1	-3.88382
0.47447	-10.5885	0.47391	-21.6843		0	--	0	--		0	--	0.71201	-21.3262		0	--	0	--		0	--	0	--
0.52235	-10.4507	0.5216	-21.6838		0	-11.9126	0	-21.5298		0	-11.8071	0.75185	-21.3266		0	2.49598	0	-2.7163		0	1.00057	0	-3.85979
0.57023	-10.3988	0.56929	-21.6837		0.04098	-11.8934	0.04073	-21.53		0.04117	-11.7879	0.7917	-21.327		0.05463	2.20972	0.05464	-2.34531		0.04098	0.76401	0.04098	-3.84811
0.62338	-10.4656	0.62223	-21.6839		0.08195	-11.8366	0.08147	-21.5302		0.08235	-11.7308	0.83155	-21.3272		0.10926	2.24306	0.10929	-2.22942		0.08196	0.87727	0.08195	-3.81378
0.67654	-10.619	0.67517	-21.6845		0.12293	-11.7442	0.1222	-21.5301		0.12352	-11.638	0.87366	-21.3266		0.1639	2.37134	0.16393	-2.36512		0.12294	1.34161	0.12293	-3.72275
0.72969	-10.6377	0.72811	-21.6855		0.1639	-11.6202	0.16293	-21.5297		0.1647	-11.5135	0.91577	-21.3257		0.21857	2.35463	0.21856	-2.36012		0.16392	1.31395	0.1639	-3.69441
0.77667	-10.5834	0.77451	-21.6844		0.20488	-11.6027	0.20419	-21.5301		0.20544	-11.4967	0.95789	-21.3264		0.27324	2.28549	0.27318	-2.56874		0.2049	1.32122	0.20488	-3.70478
0.82366	-10.5196	0.82091	-21.6837		0.24586	-11.5511	0.24546	-21.53		0.24617	-11.4469	1	-21.3269		0.32791	2.24694	0.32781	-2.69039		0.24588	1.08221	0.24585	-3.89243
0.87064	-10.5657	0.86731	-21.6835		0.28683	-11.4678	0.28672	-21.5298		0.28691	-11.3667	0	--		0.38582	2.23567	0.38575	-2.6017		0.28686	1.13406	0.28683	-3.9436
0.91376	-10.4755	0.91154	-21.6833		0.32781	-11.3577	0.32798	-21.5297		0.32765	-11.2607	0	-21.3256		0.44373	2.31527	0.4437	-2.28744		0.32784	1.09784	0.3278	-3.8688
0.95688	-10.4184	0.95577	-21.6835		0.37417	-11.5422	0.37437	-21.5303		0.37398	-11.4424	0.04211	-21.3258		0.50164	2.18093	0.50164	-2.2573		0.37419	1.05916	0.37416	-4.09242
1	-10.3988	1	-21.6837		0.42053	-11.6982	0.42077	-21.5306		0.42032	-11.5959	0.08423	-21.3255		0.55955	2.49598	0.55959	-2.7163		0.42053	0.96315	0.42052	-3.88896
0	--	0	--		0.46688	-11.8155	0.46716	-21.5304		0.46666	-11.7115	0.12634	-21.3251		0.61098	2.15397	0.61105	-2.31899		0.46688	0.87662	0.46688	-3.85636
0	-10.326	0	-21.683		0.51324	-11.8881	0.51355	-21.5299		0.51299	-11.783	0.16845	-21.3247		0.6624	2.31859	0.6625	-2.3214		0.51323	0.86267	0.51324	-4.0833
0.04312	-10.3215	0.04423	-21.6831		0.5596	-11.9126	0.55994	-21.5298		0.55933	-11.8071	0.22124	-21.3251		0.71382	2.3082	0.71396	-2.45771		0.55958	1.00057	0.5596	-3.85979
0.08624	-10.309	0.08846	-21.6832		0.61106	-11.8824	0.61144	-21.5299		0.61076	-11.7774	0.27403	-21.3258		0.77496	2.318	0.77501	-2.3917		0.61103	0.87439	0.61106	-4.10687
0.12936	-10.2916	0.13269	-21.683		0.66252	-11.7934	0.66293	-21.5305		0.6622	-11.6897	0.32682	-21.3266		0.8361	2.37134	0.83607	-2.36512		0.66247	0.889	0.66252	-3.79632
0.17972	-10.422	0.18222	-21.6833		0.71398	-11.6506	0.71443	-21.5307		0.71363	-11.5491	0.37306	-21.3263		0.89074	2.24306	0.89071	-2.22942		0.71392	1.00176	0.71398	-4.07582
0.23009	-10.5013	0.23176	-21.6843		0.75468	-11.6751	0.75531	-21.5304		0.75419	-11.5709	0.4193	-21.326		0.94537	2.20972	0.94536	-2.34531		0.75464	1.09419	0.75469	-3.88422
0.28045	-10.4289	0.28129	-21.6856		0.79539	-11.6649	0.79619	-21.5301		0.79475	-11.5589	0.46554	-21.3257		1	2.49598	1	-2.7163		0.79536	1.18971	0.79539	-3.86398
0.33082	-10.344	0.33083	-21.6872		0.8361	-11.6202	0.83707	-21.5297		0.8353	-11.5135	0.51178	-21.3258		0	--	0	--		0.83608	1.31395	0.8361	-3.69441
0.3787	-10.4692	0.37852	-21.6861		0.87707	-11.7442	0.8778	-21.5301		0.87648	-11.638	0.55802	-21.3256		0	2.51609	0	-2.71315		0.87706	1.34161	0.87707	-3.72275
0.42658	-10.5781	0.42621	-21.6851		0.91805	-11.8366	0.91853	-21.5302		0.91765	-11.7308	0.60935	-21.3258		0.05463	2.22545	0.05464	-2.30911		0.91804	0.87727	0.91805	-3.81378
0.47447	-10.4144	0.47391	-21.684		0.95902	-11.8934	0.95927	-21.53		0.95883	-11.7879	0.66068	-21.3255		0.10926	2.25442	0.10929	-2.21762		0.95902	0.76401	0.95902	-3.84811
0.52235	-10.3968	0.5216	-21.6832		1	-11.9126	1	-21.5298		1	-11.8071	0.71201	-21.3261		0.1639	2.37134	0.16393	-2.36511		1	1.00057	1	-3.85979
0.57023	-10.326	0.56929	-21.683		0	--	0	--		0	--	0.75185	-21.3255		0.21857	2.36819	0.21856	-2.35987		0	--	0	--
0.62338	-10.3963	0.62223	-21.6833		0	-10.9833	0	-21.5298		0	-10.9111	0.7917	-21.325		0.27324	2.29367	0.27318	-2.56794		0	1.01273	0	-3.85951
0.67654	-10.4474	0.67517	-21.6842		0.04098	-11.1372	0.04073	-21.5293		0.04117	-11.0299	0.83155	-21.3247		0.32791	2.24695	0.32781	-2.69039		0.04098	0.83183	0.04098	-3.84776
0.72969	-10.5597	0.72811	-21.6854		0.08195	-11.3054	0.08147	-21.5296		0.08235	-11.198	0.87366	-21.3251		0.38582	2.2536	0.38575	-2.49496		0.08196	1.09945	0.08195	-3.81338
0.77667	-10.5121	0.77451	-21.6842		0.12293	-11.4708	0.1222	-21.5299		0.12352	-11.3637	0.91577	-21.3255		0.44373	2.36753	0.4437	-2.15372		0.12294	1.36478	0.12293	-3.72097
0.82366	-10.4174	0.82091	-21.6833		0.1639	-11.6202	0.16293	-21.5297		0.1647	-11.5135	0.95789	-21.3258		0.50164	2.40499	0.50164	-2.25596		0.16392	1.33606	0.1639	-3.6939
0.87064	-10.2916	0.86731	-21.683		0.20488	-11.6027	0.20419	-21.5301		0.20544	-11.4967	1	-21.3256		0.55955	2.51609	0.55959	-2.71315		0.2049	1.32783	0.20488	-3.70467
0.91376	-10.309	0.91154	-21.6832		0.24586	-11.5511	0.24546	-21.53		0.24617	-11.4469	0	--		0.61098	2.42558	0.61105	-2.31783		0.24588	1.08484	0.24585	-3.88993
0.95688	-10.3215	0.95577	-21.6831		0.28683	-11.4678	0.28672	-21.5298		0.28691	-11.3667	0	-21.3255		0.6624	2.31935	0.6625	-2.1172		0.28686	1.13844	0.28683	-3.94211
1	-10.326	1	-21.683		0.32781	-11.3577	0.32798	-21.5297		0.32765	-11.2607	0.04211	-21.3257		0.71382	2.30866	0.71396	-2.34912		0.32784	1.10021	0.3278	-3.86834
0	--	0	--		0.37417	-11.3392	0.37437	-21.5303		0.37398	-11.2468	0.08423	-21.3255		0.77496	2.41994	0.77501	-2.3655		0.37419	1.0752	0.37416	-4.07034
0	-10.326	0	-21.683		0.42053	-11.2854	0.42077	-21.5305		0.42032	-11.1982	0.12634	-21.3246		0.8361	2.37134	0.83607	-2.36511		0.42053	0.97311	0.42052	-3.86182
0.04312	-10.3214	0.04423	-21.6831		0.46688	-11.2015	0.46716	-21.5298		0.46666	-11.1198	0.16845	-21.3247		0.89074	2.25442	0.89071	-2.21762		0.46688	0.92219	0.46688	-3.75353
0.08624	-10.309	0.08846	-21.6832		0.51324	-11.0965	0.51355	-21.5296		0.51299	-11.0201	0.22124	-21.325		0.94537	2.22545	0.94536	-2.30911		0.51323	0.8722	0.51324	-3.61044
0.12936	-10.2916	0.13269	-21.683		0.5596	-10.9833	0.55994	-21.5298		0.55933	-10.9111	0.27403	-21.3258		1	2.51609	1	-2.71315		0.55958	1.01273	0.5596	-3.85951
0.17972	-10.422	0.18222	-21.6833		0.61106	-11.1087	0.61144	-21.5296		0.61076	-11.0318	0.32682	-21.3266		0	--	0	--		0.61103	0.9146	0.61106	-3.58811
0.23009	-10.5012	0.23176	-21.6843		0.66252	-11.2221	0.66293	-21.5299		0.6622	-11.1393	0.37306	-21.326		0	2.62171	0	-2.03383		0.66247	0.92651	0.66252	-3.74562
0.28045	-10.4289	0.28129	-21.6856		0.71398	-11.3068	0.71443	-21.5306		0.71363	-11.2179	0.4193	-21.3255		0.05463	2.33448	0.05464	-2.11329		0.71392	1.00193	0.71398	-4.04887
0.33082	-10.344	0.33083	-21.6872		0.75468	-11.4365	0.75531	-21.5302		0.75419	-11.3314	0.46554	-21.3255		0.10926	2.44543	0.10929	-2.1638		0.75464	1.22315	0.75469	-3.72069
0.3787	-10.3641	0.37852	-21.6861		0.79539	-11.5429	0.79619	-21.53		0.79475	-11.4365	0.51178	-21.3257		0.1639	2.38	0.16393	-2.14267		0.79536	1.32385	0.79539	-3.49918
0.42658	-10.3797	0.42621	-21.6851		0.8361	-11.6202	0.83707	-21.5297		0.8353	-11.5135	0.55802	-21.3255		0.21857	2.42515	0.21856	-2.32214		0.83608	1.33606	0.8361	-3.6939
0.47447	-10.3905	0.47391	-21.684		0.87707	-11.4708	0.8778	-21.5299		0.87648	-11.3637	0.60935	-21.3257		0.27324	2.48373	0.27318	-2.5459		0.87706	1.36478	0.87707	-3.72097
0.52235	-10.2979	0.5216	-21.6832		0.91805	-11.3054	0.91853	-21.5296		0.91765	-11.198	0.66068	-21.3255		0.32791	2.46088	0.32781	-2.31166		0.91804	1.09945	0.91805	-3.81338
0.57023	-10.326	0.56929	-21.683		0.95902	-11.1372	0.95927	-21.5293		0.95883	-11.0299	0.71201	-21.3256		0.38582	2.38835	0.38575	-2.47628		0.95902	0.83183	0.95902	-3.84776
0.62338	-10.3075	0.62223	-21.6833		1	-10.9833	1	-21.5298		1	-10.9111	0.75185	-21.3251		0.44373	2.4112	0.4437	-2.15055		1	1.01273	1	-3.85951
0.67654	-10.3885	0.67517	-21.6842		0	--	0	--		0	--	0.7917	-21.3248		0.50164	2.40586	0.50164	-2.16083		0	--	0	--
0.72969	-10.375	0.72811	-21.6854		0	-10.9833	0	-21.5295		0	-10.9106	0.83155	-21.3247		0.55955	2.62171	0.55959	-2.03383		0	1.0287	0	-3.83581
0.77667	-10.4538	0.77451	-21.6842		0.04098	-10.9721	0.04073	-21.5293		0.04117	-10.8995	0.87366	-21.3246		0.61098	2.42648	0.61105	-2.14239		0.04098	0.8378	0.04098	-3.53787
0.82366	-10.3918	0.82091	-21.6833		0.08195	-10.94	0.08147	-21.5291		0.08235	-10.8661	0.91577	-21.3255		0.6624	2.36685	0.6625	-2.09895		0.08196	1.32024	0.08195	-3.56511
0.87064	-10.2916	0.86731	-21.683		0.12293	-10.8905	0.1222	-21.5296		0.12352	-10.8146	0.95789	-21.3257		0.71382	2.35112	0.71396	-2.349		0.12294	1.36978	0.12293	-3.62674
0.91376	-10.309	0.91154	-21.6832		0.1639	-10.83	0.16293	-21.5295		0.1647	-10.7515	1	-21.3255		0.77496	2.42125	0.77501	-2.26114		0.16392	1.94125	0.1639	-3.56583
0.95688	-10.3214	0.95577	-21.6831		0.20488	-10.9502	0.20419	-21.5297		0.20544	-10.8681	0	--		0.8361	2.38	0.83607	-2.14267		0.2049	1.3351	0.20488	-3.63727
1	-10.326	1	-21.683		0.24586	-11.0876	0.24546	-21.5297		0.24617	-11.0007	0	-21.3254		0.89074	2.44543	0.89071	-2.1638		0.24588	1.31354	0.24585	-3.86766
0	--	0	--		0.28683	-11.2276	0.28672	-21.5297		0.28691	-11.1355	0.04211	-21.325		0.94537	2.33448	0.94536	-2.11329		0.28686	1.37869	0.28683	-3.92053
0	-10.2552	0	-21.6828		0.32781	-11.3576	0.32798	-21.5297		0.32765	-11.2607	0.08423	-21.3255		1	2.62171	1	-2.03383		0.32784	1.1236	0.3278	-3.84619
0.04312	-10.2602	0.04423	-21.6828		0.37417	-11.3392	0.37437	-21.5291		0.37398	-11.2383	0.12634	-21.3245		0	--	0	--		0.37419	1.20368	0.37416	-3.70482
0.08624	-10.2737	0.08846	-21.6828		0.42053	-11.2854	0.42077	-21.5285		0.42032	-11.1816	0.16845	-21.324		0	2.62426	0	-2.03186		0.42053	1.37569	0.42052	-3.75251
0.12936	-10.2916	0.13269	-21.6829		0.46688	-11.2015	0.46716	-21.5293		0.46666	-11.0956	0.22124	-21.324		0.05463	2.57763	0.05464	-2.10803		0.46688	1.30258	0.46688	-3.74544
0.17972	-10.2207	0.18222	-21.6833		0.51324	-11.0965	0.51355	-21.5293		0.51299	-10.9897	0.27403	-21.3239		0.10926	2.48176	0.10929	-2.0482		0.51323	0.9043	0.51324	-3.58616
0.23009	-10.216	0.23176	-21.6842		0.5596	-10.9833	0.55994	-21.5295		0.55933	-10.9106	0.32682	-21.3237		0.1639	2.38001	0.16393	-2.14267		0.55958	1.0287	0.5596	-3.83581
0.28045	-10.2651	0.28129	-21.6856		0.61106	-11.1087	0.61144	-21.5294		0.61076	-11.002	0.37306	-21.3242		0.21857	2.43351	0.21856	-2.32089		0.61103	0.93215	0.61106	-3.581
0.33082	-10.344	0.33083	-21.6871		0.66252	-11.2221	0.66293	-21.5291		0.6622	-11.1166	0.4193	-21.3249		0.27324	2.49273	0.27318	-2.54553		0.66247	1.37109	0.66252	-3.71934
0.3787	-10.3208	0.37852	-21.6859		0.71398	-11.3068	0.71443	-21.5286		0.71363	-11.2039	0.46554	-21.3253		0.32791	2.4609	0.32781	-2.31165		0.71392	1.21226	0.71398	-3.48101
0.42658	-10.2968	0.42621	-21.6846		0.75468	-11.1341	0.75531	-21.5293		0.75419	-11.0498	0.51178	-21.3252		0.38582	2.38901	0.38575	-2.05678		0.75464	1.36107	0.75469	-3.68728
0.47447	-10.2754	0.47391	-21.6836		0.79539	-10.97	0.79619	-21.5297		0.79475	-10.8893	0.55802	-21.3254		0.44373	2.4906	0.4437	-2.14722		0.79536	1.34619	0.79539	-3.49452
0.52235	-10.2606	0.5216	-21.683		0.8361	-10.83	0.83707	-21.5295		0.8353	-10.7515	0.60935	-21.3251		0.50164	2.63687	0.50164	-2.0489		0.83608	1.94125	0.8361	-3.56583
0.57023	-10.2552	0.56929	-21.6828		0.87707	-10.8905	0.8778	-21.5296		0.87648	-10.8146	0.66068	-21.3252		0.55955	2.62426	0.55959	-2.03186		0.87706	1.36978	0.87707	-3.62674
0.62338	-10.2618	0.62223	-21.6831		0.91805	-10.94	0.91853	-21.5291		0.91765	-10.8661	0.71201	-21.3246		0.61098	2.61233	0.61105	-2.04483		0.91804	1.32024	0.91805	-3.56511
0.67654	-10.2797	0.67517	-21.6838		0.95902	-10.9721	0.95927	-21.5293		0.95883	-10.8995	0.75185	-21.3244		0.6624	2.56152	0.6625	-2.05927		0.95902	0.8378	0.95902	-3.53787
0.72969	-10.3046	0.72811	-21.685		1	-10.9833	1	-21.5295		1	-10.9106	0.7917	-21.3242		0.71382	2.35191	0.71396	-2.06126		1	1.0287	1	-3.83581
0.77667	-10.2344	0.77451	-21.6839		0	--	0	--		0	--	0.83155	-21.324		0.77496	2.4597	0.77501	-2.22502		0	--	0	--
0.82366	-10.2274	0.82091	-21.6832		0	-10.9831	0	-21.5294		0	-10.8768	0.87366	-21.3245		0.8361	2.38001	0.83607	-2.14267		0	1.03272	0	-3.50693
0.87064	-10.2916	0.86731	-21.6829		0.04098	-10.972	0.04073	-21.5289		0.04117	-10.899	0.91577	-21.3255		0.89074	2.48176	0.89071	-2.0482		0.04098	0.9546	0.04098	-3.52235
0.91376	-10.2737	0.91154	-21.6828		0.08195	-10.9398	0.08147	-21.5289		0.08235	-10.8656	0.95789	-21.325		0.94537	2.57763	0.94536	-2.10803		0.08196	1.33319	0.08195	-3.56472
0.95688	-10.2602	0.95577	-21.6828		0.12293	-10.8904	0.1222	-21.529		0.12352	-10.8141	1	-21.3254		1	2.62426	1	-2.03186		0.12294	1.46029	0.12293	-3.62619
1	-10.2552	1	-21.6828		0.1639	-10.83	0.16293	-21.5295		0.1647	-10.7515	0	--		0	--	0	--		0.16392	1.94655	0.1639	-3.56288
0	--	0	--		0.20488	-10.9502	0.20419	-21.5297		0.20544	-10.8681	0	-21.3249		0	2.62499	0	-1.87872		0.2049	1.34167	0.20488	-3.63487
0	-10.2552	0	-21.6828		0.24586	-11.0875	0.24546	-21.5297		0.24617	-11.0007	0.04211	-21.3248		0.05463	2.58188	0.05464	-1.97927		0.24588	1.32552	0.24585	-3.86747
0.04312	-10.2602	0.04423	-21.6827		0.28683	-11.2276	0.28672	-21.5297		0.28691	-11.1355	0.08423	-21.3245		0.10926	2.48772	0.10929	-2.01609		0.28686	1.38096	0.28683	-3.91967
0.08624	-10.2736	0.08846	-21.6828		0.32781	-11.3576	0.32798	-21.5297		0.32765	-11.2607	0.12634	-21.3244		0.1639	3.01396	0.16393	-2.01895		0.32784	1.12559	0.3278	-3.8458
0.12936	-10.2915	0.13269	-21.6829		0.37417	-11.1592	0.37437	-21.5289		0.37398	-11.0654	0.16845	-21.3239		0.21857	2.81359	0.21856	-2.28881		0.37419	1.27418	0.37416	-3.68079
0.17972	-10.2207	0.18222	-21.6833		0.42053	-10.9672	0.42077	-21.5284		0.42032	-10.8762	0.22124	-21.3239		0.27324	2.49722	0.27318	-2.07253		0.42053	1.41395	0.42052	-3.32734
0.23009	-10.216	0.23176	-21.6842		0.46688	-10.8112	0.46716	-21.5287		0.46666	-10.7174	0.27403	-21.3238		0.32791	2.46995	0.32781	-2.31144		0.46688	1.37114	0.46688	-3.39519
0.28045	-10.2651	0.28129	-21.6856		0.51324	-10.8764	0.51355	-21.5292		0.51299	-10.8058	0.32682	-21.3236		0.38582	2.51873	0.38575	-2.05547		0.51323	0.97137	0.51324	-3.57306
0.33082	-10.344	0.33083	-21.6871		0.5596	-10.9831	0.55994	-21.5294		0.55933	-10.8768	0.37306	-21.3238		0.44373	2.64595	0.4437	-2.02165		0.55958	1.03272	0.5596	-3.50693
0.3787	-10.2449	0.37852	-21.6858		0.61106	-10.8656	0.61144	-21.5292		0.61076	-10.7951	0.4193	-21.3243		0.50164	2.77108	0.50164	-1.87401		0.61103	0.96527	0.61106	-3.58009
0.42658	-10.1875	0.42621	-21.6846		0.66252	-10.8371	0.66293	-21.5286		0.6622	-10.7479	0.46554	-21.3251		0.55955	2.62499	0.55959	-1.87872		0.66247	1.40799	0.66252	-3.37508
0.47447	-10.1824	0.47391	-21.6836		0.71398	-11.0284	0.71443	-21.5284		0.71363	-10.9365	0.51178	-21.3249		0.61098	2.79444	0.61105	-1.8881		0.71392	1.36431	0.71398	-3.43413
0.52235	-10.2314	0.5216	-21.683		0.75468	-10.9688	0.75531	-21.5288		0.75419	-10.8816	0.55802	-21.3249		0.6624	2.74125	0.6625	-2.0567		0.75464	1.37345	0.75469	-3.47586
0.57023	-10.2552	0.56929	-21.6828		0.79539	-10.8997	0.79619	-21.5293		0.79475	-10.8171	0.60935	-21.3249		0.71382	2.50046	0.71396	-2.05847		0.79536	1.62028	0.79539	-3.47607
0.62338	-10.2236	0.62223	-21.683		0.8361	-10.83	0.83707	-21.5295		0.8353	-10.7515	0.66068	-21.3252		0.77496	2.66127	0.77501	-2.17914		0.83608	1.94655	0.8361	-3.56288
0.67654	-10.1788	0.67517	-21.6838		0.87707	-10.8904	0.8778	-21.529		0.87648	-10.8141	0.71201	-21.3241		0.8361	3.01396	0.83607	-2.01895		0.87706	1.46029	0.87707	-3.62619
0.72969	-10.201	0.72811	-21.685		0.91805	-10.9398	0.91853	-21.5289		0.91765	-10.8656	0.75185	-21.3239		0.89074	2.48772	0.89071	-2.01609		0.91804	1.33319	0.91805	-3.56472
0.77667	-10.1947	0.77451	-21.6839		0.95902	-10.972	0.95927	-21.5289		0.95883	-10.899	0.7917	-21.3238		0.94537	2.58188	0.94536	-1.97927		0.95902	0.9546	0.95902	-3.52235
0.82366	-10.2239	0.82091	-21.6832		1	-10.9831	1	-21.5294		1	-10.8768	0.83155	-21.3239		1	2.62499	1	-1.87872		1	1.03272	1	-3.50693
0.87064	-10.2915	0.86731	-21.6829		0	--	0	--		0	--	0.87366	-21.3244		0	--	0	--		0	--	0	--
0.91376	-10.2736	0.91154	-21.6828		0	-10.9831	0	-21.5294		0	-10.8762	0.91577	-21.3245		0	2.62592	0	-1.87801		0	1.10329	0	-3.50651
0.95688	-10.2602	0.95577	-21.6827		0.04098	-10.8616	0.04073	-21.5288		0.04117	-10.7562	0.95789	-21.3248		0.05463	2.94887	0.05464	-1.85032		0.04098	1.35089	0.04098	-3.52194
1	-10.2552	1	-21.6828		0.08195	-10.8207	0.08147	-21.5287		0.08235	-10.7236	1	-21.3249		0.10926	2.88133	0.10929	-1.9646		0.08196	1.42088	0.08195	-3.38424
0	--	0	--		0.12293	-10.7903	0.1222	-21.5288		0.12352	-10.692	0	--		0.1639	3.01397	0.16393	-2.01895		0.12294	2.0843	0.12293	-3.48904
0	-6.85972	0	-21.6771		0.1639	-10.8299	0.16293	-21.529		0.1647	-10.751	0	-21.3243		0.21857	2.81708	0.21856	-2.28784		0.16392	1.95618	0.1639	-3.55983
0.04312	-6.83029	0.04423	-21.6771		0.20488	-10.7563	0.20419	-21.5286		0.20544	-10.6624	0.04211	-21.3247		0.27324	2.50003	0.27318	-2.07099		0.2049	2.03358	0.20488	-3.45383
0.08624	-6.74746	0.08846	-21.6771		0.24586	-10.7361	0.24546	-21.5281		0.24617	-10.6395	0.08423	-21.3244		0.32791	2.46996	0.32781	-2.31141		0.24588	1.7744	0.24585	-3.27967
0.12936	-6.62775	0.13269	-21.6771		0.28683	-10.7086	0.28672	-21.5278		0.28691	-10.6159	0.12634	-21.3238		0.38582	2.66515	0.38575	-2.03726		0.28686	1.45806	0.28683	-3.63005
0.17972	-6.68123	0.18222	-21.6769		0.32781	-10.6831	0.32798	-21.5276		0.32765	-10.5953	0.16845	-21.3235		0.44373	2.64621	0.4437	-2.00159		0.32784	1.62118	0.3278	-3.84536
0.23009	-6.65976	0.23176	-21.6764		0.37417	-10.7224	0.37437	-21.5279		0.37398	-10.6325	0.22124	-21.3234		0.50164	2.80977	0.50164	-1.87384		0.37419	1.6079	0.37416	-3.6797
0.28045	-6.5949	0.28129	-21.6757		0.42053	-10.7685	0.42077	-21.5282		0.42032	-10.6763	0.27403	-21.3234		0.55955	2.62592	0.55959	-1.87801		0.42053	1.57228	0.42052	-3.30467
0.33082	-6.5278	0.33083	-21.6751		0.46688	-10.8054	0.46716	-21.5282		0.46666	-10.717	0.32682	-21.3236		0.61098	2.79638	0.61105	-1.88788		0.46688	1.42176	0.46688	-3.36859
0.3787	-6.61289	0.37852	-21.6756		0.51324	-10.8764	0.51355	-21.529		0.51299	-10.7711	0.37306	-21.3235		0.6624	2.74132	0.6625	-1.94029		0.51323	1.29184	0.51324	-3.56389
0.42658	-6.70272	0.42621	-21.6761		0.5596	-10.9831	0.55994	-21.5294		0.55933	-10.8762	0.4193	-21.3242		0.71382	2.70349	0.71396	-2.04146		0.55958	1.10329	0.5596	-3.50651
0.47447	-6.78338	0.47391	-21.6766		0.61106	-10.8656	0.61144	-21.5289		0.61076	-10.7605	0.46554	-21.3247		0.77496	2.76532	0.77501	-2.16239		0.61103	1.33753	0.61106	-3.55527
0.52235	-6.83957	0.5216	-21.677		0.66252	-10.8027	0.66293	-21.5281		0.6622	-10.7088	0.51178	-21.3246		0.8361	3.01397	0.83607	-2.01895		0.66247	1.45648	0.66252	-3.36512
0.57023	-6.85972	0.56929	-21.6771		0.71398	-10.7532	0.71443	-21.5283		0.71363	-10.6617	0.55802	-21.3243		0.89074	2.88133	0.89071	-1.9646		0.71392	1.59661	0.71398	-3.4142
0.62338	-6.835	0.62223	-21.6769		0.75468	-10.7641	0.75531	-21.5285		0.75419	-10.6685	0.60935	-21.3247		0.94537	2.94887	0.94536	-1.85032		0.75464	1.4285	0.75469	-3.45026
0.67654	-6.76722	0.67517	-21.6765		0.79539	-10.7698	0.79619	-21.5288		0.79475	-10.6936	0.66068	-21.3246		1	2.62592	1	-1.87801		0.79536	1.99405	0.79539	-3.46829
0.72969	-6.67333	0.72811	-21.6759		0.8361	-10.8299	0.83707	-21.529		0.8353	-10.751	0.71201	-21.3239		0	--	0	--		0.83608	1.95618	0.8361	-3.55983
0.77667	-6.72349	0.77451	-21.6765		0.87707	-10.7903	0.8778	-21.5288		0.87648	-10.692	0.75185	-21.3238		0	2.88111	0	-1.85407		0.87706	2.0843	0.87707	-3.48904
0.82366	-6.71492	0.82091	-21.6769		0.91805	-10.8207	0.91853	-21.5287		0.91765	-10.7236	0.7917	-21.3236		0.05463	3.07786	0.05464	-1.81609		0.91804	1.42088	0.91805	-3.38424
0.87064	-6.62775	0.86731	-21.6771		0.95902	-10.8616	0.95927	-21.5288		0.95883	-10.7562	0.83155	-21.3235		0.10926	3.27098	0.10929	-1.90344		0.95902	1.35089	0.95902	-3.52194
0.91376	-6.74746	0.91154	-21.6771		1	-10.9831	1	-21.5294		1	-10.8762	0.87366	-21.3238		0.1639	3.02525	0.16393	-2.01522		1	1.10329	1	-3.50651
0.95688	-6.83029	0.95577	-21.6771		0	--	0	--		0	--	0.91577	-21.3244		0.21857	3.03926	0.21856	-1.67695		0	--	0	--
1	-6.85972	1	-21.6771		0	-10.8516	0	-21.5282		0	-10.7555	0.95789	-21.3247		0.27324	3.10085	0.27318	-1.83563		0	1.11522	0	-3.49832
0	--	0	--		0.04098	-10.8434	0.04073	-21.5287		0.04117	-10.747	1	-21.3243		0.32791	3.25362	0.32781	-1.7964		0.04098	1.4135	0.04098	-3.46972
0	-6.85969	0	-21.6763		0.08195	-10.7855	0.08147	-21.5285		0.08235	-10.6819	0	--		0.38582	2.86422	0.38575	-1.93862		0.08196	1.43824	0.08195	-3.23008
0.04312	-6.83027	0.04423	-21.6764		0.12293	-10.767	0.1222	-21.5286		0.12352	-10.6855	0	-21.3233		0.44373	2.942	0.4437	-1.97493		0.12294	2.08956	0.12293	-3.48719
0.08624	-6.74741	0.08846	-21.6768		0.1639	-10.8299	0.16293	-21.529		0.1647	-10.751	0.04211	-21.3233		0.50164	2.81039	0.50164	-1.86713		0.16392	1.96588	0.1639	-3.55957
0.12936	-6.62774	0.13269	-21.677		0.20488	-10.7563	0.20419	-21.5285		0.20544	-10.6624	0.08423	-21.3232		0.55955	2.88111	0.55959	-1.85407		0.2049	2.04511	0.20488	-3.45349
0.17972	-6.68122	0.18222	-21.6769		0.24586	-10.7361	0.24546	-21.5281		0.24617	-10.6395	0.12634	-21.3234		0.61098	2.79703	0.61105	-1.81715		0.24588	1.78316	0.24585	-3.27688
0.23009	-6.65974	0.23176	-21.6764		0.28683	-10.7086	0.28672	-21.5278		0.28691	-10.6159	0.16845	-21.3234		0.6624	2.86314	0.6625	-1.89211		0.28686	1.46051	0.28683	-3.62824
0.28045	-6.59489	0.28129	-21.6757		0.32781	-10.6831	0.32798	-21.5276		0.32765	-10.5952	0.22124	-21.3233		0.71382	2.84348	0.71396	-1.87809		0.32784	1.62131	0.3278	-3.84357
0.33082	-6.52777	0.33083	-21.6751		0.37417	-10.694	0.37437	-21.5277		0.37398	-10.6125	0.27403	-21.3234		0.77496	3.0075	0.77501	-1.8245		0.37419	1.63828	0.37416	-3.65623
0.3787	-6.53578	0.37852	-21.6756		0.42053	-10.7282	0.42077	-21.5279		0.42032	-10.6525	0.32682	-21.3235		0.8361	3.02525	0.83607	-2.01522		0.42053	1.59684	0.42052	-3.26414
0.42658	-6.53023	0.42621	-21.6759		0.46688	-10.789	0.46716	-21.5282		0.46666	-10.7166	0.37306	-21.3232		0.89074	3.27098	0.89071	-1.90344		0.46688	1.62947	0.46688	-3.33924
0.47447	-6.65409	0.47391	-21.6761		0.51324	-10.841	0.51355	-21.5288		0.51299	-10.7454	0.4193	-21.3232		0.94537	3.07786	0.94536	-1.81609		0.51323	1.39721	0.51324	-3.47881
0.52235	-6.80478	0.5216	-21.6761		0.5596	-10.8516	0.55994	-21.5282		0.55933	-10.7555	0.46554	-21.3231		1	2.88111	1	-1.85407		0.55958	1.11522	0.5596	-3.49832
0.57023	-6.85969	0.56929	-21.6763		0.61106	-10.8386	0.61144	-21.5287		0.61076	-10.743	0.51178	-21.3232		0	--	0	--		0.61103	1.43765	0.61106	-3.47228
0.62338	-6.79239	0.62223	-21.6761		0.66252	-10.7733	0.66293	-21.528		0.6622	-10.701	0.55802	-21.3233		0	2.88729	0	-1.85376		0.66247	1.61763	0.66252	-3.34134
0.67654	-6.61124	0.67517	-21.6761		0.71398	-10.7141	0.71443	-21.5277		0.71363	-10.6366	0.60935	-21.3232		0.05463	3.08723	0.05464	-1.8134		0.71392	1.63687	0.71398	-3.40783
0.72969	-6.53406	0.72811	-21.6758		0.75468	-10.7336	0.75531	-21.528		0.75419	-10.6535	0.66068	-21.3231		0.10926	3.28136	0.10929	-1.80781		0.75464	1.58693	0.75469	-3.29612
0.77667	-6.60506	0.77451	-21.6764		0.79539	-10.7682	0.79619	-21.5284		0.79475	-10.6698	0.71201	-21.3232		0.1639	3.02525	0.16393	-2.01521		0.79536	2.12976	0.79539	-3.46762
0.82366	-6.64167	0.82091	-21.6768		0.8361	-10.8299	0.83707	-21.529		0.8353	-10.751	0.75185	-21.3234		0.21857	3.0414	0.21856	-1.67584		0.83608	1.96588	0.8361	-3.55957
0.87064	-6.62774	0.86731	-21.677		0.87707	-10.767	0.8778	-21.5286		0.87648	-10.6855	0.7917	-21.3234		0.27324	3.10444	0.27318	-1.83531		0.87706	2.08956	0.87707	-3.48719
0.91376	-6.74741	0.91154	-21.6768		0.91805	-10.7855	0.91853	-21.5285		0.91765	-10.6819	0.83155	-21.3234		0.32791	3.25365	0.32781	-1.79638		0.91804	1.43824	0.91805	-3.23008
0.95688	-6.83027	0.95577	-21.6764		0.95902	-10.8434	0.95927	-21.5287		0.95883	-10.747	0.87366	-21.3234		0.38582	3.32517	0.38575	-1.9374		0.95902	1.4135	0.95902	-3.46972
1	-6.85969	1	-21.6763		1	-10.8516	1	-21.5282		1	-10.7555	0.91577	-21.3232		0.44373	3.21668	0.4437	-1.77089		1	1.11522	1	-3.49832
0	--	0	--		0	--	0	--		0	--	0.95789	-21.3233		0.50164	3.23247	0.50164	-1.82772		0	--	0	--
0	-6.35706	0	-21.6759		0	-10.659	0	-21.5277		0	-10.5722	1	-21.3233		0.55955	2.88729	0.55959	-1.85376		0	1.11938	0	-3.49769
0.04312	-6.41852	0.04423	-21.6763		0.04098	-10.6728	0.04073	-21.5282		0.04117	-10.5867	0	--		0.61098	3.19402	0.61105	-1.816		0.04098	1.4858	0.04098	-3.42383
0.08624	-6.49852	0.08846	-21.6763		0.08195	-10.7113	0.08147	-21.528		0.08235	-10.6271	0	-21.3229		0.6624	3.31044	0.6625	-1.87674		0.08196	1.76597	0.08195	-3.20569
0.12936	-6.62768	0.13269	-21.6762		0.12293	-10.7668	0.1222	-21.5278		0.12352	-10.685	0.04211	-21.323		0.71382	3.1938	0.71396	-1.8753		0.12294	2.12294	0.12293	-3.24289
0.17972	-6.49732	0.18222	-21.6761		0.1639	-10.7636	0.16293	-21.5273		0.1647	-10.6638	0.08423	-21.3231		0.77496	3.12821	0.77501	-1.79682		0.16392	2.22369	0.1639	-3.21093
0.23009	-6.46479	0.23176	-21.6756		0.20488	-10.7401	0.20419	-21.5274		0.20544	-10.6573	0.12634	-21.3232		0.8361	3.02525	0.83607	-2.01521		0.2049	2.29976	0.20488	-3.44752
0.28045	-6.48377	0.28129	-21.675		0.24586	-10.6878	0.24546	-21.5274		0.24617	-10.6086	0.16845	-21.323		0.89074	3.28136	0.89071	-1.80781		0.24588	1.85071	0.24585	-3.25316
0.33082	-6.52776	0.33083	-21.675		0.28683	-10.6719	0.28672	-21.5275		0.28691	-10.5889	0.22124	-21.3228		0.94537	3.08723	0.94536	-1.8134		0.28686	1.57609	0.28683	-3.60661
0.3787	-6.51057	0.37852	-21.6749		0.32781	-10.6831	0.32798	-21.5276		0.32765	-10.5952	0.27403	-21.3222		1	2.88729	1	-1.85376		0.32784	1.64331	0.3278	-3.82431
0.42658	-6.48311	0.42621	-21.6753		0.37417	-10.6939	0.37437	-21.5276		0.37398	-10.6001	0.32682	-21.3213		0	--	0	--		0.37419	1.6618	0.37416	-3.59392
0.47447	-6.50218	0.47391	-21.6758		0.42053	-10.7282	0.42077	-21.5278		0.42032	-10.6293	0.37306	-21.3227		0	3.83551	0	-1.73359		0.42053	1.63749	0.42052	-3.25908
0.52235	-6.44424	0.5216	-21.6761		0.46688	-10.789	0.46716	-21.5279		0.46666	-10.6863	0.4193	-21.323		0.05463	3.40236	0.05464	-1.7908		0.46688	1.67417	0.46688	-3.31911
0.57023	-6.35706	0.56929	-21.6759		0.51324	-10.697	0.51355	-21.5276		0.51299	-10.6096	0.46554	-21.323		0.10926	3.29239	0.10929	-1.78362		0.51323	1.48136	0.51324	-3.44736
0.62338	-6.45215	0.62223	-21.6761		0.5596	-10.659	0.55994	-21.5277		0.55933	-10.5722	0.51178	-21.3229		0.1639	3.45076	0.16393	-1.917		0.55958	1.11938	0.5596	-3.49769
0.67654	-6.51075	0.67517	-21.6757		0.61106	-10.7057	0.61144	-21.5276		0.61076	-10.6182	0.55802	-21.3229		0.21857	3.19548	0.21856	-1.63912		0.61103	1.47626	0.61106	-3.44071
0.72969	-6.4935	0.72811	-21.6752		0.66252	-10.7733	0.66293	-21.528		0.6622	-10.6713	0.60935	-21.323		0.27324	3.38255	0.27318	-1.54404		0.66247	1.66161	0.66252	-3.34066
0.77667	-6.47709	0.77451	-21.6757		0.71398	-10.7141	0.71443	-21.5276		0.71363	-10.6168	0.66068	-21.323		0.32791	3.2576	0.32781	-1.79487		0.71392	1.6424	0.71398	-3.40673
0.82366	-6.56404	0.82091	-21.6761		0.75468	-10.7292	0.75531	-21.5275		0.75419	-10.6345	0.71201	-21.3231		0.38582	3.40955	0.38575	-1.81562		0.75464	1.78351	0.75469	-3.26937
0.87064	-6.62768	0.86731	-21.6762		0.79539	-10.7512	0.79619	-21.5274		0.79475	-10.6512	0.75185	-21.3231		0.44373	3.31762	0.4437	-1.76873		0.79536	2.139	0.79539	-3.44478
0.91376	-6.49852	0.91154	-21.6763		0.8361	-10.7636	0.83707	-21.5273		0.8353	-10.6638	0.7917	-21.3233		0.50164	3.51906	0.50164	-1.82649		0.83608	2.22369	0.8361	-3.21093
0.95688	-6.41852	0.95577	-21.6763		0.87707	-10.7668	0.8778	-21.5278		0.87648	-10.685	0.83155	-21.323		0.55955	3.83551	0.55959	-1.73359		0.87706	2.12294	0.87707	-3.24289
1	-6.35706	1	-21.6759		0.91805	-10.7113	0.91853	-21.528		0.91765	-10.6271	0.87366	-21.3232		0.61098	3.563	0.61105	-1.81178		0.91804	1.76597	0.91805	-3.20569
0	--	0	--		0.95902	-10.6728	0.95927	-21.5282		0.95883	-10.5867	0.91577	-21.3231		0.6624	3.31077	0.6625	-1.87464		0.95902	1.4858	0.95902	-3.42383
0	-6.35696	0	-21.6758		1	-10.659	1	-21.5277		1	-10.5722	0.95789	-21.323		0.71382	3.45037	0.71396	-1.68994		1	1.11938	1	-3.49769
0.04312	-6.39638	0.04423	-21.6758		0	--	0	--		0	--	1	-21.3229		0.77496	3.26442	0.77501	-1.6285		0	--	0	--
0.08624	-6.49845	0.08846	-21.6761		0	-10.6589	0	-21.5274		0	-10.5717	0	--		0.8361	3.45076	0.83607	-1.917		0	1.17687	0	-3.47597
0.12936	-6.62767	0.13269	-21.6762		0.04098	-10.6726	0.04073	-21.5274		0.04117	-10.5862	0	-21.3219		0.89074	3.29239	0.89071	-1.78362		0.04098	1.68661	0.04098	-3.38588
0.17972	-6.4973	0.18222	-21.6761		0.08195	-10.7111	0.08147	-21.5278		0.08235	-10.6266	0.04211	-21.3215		0.94537	3.40236	0.94536	-1.7908		0.08196	2.00157	0.08195	-3.12951
0.23009	-6.46477	0.23176	-21.6756		0.12293	-10.7565	0.1222	-21.5275		0.12352	-10.6547	0.08423	-21.3206		1	3.83551	1	-1.73359		0.12294	2.12582	0.12293	-3.06628
0.28045	-6.48376	0.28129	-21.675		0.1639	-10.7636	0.16293	-21.5273		0.1647	-10.6638	0.12634	-21.3216		0	--	0	--		0.16392	2.22571	0.1639	-3.2099
0.33082	-6.52775	0.33083	-21.675		0.20488	-10.74	0.20419	-21.5273		0.20544	-10.6573	0.16845	-21.323		0	3.83614	0	-1.46382		0.2049	2.30901	0.20488	-3.44628
0.3787	-6.45546	0.37852	-21.6748		0.24586	-10.6878	0.24546	-21.5274		0.24617	-10.6086	0.22124	-21.3228		0.05463	3.74709	0.05464	-1.76961		0.24588	1.85541	0.24585	-3.25251
0.42658	-6.4411	0.42621	-21.6753		0.28683	-10.6719	0.28672	-21.5274		0.28691	-10.5889	0.27403	-21.3221		0.10926	3.42938	0.10929	-1.77117		0.28686	1.59312	0.28683	-3.60521
0.47447	-6.44209	0.47391	-21.6755		0.32781	-10.6831	0.32798	-21.5275		0.32765	-10.5952	0.32682	-21.3213		0.1639	3.45076	0.16393	-1.917		0.32784	1.6743	0.3278	-3.82145
0.52235	-6.38516	0.5216	-21.6756		0.37417	-10.6583	0.37437	-21.5275		0.37398	-10.5716	0.37306	-21.3214		0.21857	3.20764	0.21856	-1.63895		0.37419	1.75158	0.37416	-3.57134
0.57023	-6.35696	0.56929	-21.6758		0.42053	-10.6492	0.42077	-21.5277		0.42032	-10.563	0.4193	-21.3215		0.27324	3.39606	0.27318	-1.54298		0.42053	1.6868	0.42052	-3.23834
0.62338	-6.39222	0.62223	-21.6756		0.46688	-10.6511	0.46716	-21.5275		0.46666	-10.5646	0.46554	-21.3214		0.32791	3.25761	0.32781	-1.79486		0.46688	1.95864	0.46688	-3.20946
0.67654	-6.45243	0.67517	-21.6755		0.51324	-10.6564	0.51355	-21.5274		0.51299	-10.5696	0.51178	-21.3216		0.38582	3.41004	0.38575	-1.43774		0.51323	1.65888	0.51324	-3.30283
0.72969	-6.41525	0.72811	-21.6751		0.5596	-10.6589	0.55994	-21.5274		0.55933	-10.5717	0.55802	-21.3219		0.44373	3.31789	0.4437	-1.54274		0.55958	1.17687	0.5596	-3.47597
0.77667	-6.46736	0.77451	-21.6757		0.61106	-10.6559	0.61144	-21.5274		0.61076	-10.5691	0.60935	-21.3215		0.50164	3.51989	0.50164	-1.81238		0.61103	1.67005	0.61106	-3.25958
0.82366	-6.46895	0.82091	-21.6761		0.66252	-10.6501	0.66293	-21.5275		0.6622	-10.5637	0.66068	-21.3214		0.55955	3.83614	0.55959	-1.46382		0.66247	2.12748	0.66252	-3.28477
0.87064	-6.62767	0.86731	-21.6762		0.71398	-10.6507	0.71443	-21.5276		0.71363	-10.5644	0.71201	-21.3215		0.61098	3.56385	0.61105	-1.79221		0.71392	1.7626	0.71398	-3.39115
0.91376	-6.49845	0.91154	-21.6761		0.75468	-10.6679	0.75531	-21.5275		0.75419	-10.5859	0.75185	-21.3214		0.6624	3.34055	0.6625	-1.5691		0.75464	2.05718	0.75469	-3.22948
0.95688	-6.39638	0.95577	-21.6758		0.79539	-10.7271	0.79619	-21.5273		0.79475	-10.648	0.7917	-21.3223		0.71382	3.45076	0.71396	-1.63472		0.79536	2.15743	0.79539	-3.29859
1	-6.35696	1	-21.6758		0.8361	-10.7636	0.83707	-21.5273		0.8353	-10.6638	0.83155	-21.323		0.77496	3.30151	0.77501	-1.55138		0.83608	2.22571	0.8361	-3.2099
0	--	0	--		0.87707	-10.7565	0.8778	-21.5275		0.87648	-10.6547	0.87366	-21.3216		0.8361	3.45076	0.83607	-1.917		0.87706	2.12582	0.87707	-3.06628
0	-6.31609	0	-21.6753		0.91805	-10.7111	0.91853	-21.5278		0.91765	-10.6266	0.91577	-21.3206		0.89074	3.42938	0.89071	-1.77117		0.91804	2.00157	0.91805	-3.12951
0.04312	-6.39628	0.04423	-21.675		0.95902	-10.6726	0.95927	-21.5274		0.95883	-10.5862	0.95789	-21.3215		0.94537	3.74709	0.94536	-1.76961		0.95902	1.68661	0.95902	-3.38588
0.08624	-6.4676	0.08846	-21.6741		1	-10.6589	1	-21.5274		1	-10.5717	1	-21.3219		1	3.83614	1	-1.46382		1	1.17687	1	-3.47597
0.12936	-6.46014	0.13269	-21.6733		0	--	0	--		0	--	0	--		0	--	0	--		0	--	0	--
0.17972	-6.46033	0.18222	-21.6734		0	-7.2787	0	-21.5267		0	-7.16011	0	-21.3213		0	3.83747	0	-1.40062		0	1.50918	0	-3.47553
0.23009	-6.31717	0.23176	-21.6739		0.04098	-7.35736	0.04073	-21.527		0.04117	-7.2398	0.04211	-21.3211		0.05463	3.78537	0.05464	-1.49922		0.04098	1.69136	0.04098	-3.38572
0.28045	-6.12873	0.28129	-21.6744		0.08195	-7.32568	0.08147	-21.5273		0.08235	-7.20949	0.08423	-21.3206		0.10926	3.54274	0.10929	-1.6986		0.08196	2.00264	0.08195	-3.12858
0.33082	-5.96975	0.33083	-21.6744		0.12293	-7.18863	0.1222	-21.5273		0.12352	-7.07462	0.12634	-21.3199		0.1639	3.46222	0.16393	-1.56991		0.12294	2.2572	0.12293	-3.06521
0.3787	-6.20285	0.37852	-21.6746		0.1639	-6.96975	0.16293	-21.5267		0.1647	-6.85949	0.16845	-21.3192		0.21857	3.58485	0.21856	-1.36523		0.16392	2.24168	0.1639	-3.20626
0.42658	-6.39782	0.42621	-21.6742		0.20488	-7.01914	0.20419	-21.5266		0.20544	-6.9	0.22124	-21.3195		0.27324	3.46446	0.27318	-1.25061		0.2049	2.4246	0.20488	-2.98808
0.47447	-6.35433	0.47391	-21.6746		0.24586	-7.03705	0.24546	-21.5265		0.24617	-6.92147	0.27403	-21.3203		0.32791	3.68211	0.32781	-1.03868		0.24588	1.97707	0.24585	-3.22633
0.52235	-6.32608	0.5216	-21.6753		0.28683	-7.02043	0.28672	-21.5263		0.28691	-6.9092	0.32682	-21.3212		0.38582	3.44752	0.38575	-1.30792		0.28686	1.74834	0.28683	-3.0257
0.57023	-6.31609	0.56929	-21.6753		0.32781	-6.99326	0.32798	-21.5259		0.32765	-6.88508	0.37306	-21.3209		0.44373	3.44035	0.4437	-1.54075		0.32784	1.81378	0.3278	-2.87685
0.62338	-6.32835	0.62223	-21.6752		0.37417	-7.05337	0.37437	-21.5269		0.37398	-6.94638	0.4193	-21.3202		0.50164	3.69988	0.50164	-1.43176		0.37419	1.76336	0.37416	-3.07754
0.67654	-6.36267	0.67517	-21.6744		0.42053	-7.18391	0.42077	-21.5275		0.42032	-7.07361	0.46554	-21.3208		0.55955	3.83747	0.55959	-1.40062		0.42053	2.07898	0.42052	-3.23672
0.72969	-6.36359	0.72811	-21.6743		0.46688	-7.29731	0.46716	-21.5274		0.46666	-7.18312	0.51178	-21.3214		0.61098	3.73586	0.61105	-1.3823		0.46688	1.97269	0.46688	-3.17957
0.77667	-6.42936	0.77451	-21.6739		0.51324	-7.33584	0.51355	-21.5269		0.51299	-7.21872	0.55802	-21.3213		0.6624	3.4129	0.6625	-1.56806		0.51323	1.70381	0.51324	-3.28029
0.82366	-6.46574	0.82091	-21.6735		0.5596	-7.2787	0.55994	-21.5267		0.55933	-7.16011	0.60935	-21.3214		0.71382	3.46605	0.71396	-1.42318		0.55958	1.50918	0.5596	-3.47553
0.87064	-6.46014	0.86731	-21.6733		0.61106	-7.33617	0.61144	-21.5269		0.61076	-7.21932	0.66068	-21.3206		0.77496	3.51483	0.77501	-1.48777		0.61103	1.71577	0.61106	-3.23703
0.91376	-6.4676	0.91154	-21.6741		0.66252	-7.27741	0.66293	-21.5275		0.6622	-7.16401	0.71201	-21.3205		0.8361	3.46222	0.83607	-1.56991		0.66247	2.16316	0.66252	-3.26236
0.95688	-6.39628	0.95577	-21.675		0.71398	-7.13873	0.71443	-21.5275		0.71363	-7.02974	0.75185	-21.3205		0.89074	3.54274	0.89071	-1.6986		0.71392	1.98656	0.71398	-3.38117
1	-6.31609	1	-21.6753		0.75468	-7.15014	0.75531	-21.5274		0.75419	-7.02402	0.7917	-21.3197		0.94537	3.78537	0.94536	-1.49922		0.75464	2.29517	0.75469	-3.20525
0	--	0	--		0.79539	-7.08145	0.79619	-21.5272		0.79475	-6.95777	0.83155	-21.3192		1	3.83747	1	-1.40062		0.79536	2.33945	0.79539	-3.26072
0	-6.31299	0	-21.6753		0.8361	-6.96975	0.83707	-21.5267		0.8353	-6.85949	0.87366	-21.3199		0	--	0	--		0.83608	2.24168	0.8361	-3.20626
0.04312	-6.34558	0.04423	-21.6747		0.87707	-7.18863	0.8778	-21.5273		0.87648	-7.07462	0.91577	-21.3206		0	3.84005	0	-1.39471		0.87706	2.2572	0.87707	-3.06521
0.08624	-6.40889	0.08846	-21.674		0.91805	-7.32568	0.91853	-21.5273		0.91765	-7.20949	0.95789	-21.3211		0.05463	3.79309	0.05464	-1.39035		0.91804	2.00264	0.91805	-3.12858
0.12936	-6.46012	0.13269	-21.6733		0.95902	-7.35736	0.95927	-21.527		0.95883	-7.2398	1	-21.3213		0.10926	3.64032	0.10929	-1.69019		0.95902	1.69136	0.95902	-3.38572
0.17972	-6.46032	0.18222	-21.6734		1	-7.2787	1	-21.5267		1	-7.16011	0	--		0.1639	3.46222	0.16393	-1.5699		1	1.50918	1	-3.47553
0.23009	-6.31715	0.23176	-21.6739		0	--	0	--		0	--	0	-21.3196		0.21857	3.59089	0.21856	-1.36226		0	--	0	--
0.28045	-6.12871	0.28129	-21.6744		0	-7.2787	0	-21.5253		0	-7.1598	0.04211	-21.3194		0.27324	3.46844	0.27318	-1.25006		0	1.96508	0	-2.85513
0.33082	-5.96974	0.33083	-21.6744		0.04098	-7.25701	0.04073	-21.5249		0.04117	-7.11588	0.08423	-21.3201		0.32791	3.68212	0.32781	-1.03867		0.04098	1.8872	0.04098	-2.8277
0.3787	-5.99625	0.37852	-21.6745		0.08195	-7.19282	0.08147	-21.5245		0.08235	-7.05537	0.12634	-21.3197		0.38582	3.5367	0.38575	-1.24559		0.08196	2.16453	0.08195	-2.88406
0.42658	-6.05742	0.42621	-21.6739		0.12293	-7.08904	0.1222	-21.5253		0.12352	-6.95829	0.16845	-21.3191		0.44373	3.68953	0.4437	-1.51136		0.12294	2.36587	0.12293	-2.94933
0.47447	-6.14102	0.47391	-21.6743		0.1639	-6.96974	0.16293	-21.5267		0.1647	-6.85948	0.22124	-21.3194		0.50164	3.88309	0.50164	-1.38561		0.16392	2.24613	0.1639	-3.20397
0.52235	-6.25047	0.5216	-21.6749		0.20488	-7.01914	0.20419	-21.5266		0.20544	-6.89998	0.27403	-21.3203		0.55955	3.84005	0.55959	-1.39471		0.2049	2.45151	0.20488	-2.98537
0.57023	-6.31299	0.56929	-21.6753		0.24586	-7.03703	0.24546	-21.5265		0.24617	-6.92146	0.32682	-21.3212		0.61098	3.89199	0.61105	-1.37409		0.24588	1.98222	0.24585	-3.22543
0.62338	-6.23824	0.62223	-21.6748		0.28683	-7.02039	0.28672	-21.5263		0.28691	-6.90919	0.37306	-21.3198		0.6624	3.74666	0.6625	-1.46991		0.28686	1.75983	0.28683	-3.02414
0.67654	-6.12032	0.67517	-21.6742		0.32781	-6.99326	0.32798	-21.5259		0.32765	-6.88507	0.4193	-21.3198		0.71382	3.50179	0.71396	-1.4209		0.32784	1.8187	0.3278	-2.87297
0.72969	-6.03422	0.72811	-21.6741		0.37417	-7.05337	0.37437	-21.5259		0.37398	-6.93709	0.46554	-21.3193		0.77496	3.56684	0.77501	-1.38457		0.37419	1.87868	0.37416	-3.04778
0.77667	-6.25308	0.77451	-21.6736		0.42053	-7.1839	0.42077	-21.5257		0.42032	-7.0563	0.51178	-21.3195		0.8361	3.46222	0.83607	-1.5699		0.42053	2.38813	0.42052	-3.22928
0.82366	-6.4465	0.82091	-21.6734		0.46688	-7.29731	0.46716	-21.5255		0.46666	-7.16027	0.55802	-21.3196		0.89074	3.64032	0.89071	-1.69019		0.46688	2.35071	0.46688	-3.08773
0.87064	-6.46012	0.86731	-21.6733		0.51324	-7.33583	0.51355	-21.5254		0.51299	-7.19374	0.60935	-21.3195		0.94537	3.79309	0.94536	-1.39035		0.51323	2.04135	0.51324	-2.91715
0.91376	-6.40889	0.91154	-21.674		0.5596	-7.2787	0.55994	-21.5253		0.55933	-7.1598	0.66068	-21.3195		1	3.84005	1	-1.39471		0.55958	1.96508	0.5596	-2.85513
0.95688	-6.34558	0.95577	-21.6747		0.61106	-7.33617	0.61144	-21.5254		0.61076	-7.19439	0.71201	-21.3195		0	--	0	--		0.61103	2.11389	0.61106	-2.93124
1	-6.31299	1	-21.6753		0.66252	-7.27741	0.66293	-21.5256		0.6622	-7.14211	0.75185	-21.3194		0	3.85084	0	-1.35057		0.66247	2.16637	0.66252	-3.13599
0	--	0	--		0.71398	-7.13872	0.71443	-21.5258		0.71363	-7.01486	0.7917	-21.3191		0.05463	3.87176	0.05464	-1.32014		0.71392	2.09731	0.71398	-3.20377
0	-6.31224	0	-21.6736		0.75468	-7.13104	0.75531	-21.5254		0.75419	-7.01975	0.83155	-21.3191		0.10926	3.65127	0.10929	-1.67024		0.75464	2.34295	0.75469	-3.14003
0.04312	-6.15728	0.04423	-21.6736		0.79539	-7.06939	0.79619	-21.526		0.79475	-6.95662	0.87366	-21.3197		0.1639	3.63265	0.16393	-1.24198		0.79536	2.36829	0.79539	-3.23542
0.08624	-5.96566	0.08846	-21.6735		0.8361	-6.96974	0.83707	-21.5267		0.8353	-6.85948	0.91577	-21.3201		0.21857	3.74739	0.21856	-1.3097		0.83608	2.24613	0.8361	-3.20397
0.12936	-5.75755	0.13269	-21.6732		0.87707	-7.08904	0.8778	-21.5253		0.87648	-6.95829	0.95789	-21.3194		0.27324	3.81356	0.27318	-1.22564		0.87706	2.36587	0.87707	-2.94933
0.17972	-5.76601	0.18222	-21.6732		0.91805	-7.19282	0.91853	-21.5245		0.91765	-7.05537	1	-21.3196		0.32791	3.6969	0.32781	-1.03847		0.91804	2.16453	0.91805	-2.88406
0.23009	-5.79596	0.23176	-21.6732		0.95902	-7.25701	0.95927	-21.5249		0.95883	-7.11588	0	--		0.38582	3.53718	0.38575	-1.24306		0.95902	1.8872	0.95902	-2.8277
0.28045	-5.8595	0.28129	-21.6737		1	-7.2787	1	-21.5253		1	-7.1598	0	-21.3169		0.44373	3.6903	0.4437	-1.43144		1	1.96508	1	-2.85513
0.33082	-5.96973	0.33083	-21.6743		0	--	0	--		0	--	0.04211	-21.3185		0.50164	3.88415	0.50164	-1.38469		0	--	0	--
0.3787	-5.98695	0.37852	-21.6739		0	-7.27862	0	-21.525		0	-7.1364	0.08423	-21.3189		0.55955	3.85084	0.55959	-1.35057		0	2.01783	0	-2.8545
0.42658	-6.04752	0.42621	-21.6738		0.04098	-7.25693	0.04073	-21.5249		0.04117	-7.11563	0.12634	-21.3184		0.61098	3.89307	0.61105	-1.37243		0.04098	2.07827	0.04098	-2.8139
0.47447	-6.1394	0.47391	-21.6739		0.08195	-7.19273	0.08147	-21.5244		0.08235	-7.05513	0.16845	-21.3187		0.6624	3.74748	0.6625	-1.42695		0.08196	2.50068	0.08195	-2.88312
0.52235	-6.2282	0.5216	-21.6737		0.12293	-7.08895	0.1222	-21.5244		0.12352	-6.95804	0.22124	-21.3186		0.71382	3.5024	0.71396	-1.17378		0.12294	2.36929	0.12293	-2.88596
0.57023	-6.31224	0.56929	-21.6736		0.1639	-6.95159	0.16293	-21.5242		0.1647	-6.83134	0.27403	-21.3184		0.77496	3.6654	0.77501	-1.36558		0.16392	2.77293	0.1639	-3.04887
0.62338	-6.21847	0.62223	-21.6737		0.20488	-6.96853	0.20419	-21.5245		0.20544	-6.85881	0.32682	-21.3181		0.8361	3.63265	0.83607	-1.24198		0.2049	2.45397	0.20488	-2.96389
0.67654	-6.11842	0.67517	-21.6739		0.24586	-6.9677	0.24546	-21.5246		0.24617	-6.85924	0.37306	-21.3189		0.89074	3.65127	0.89071	-1.67024		0.24588	2.58559	0.24585	-3.18901
0.72969	-6.02319	0.72811	-21.6737		0.28683	-6.97414	0.28672	-21.5253		0.28691	-6.86665	0.4193	-21.3188		0.94537	3.87176	0.94536	-1.32014		0.28686	2.37629	0.28683	-2.92733
0.77667	-5.92432	0.77451	-21.6735		0.32781	-6.99322	0.32798	-21.5258		0.32765	-6.88507	0.46554	-21.3192		1	3.85084	1	-1.35057		0.32784	1.94959	0.3278	-2.84732
0.82366	-5.83369	0.82091	-21.6734		0.37417	-6.98012	0.37437	-21.5254		0.37398	-6.87612	0.51178	-21.3182		0	--	0	--		0.37419	1.89796	0.37416	-2.93311
0.87064	-5.75755	0.86731	-21.6732		0.42053	-6.869	0.42077	-21.5246		0.42032	-6.77448	0.55802	-21.3169		0	4.31903	0	-1.34743		0.42053	2.67085	0.42052	-3.21041
0.91376	-5.96566	0.91154	-21.6735		0.46688	-6.91887	0.46716	-21.5247		0.46666	-6.8008	0.60935	-21.3183		0.05463	4.17176	0.05464	-1.27443		0.46688	2.35589	0.46688	-3.06467
0.95688	-6.15728	0.95577	-21.6736		0.51324	-7.13154	0.51355	-21.5249		0.51299	-7.01255	0.66068	-21.3191		0.10926	3.93744	0.10929	-1.30868		0.51323	2.08816	0.51324	-2.89391
1	-6.31224	1	-21.6736		0.5596	-7.27862	0.55994	-21.525		0.55933	-7.1364	0.71201	-21.319		0.1639	3.63265	0.16393	-1.24198		0.55958	2.01783	0.5596	-2.8545
0	--	0	--		0.61106	-7.11076	0.61144	-21.5249		0.61076	-6.99182	0.75185	-21.3189		0.21857	3.75648	0.21856	-1.30764		0.61103	2.16045	0.61106	-2.90801
0	-5.36234	0	-21.6736		0.66252	-6.86708	0.66293	-21.5247		0.6622	-6.74934	0.7917	-21.319		0.27324	3.82698	0.27318	-1.22421		0.66247	2.29703	0.66252	-3.11299
0.04312	-5.4167	0.04423	-21.6734		0.71398	-6.91503	0.71443	-21.5249		0.71363	-6.81678	0.83155	-21.3187		0.32791	3.69692	0.32781	-1.03846		0.71392	2.51053	0.71398	-3.17392
0.08624	-5.56165	0.08846	-21.6732		0.75468	-6.91182	0.75531	-21.5247		0.75419	-6.8077	0.87366	-21.3184		0.38582	3.99667	0.38575	-1.11873		0.75464	2.62257	0.75469	-3.11151
0.12936	-5.75753	0.13269	-21.6732		0.79539	-6.94219	0.79619	-21.5245		0.79475	-6.82913	0.91577	-21.3189		0.44373	4.19922	0.4437	-1.43019		0.79536	2.46081	0.79539	-2.85847
0.17972	-5.76599	0.18222	-21.6732		0.8361	-6.95159	0.83707	-21.5242		0.8353	-6.83134	0.95789	-21.3185		0.50164	4.20677	0.50164	-1.3814		0.83608	2.77293	0.8361	-3.04887
0.23009	-5.79593	0.23176	-21.6732		0.87707	-7.08895	0.8778	-21.5244		0.87648	-6.95804	1	-21.3169		0.55955	4.31903	0.55959	-1.34743		0.87706	2.36929	0.87707	-2.88596
0.28045	-5.85948	0.28129	-21.6737		0.91805	-7.19273	0.91853	-21.5244		0.91765	-7.05513	0	--		0.61098	4.21186	0.61105	-1.37139		0.91804	2.50068	0.91805	-2.88312
0.33082	-5.96972	0.33083	-21.6743		0.95902	-7.25693	0.95927	-21.5249		0.95883	-7.11563	0	-21.3168		0.6624	4.2314	0.6625	-1.42378		0.95902	2.07827	0.95902	-2.8139
0.3787	-5.7623	0.37852	-21.6737		1	-7.27862	1	-21.525		1	-7.1364	0.04211	-21.317		0.71382	4.0758	0.71396	-1.17333		1	2.01783	1	-2.8545
0.42658	-5.59231	0.42621	-21.6737		0	--	0	--		0	--	0.08423	-21.3177		0.77496	3.9266	0.77501	-1.31451		0	--	0	--
0.47447	-5.46632	0.47391	-21.6735		0	-7.27861	0	-21.5248		0	-7.13614	0.12634	-21.3182		0.8361	3.63265	0.83607	-1.24198		0	2.01814	0	-2.83183
0.52235	-5.38863	0.5216	-21.6735		0.04098	-7.10147	0.04073	-21.5244		0.04117	-6.98156	0.16845	-21.3187		0.89074	3.93744	0.89071	-1.30868		0.04098	2.07889	0.04098	-2.80443
0.57023	-5.36234	0.56929	-21.6736		0.08195	-6.84782	0.08147	-21.5242		0.08235	-6.72664	0.22124	-21.3186		0.94537	4.17176	0.94536	-1.27443		0.08196	2.50533	0.08195	-2.7467
0.62338	-5.39471	0.62223	-21.6735		0.12293	-6.79144	0.1222	-21.5241		0.12352	-6.68646	0.27403	-21.3183		1	4.31903	1	-1.34743		0.12294	2.52984	0.12293	-2.80445
0.67654	-5.49003	0.67517	-21.6735		0.1639	-6.95159	0.16293	-21.5242		0.1647	-6.83133	0.32682	-21.318		0	--	0	--		0.16392	2.79276	0.1639	-3.0475
0.72969	-5.64379	0.72811	-21.6735		0.20488	-6.96852	0.20419	-21.5244		0.20544	-6.85879	0.37306	-21.3184		0	4.34402	0	-1.16526		0.2049	2.45912	0.20488	-2.95641
0.77667	-5.65431	0.77451	-21.6735		0.24586	-6.96766	0.24546	-21.5246		0.24617	-6.85923	0.4193	-21.3186		0.05463	4.30337	0.05464	-1.27328		0.24588	2.6181	0.24585	-3.18498
0.82366	-5.69587	0.82091	-21.6733		0.28683	-6.97409	0.28672	-21.5252		0.28691	-6.86664	0.46554	-21.3176		0.10926	4.30433	0.10929	-1.2802		0.28686	2.38361	0.28683	-2.92412
0.87064	-5.75753	0.86731	-21.6732		0.32781	-6.99321	0.32798	-21.5258		0.32765	-6.88504	0.51178	-21.3169		0.1639	4.3607	0.16393	-1.22389		0.32784	1.95104	0.3278	-2.84689
0.91376	-5.56165	0.91154	-21.6732		0.37417	-6.90114	0.37437	-21.525		0.37398	-6.79338	0.55802	-21.3168		0.21857	4.39395	0.21856	-1.21423		0.37419	2.65512	0.37416	-2.91186
0.95688	-5.4167	0.95577	-21.6734		0.42053	-6.71903	0.42077	-21.5246		0.42032	-6.61541	0.60935	-21.317		0.27324	4.50634	0.27318	-1.07727		0.42053	2.74601	0.42052	-3.20124
1	-5.36234	1	-21.6736		0.46688	-6.91886	0.46716	-21.5242		0.46666	-6.78618	0.66068	-21.3178		0.32791	4.66951	0.32781	-0.97788		0.46688	2.48281	0.46688	-2.78897
0	--	0	--		0.51324	-7.13154	0.51355	-21.5241		0.51299	-6.99273	0.71201	-21.3187		0.38582	4.43715	0.38575	-1.11839		0.51323	2.2184	0.51324	-2.71117
0	-3.9934	0	-21.6733		0.5596	-7.27861	0.55994	-21.5248		0.55933	-7.13614	0.75185	-21.3182		0.44373	4.268	0.4437	-1.29583		0.55958	2.01814	0.5596	-2.83183
0.04312	-3.87628	0.04423	-21.6733		0.61106	-7.11075	0.61144	-21.5241		0.61076	-6.97252	0.7917	-21.3182		0.50164	4.30979	0.50164	-1.36397		0.61103	2.24638	0.61106	-2.68029
0.08624	-3.55347	0.08846	-21.673		0.66252	-6.86707	0.66293	-21.5243		0.6622	-6.73594	0.83155	-21.3187		0.55955	4.34402	0.55959	-1.16526		0.66247	2.54115	0.66252	-2.79869
0.12936	-3.08244	0.13269	-21.6731		0.71398	-6.7872	0.71443	-21.5246		0.71363	-6.68187	0.87366	-21.3182		0.61098	4.31716	0.61105	-1.36982		0.71392	2.70015	0.71398	-3.03748
0.17972	-3.0579	0.18222	-21.6731		0.75468	-6.78805	0.75531	-21.5246		0.75419	-6.67852	0.91577	-21.3177		0.6624	4.24187	0.6625	-1.33446		0.75464	2.66017	0.75469	-3.06799
0.23009	-3.15369	0.23176	-21.673		0.79539	-6.90374	0.79619	-21.5243		0.79475	-6.77973	0.95789	-21.317		0.71382	4.37195	0.71396	-1.16072		0.79536	2.60471	0.79539	-2.83112
0.28045	-3.1328	0.28129	-21.6728		0.8361	-6.95159	0.83707	-21.5242		0.8353	-6.83133	1	-21.3168		0.77496	4.34783	0.77501	-1.28747		0.83608	2.79276	0.8361	-3.0475
0.33082	-2.96907	0.33083	-21.6726		0.87707	-6.79144	0.8778	-21.5241		0.87648	-6.68646	0	--		0.8361	4.3607	0.83607	-1.22389		0.87706	2.52984	0.87707	-2.80445
0.3787	-3.17854	0.37852	-21.6731		0.91805	-6.84782	0.91853	-21.5242		0.91765	-6.72664	0	-21.3166		0.89074	4.30433	0.89071	-1.2802		0.91804	2.50533	0.91805	-2.7467
0.42658	-3.48971	0.42621	-21.6736		0.95902	-7.10147	0.95927	-21.5244		0.95883	-6.98156	0.04211	-21.3162		0.94537	4.30337	0.94536	-1.27328		0.95902	2.07889	0.95902	-2.80443
0.47447	-3.76152	0.47391	-21.6733		1	-7.27861	1	-21.5248		1	-7.13614	0.08423	-21.3167		1	4.34402	1	-1.16526		1	2.01814	1	-2.83183
0.52235	-3.93411	0.5216	-21.6733		0	--	0	--		0	--	0.12634	-21.3177		0	--	0	--		0	--	0	--
0.57023	-3.9934	0.56929	-21.6733		0	-6.44579	0	-21.5238		0	-6.39103	0.16845	-21.3175		0	4.37375	0	-1.16135		0	2.07084	0	-2.83119
0.62338	-3.92048	0.62223	-21.6733		0.04098	-6.4979	0.04073	-21.5242		0.04117	-6.4335	0.22124	-21.3176		0.05463	4.43748	0.05464	-1.25037		0.04098	2.29679	0.04098	-2.78827
0.67654	-3.7096	0.67517	-21.6735		0.08195	-6.62864	0.08147	-21.524		0.08235	-6.54368	0.27403	-21.3177		0.10926	4.41969	0.10929	-1.242		0.08196	2.54823	0.08195	-2.72356
0.72969	-3.38189	0.72811	-21.6735		0.12293	-6.79136	0.1222	-21.524		0.12352	-6.68621	0.32682	-21.318		0.1639	4.36074	0.16393	-1.22389		0.12294	2.54748	0.12293	-2.73528
0.77667	-3.33295	0.77451	-21.6733		0.1639	-6.9515	0.16293	-21.5238		0.1647	-6.83109	0.37306	-21.3175		0.21857	4.39498	0.21856	-1.21272		0.16392	2.89717	0.1639	-2.63063
0.82366	-3.23314	0.82091	-21.673		0.20488	-6.83602	0.20419	-21.5237		0.20544	-6.7169	0.4193	-21.317		0.27324	4.50806	0.27318	-1.0772		0.2049	2.66339	0.20488	-2.8442
0.87064	-3.08244	0.86731	-21.6731		0.24586	-6.68987	0.24546	-21.5245		0.24617	-6.57312	0.46554	-21.3164		0.32791	4.66953	0.32781	-0.97785		0.24588	2.94798	0.24585	-2.71164
0.91376	-3.55347	0.91154	-21.673		0.28683	-6.53923	0.28672	-21.5246		0.28691	-6.42427	0.51178	-21.3162		0.38582	4.65651	0.38575	-1.09887		0.28686	2.89853	0.28683	-2.73639
0.95688	-3.87628	0.95577	-21.6733		0.32781	-6.4095	0.32798	-21.5244		0.32765	-6.29443	0.55802	-21.3166		0.44373	4.60074	0.4437	-1.29478		0.32784	2.98311	0.3278	-2.84137
1	-3.9934	1	-21.6733		0.37417	-6.55255	0.37437	-21.5246		0.37398	-6.4429	0.60935	-21.3162		0.50164	4.49391	0.50164	-1.17847		0.37419	2.93279	0.37416	-2.89231
0	--	0	--		0.42053	-6.68285	0.42077	-21.5245		0.42032	-6.56653	0.66068	-21.3165		0.55955	4.37375	0.55959	-1.16135		0.42053	2.80194	0.42052	-3.17337
0	-2.83595	0	-21.6733		0.46688	-6.69357	0.46716	-21.5242		0.46666	-6.61373	0.71201	-21.3172		0.61098	4.48237	0.61105	-1.20798		0.46688	2.54539	0.46688	-2.76636
0.04312	-2.8737	0.04423	-21.6731		0.51324	-6.52103	0.51355	-21.5241		0.51299	-6.45785	0.75185	-21.3177		0.6624	4.57974	0.6625	-1.33178		0.51323	2.27524	0.51324	-2.68542
0.08624	-2.88002	0.08846	-21.6729		0.5596	-6.44579	0.55994	-21.5238		0.55933	-6.39103	0.7917	-21.3178		0.71382	4.64414	0.71396	-1.15207		0.55958	2.07084	0.5596	-2.83119
0.12936	-3.08242	0.13269	-21.6731		0.61106	-6.537	0.61144	-21.524		0.61076	-6.47215	0.83155	-21.3175		0.77496	4.44045	0.77501	-1.17461		0.61103	2.30368	0.61106	-2.65423
0.17972	-3.05788	0.18222	-21.673		0.66252	-6.73485	0.66293	-21.5242		0.6622	-6.6514	0.87366	-21.3177		0.8361	4.36074	0.83607	-1.22389		0.66247	2.60581	0.66252	-2.76973
0.23009	-3.15368	0.23176	-21.673		0.71398	-6.61011	0.71443	-21.5245		0.71363	-6.49729	0.91577	-21.3167		0.89074	4.41969	0.89071	-1.242		0.71392	2.82025	0.71398	-3.01372
0.28045	-3.1328	0.28129	-21.6728		0.75468	-6.78361	0.75531	-21.5245		0.75419	-6.66351	0.95789	-21.3162		0.94537	4.43748	0.94536	-1.25037		0.75464	2.73584	0.75469	-3.06348
0.33082	-2.96907	0.33083	-21.6726		0.79539	-6.86026	0.79619	-21.5237		0.79475	-6.75262	1	-21.3166		1	4.37375	1	-1.16135		0.79536	2.83419	0.79539	-2.78373
0.3787	-3.14574	0.37852	-21.673		0.8361	-6.9515	0.83707	-21.5238		0.8353	-6.83109	0	--		0	--	0	--		0.83608	2.89717	0.8361	-2.63063
0.42658	-3.25799	0.42621	-21.6732		0.87707	-6.79136	0.8778	-21.524		0.87648	-6.68621	0	-21.3163		0	4.44007	0	-1.16027		0.87706	2.54748	0.87707	-2.73528
0.47447	-3.20932	0.47391	-21.6732		0.91805	-6.62864	0.91853	-21.524		0.91765	-6.54368	0.04211	-21.3157		0.05463	4.51877	0.05464	-1.24163		0.91804	2.54823	0.91805	-2.72356
0.52235	-3.05305	0.5216	-21.6732		0.95902	-6.4979	0.95927	-21.5242		0.95883	-6.4335	0.08423	-21.3163		0.10926	4.73032	0.10929	-1.21065		0.95902	2.29679	0.95902	-2.78827
0.57023	-2.83595	0.56929	-21.6733		1	-6.44579	1	-21.5238		1	-6.39103	0.12634	-21.3168		0.1639	5.07698	0.16393	-0.99239		1	2.07084	1	-2.83119
0.62338	-3.0744	0.62223	-21.6732		0	--	0	--		0	--	0.16845	-21.3174		0.21857	5.0155	0.21856	-1.09248		0	--	0	--
0.67654	-3.23028	0.67517	-21.6732		0	-6.44572	0	-21.5238		0	-6.3908	0.22124	-21.3175		0.27324	4.84425	0.27318	-1.00252		0	2.66949	0	-1.97871
0.72969	-3.24642	0.72811	-21.6733		0.04098	-6.49782	0.04073	-21.524		0.04117	-6.43327	0.27403	-21.3177		0.32791	4.67166	0.32781	-0.97602		0.04098	2.61852	0.04098	-2.27416
0.77667	-3.19277	0.77451	-21.673		0.08195	-6.62856	0.08147	-21.5237		0.08235	-6.54344	0.32682	-21.3179		0.38582	4.65743	0.38575	-0.98517		0.08196	2.55337	0.08195	-2.70322
0.82366	-3.04644	0.82091	-21.673		0.12293	-6.70718	0.1222	-21.5239		0.12352	-6.60278	0.37306	-21.3172		0.44373	4.60095	0.4437	-1.26311		0.12294	2.60403	0.12293	-2.73507
0.87064	-3.08242	0.86731	-21.6731		0.1639	-6.9515	0.16293	-21.5238		0.1647	-6.83107	0.4193	-21.3166		0.50164	4.49531	0.50164	-1.14224		0.16392	2.90293	0.1639	-2.62065
0.91376	-2.88002	0.91154	-21.6729		0.20488	-6.83597	0.20419	-21.5237		0.20544	-6.71687	0.46554	-21.3163		0.55955	4.44007	0.55959	-1.16027		0.2049	2.67528	0.20488	-2.84167
0.95688	-2.8737	0.95577	-21.6731		0.24586	-6.68981	0.24546	-21.5245		0.24617	-6.57309	0.51178	-21.3158		0.61098	4.48391	0.61105	-1.13482		0.24588	2.95132	0.24585	-2.70785
1	-2.83595	1	-21.6733		0.28683	-6.53916	0.28672	-21.5245		0.28691	-6.42423	0.55802	-21.3163		0.6624	4.57991	0.6625	-1.29145		0.28686	2.93072	0.28683	-2.73416
0	--	0	--		0.32781	-6.40949	0.32798	-21.5244		0.32765	-6.29441	0.60935	-21.3158		0.71382	4.64503	0.71396	-1.04948		0.32784	3.04967	0.3278	-2.84091
0	-2.83592	0	-21.6727		0.37417	-6.48754	0.37437	-21.5244		0.37398	-6.37286	0.66068	-21.3163		0.77496	4.89231	0.77501	-1.11059		0.37419	2.96728	0.37416	-2.69895
0.04312	-2.87367	0.04423	-21.6727		0.42053	-6.68284	0.42077	-21.5243		0.42032	-6.55738	0.71201	-21.3168		0.8361	5.07698	0.83607	-0.99239		0.42053	2.85299	0.42052	-3.10334
0.08624	-2.87998	0.08846	-21.6727		0.46688	-6.58055	0.46716	-21.5239		0.46666	-6.49546	0.75185	-21.3169		0.89074	4.73032	0.89071	-1.21065		0.46688	2.62642	0.46688	-2.65769
0.12936	-2.82709	0.13269	-21.6729		0.51324	-6.49641	0.51355	-21.5239		0.51299	-6.43057	0.7917	-21.3172		0.94537	4.51877	0.94536	-1.24163		0.51323	2.58051	0.51324	-2.45234
0.17972	-3.03988	0.18222	-21.6729		0.5596	-6.44572	0.55994	-21.5238		0.55933	-6.3908	0.83155	-21.3174		1	4.44007	1	-1.16027		0.55958	2.66949	0.5596	-1.97871
0.23009	-2.9867	0.23176	-21.6728		0.61106	-6.50606	0.61144	-21.5239		0.61076	-6.43813	0.87366	-21.3168		0	--	0	--		0.61103	2.56109	0.61106	-2.5338
0.28045	-2.88761	0.28129	-21.6725		0.66252	-6.59367	0.66293	-21.524		0.6622	-6.50475	0.91577	-21.3163		0	4.44033	0	-1.15993		0.66247	2.63365	0.66252	-2.76835
0.33082	-2.96907	0.33083	-21.6726		0.71398	-6.6101	0.71443	-21.5245		0.71363	-6.49443	0.95789	-21.3157		0.05463	4.55543	0.05464	-1.17906		0.71392	2.88204	0.71398	-2.95481
0.3787	-3.0358	0.37852	-21.6728		0.75468	-6.66148	0.75531	-21.5241		0.75419	-6.55413	1	-21.3163		0.10926	4.84252	0.10929	-1.13432		0.75464	2.78255	0.75469	-3.04054
0.42658	-3.01483	0.42621	-21.673		0.79539	-6.79527	0.79619	-21.5237		0.79475	-6.68149	0	--		0.1639	5.07698	0.16393	-0.99238		0.79536	2.83775	0.79539	-2.75821
0.47447	-2.89507	0.47391	-21.673		0.8361	-6.9515	0.83707	-21.5238		0.8353	-6.83107	0	-21.3146		0.21857	5.01826	0.21856	-1.09165		0.83608	2.90293	0.8361	-2.62065
0.52235	-2.77556	0.5216	-21.6729		0.87707	-6.70718	0.8778	-21.5239		0.87648	-6.60278	0.04211	-21.3152		0.27324	4.84652	0.27318	-1.0023		0.87706	2.60403	0.87707	-2.73507
0.57023	-2.83592	0.56929	-21.6727		0.91805	-6.62856	0.91853	-21.5237		0.91765	-6.54344	0.08423	-21.3136		0.32791	4.67167	0.32781	-0.97599		0.91804	2.55337	0.91805	-2.70322
0.62338	-2.78632	0.62223	-21.6729		0.95902	-6.49782	0.95927	-21.524		0.95883	-6.43327	0.12634	-21.3122		0.38582	4.944	0.38575	-0.98074		0.95902	2.61852	0.95902	-2.27416
0.67654	-2.9292	0.67517	-21.673		1	-6.44572	1	-21.5238		1	-6.3908	0.16845	-21.3109		0.44373	4.82403	0.4437	-1.07266		1	2.66949	1	-1.97871
0.72969	-3.03313	0.72811	-21.673		0	--	0	--		0	--	0.22124	-21.3109		0.50164	4.55134	0.50164	-1.0345		0	--	0	--
0.77667	-3.06627	0.77451	-21.6728		0	-6.18383	0	-21.5237		0	-6.09806	0.27403	-21.3108		0.55955	4.44033	0.55959	-1.15993		0	2.67335	0	-1.97124
0.82366	-2.98892	0.82091	-21.6728		0.04098	-6.25678	0.04073	-21.5235		0.04117	-6.16767	0.32682	-21.3106		0.61098	4.53005	0.61105	-0.99459		0.04098	2.62219	0.04098	-2.27001
0.87064	-2.82709	0.86731	-21.6729		0.08195	-6.45008	0.08147	-21.5236		0.08235	-6.35342	0.37306	-21.3116		0.6624	4.75129	0.6625	-1.09327		0.08196	2.61515	0.08195	-2.67301
0.91376	-2.87998	0.91154	-21.6727		0.12293	-6.54449	0.1222	-21.5234		0.12352	-6.42217	0.4193	-21.3127		0.71382	5.02208	0.71396	-1.04906		0.12294	2.94199	0.12293	-2.65302
0.95688	-2.87367	0.95577	-21.6727		0.1639	-6.22198	0.16293	-21.5233		0.1647	-6.09891	0.46554	-21.314		0.77496	4.96718	0.77501	-1.10927		0.16392	2.91643	0.1639	-2.59149
1	-2.83592	1	-21.6727		0.20488	-6.23029	0.20419	-21.5234		0.20544	-6.10807	0.51178	-21.3151		0.8361	5.07698	0.83607	-0.99238		0.2049	3.14866	0.20488	-2.81509
0	--	0	--		0.24586	-6.25864	0.24546	-21.5237		0.24617	-6.13873	0.55802	-21.3146		0.89074	4.84252	0.89071	-1.13432		0.24588	3.18831	0.24585	-2.65285
0	-2.62476	0	-21.6724		0.28683	-6.31568	0.28672	-21.524		0.28691	-6.19859	0.60935	-21.315		0.94537	4.55543	0.94536	-1.17906		0.28686	3.13947	0.28683	-2.61763
0.04312	-2.59617	0.04423	-21.6725		0.32781	-6.40942	0.32798	-21.5243		0.32765	-6.2944	0.66068	-21.3137		1	4.44033	1	-1.15993		0.32784	3.08305	0.3278	-2.81455
0.08624	-2.72736	0.08846	-21.6727		0.37417	-6.48753	0.37437	-21.5244		0.37398	-6.36864	0.71201	-21.3123		0	--	0	--		0.37419	3.00687	0.37416	-2.67536
0.12936	-2.82708	0.13269	-21.6729		0.42053	-6.61012	0.42077	-21.5243		0.42032	-6.50998	0.75185	-21.3119		0	4.44203	0	-0.8563		0.42053	2.91696	0.42052	-3.07973
0.17972	-3.03987	0.18222	-21.6729		0.46688	-6.48612	0.46716	-21.5237		0.46666	-6.38931	0.7917	-21.3115		0.05463	4.55776	0.05464	-1.08967		0.46688	2.85005	0.46688	-2.62861
0.23009	-2.98668	0.23176	-21.6728		0.51324	-6.27398	0.51355	-21.5238		0.51299	-6.1846	0.83155	-21.3109		0.10926	4.84593	0.10929	-1.1294		0.51323	2.63932	0.51324	-2.42047
0.28045	-2.88759	0.28129	-21.6725		0.5596	-6.18383	0.55994	-21.5237		0.55933	-6.09806	0.87366	-21.3122		0.1639	5.1005	0.16393	-0.94109		0.55958	2.67335	0.5596	-1.97124
0.33082	-2.96906	0.33083	-21.6726		0.61106	-6.29324	0.61144	-21.5238		0.61076	-6.20313	0.91577	-21.3136		0.21857	5.11774	0.21856	-1.01495		0.61103	2.63481	0.61106	-2.50196
0.3787	-2.76992	0.37852	-21.6725		0.66252	-6.53868	0.66293	-21.5237		0.6622	-6.44021	0.95789	-21.3152		0.27324	5.19673	0.27318	-0.94273		0.66247	3.02549	0.66252	-2.73973
0.42658	-2.83693	0.42621	-21.6728		0.71398	-6.60112	0.71443	-21.5243		0.71363	-6.48699	1	-21.3146		0.32791	5.35552	0.32781	-0.88087		0.71392	3.22649	0.71398	-2.92528
0.47447	-2.84019	0.47391	-21.6726		0.75468	-6.50327	0.75531	-21.5241		0.75419	-6.38363	0	--		0.38582	5.09468	0.38575	-0.9773		0.75464	2.97643	0.75469	-2.8762
0.52235	-2.69413	0.5216	-21.6723		0.79539	-6.36778	0.79619	-21.5236		0.79475	-6.24569	0	-21.3145		0.44373	4.82606	0.4437	-0.92584		0.79536	2.86149	0.79539	-2.73461
0.57023	-2.62476	0.56929	-21.6724		0.8361	-6.22198	0.83707	-21.5233		0.8353	-6.09891	0.04211	-21.3133		0.50164	4.55357	0.50164	-1.03299		0.83608	2.91643	0.8361	-2.59149
0.62338	-2.71932	0.62223	-21.6723		0.87707	-6.54449	0.8778	-21.5234		0.87648	-6.42217	0.08423	-21.3118		0.55955	4.44203	0.55959	-0.8563		0.87706	2.94199	0.87707	-2.65302
0.67654	-2.84507	0.67517	-21.6727		0.91805	-6.45008	0.91853	-21.5236		0.91765	-6.35342	0.12634	-21.311		0.61098	4.53231	0.61105	-0.99431		0.91804	2.61515	0.91805	-2.67301
0.72969	-2.82177	0.72811	-21.6727		0.95902	-6.25678	0.95927	-21.5235		0.95883	-6.16767	0.16845	-21.3109		0.6624	4.75331	0.6625	-0.97538		0.95902	2.62219	0.95902	-2.27001
0.77667	-2.63973	0.77451	-21.6726		1	-6.18383	1	-21.5237		1	-6.09806	0.22124	-21.3109		0.71382	5.0332	0.71396	-1.00996		1	2.67335	1	-1.97124
0.82366	-2.88281	0.82091	-21.6728		0	--	0	--		0	--	0.27403	-21.3108		0.77496	5.01673	0.77501	-1.06023		0	--	0	--
0.87064	-2.82708	0.86731	-21.6729		0	-5.44914	0	-21.5237		0	-5.32654	0.32682	-21.3106		0.8361	5.1005	0.83607	-0.94109		0	2.95008	0	-1.95005
0.91376	-2.72736	0.91154	-21.6727		0.04098	-5.50416	0.04073	-21.5234		0.04117	-5.38142	0.37306	-21.3113		0.89074	4.84593	0.89071	-1.1294		0.04098	3.03966	0.04098	-2.20297
0.95688	-2.59617	0.95577	-21.6725		0.08195	-5.66549	0.08147	-21.5236		0.08235	-5.54243	0.4193	-21.3118		0.94537	4.55776	0.94536	-1.08967		0.08196	3.10081	0.08195	-2.51898
1	-2.62476	1	-21.6724		0.12293	-5.91592	0.1222	-21.5234		0.12352	-5.79264	0.46554	-21.3123		1	4.44203	1	-0.8563		0.12294	3.20261	0.12293	-2.65202
0	--	0	--		0.1639	-6.22198	0.16293	-21.5233		0.1647	-6.0989	0.51178	-21.3135		0	--	0	--		0.16392	2.9181	0.1639	-2.57886
0	-2.62469	0	-21.6718		0.20488	-6.23026	0.20419	-21.5234		0.20544	-6.10807	0.55802	-21.3145		0	4.44272	0	-0.8532		0.2049	3.15337	0.20488	-2.81473
0.04312	-2.59613	0.04423	-21.672		0.24586	-6.2586	0.24546	-21.5236		0.24617	-6.13871	0.60935	-21.3134		0.05463	4.61429	0.05464	-0.95014		0.24588	3.22687	0.24585	-2.6502
0.08624	-2.72731	0.08846	-21.6725		0.28683	-6.31561	0.28672	-21.524		0.28691	-6.19857	0.66068	-21.3121		0.10926	4.91945	0.10929	-0.99667		0.28686	3.16957	0.28683	-2.61694
0.12936	-2.82704	0.13269	-21.6726		0.32781	-6.40942	0.32798	-21.5243		0.32765	-6.29437	0.71201	-21.3117		0.1639	5.10051	0.16393	-0.94109		0.32784	3.08614	0.3278	-2.812
0.17972	-2.55918	0.18222	-21.6727		0.37417	-6.1984	0.37437	-21.5237		0.37398	-6.08049	0.75185	-21.3111		0.21857	5.11792	0.21856	-1.01429		0.37419	3.25996	0.37416	-2.61723
0.23009	-2.30032	0.23176	-21.6726		0.42053	-5.94817	0.42077	-21.5229		0.42032	-5.82876	0.7917	-21.3106		0.27324	5.19864	0.27318	-0.94231		0.42053	2.94981	0.42052	-2.38834
0.28045	-2.55014	0.28129	-21.6725		0.46688	-5.70216	0.46716	-21.5234		0.46666	-5.58153	0.83155	-21.3109		0.32791	5.35552	0.32781	-0.88085		0.46688	2.90177	0.46688	-2.62711
0.33082	-2.64081	0.33083	-21.6723		0.51324	-5.51788	0.51355	-21.5237		0.51299	-5.39594	0.87366	-21.311		0.38582	5.2133	0.38575	-0.97583		0.51323	3.06391	0.51324	-2.03935
0.3787	-2.68713	0.37852	-21.6724		0.5596	-5.44914	0.55994	-21.5237		0.55933	-5.32654	0.91577	-21.3118		0.44373	4.898	0.4437	-0.91412		0.55958	2.95008	0.5596	-1.95005
0.42658	-2.41083	0.42621	-21.6722		0.61106	-5.53328	0.61144	-21.5238		0.61076	-5.41148	0.95789	-21.3133		0.50164	4.61859	0.50164	-0.97965		0.61103	3.08909	0.61106	-2.10028
0.47447	-2.48256	0.47391	-21.6721		0.66252	-5.75313	0.66293	-21.5236		0.6622	-5.63278	1	-21.3145		0.55955	4.44272	0.55959	-0.8532		0.66247	3.06794	0.66252	-2.64582
0.52235	-2.626	0.5216	-21.672		0.71398	-6.03273	0.71443	-21.5231		0.71363	-5.91375	0	--		0.61098	4.57917	0.61105	-0.98088		0.71392	3.27038	0.71398	-2.48878
0.57023	-2.62469	0.56929	-21.6718		0.75468	-6.01702	0.75531	-21.5231		0.75419	-5.8962	0	-21.3119		0.6624	4.85826	0.6625	-0.92343		0.75464	3.23525	0.75469	-2.83892
0.62338	-2.60397	0.62223	-21.6721		0.79539	-6.09286	0.79619	-21.5235		0.79475	-5.97032	0.04211	-21.312		0.71382	5.07212	0.71396	-0.86788		0.79536	3.11082	0.79539	-2.71849
0.67654	-2.46985	0.67517	-21.6721		0.8361	-6.22198	0.83707	-21.5233		0.8353	-6.0989	0.08423	-21.3117		0.77496	5.10022	0.77501	-0.93853		0.83608	2.9181	0.8361	-2.57886
0.72969	-2.51277	0.72811	-21.6723		0.87707	-5.91592	0.8778	-21.5234		0.87648	-5.79264	0.12634	-21.3101		0.8361	5.10051	0.83607	-0.94109		0.87706	3.20261	0.87707	-2.65202
0.77667	-2.48418	0.77451	-21.6725		0.91805	-5.66549	0.91853	-21.5236		0.91765	-5.54243	0.16845	-21.3101		0.89074	4.91945	0.89071	-0.99667		0.91804	3.10081	0.91805	-2.51898
0.82366	-2.61155	0.82091	-21.6727		0.95902	-5.50416	0.95927	-21.5234		0.95883	-5.38142	0.22124	-21.3102		0.94537	4.61429	0.94536	-0.95014		0.95902	3.03966	0.95902	-2.20297
0.87064	-2.82704	0.86731	-21.6726		1	-5.44914	1	-21.5237		1	-5.32654	0.27403	-21.3104		1	4.44272	1	-0.8532		1	2.95008	1	-1.95005
0.91376	-2.72731	0.91154	-21.6725		0	--	0	--		0	--	0.32682	-21.3106		0	--	0	--		0	--	0	--
0.95688	-2.59613	0.95577	-21.672		0	-4.60719	0	-21.5234		0	-4.4259	0.37306	-21.31		0	4.76671	0	-0.6852		0	3.2284	0	-1.94944
1	-2.62469	1	-21.6718		0.04098	-4.51991	0.04073	-21.5234		0.04117	-4.35166	0.4193	-21.311		0.05463	4.8069	0.05464	-0.87353		0.04098	3.26829	0.04098	-2.01966
0	--	0	--		0.08195	-4.27888	0.08147	-21.5231		0.08235	-4.13879	0.46554	-21.3121		0.10926	5.09275	0.10929	-0.80834		0.08196	3.11796	0.08195	-2.51644
0	-2.4913	0	-21.6717		0.12293	-3.92044	0.1222	-21.523		0.12352	-3.80739	0.51178	-21.3121		0.1639	5.16502	0.16393	-0.93918		0.12294	3.20806	0.12293	-2.61382
0.04312	-2.47871	0.04423	-21.6719		0.1639	-3.47226	0.16293	-21.523		0.1647	-3.37803	0.55802	-21.3119		0.21857	5.14874	0.21856	-0.99249		0.16392	3.02679	0.1639	-2.4421
0.08624	-2.52111	0.08846	-21.6722		0.20488	-3.75444	0.20419	-21.5233		0.20544	-3.64267	0.60935	-21.3121		0.27324	5.35909	0.27318	-0.90585		0.2049	3.21582	0.20488	-2.60719
0.12936	-2.82703	0.13269	-21.6726		0.24586	-3.93932	0.24546	-21.5225		0.24617	-3.81688	0.66068	-21.312		0.32791	5.35901	0.32781	-0.87953		0.24588	3.35523	0.24585	-2.59003
0.17972	-2.55917	0.18222	-21.6727		0.28683	-4.00038	0.28672	-21.5216		0.28691	-3.87373	0.71201	-21.3105		0.38582	5.21545	0.38575	-0.91174		0.28686	3.65157	0.28683	-2.51357
0.23009	-2.30031	0.23176	-21.6726		0.32781	-3.91886	0.32798	-21.5208		0.32765	-3.7948	0.75185	-21.31		0.44373	5.17168	0.4437	-0.91228		0.32784	3.69547	0.3278	-2.00172
0.28045	-2.55013	0.28129	-21.6725		0.37417	-4.15215	0.37437	-21.5218		0.37398	-4.02174	0.7917	-21.3104		0.50164	4.81645	0.50164	-0.97752		0.37419	3.58147	0.37416	-2.58987
0.33082	-2.6408	0.33083	-21.6723		0.42053	-4.34538	0.42077	-21.5227		0.42032	-4.2056	0.83155	-21.3101		0.55955	4.76671	0.55959	-0.6852		0.42053	3.38693	0.42052	-2.37602
0.3787	-2.64964	0.37852	-21.6723		0.46688	-4.48907	0.46716	-21.5231		0.46666	-4.33535	0.87366	-21.3101		0.61098	4.80508	0.61105	-0.9807		0.46688	3.28234	0.46688	-2.59833
0.42658	-2.39582	0.42621	-21.6721		0.51324	-4.57739	0.51355	-21.5232		0.51299	-4.40601	0.91577	-21.3117		0.6624	5.06259	0.6625	-0.92159		0.51323	3.25759	0.51324	-2.03083
0.47447	-2.42606	0.47391	-21.672		0.5596	-4.60719	0.55994	-21.5234		0.55933	-4.4259	0.95789	-21.312		0.71382	5.07424	0.71396	-0.85704		0.55958	3.2284	0.5596	-1.94944
0.52235	-2.50188	0.5216	-21.6718		0.61106	-4.57051	0.61144	-21.5231		0.61076	-4.40102	1	-21.3119		0.77496	5.12242	0.77501	-0.9296		0.61103	3.2113	0.61106	-2.07482
0.57023	-2.4913	0.56929	-21.6717		0.66252	-4.46206	0.66293	-21.5228		0.6622	-4.31185	0	--		0.8361	5.16502	0.83607	-0.93918		0.66247	3.1059	0.66252	-2.62327
0.62338	-2.50232	0.62223	-21.6718		0.71398	-4.28672	0.71443	-21.5226		0.71363	-4.15046	0	-21.3118		0.89074	5.09275	0.89071	-0.80834		0.71392	3.33617	0.71398	-2.47525
0.67654	-2.38203	0.67517	-21.672		0.75468	-4.21348	0.75531	-21.5229		0.75419	-4.08233	0.04211	-21.3113		0.94537	4.8069	0.94536	-0.87353		0.75464	3.37093	0.75469	-2.43568
0.72969	-2.40613	0.72811	-21.6721		0.79539	-3.92018	0.79619	-21.5232		0.79475	-3.80386	0.08423	-21.3104		1	4.76671	1	-0.6852		0.79536	3.21442	0.79539	-2.71305
0.77667	-2.37913	0.77451	-21.6724		0.8361	-3.47226	0.83707	-21.523		0.8353	-3.37803	0.12634	-21.3099		0	--	0	--		0.83608	3.02679	0.8361	-2.4421
0.82366	-2.56425	0.82091	-21.6726		0.87707	-3.92044	0.8778	-21.523		0.87648	-3.80739	0.16845	-21.3101		0	4.85461	0	-0.67881		0.87706	3.20806	0.87707	-2.61382
0.87064	-2.82703	0.86731	-21.6726		0.91805	-4.27888	0.91853	-21.5231		0.91765	-4.13879	0.22124	-21.3102		0.05463	4.98417	0.05464	-0.71357		0.91804	3.11796	0.91805	-2.51644
0.91376	-2.52111	0.91154	-21.6722		0.95902	-4.51991	0.95927	-21.5234		0.95883	-4.35166	0.27403	-21.3104		0.10926	5.28066	0.10929	-0.7931		0.95902	3.26829	0.95902	-2.01966
0.95688	-2.47871	0.95577	-21.6719		1	-4.60719	1	-21.5234		1	-4.4259	0.32682	-21.3106		0.1639	5.16503	0.16393	-0.93918		1	3.2284	1	-1.94944
1	-2.4913	1	-21.6717		0	--	0	--		0	--	0.37306	-21.3098		0.21857	5.14994	0.21856	-0.99234		0	--	0	--
0	--	0	--		0	-4.60717	0	-21.5229		0	-4.42586	0.4193	-21.3103		0.27324	5.3611	0.27318	-0.90481		0	3.23252	0	-1.92652
0	-2.49128	0	-21.6715		0.04098	-4.51988	0.04073	-21.523		0.04117	-4.35154	0.46554	-21.3109		0.32791	5.35902	0.32781	-0.87947		0.04098	3.30109	0.04098	-1.98918
0.04312	-2.47865	0.04423	-21.6716		0.08195	-4.27885	0.08147	-21.5231		0.08235	-4.13857	0.51178	-21.3115		0.38582	5.40377	0.38575	-0.79081		0.08196	3.25991	0.08195	-2.51557
0.08624	-2.19314	0.08846	-21.6721		0.12293	-3.92039	0.1222	-21.523		0.12352	-3.80709	0.55802	-21.3118		0.44373	5.20682	0.4437	-0.85791		0.12294	3.30774	0.12293	-2.59055
0.12936	-2.01067	0.13269	-21.6723		0.1639	-3.47226	0.16293	-21.523		0.1647	-3.37802	0.60935	-21.3114		0.50164	5.00064	0.50164	-0.8221		0.16392	3.04936	0.1639	-2.43014
0.17972	-2.09817	0.18222	-21.6722		0.20488	-3.75444	0.20419	-21.5233		0.20544	-3.64267	0.66068	-21.3108		0.55955	4.85461	0.55959	-0.67881		0.2049	3.25316	0.20488	-2.60452
0.23009	-2.2491	0.23176	-21.6721		0.24586	-3.93929	0.24546	-21.5225		0.24617	-3.81687	0.71201	-21.3101		0.61098	4.97148	0.61105	-0.8288		0.24588	3.36809	0.24585	-2.58619
0.28045	-2.46217	0.28129	-21.6721		0.28683	-4.00034	0.28672	-21.5216		0.28691	-3.87371	0.75185	-21.3099		0.6624	5.19555	0.6625	-0.75462		0.28686	3.6563	0.28683	-2.51102
0.33082	-2.64079	0.33083	-21.6722		0.32781	-3.91885	0.32798	-21.5207		0.32765	-3.79479	0.7917	-21.3097		0.71382	5.43834	0.71396	-0.849		0.32784	3.69946	0.3278	-2.00104
0.3787	-2.44849	0.37852	-21.672		0.37417	-3.74825	0.37437	-21.5213		0.37398	-3.63363	0.83155	-21.3101		0.77496	5.23405	0.77501	-0.88766		0.37419	3.70836	0.37416	-2.44654
0.42658	-2.29513	0.42621	-21.6716		0.42053	-3.39764	0.42077	-21.5221		0.42032	-3.28147	0.87366	-21.3099		0.8361	5.16503	0.83607	-0.93918		0.42053	3.45483	0.42052	-2.35313
0.47447	-2.16555	0.47391	-21.6714		0.46688	-3.9282	0.46716	-21.5224		0.46666	-3.79439	0.91577	-21.3104		0.89074	5.28066	0.89071	-0.7931		0.46688	3.30499	0.46688	-2.37944
0.52235	-2.36256	0.5216	-21.6714		0.51324	-4.41737	0.51355	-21.5225		0.51299	-4.25078	0.95789	-21.3113		0.94537	4.98417	0.94536	-0.71357		0.51323	3.27918	0.51324	-2.01534
0.57023	-2.49128	0.56929	-21.6715		0.5596	-4.60717	0.55994	-21.5229		0.55933	-4.42586	1	-21.3118		1	4.85461	1	-0.67881		0.55958	3.23252	0.5596	-1.92652
0.62338	-2.32932	0.62223	-21.6714		0.61106	-4.3757	0.61144	-21.5225		0.61076	-4.21211	0	--		0	--	0	--		0.61103	3.26389	0.61106	-2.07386
0.67654	-2.14885	0.67517	-21.6714		0.66252	-3.79422	0.66293	-21.5223		0.6622	-3.66939	0	-21.3105		0	4.86002	0	-0.65761		0.66247	3.33227	0.66252	-2.30389
0.72969	-2.35026	0.72811	-21.6718		0.71398	-3.48285	0.71443	-21.5218		0.71363	-3.36571	0.04211	-21.3103		0.05463	4.98879	0.05464	-0.69228		0.71392	3.36969	0.71398	-2.44765
0.77667	-2.33909	0.77451	-21.6722		0.75468	-3.51342	0.75531	-21.5223		0.75419	-3.40056	0.08423	-21.3098		0.10926	5.28515	0.10929	-0.77519		0.75464	3.43483	0.75469	-2.25013
0.82366	-2.15331	0.82091	-21.6724		0.79539	-3.51645	0.79619	-21.523		0.79475	-3.41122	0.12634	-21.3095		0.1639	5.16861	0.16393	-0.88411		0.79536	3.33171	0.79539	-2.68464
0.87064	-2.01067	0.86731	-21.6723		0.8361	-3.47226	0.83707	-21.523		0.8353	-3.37802	0.16845	-21.3088		0.21857	5.27314	0.21856	-0.87939		0.83608	3.04936	0.8361	-2.43014
0.91376	-2.19314	0.91154	-21.6721		0.87707	-3.92039	0.8778	-21.523		0.87648	-3.80709	0.22124	-21.3088		0.27324	5.42331	0.27318	-0.69769		0.87706	3.30774	0.87707	-2.59055
0.95688	-2.47865	0.95577	-21.6716		0.91805	-4.27885	0.91853	-21.5231		0.91765	-4.13857	0.27403	-21.3087		0.32791	5.61072	0.32781	-0.66453		0.91804	3.25991	0.91805	-2.51557
1	-2.49128	1	-21.6715		0.95902	-4.51988	0.95927	-21.523		0.95883	-4.35154	0.32682	-21.3087		0.38582	5.40503	0.38575	-0.72495		0.95902	3.30109	0.95902	-1.98918
0	--	0	--		1	-4.60717	1	-21.5229		1	-4.42586	0.37306	-21.3097		0.44373	5.38044	0.4437	-0.74532		1	3.23252	1	-1.92652
0	-2.34513	0	-21.6711		0	--	0	--		0	--	0.4193	-21.3098		0.50164	5.01392	0.50164	-0.60431		0	--	0	--
0.04312	-2.23025	0.04423	-21.6713		0	-3.33845	0	-21.5222		0	-3.22032	0.46554	-21.3101		0.55955	4.86002	0.55959	-0.65761		0	3.25583	0	-1.89894
0.08624	-2.19308	0.08846	-21.6719		0.04098	-3.263	0.04073	-21.522		0.04117	-3.1421	0.51178	-21.3104		0.61098	4.98159	0.61105	-0.59297		0.04098	3.30944	0.04098	-1.98865
0.12936	-2.01065	0.13269	-21.6723		0.08195	-3.2498	0.08147	-21.5231		0.08235	-3.1557	0.55802	-21.3105		0.6624	5.2896	0.6625	-0.74616		0.08196	3.3351	0.08195	-2.14144
0.17972	-2.09816	0.18222	-21.6722		0.12293	-3.27393	0.1222	-21.5228		0.12352	-3.17132	0.60935	-21.3103		0.71382	5.43936	0.71396	-0.84805		0.12294	3.32125	0.12293	-2.54517
0.23009	-2.24908	0.23176	-21.6721		0.1639	-3.47218	0.16293	-21.5227		0.1647	-3.37768	0.66068	-21.31		0.77496	5.36034	0.77501	-0.87733		0.16392	3.21926	0.1639	-2.41889
0.28045	-2.46215	0.28129	-21.6721		0.20488	-3.20144	0.20419	-21.5222		0.20544	-3.09531	0.71201	-21.3098		0.8361	5.16861	0.83607	-0.88411		0.2049	3.41027	0.20488	-2.53614
0.33082	-2.64078	0.33083	-21.6722		0.24586	-3.33374	0.24546	-21.5217		0.24617	-3.23211	0.75185	-21.3096		0.89074	5.28515	0.89071	-0.77519		0.24588	3.64346	0.24585	-2.56217
0.3787	-2.23163	0.37852	-21.6717		0.28683	-3.69119	0.28672	-21.5212		0.28691	-3.57604	0.7917	-21.3092		0.94537	4.98879	0.94536	-0.69228		0.28686	3.7649	0.28683	-2.18266
0.42658	-2.23062	0.42621	-21.6714		0.32781	-3.9188	0.32798	-21.5207		0.32765	-3.79478	0.83155	-21.3088		1	4.86002	1	-0.65761		0.32784	3.72131	0.3278	-1.92152
0.47447	-2.09004	0.47391	-21.6713		0.37417	-3.74824	0.37437	-21.5211		0.37398	-3.62521	0.87366	-21.3095		0	--	0	--		0.37419	3.73901	0.37416	-2.41603
0.52235	-2.28653	0.5216	-21.671		0.42053	-3.29078	0.42077	-21.5217		0.42032	-3.20529	0.91577	-21.3098		0	5.11527	0	-0.65706		0.42053	3.48355	0.42052	-2.3498
0.57023	-2.34513	0.56929	-21.6711		0.46688	-3.23626	0.46716	-21.522		0.46666	-3.14288	0.95789	-21.3103		0.05463	5.24969	0.05464	-0.60114		0.46688	3.36037	0.46688	-2.35773
0.62338	-2.27503	0.62223	-21.671		0.51324	-3.31018	0.51355	-21.522		0.51299	-3.19199	1	-21.3105		0.10926	5.34516	0.10929	-0.75907		0.51323	3.30593	0.51324	-2.01436
0.67654	-2.13598	0.67517	-21.6713		0.5596	-3.33845	0.55994	-21.5222		0.55933	-3.22032	0	--		0.1639	5.16862	0.16393	-0.8841		0.55958	3.25583	0.5596	-1.89894
0.72969	-2.27109	0.72811	-21.6715		0.61106	-3.30365	0.61144	-21.522		0.61076	-3.18543	0	-21.3102		0.21857	5.27632	0.21856	-0.87914		0.61103	3.29043	0.61106	-2.04899
0.77667	-2.2057	0.77451	-21.6717		0.66252	-3.23782	0.66293	-21.5219		0.6622	-3.1429	0.04211	-21.3101		0.27324	5.42433	0.27318	-0.69686		0.66247	3.38376	0.66252	-2.28646
0.82366	-2.12615	0.82091	-21.672		0.71398	-3.46695	0.71443	-21.5214		0.71363	-3.36331	0.08423	-21.3097		0.32791	5.61073	0.32781	-0.66453		0.71392	3.49237	0.71398	-2.42939
0.87064	-2.01065	0.86731	-21.6723		0.75468	-3.29283	0.75531	-21.522		0.75419	-3.18759	0.12634	-21.3094		0.38582	5.6117	0.38575	-0.72399		0.75464	3.48933	0.75469	-2.23328
0.91376	-2.19308	0.91154	-21.6719		0.79539	-3.37989	0.79619	-21.5223		0.79475	-3.30042	0.16845	-21.3088		0.44373	5.39098	0.4437	-0.72819		0.79536	3.38195	0.79539	-2.48647
0.95688	-2.23025	0.95577	-21.6713		0.8361	-3.47218	0.83707	-21.5227		0.8353	-3.37768	0.22124	-21.3087		0.50164	5.18824	0.50164	-0.51981		0.83608	3.21926	0.8361	-2.41889
1	-2.34513	1	-21.6711		0.87707	-3.27393	0.8778	-21.5228		0.87648	-3.17132	0.27403	-21.3087		0.55955	5.11527	0.55959	-0.65706		0.87706	3.32125	0.87707	-2.54517
0	--	0	--		0.91805	-3.2498	0.91853	-21.5231		0.91765	-3.1557	0.32682	-21.3087		0.61098	5.17742	0.61105	-0.52843		0.91804	3.3351	0.91805	-2.14144
0	-2.34511	0	-21.6708		0.95902	-3.263	0.95927	-21.522		0.95883	-3.1421	0.37306	-21.3095		0.6624	5.29584	0.6625	-0.70893		0.95902	3.30944	0.95902	-1.98865
0.04312	-2.23021	0.04423	-21.671		1	-3.33845	1	-21.5222		1	-3.22032	0.4193	-21.3097		0.71382	5.56858	0.71396	-0.82058		1	3.25583	1	-1.89894
0.08624	-2.07944	0.08846	-21.6705		0	--	0	--		0	--	0.46554	-21.31		0.77496	5.39684	0.77501	-0.84022		0	--	0	--
0.12936	-2.01063	0.13269	-21.6698		0	-3.33842	0	-21.5215		0	-3.22031	0.51178	-21.3102		0.8361	5.16862	0.83607	-0.8841		0	3.76362	0	-1.89862
0.17972	-2.06112	0.18222	-21.6697		0.04098	-3.26297	0.04073	-21.5219		0.04117	-3.14208	0.55802	-21.3102		0.89074	5.34516	0.89071	-0.75907		0.04098	3.56893	0.04098	-1.92886
0.23009	-2.14471	0.23176	-21.6693		0.08195	-3.05175	0.08147	-21.5215		0.08235	-2.9264	0.60935	-21.3102		0.94537	5.24969	0.94536	-0.60114		0.08196	3.46099	0.08195	-2.13874
0.28045	-2.17191	0.28129	-21.6687		0.12293	-3.09943	0.1222	-21.5224		0.12352	-2.98905	0.66068	-21.31		1	5.11527	1	-0.65706		0.12294	3.38494	0.12293	-2.51211
0.33082	-2.00051	0.33083	-21.6679		0.1639	-3.47218	0.16293	-21.5227		0.1647	-3.37767	0.71201	-21.3097		0	--	0	--		0.16392	3.2607	0.1639	-2.40767
0.3787	-2.20955	0.37852	-21.6688		0.20488	-3.20144	0.20419	-21.5222		0.20544	-3.0953	0.75185	-21.3095		0	5.11848	0	-0.54941		0.2049	3.42143	0.20488	-2.53399
0.42658	-2.15791	0.42621	-21.6697		0.24586	-3.33368	0.24546	-21.5216		0.24617	-3.23208	0.7917	-21.309		0.05463	5.25433	0.05464	-0.44275		0.24588	3.65011	0.24585	-2.55413
0.47447	-2.07341	0.47391	-21.6704		0.28683	-3.69113	0.28672	-21.5211		0.28691	-3.57601	0.83155	-21.3088		0.10926	5.39462	0.10929	-0.65444		0.28686	3.76993	0.28683	-2.17559
0.52235	-2.1126	0.5216	-21.671		0.32781	-3.9188	0.32798	-21.5207		0.32765	-3.79476	0.87366	-21.3094		0.1639	5.71481	0.16393	-0.79309		0.32784	3.72509	0.3278	-1.91994
0.57023	-2.34511	0.56929	-21.6708		0.37417	-3.65996	0.37437	-21.521		0.37398	-3.54048	0.91577	-21.3097		0.21857	5.75048	0.21856	-0.70536		0.37419	3.78422	0.37416	-1.94023
0.62338	-2.08111	0.62223	-21.6709		0.42053	-3.29077	0.42077	-21.5215		0.42032	-3.19348	0.95789	-21.3101		0.27324	5.58029	0.27318	-0.65737		0.42053	3.55046	0.42052	-2.07994
0.67654	-2.06606	0.67517	-21.6703		0.46688	-3.22655	0.46716	-21.5216		0.46666	-3.10749	1	-21.3102		0.32791	5.61184	0.32781	-0.66146		0.46688	3.38993	0.46688	-2.17611
0.72969	-2.1735	0.72811	-21.6694		0.51324	-3.18154	0.51355	-21.5218		0.51299	-3.09857	0	--		0.38582	5.64073	0.38575	-0.61933		0.51323	3.38058	0.51324	-2.00121
0.77667	-2.08738	0.77451	-21.6698		0.5596	-3.33842	0.55994	-21.5215		0.55933	-3.22031	0	-21.3086		0.44373	5.52963	0.4437	-0.4969		0.55958	3.76362	0.5596	-1.89862
0.82366	-2.06001	0.82091	-21.6699		0.61106	-3.19009	0.61144	-21.522		0.61076	-3.10579	0.04211	-21.3085		0.50164	5.34814	0.50164	-0.5164		0.61103	3.40747	0.61106	-2.04264
0.87064	-2.01063	0.86731	-21.6698		0.66252	-3.21056	0.66293	-21.5218		0.6622	-3.09628	0.08423	-21.3089		0.55955	5.11848	0.55959	-0.54941		0.66247	3.45666	0.66252	-2.21787
0.91376	-2.07944	0.91154	-21.6705		0.71398	-3.46695	0.71443	-21.5214		0.71363	-3.34916	0.12634	-21.309		0.61098	5.30338	0.61105	-0.52502		0.71392	3.63453	0.71398	-2.00764
0.95688	-2.23021	0.95577	-21.671		0.75468	-3.24359	0.75531	-21.5218		0.75419	-3.18372	0.16845	-21.3084		0.6624	5.56511	0.6625	-0.4954		0.75464	3.52489	0.75469	-2.20435
1	-2.34511	1	-21.6708		0.79539	-3.23835	0.79619	-21.5222		0.79475	-3.13368	0.22124	-21.3084		0.71382	5.68181	0.71396	-0.63444		0.79536	3.40661	0.79539	-2.40541
0	--	0	--		0.8361	-3.47218	0.83707	-21.5227		0.8353	-3.37767	0.27403	-21.3085		0.77496	5.58227	0.77501	-0.79035		0.83608	3.2607	0.8361	-2.40767
0	-1.72145	0	-21.6705		0.87707	-3.09943	0.8778	-21.5224		0.87648	-2.98905	0.32682	-21.3086		0.8361	5.71481	0.83607	-0.79309		0.87706	3.38494	0.87707	-2.51211
0.04312	-1.95192	0.04423	-21.6703		0.91805	-3.05175	0.91853	-21.5215		0.91765	-2.9264	0.37306	-21.3087		0.89074	5.39462	0.89071	-0.65444		0.91804	3.46099	0.91805	-2.13874
0.08624	-2.0794	0.08846	-21.67		0.95902	-3.26297	0.95927	-21.5219		0.95883	-3.14208	0.4193	-21.3089		0.94537	5.25433	0.94536	-0.44275		0.95902	3.56893	0.95902	-1.92886
0.12936	-2.01061	0.13269	-21.6698		1	-3.33842	1	-21.5215		1	-3.22031	0.46554	-21.3086		1	5.11848	1	-0.54941		1	3.76362	1	-1.89862
0.17972	-2.0611	0.18222	-21.6697		0	--	0	--		0	--	0.51178	-21.3085		0	--	0	--		0	--	0	--
0.23009	-2.1447	0.23176	-21.6693		0	-3.12927	0	-21.5203		0	-3.05419	0.55802	-21.3086		0	5.87732	0	-0.41455		0	3.77848	0	-1.89457
0.28045	-2.17189	0.28129	-21.6687		0.04098	-3.17491	0.04073	-21.5214		0.04117	-3.09268	0.60935	-21.3085		0.05463	5.62759	0.05464	-0.22904		0.04098	3.58316	0.04098	-1.92667
0.33082	-2.0005	0.33083	-21.6679		0.08195	-3.05173	0.08147	-21.5213		0.08235	-2.92636	0.66068	-21.3086		0.10926	5.39731	0.10929	-0.64285		0.08196	3.46813	0.08195	-2.13694
0.3787	-2.0909	0.37852	-21.6685		0.12293	-2.96415	0.1222	-21.5208		0.12352	-2.87736	0.71201	-21.3089		0.1639	5.71481	0.16393	-0.79308		0.12294	3.53566	0.12293	-2.33693
0.42658	-2.03091	0.42621	-21.6692		0.1639	-3.22182	0.16293	-21.5204		0.1647	-3.11418	0.75185	-21.3088		0.21857	5.75473	0.21856	-0.70474		0.16392	3.63401	0.1639	-2.36344
0.47447	-2.00538	0.47391	-21.6699		0.20488	-3.13113	0.20419	-21.5204		0.20544	-3.06229	0.7917	-21.3087		0.27324	5.58402	0.27318	-0.65656		0.2049	3.66193	0.20488	-2.17995
0.52235	-1.76516	0.5216	-21.6703		0.24586	-3.14168	0.24546	-21.5203		0.24617	-3.04041	0.83155	-21.3084		0.32791	5.61187	0.32781	-0.66146		0.24588	3.70283	0.24585	-2.28546
0.57023	-1.72145	0.56929	-21.6705		0.28683	-3.04801	0.28672	-21.5204		0.28691	-2.95601	0.87366	-21.309		0.38582	5.66327	0.38575	-0.57808		0.28686	3.90999	0.28683	-2.1546
0.62338	-1.79374	0.62223	-21.6703		0.32781	-2.93921	0.32798	-21.5206		0.32765	-2.86031	0.91577	-21.3089		0.44373	5.53085	0.4437	-0.49529		0.32784	4.16561	0.3278	-1.91636
0.67654	-2.05642	0.67517	-21.6697		0.37417	-3.09655	0.37437	-21.5208		0.37398	-3.00143	0.95789	-21.3085		0.50164	5.69699	0.50164	-0.33837		0.37419	3.7913	0.37416	-1.90083
0.72969	-2.0156	0.72811	-21.669		0.42053	-3.28518	0.42077	-21.5212		0.42032	-3.17642	1	-21.3086		0.55955	5.87732	0.55959	-0.41455		0.42053	3.56714	0.42052	-2.07747
0.77667	-2.07564	0.77451	-21.6694		0.46688	-3.16337	0.46716	-21.5216		0.46666	-3.04954	0	--		0.61098	5.71651	0.61105	-0.28432		0.46688	3.63365	0.46688	-2.14525
0.82366	-1.96825	0.82091	-21.6695		0.51324	-3.17739	0.51355	-21.5214		0.51299	-3.0606	0	-21.3082		0.6624	5.56774	0.6625	-0.49244		0.51323	3.76802	0.51324	-1.99086
0.87064	-2.01061	0.86731	-21.6698		0.5596	-3.12927	0.55994	-21.5203		0.55933	-3.05419	0.04211	-21.3084		0.71382	5.69083	0.71396	-0.52843		0.55958	3.77848	0.5596	-1.89457
0.91376	-2.0794	0.91154	-21.67		0.61106	-3.14186	0.61144	-21.5214		0.61076	-3.02554	0.08423	-21.3085		0.77496	5.61134	0.77501	-0.6435		0.61103	3.76723	0.61106	-2.01294
0.95688	-1.95192	0.95577	-21.6703		0.66252	-3.20102	0.66293	-21.5215		0.6622	-3.08135	0.12634	-21.3088		0.8361	5.71481	0.83607	-0.79308		0.66247	3.66576	0.66252	-2.1866
1	-1.72145	1	-21.6705		0.71398	-3.17853	0.71443	-21.521		0.71363	-3.08073	0.16845	-21.3084		0.89074	5.39731	0.89071	-0.64285		0.71392	3.67688	0.71398	-1.99769
0	--	0	--		0.75468	-3.2142	0.75531	-21.5207		0.75419	-3.1143	0.22124	-21.3084		0.94537	5.62759	0.94536	-0.22904		0.75464	3.58469	0.75469	-2.18832
0	-1.62838	0	-21.6686		0.79539	-3.15982	0.79619	-21.5206		0.79475	-3.05199	0.27403	-21.3085		1	5.87732	1	-0.41455		0.79536	3.49888	0.79539	-2.26851
0.04312	-1.74624	0.04423	-21.6684		0.8361	-3.22182	0.83707	-21.5204		0.8353	-3.11418	0.32682	-21.3086		0	--	0	--		0.83608	3.63401	0.8361	-2.36344
0.08624	-1.74182	0.08846	-21.6691		0.87707	-2.96415	0.8778	-21.5208		0.87648	-2.87736	0.37306	-21.3087		0	5.87776	0	-0.04436		0.87706	3.53566	0.87707	-2.33693
0.12936	-1.6905	0.13269	-21.6695		0.91805	-3.05173	0.91853	-21.5213		0.91765	-2.92636	0.4193	-21.3085		0.05463	5.89507	0.05464	-0.22508		0.91804	3.46813	0.91805	-2.13694
0.17972	-1.69726	0.18222	-21.6693		0.95902	-3.17491	0.95927	-21.5214		0.95883	-3.09268	0.46554	-21.3082		0.10926	5.53549	0.10929	-0.25028		0.95902	3.58316	0.95902	-1.92667
0.23009	-2.13178	0.23176	-21.669		1	-3.12927	1	-21.5203		1	-3.05419	0.51178	-21.3083		0.1639	5.71872	0.16393	-0.77256		1	3.77848	1	-1.89457
0.28045	-1.99066	0.28129	-21.6684		0	--	0	--		0	--	0.55802	-21.3082		0.21857	5.93117	0.21856	-0.55316		0	--	0	--
0.33082	-2.0005	0.33083	-21.6679		0	-2.93613	0	-21.5203		0	-2.83572	0.60935	-21.3083		0.27324	6.021	0.27318	-0.37375		0	4.06897	0	-1.87145
0.3787	-1.96197	0.37852	-21.6683		0.04098	-2.9072	0.04073	-21.5205		0.04117	-2.81837	0.66068	-21.3082		0.32791	5.79204	0.32781	-0.37632		0.04098	4.02573	0.04098	-1.85497
0.42658	-2.02217	0.42621	-21.6684		0.08195	-2.92136	0.08147	-21.5212		0.08235	-2.80987	0.71201	-21.3086		0.38582	5.84989	0.38575	-0.52763		0.08196	3.76648	0.08195	-1.99611
0.47447	-1.85474	0.47391	-21.6683		0.12293	-2.96404	0.1222	-21.5205		0.12352	-2.87696	0.75185	-21.3087		0.44373	5.75004	0.4437	-0.49413		0.12294	3.54133	0.12293	-2.25812
0.52235	-1.75208	0.5216	-21.6684		0.1639	-3.22182	0.16293	-21.5204		0.1647	-3.11417	0.7917	-21.3085		0.50164	5.70733	0.50164	-0.15963		0.16392	3.64399	0.1639	-2.3522
0.57023	-1.62838	0.56929	-21.6686		0.20488	-3.13109	0.20419	-21.5203		0.20544	-3.06227	0.83155	-21.3084		0.55955	5.87776	0.55959	-0.04436		0.2049	3.66823	0.20488	-2.17947
0.62338	-1.77713	0.62223	-21.6684		0.24586	-3.14167	0.24546	-21.5202		0.24617	-3.0404	0.87366	-21.3088		0.61098	5.72826	0.61105	-0.16028		0.24588	3.71019	0.24585	-2.28497
0.67654	-1.83371	0.67517	-21.6684		0.28683	-3.048	0.28672	-21.5204		0.28691	-2.956	0.91577	-21.3085		0.6624	5.67626	0.6625	-0.36102		0.28686	3.92324	0.28683	-2.14423
0.72969	-1.98848	0.72811	-21.6684		0.32781	-2.9392	0.32798	-21.5206		0.32765	-2.8603	0.95789	-21.3084		0.71382	5.72778	0.71396	-0.51615		0.32784	4.16698	0.3278	-1.916
0.77667	-1.95854	0.77451	-21.669		0.37417	-2.95704	0.37437	-21.5204		0.37398	-2.87002	1	-21.3082		0.77496	5.75248	0.77501	-0.63481		0.37419	3.8488	0.37416	-1.90027
0.82366	-1.71466	0.82091	-21.6695		0.42053	-3.20728	0.42077	-21.5209		0.42032	-3.10945	0	--		0.8361	5.71872	0.83607	-0.77256		0.42053	3.70065	0.42052	-2.07481
0.87064	-1.6905	0.86731	-21.6695		0.46688	-2.81173	0.46716	-21.5212		0.46666	-2.70488	0	-21.3069		0.89074	5.53549	0.89071	-0.25028		0.46688	3.78155	0.46688	-2.08843
0.91376	-1.74182	0.91154	-21.6691		0.51324	-2.99693	0.51355	-21.5204		0.51299	-2.88496	0.04211	-21.3071		0.94537	5.89507	0.94536	-0.22508		0.51323	3.95642	0.51324	-1.91116
0.95688	-1.74624	0.95577	-21.6684		0.5596	-2.93613	0.55994	-21.5203		0.55933	-2.83572	0.08423	-21.3073		1	5.87776	1	-0.04436		0.55958	4.06897	0.5596	-1.87145
1	-1.62838	1	-21.6686		0.61106	-3.01064	0.61144	-21.5206		0.61076	-2.89843	0.12634	-21.3072		0	--	0	--		0.61103	3.90128	0.61106	-1.92565
0	--	0	--		0.66252	-2.84044	0.66293	-21.5212		0.6622	-2.73469	0.16845	-21.3079		0	5.90088	0	-0.04302		0.66247	3.66687	0.66252	-2.13987
0	-1.58235	0	-21.6685		0.71398	-3.08177	0.71443	-21.5207		0.71363	-3.03674	0.22124	-21.3079		0.05463	5.89711	0.05464	-0.1116		0.71392	3.75138	0.71398	-1.87439
0.04312	-1.61214	0.04423	-21.6684		0.75468	-3.11004	0.75531	-21.5205		0.75419	-3.01902	0.27403	-21.3079		0.10926	5.92038	0.10929	-0.23334		0.75464	3.63622	0.75469	-2.10838
0.08624	-1.61089	0.08846	-21.6689		0.79539	-2.95955	0.79619	-21.5202		0.79475	-2.88758	0.32682	-21.3078		0.1639	5.71873	0.16393	-0.77255		0.79536	3.62807	0.79539	-2.17663
0.12936	-1.69049	0.13269	-21.6694		0.8361	-3.22182	0.83707	-21.5204		0.8353	-3.11417	0.37306	-21.3073		0.21857	5.93499	0.21856	-0.55165		0.83608	3.64399	0.8361	-2.3522
0.17972	-1.69725	0.18222	-21.6693		0.87707	-2.96404	0.8778	-21.5205		0.87648	-2.87696	0.4193	-21.3071		0.27324	6.02203	0.27318	-0.37187		0.87706	3.54133	0.87707	-2.25812
0.23009	-2.13177	0.23176	-21.669		0.91805	-2.92136	0.91853	-21.5212		0.91765	-2.80987	0.46554	-21.3073		0.32791	5.79204	0.32781	-0.37631		0.91804	3.76648	0.91805	-1.99611
0.28045	-1.99064	0.28129	-21.6684		0.95902	-2.9072	0.95927	-21.5205		0.95883	-2.81837	0.51178	-21.3071		0.38582	5.87175	0.38575	-0.52631		0.95902	4.02573	0.95902	-1.85497
0.33082	-2.00049	0.33083	-21.6679		1	-2.93613	1	-21.5203		1	-2.83572	0.55802	-21.3069		0.44373	5.8116	0.4437	-0.39988		1	4.06897	1	-1.87145
0.3787	-1.91001	0.37852	-21.6681		0	--	0	--		0	--	0.60935	-21.3071		0.50164	6.09324	0.50164	-0.13225		0	--	0	--
0.42658	-1.8412	0.42621	-21.6683		0	-2.93602	0	-21.5195		0	-2.80834	0.66068	-21.3073		0.55955	5.90088	0.55959	-0.04302		0	4.19501	0	-1.72041
0.47447	-1.76246	0.47391	-21.6683		0.04098	-2.87205	0.04073	-21.5194		0.04117	-2.741	0.71201	-21.307		0.61098	6.07985	0.61105	-0.12527		0.04098	4.08526	0.04098	-1.85135
0.52235	-1.73802	0.5216	-21.6684		0.08195	-2.8211	0.08147	-21.5195		0.08235	-2.74114	0.75185	-21.3072		0.6624	5.86801	0.6625	-0.35616		0.08196	3.90334	0.08195	-1.9784
0.57023	-1.58235	0.56929	-21.6685		0.12293	-2.75719	0.1222	-21.5199		0.12352	-2.63483	0.7917	-21.3076		0.71382	5.85294	0.71396	-0.51412		0.12294	3.75409	0.12293	-2.22253
0.62338	-1.74088	0.62223	-21.6683		0.1639	-2.50089	0.16293	-21.5198		0.1647	-2.4197	0.83155	-21.3079		0.77496	5.76938	0.77501	-0.28614		0.16392	3.68031	0.1639	-2.33397
0.67654	-1.8178	0.67517	-21.6683		0.20488	-2.88179	0.20419	-21.5199		0.20544	-2.79658	0.87366	-21.3072		0.8361	5.71873	0.83607	-0.77255		0.2049	3.69077	0.20488	-2.07157
0.72969	-1.93602	0.72811	-21.6682		0.24586	-2.86192	0.24546	-21.52		0.24617	-2.78979	0.91577	-21.3073		0.89074	5.92038	0.89071	-0.23334		0.24588	3.8842	0.24585	-1.92499
0.77667	-1.94782	0.77451	-21.6687		0.28683	-2.88277	0.28672	-21.52		0.28691	-2.79193	0.95789	-21.3071		0.94537	5.89711	0.94536	-0.1116		0.28686	4.00261	0.28683	-1.86212
0.82366	-1.68638	0.82091	-21.6692		0.32781	-2.93919	0.32798	-21.5206		0.32765	-2.86029	1	-21.3069		1	5.90088	1	-0.04302		0.32784	4.17011	0.3278	-1.90443
0.87064	-1.69049	0.86731	-21.6694		0.37417	-2.95703	0.37437	-21.5203		0.37398	-2.85311	0	--		0	--	0	--		0.37419	3.90021	0.37416	-1.87961
0.91376	-1.61089	0.91154	-21.6689		0.42053	-3.09103	0.42077	-21.5201		0.42032	-2.96269	0	-21.3061		0	5.90113	0	0.06228		0.42053	3.7702	0.42052	-2.05783
0.95688	-1.61214	0.95577	-21.6684		0.46688	-2.81173	0.46716	-21.52		0.46666	-2.69684	0.04211	-21.306		0.05463	6.03946	0.05464	-0.10384		0.46688	3.87777	0.46688	-2.08448
1	-1.58235	1	-21.6685		0.51324	-2.75927	0.51355	-21.5197		0.51299	-2.64825	0.08423	-21.3062		0.10926	5.92214	0.10929	-0.19364		0.51323	4.01473	0.51324	-1.91042
0	--	0	--		0.5596	-2.93602	0.55994	-21.5195		0.55933	-2.80834	0.12634	-21.307		0.1639	5.78265	0.16393	0.05737		0.55958	4.19501	0.5596	-1.72041
0	-1.58126	0	-21.668		0.61106	-2.7201	0.61144	-21.5198		0.61076	-2.61042	0.16845	-21.3078		0.21857	5.94327	0.21856	-0.08897		0.61103	4.00267	0.61106	-1.90565
0.04312	-1.53811	0.04423	-21.6684		0.66252	-2.84044	0.66293	-21.5201		0.6622	-2.72777	0.22124	-21.3078		0.27324	6.11121	0.27318	-0.32998		0.66247	3.79972	0.66252	-2.13787
0.08624	-1.5641	0.08846	-21.6681		0.71398	-3.03591	0.71443	-21.5201		0.71363	-2.89165	0.27403	-21.3078		0.32791	5.79585	0.32781	-0.37406		0.71392	3.7868	0.71398	-1.85059
0.12936	-1.48635	0.13269	-21.6678		0.75468	-3.06005	0.75531	-21.5199		0.75419	-2.95542	0.32682	-21.3078		0.38582	6.00709	0.38575	-0.40459		0.75464	3.70178	0.75469	-2.08227
0.17972	-1.69417	0.18222	-21.6677		0.79539	-2.90153	0.79619	-21.5201		0.79475	-2.81392	0.37306	-21.3072		0.44373	6.09393	0.4437	-0.35195		0.79536	3.6648	0.79539	-2.16065
0.23009	-1.71351	0.23176	-21.6675		0.8361	-2.50089	0.83707	-21.5198		0.8353	-2.4197	0.4193	-21.3065		0.50164	6.11042	0.50164	-0.12782		0.83608	3.68031	0.8361	-2.33397
0.28045	-1.78758	0.28129	-21.6671		0.87707	-2.75719	0.8778	-21.5199		0.87648	-2.63483	0.46554	-21.306		0.55955	5.90113	0.55959	0.06228		0.87706	3.75409	0.87707	-2.22253
0.33082	-1.81177	0.33083	-21.6677		0.91805	-2.8211	0.91853	-21.5195		0.91765	-2.74114	0.51178	-21.3061		0.61098	6.11199	0.61105	-0.11427		0.91804	3.90334	0.91805	-1.9784
0.3787	-1.8594	0.37852	-21.6673		0.95902	-2.87205	0.95927	-21.5194		0.95883	-2.741	0.55802	-21.3061		0.6624	6.17253	0.6625	-0.29585		0.95902	4.08526	0.95902	-1.85135
0.42658	-1.78345	0.42621	-21.6675		1	-2.93602	1	-21.5195		1	-2.80834	0.60935	-21.3061		0.71382	5.89968	0.71396	-0.43818		1	4.19501	1	-1.72041
0.47447	-1.7377	0.47391	-21.668		0	--	0	--		0	--	0.66068	-21.306		0.77496	6.03336	0.77501	-0.23523		0	--	0	--
0.52235	-1.63423	0.5216	-21.6682		0	-2.4647	0	-21.5195		0	-2.35663	0.71201	-21.3068		0.8361	5.78265	0.83607	0.05737		0	4.20492	0	-1.71941
0.57023	-1.58126	0.56929	-21.668		0.04098	-2.70364	0.04073	-21.5191		0.04117	-2.59262	0.75185	-21.3071		0.89074	5.92214	0.89071	-0.19364		0.04098	4.1493	0.04098	-1.81109
0.62338	-1.64881	0.62223	-21.6682		0.08195	-2.70032	0.08147	-21.5192		0.08235	-2.58156	0.7917	-21.3075		0.94537	6.03946	0.94536	-0.10384		0.08196	4.0475	0.08195	-1.95016
0.67654	-1.76707	0.67517	-21.6679		0.12293	-2.75717	0.1222	-21.5192		0.12352	-2.63472	0.83155	-21.3078		1	5.90113	1	0.06228		0.12294	3.88382	0.12293	-2.20168
0.72969	-1.79238	0.72811	-21.6674		0.1639	-2.50089	0.16293	-21.5198		0.1647	-2.41968	0.87366	-21.307		0	--	0	--		0.16392	3.69172	0.1639	-2.31522
0.77667	-1.74478	0.77451	-21.6677		0.20488	-2.88175	0.20419	-21.5198		0.20544	-2.79655	0.91577	-21.3062		0	6.29201	0	0.16782		0.2049	3.69697	0.20488	-2.06435
0.82366	-1.6687	0.82091	-21.6678		0.24586	-2.86188	0.24546	-21.52		0.24617	-2.78977	0.95789	-21.306		0.05463	6.22808	0.05464	0.19016		0.24588	3.89105	0.24585	-1.91142
0.87064	-1.48635	0.86731	-21.6678		0.28683	-2.88274	0.28672	-21.5199		0.28691	-2.7919	1	-21.3061		0.10926	6.40831	0.10929	-0.14607		0.28686	4.00678	0.28683	-1.84074
0.91376	-1.5641	0.91154	-21.6681		0.32781	-2.93919	0.32798	-21.5205		0.32765	-2.86028	0	--		0.1639	5.78265	0.16393	0.05737		0.32784	4.17219	0.3278	-1.89026
0.95688	-1.53811	0.95577	-21.6684		0.37417	-2.90995	0.37437	-21.5202		0.37398	-2.85311	0	-21.3053		0.21857	5.95874	0.21856	-0.08823		0.37419	4.01991	0.37416	-1.87547
1	-1.58126	1	-21.668		0.42053	-2.91935	0.42077	-21.5199		0.42032	-2.81938	0.04211	-21.3055		0.27324	6.11668	0.27318	-0.32925		0.42053	3.86904	0.42052	-1.85779
0	--	0	--		0.46688	-2.76499	0.46716	-21.5195		0.46666	-2.65634	0.08423	-21.3061		0.32791	5.79587	0.32781	-0.37405		0.46688	3.89537	0.46688	-1.7994
0	-1.49894	0	-21.668		0.51324	-2.65316	0.51355	-21.5195		0.51299	-2.54374	0.12634	-21.3069		0.38582	6.02378	0.38575	-0.24369		0.51323	4.22365	0.51324	-1.88925
0.04312	-1.48525	0.04423	-21.6683		0.5596	-2.4647	0.55994	-21.5195		0.55933	-2.35663	0.16845	-21.3076		0.44373	6.12881	0.4437	-0.01384		0.55958	4.20492	0.5596	-1.71941
0.08624	-1.51134	0.08846	-21.6679		0.61106	-2.6725	0.61144	-21.5195		0.61076	-2.56319	0.22124	-21.3076		0.50164	6.14338	0.50164	0.08565		0.61103	4.22829	0.61106	-1.89677
0.12936	-1.48634	0.13269	-21.6678		0.66252	-2.8082	0.66293	-21.5196		0.6622	-2.72544	0.27403	-21.3077		0.55955	6.29201	0.55959	0.16782		0.66247	3.8447	0.66252	-1.8126
0.17972	-1.69415	0.18222	-21.6677		0.71398	-2.94038	0.71443	-21.52		0.71363	-2.84394	0.32682	-21.3078		0.61098	6.12645	0.61105	0.13792		0.71392	3.91197	0.71398	-1.84818
0.23009	-1.7135	0.23176	-21.6675		0.75468	-2.98353	0.75531	-21.5195		0.75419	-2.84366	0.37306	-21.3072		0.6624	6.2077	0.6625	-0.00999		0.75464	3.7682	0.75469	-2.06465
0.28045	-1.78757	0.28129	-21.6671		0.79539	-2.77633	0.79619	-21.5196		0.79475	-2.66295	0.4193	-21.3063		0.71382	5.93935	0.71396	-0.13089		0.79536	3.76222	0.79539	-2.14353
0.33082	-1.81175	0.33083	-21.6677		0.8361	-2.50089	0.83707	-21.5198		0.8353	-2.41968	0.46554	-21.3059		0.77496	6.10208	0.77501	-0.16931		0.83608	3.69172	0.8361	-2.31522
0.3787	-1.8249	0.37852	-21.6671		0.87707	-2.75717	0.8778	-21.5192		0.87648	-2.63472	0.51178	-21.3054		0.8361	5.78265	0.83607	0.05737		0.87706	3.88382	0.87707	-2.20168
0.42658	-1.68753	0.42621	-21.6674		0.91805	-2.70032	0.91853	-21.5192		0.91765	-2.58156	0.55802	-21.3053		0.89074	6.40831	0.89071	-0.14607		0.91804	4.0475	0.91805	-1.95016
0.47447	-1.68869	0.47391	-21.668		0.95902	-2.70364	0.95927	-21.5191		0.95883	-2.59262	0.60935	-21.3054		0.94537	6.22808	0.94536	0.19016		0.95902	4.1493	0.95902	-1.81109
0.52235	-1.53097	0.5216	-21.6681		1	-2.4647	1	-21.5195		1	-2.35663	0.66068	-21.306		1	6.29201	1	0.16782		1	4.20492	1	-1.71941
0.57023	-1.49894	0.56929	-21.668		0	--	0	--		0	--	0.71201	-21.3066		0	--	0	--		0	--	0	--
0.62338	-1.53157	0.62223	-21.6682		0	-2.46469	0	-21.5194		0	-2.3561	0.75185	-21.307		0	6.35712	0	0.35337		0	4.57972	0	-1.71932
0.67654	-1.66093	0.67517	-21.6679		0.04098	-2.46937	0.04073	-21.5189		0.04117	-2.35708	0.7917	-21.3074		0.05463	6.33462	0.05464	0.19473		0.04098	4.62497	0.04098	-1.80401
0.72969	-1.74272	0.72811	-21.6673		0.08195	-2.54384	0.08147	-21.5187		0.08235	-2.43379	0.83155	-21.3076		0.10926	6.42258	0.10929	0.11501		0.08196	4.28963	0.08195	-1.92749
0.77667	-1.65743	0.77451	-21.6675		0.12293	-2.6795	0.1222	-21.5188		0.12352	-2.60619	0.87366	-21.3069		0.1639	6.29896	0.16393	0.07347		0.12294	3.88903	0.12293	-2.15317
0.82366	-1.62441	0.82091	-21.6677		0.1639	-2.50083	0.16293	-21.5181		0.1647	-2.39376	0.91577	-21.3061		0.21857	6.03275	0.21856	-0.05238		0.16392	3.79296	0.1639	-2.23842
0.87064	-1.48634	0.86731	-21.6678		0.20488	-2.69781	0.20419	-21.5185		0.20544	-2.58766	0.95789	-21.3055		0.27324	6.22578	0.27318	-0.22985		0.2049	3.81534	0.20488	-2.06223
0.91376	-1.51134	0.91154	-21.6679		0.24586	-2.79326	0.24546	-21.5189		0.24617	-2.7133	1	-21.3053		0.32791	6.5635	0.32781	-0.07133		0.24588	3.95811	0.24585	-1.90428
0.95688	-1.48525	0.95577	-21.6683		0.28683	-2.74481	0.28672	-21.5196		0.28691	-2.66148	0	--		0.38582	6.23594	0.38575	-0.14176		0.28686	4.20553	0.28683	-1.83922
1	-1.49894	1	-21.668		0.32781	-2.69338	0.32798	-21.5197		0.32765	-2.57292	0	-21.3052		0.44373	6.43013	0.4437	0.09321		0.32784	4.17941	0.3278	-1.88984
0	--	0	--		0.37417	-2.85304	0.37437	-21.5199		0.37398	-2.73558	0.04211	-21.3055		0.50164	6.35437	0.50164	0.28086		0.37419	4.20052	0.37416	-1.86742
0	-1.46531	0	-21.6678		0.42053	-2.91935	0.42077	-21.5198		0.42032	-2.80559	0.08423	-21.3058		0.55955	6.35712	0.55959	0.35337		0.42053	4.30079	0.42052	-1.83512
0.04312	-1.48519	0.04423	-21.6677		0.46688	-2.66411	0.46716	-21.5195		0.46666	-2.58861	0.12634	-21.3067		0.61098	6.3424	0.61105	0.29601		0.46688	4.29639	0.46688	-1.78324
0.08624	-1.51127	0.08846	-21.6677		0.51324	-2.65315	0.51355	-21.5192		0.51299	-2.53997	0.16845	-21.3075		0.6624	6.35438	0.6625	0.1416		0.51323	4.70232	0.51324	-1.83524
0.12936	-1.35577	0.13269	-21.6675		0.5596	-2.46469	0.55994	-21.5194		0.55933	-2.3561	0.22124	-21.3076		0.71382	6.40393	0.71396	-0.0611		0.55958	4.57972	0.5596	-1.71932
0.17972	-1.31645	0.18222	-21.6674		0.61106	-2.6725	0.61144	-21.5193		0.61076	-2.55907	0.27403	-21.3077		0.77496	6.20657	0.77501	0.02434		0.61103	4.66549	0.61106	-1.82135
0.23009	-1.25601	0.23176	-21.6673		0.66252	-2.80819	0.66293	-21.5195		0.6622	-2.70296	0.32682	-21.3077		0.8361	6.29896	0.83607	0.07347		0.66247	4.32691	0.66252	-1.79396
0.28045	-1.61727	0.28129	-21.667		0.71398	-2.94038	0.71443	-21.5199		0.71363	-2.8284	0.37306	-21.3071		0.89074	6.42258	0.89071	0.11501		0.71392	4.26005	0.71398	-1.82443
0.33082	-1.81175	0.33083	-21.6677		0.75468	-2.80257	0.75531	-21.5194		0.75419	-2.68367	0.4193	-21.3062		0.94537	6.33462	0.94536	0.19473		0.75464	4.05674	0.75469	-2.06376
0.3787	-1.66678	0.37852	-21.6671		0.79539	-2.74177	0.79619	-21.5188		0.79475	-2.65362	0.46554	-21.3057		1	6.35712	1	0.35337		0.79536	3.89769	0.79539	-2.0819
0.42658	-1.52306	0.42621	-21.6673		0.8361	-2.50083	0.83707	-21.5181		0.8353	-2.39376	0.51178	-21.3054		0	--	0	--		0.83608	3.79296	0.8361	-2.23842
0.47447	-1.57049	0.47391	-21.6676		0.87707	-2.6795	0.8778	-21.5188		0.87648	-2.60619	0.55802	-21.3052		0	6.35725	0	0.35603		0.87706	3.88903	0.87707	-2.15317
0.52235	-1.44601	0.5216	-21.6678		0.91805	-2.54384	0.91853	-21.5187		0.91765	-2.43379	0.60935	-21.3054		0.05463	6.43539	0.05464	0.42831		0.91804	4.28963	0.91805	-1.92749
0.57023	-1.46531	0.56929	-21.6678		0.95902	-2.46937	0.95927	-21.5189		0.95883	-2.35708	0.66068	-21.3058		0.10926	6.43702	0.10929	0.43566		0.95902	4.62497	0.95902	-1.80401
0.62338	-1.43505	0.62223	-21.6677		1	-2.46469	1	-21.5194		1	-2.3561	0.71201	-21.3064		0.1639	6.29896	0.16393	0.07348		1	4.57972	1	-1.71932
0.67654	-1.58905	0.67517	-21.6675		0	--	0	--		0	--	0.75185	-21.3069		0.21857	6.03519	0.21856	-0.05185		0	--	0	--
0.72969	-1.57359	0.72811	-21.6673		0	-2.46457	0	-21.5189		0	-2.35371	0.7917	-21.3074		0.27324	6.23503	0.27318	-0.22896		0	4.98908	0	-1.71854
0.77667	-1.34938	0.77451	-21.6675		0.04098	-2.46924	0.04073	-21.5186		0.04117	-2.35667	0.83155	-21.3075		0.32791	6.56351	0.32781	-0.07131		0.04098	4.69494	0.04098	-1.80092
0.82366	-1.37012	0.82091	-21.6675		0.08195	-2.54369	0.08147	-21.5187		0.08235	-2.43333	0.87366	-21.3067		0.38582	6.23919	0.38575	0.13196		0.08196	4.47927	0.08195	-1.86711
0.87064	-1.35577	0.86731	-21.6675		0.12293	-2.46436	0.1222	-21.5184		0.12352	-2.36649	0.91577	-21.3058		0.44373	6.4423	0.4437	0.53435		0.12294	4.00647	0.12293	-2.12344
0.91376	-1.51127	0.91154	-21.6677		0.1639	-2.50083	0.16293	-21.5181		0.1647	-2.39376	0.95789	-21.3055		0.50164	6.36197	0.50164	0.43027		0.16392	3.80319	0.1639	-2.2379
0.95688	-1.48519	0.95577	-21.6677		0.20488	-2.69778	0.20419	-21.5184		0.20544	-2.58764	1	-21.3052		0.55955	6.35725	0.55959	0.35603		0.2049	3.82476	0.20488	-2.04992
1	-1.46531	1	-21.6678		0.24586	-2.79322	0.24546	-21.5188		0.24617	-2.71327	0	--		0.61098	6.35808	0.61105	0.38064		0.24588	3.96883	0.24585	-1.89381
0	--	0	--		0.28683	-2.74477	0.28672	-21.5196		0.28691	-2.66146	0	-21.3047		0.6624	6.39115	0.6625	0.59702		0.28686	4.21818	0.28683	-1.81868
0	-1.46524	0	-21.6678		0.32781	-2.69338	0.32798	-21.5197		0.32765	-2.57291	0.04211	-21.3047		0.71382	6.4086	0.71396	0.26591		0.32784	4.19295	0.3278	-1.87961
0.04312	-1.35399	0.04423	-21.6675		0.37417	-2.51071	0.37437	-21.5195		0.37398	-2.42842	0.08423	-21.3057		0.77496	6.34388	0.77501	0.11328		0.37419	4.20609	0.37416	-1.85919
0.08624	-1.38248	0.08846	-21.6673		0.42053	-2.27917	0.42077	-21.5191		0.42032	-2.18292	0.12634	-21.3067		0.8361	6.29896	0.83607	0.07348		0.42053	4.30763	0.42052	-1.83314
0.12936	-1.35575	0.13269	-21.6675		0.46688	-2.6641	0.46716	-21.5189		0.46666	-2.56111	0.16845	-21.3064		0.89074	6.43702	0.89071	0.43566		0.46688	4.47001	0.46688	-1.78032
0.17972	-1.31643	0.18222	-21.6674		0.51324	-2.2986	0.51355	-21.5187		0.51299	-2.20278	0.22124	-21.3063		0.94537	6.43539	0.94536	0.42831		0.51323	4.70667	0.51324	-1.74837
0.23009	-1.256	0.23176	-21.6673		0.5596	-2.46457	0.55994	-21.5189		0.55933	-2.35371	0.27403	-21.3059		1	6.35725	1	0.35603		0.55958	4.98908	0.5596	-1.71854
0.28045	-1.61726	0.28129	-21.667		0.61106	-2.29346	0.61144	-21.5187		0.61076	-2.20237	0.32682	-21.3056		0	--	0	--		0.61103	4.67626	0.61106	-1.74689
0.33082	-1.81173	0.33083	-21.6676		0.66252	-2.65644	0.66293	-21.5189		0.6622	-2.55063	0.37306	-21.3062		0	6.38482	0	0.67282		0.66247	4.42696	0.66252	-1.79221
0.3787	-1.63309	0.37852	-21.6671		0.71398	-2.29619	0.71443	-21.5192		0.71363	-2.20328	0.4193	-21.3061		0.05463	6.43752	0.05464	0.6446		0.71392	4.26649	0.71398	-1.82348
0.42658	-1.43959	0.42621	-21.6671		0.75468	-2.44682	0.75531	-21.5189		0.75419	-2.42738	0.46554	-21.3054		0.10926	6.44224	0.10929	0.79534		0.75464	4.43768	0.75469	-1.99625
0.47447	-1.33225	0.47391	-21.6673		0.79539	-2.60691	0.79619	-21.5182		0.79475	-2.51275	0.51178	-21.3047		0.1639	6.30359	0.16393	0.94687		0.79536	3.92158	0.79539	-2.01356
0.52235	-1.3391	0.5216	-21.6675		0.8361	-2.50083	0.83707	-21.5181		0.8353	-2.39376	0.55802	-21.3047		0.21857	6.597	0.21856	0.93139		0.83608	3.80319	0.8361	-2.2379
0.57023	-1.46524	0.56929	-21.6678		0.87707	-2.46436	0.8778	-21.5184		0.87648	-2.36649	0.60935	-21.3047		0.27324	6.35506	0.27318	0.40004		0.87706	4.00647	0.87707	-2.12344
0.62338	-1.37718	0.62223	-21.6675		0.91805	-2.54369	0.91853	-21.5187		0.91765	-2.43333	0.66068	-21.3056		0.32791	6.5773	0.32781	-0.07066		0.91804	4.47927	0.91805	-1.86711
0.67654	-1.37758	0.67517	-21.6673		0.95902	-2.46924	0.95927	-21.5186		0.95883	-2.35667	0.71201	-21.3063		0.38582	6.6265	0.38575	0.13415		0.95902	4.69494	0.95902	-1.80092
0.72969	-1.4332	0.72811	-21.667		1	-2.46457	1	-21.5189		1	-2.35371	0.75185	-21.3066		0.44373	6.46603	0.4437	0.53702		1	4.98908	1	-1.71854
0.77667	-1.2463	0.77451	-21.6672		0	--	0	--		0	--	0.7917	-21.3066		0.50164	6.36862	0.50164	0.70659		0	--	0	--
0.82366	-1.34617	0.82091	-21.6674		0	-2.46456	0	-21.5186		0	-2.35332	0.83155	-21.3064		0.55955	6.38482	0.55959	0.67282		0	4.99861	0	-1.71172
0.87064	-1.35575	0.86731	-21.6675		0.04098	-2.23065	0.04073	-21.5184		0.04117	-2.12957	0.87366	-21.3067		0.61098	6.39056	0.61105	0.72144		0.04098	4.96706	0.04098	-1.79075
0.91376	-1.38248	0.91154	-21.6673		0.08195	-2.21473	0.08147	-21.5182		0.08235	-2.15482	0.91577	-21.3057		0.6624	6.41271	0.6625	0.59957		0.08196	4.49083	0.08195	-1.86012
0.95688	-1.35399	0.95577	-21.6675		0.12293	-2.38396	0.1222	-21.5182		0.12352	-2.29048	0.95789	-21.3047		0.71382	6.66294	0.71396	0.26846		0.12294	4.20118	0.12293	-1.75785
1	-1.46524	1	-21.6678		0.1639	-2.48573	0.16293	-21.5181		0.1647	-2.39355	1	-21.3047		0.77496	6.494	0.77501	0.837		0.16392	4.78989	0.1639	-2.23659
0	--	0	--		0.20488	-2.26761	0.20419	-21.5182		0.20544	-2.16583	0	--		0.8361	6.30359	0.83607	0.94687		0.2049	4.82279	0.20488	-1.89037
0	-1.11976	0	-21.6654		0.24586	-2.12697	0.24546	-21.5188		0.24617	-2.03192	0	-21.3045		0.89074	6.44224	0.89071	0.79534		0.24588	4.6034	0.24585	-1.58511
0.04312	-1.25775	0.04423	-21.6653		0.28683	-2.47135	0.28672	-21.5193		0.28691	-2.35922	0.04211	-21.3047		0.94537	6.43752	0.94536	0.6446		0.28686	4.3747	0.28683	-1.36717
0.08624	-1.02164	0.08846	-21.6653		0.32781	-2.69332	0.32798	-21.5196		0.32765	-2.5729	0.08423	-21.3053		1	6.38482	1	0.67282		0.32784	4.25154	0.3278	-1.87285
0.12936	-1.35573	0.13269	-21.6653		0.37417	-2.5107	0.37437	-21.5194		0.37398	-2.39935	0.12634	-21.3056		0	--	0	--		0.37419	4.47151	0.37416	-1.84279
0.17972	-1.20105	0.18222	-21.6655		0.42053	-2.25048	0.42077	-21.5188		0.42032	-2.10985	0.16845	-21.3063		0	6.38508	0	0.67793		0.42053	4.5267	0.42052	-1.81053
0.23009	-1.1096	0.23176	-21.6662		0.46688	-2.29912	0.46716	-21.5183		0.46666	-2.20242	0.22124	-21.3062		0.05463	6.45791	0.05464	0.70165		0.46688	4.47819	0.46688	-1.76354
0.28045	-0.87684	0.28129	-21.667		0.51324	-2.2986	0.51355	-21.5185		0.51299	-2.18744	0.27403	-21.3058		0.10926	6.5949	0.10929	1.01479		0.51323	4.71362	0.51324	-1.74208
0.33082	-0.69224	0.33083	-21.6667		0.5596	-2.46456	0.55994	-21.5186		0.55933	-2.35332	0.32682	-21.3055		0.1639	6.30359	0.16393	0.94688		0.55958	4.99861	0.5596	-1.71172
0.3787	-1.05715	0.37852	-21.667		0.61106	-2.29346	0.61144	-21.5185		0.61076	-2.18246	0.37306	-21.3057		0.21857	6.60534	0.21856	0.93338		0.61103	4.68477	0.61106	-1.73728
0.42658	-1.34578	0.42621	-21.6666		0.66252	-2.17554	0.66293	-21.5184		0.6622	-2.08257	0.4193	-21.3057		0.27324	6.37822	0.27318	0.40016		0.66247	4.43503	0.66252	-1.77363
0.47447	-1.33092	0.47391	-21.666		0.71398	-2.26851	0.71443	-21.519		0.71363	-2.18533	0.46554	-21.305		0.32791	6.5773	0.32781	-0.07063		0.71392	4.63662	0.71398	-1.80735
0.52235	-1.26874	0.5216	-21.6655		0.75468	-2.25983	0.75531	-21.5185		0.75419	-2.15928	0.51178	-21.3046		0.38582	6.62651	0.38575	0.54342		0.75464	4.55819	0.75469	-1.83131
0.57023	-1.11976	0.56929	-21.6654		0.79539	-2.38313	0.79619	-21.5181		0.79475	-2.277	0.55802	-21.3045		0.44373	6.60049	0.4437	0.91037		0.79536	4.58805	0.79539	-2.00391
0.62338	-1.24683	0.62223	-21.6655		0.8361	-2.48573	0.83707	-21.5181		0.8353	-2.39355	0.60935	-21.3046		0.50164	6.53109	0.50164	0.71005		0.83608	4.78989	0.8361	-2.23659
0.67654	-1.30774	0.67517	-21.6661		0.87707	-2.38396	0.8778	-21.5182		0.87648	-2.29048	0.66068	-21.3052		0.55955	6.38508	0.55959	0.67793		0.87706	4.20118	0.87707	-1.75785
0.72969	-1.31753	0.72811	-21.6669		0.91805	-2.21473	0.91853	-21.5182		0.91765	-2.15482	0.71201	-21.3058		0.61098	6.52532	0.61105	0.72512		0.91804	4.49083	0.91805	-1.86012
0.77667	-1.14964	0.77451	-21.666		0.95902	-2.23065	0.95927	-21.5184		0.95883	-2.12957	0.75185	-21.3055		0.6624	6.52768	0.6625	0.81599		0.95902	4.96706	0.95902	-1.79075
0.82366	-1.28154	0.82091	-21.6655		1	-2.46456	1	-21.5186		1	-2.35332	0.7917	-21.306		0.71382	6.66314	0.71396	0.78053		1	4.99861	1	-1.71172
0.87064	-1.35573	0.86731	-21.6653		0	--	0	--		0	--	0.83155	-21.3063		0.77496	6.5804	0.77501	0.88515		0	--	0	--
0.91376	-1.02164	0.91154	-21.6653		0	-1.90056	0	-21.5186		0	-1.76544	0.87366	-21.3056		0.8361	6.30359	0.83607	0.94688		0	4.99863	0	-1.7116
0.95688	-1.25775	0.95577	-21.6653		0.04098	-1.90655	0.04073	-21.5184		0.04117	-1.77073	0.91577	-21.3053		0.89074	6.5949	0.89071	1.01479		0.04098	4.99413	0.04098	-1.78005
1	-1.11976	1	-21.6654		0.08195	-2.21467	0.08147	-21.5182		0.08235	-2.15459	0.95789	-21.3047		0.94537	6.45791	0.94536	0.70165		0.08196	5.02099	0.08195	-1.79751
0	--	0	--		0.12293	-2.38387	0.1222	-21.518		0.12352	-2.29023	1	-21.3045		1	6.38508	1	0.67793		0.12294	5.00182	0.12293	-1.67499
0	-1.11869	0	-21.6653		0.1639	-2.48573	0.16293	-21.5181		0.1647	-2.39353	0	--		0	--	0	--		0.16392	4.79176	0.1639	-2.23528
0.04312	-0.97577	0.04423	-21.6653		0.20488	-2.26759	0.20419	-21.5182		0.20544	-2.16581	0	-21.3041		0	6.57482	0	0.9273		0.2049	4.82606	0.20488	-1.88949
0.08624	-0.89087	0.08846	-21.6653		0.24586	-2.12692	0.24546	-21.5188		0.24617	-2.03189	0.04211	-21.3044		0.05463	6.47837	0.05464	0.9682		0.24588	4.60649	0.24585	-1.58468
0.12936	-1.3557	0.13269	-21.6653		0.28683	-2.47129	0.28672	-21.5192		0.28691	-2.35919	0.08423	-21.305		0.10926	6.63075	0.10929	1.0528		0.28686	4.37719	0.28683	-1.36641
0.17972	-1.20102	0.18222	-21.6655		0.32781	-2.69332	0.32798	-21.5196		0.32765	-2.57288	0.12634	-21.3052		0.1639	6.81689	0.16393	1.06525		0.32784	4.26509	0.3278	-1.84474
0.23009	-1.10957	0.23176	-21.6662		0.37417	-2.45617	0.37437	-21.5187		0.37398	-2.34329	0.16845	-21.3046		0.21857	6.61979	0.21856	0.94633		0.37419	4.47663	0.37416	-1.30285
0.28045	-0.87681	0.28129	-21.6669		0.42053	-2.21997	0.42077	-21.5177		0.42032	-2.08585	0.22124	-21.3047		0.27324	6.87293	0.27318	0.86218		0.42053	4.71635	0.42052	-1.70073
0.33082	-0.69222	0.33083	-21.6666		0.46688	-2.09452	0.46716	-21.5179		0.46666	-1.95004	0.27403	-21.3051		0.32791	7.0526	0.32781	0.83101		0.46688	4.92846	0.46688	-1.67858
0.3787	-0.88984	0.37852	-21.667		0.51324	-1.95409	0.51355	-21.5181		0.51299	-1.81697	0.32682	-21.3055		0.38582	6.80837	0.38575	0.8371		0.51323	4.81244	0.51324	-1.73316
0.42658	-1.03012	0.42621	-21.6665		0.5596	-1.90056	0.55994	-21.5186		0.55933	-1.76544	0.37306	-21.3052		0.44373	6.60521	0.4437	0.91323		0.55958	4.99863	0.5596	-1.7116
0.47447	-1.07417	0.47391	-21.6659		0.61106	-1.96604	0.61144	-21.5181		0.61076	-1.83365	0.4193	-21.3049		0.50164	6.55436	0.50164	0.82341		0.61103	4.8071	0.61106	-1.73461
0.52235	-1.15271	0.5216	-21.6654		0.66252	-2.13167	0.66293	-21.5178		0.6622	-1.98433	0.46554	-21.3047		0.55955	6.57482	0.55959	0.9273		0.66247	4.88839	0.66252	-1.59518
0.57023	-1.11869	0.56929	-21.6653		0.71398	-2.26096	0.71443	-21.518		0.71363	-2.16682	0.51178	-21.3044		0.61098	6.56192	0.61105	0.79143		0.71392	4.66286	0.71398	-1.8015
0.62338	-1.16786	0.62223	-21.6655		0.75468	-2.20766	0.75531	-21.518		0.75419	-2.03423	0.55802	-21.3041		0.6624	6.5341	0.6625	0.97421		0.75464	4.59173	0.75469	-1.81837
0.67654	-1.03373	0.67517	-21.666		0.79539	-2.23502	0.79619	-21.518		0.79475	-2.13512	0.60935	-21.3044		0.71382	6.66317	0.71396	0.84398		0.79536	4.82263	0.79539	-1.90027
0.72969	-0.99463	0.72811	-21.6667		0.8361	-2.48573	0.83707	-21.5181		0.8353	-2.39353	0.66068	-21.3048		0.77496	6.65002	0.77501	0.98996		0.83608	4.79176	0.8361	-2.23528
0.77667	-1.12597	0.77451	-21.666		0.87707	-2.38387	0.8778	-21.518		0.87648	-2.29023	0.71201	-21.305		0.8361	6.81689	0.83607	1.06525		0.87706	5.00182	0.87707	-1.67499
0.82366	-1.05825	0.82091	-21.6655		0.91805	-2.21467	0.91853	-21.5182		0.91765	-2.15459	0.75185	-21.3053		0.89074	6.63075	0.89071	1.0528		0.91804	5.02099	0.91805	-1.79751
0.87064	-1.3557	0.86731	-21.6653		0.95902	-1.90655	0.95927	-21.5184		0.95883	-1.77073	0.7917	-21.3049		0.94537	6.47837	0.94536	0.9682		0.95902	4.99413	0.95902	-1.78005
0.91376	-0.89087	0.91154	-21.6653		1	-1.90056	1	-21.5186		1	-1.76544	0.83155	-21.3046		1	6.57482	1	0.9273		1	4.99863	1	-1.7116
0.95688	-0.97577	0.95577	-21.6653		0	--	0	--		0	--	0.87366	-21.3052		0	--	0	--		0	--	0	--
1	-1.11869	1	-21.6653		0	-1.90047	0	-21.5182		0	-1.76525	0.91577	-21.305		0	6.60073	0	0.93126		0	5.0079	0	-1.71074
0	--	0	--		0.04098	-1.90646	0.04073	-21.5183		0.04117	-1.77054	0.95789	-21.3044		0.05463	6.61008	0.05464	0.9727		0.04098	5.00796	0.04098	-1.76827
0	-0.59202	0	-21.6652		0.08195	-2.05242	0.08147	-21.5179		0.08235	-1.9723	1	-21.3041		0.10926	6.65757	0.10929	1.0916		0.08196	5.02279	0.08195	-1.71959
0.04312	-0.76088	0.04423	-21.6652		0.12293	-2.24577	0.1222	-21.5179		0.12352	-2.18914	0	--		0.1639	6.81691	0.16393	1.06525		0.12294	5.00467	0.12293	-1.67326
0.08624	-0.89081	0.08846	-21.6653		0.1639	-2.21391	0.16293	-21.5179		0.1647	-2.13652	0	-21.304		0.21857	6.62679	0.21856	0.94655		0.16392	5.02078	0.1639	-1.6382
0.12936	-0.71595	0.13269	-21.6653		0.20488	-1.9689	0.20419	-21.5179		0.20544	-1.79327	0.04211	-21.3044		0.27324	6.88403	0.27318	0.8635		0.2049	4.8898	0.20488	-1.85643
0.17972	-0.89121	0.18222	-21.6655		0.24586	-2.0637	0.24546	-21.5176		0.24617	-1.93916	0.08423	-21.3041		0.32791	7.05262	0.32781	0.83102		0.24588	5.0938	0.24585	-1.43359
0.23009	-0.99446	0.23176	-21.6661		0.28683	-1.84132	0.28672	-21.517		0.28691	-1.74436	0.12634	-21.3039		0.38582	6.90836	0.38575	0.83858		0.28686	5.29214	0.28683	-1.11427
0.28045	-0.80827	0.28129	-21.6669		0.32781	-1.69911	0.32798	-21.5165		0.32765	-1.60137	0.16845	-21.3046		0.44373	6.69434	0.4437	0.92867		0.32784	5.51992	0.3278	-1.02942
0.33082	-0.69222	0.33083	-21.6666		0.37417	-2.08724	0.37437	-21.5169		0.37398	-1.91298	0.22124	-21.3047		0.50164	6.58707	0.50164	0.97949		0.37419	5.03225	0.37416	-1.28397
0.3787	-0.87495	0.37852	-21.6669		0.42053	-2.12132	0.42077	-21.5173		0.42032	-2.07484	0.27403	-21.305		0.55955	6.60073	0.55959	0.93126		0.42053	4.76894	0.42052	-1.62991
0.42658	-1.00638	0.42621	-21.6663		0.46688	-2.01337	0.46716	-21.5177		0.46666	-1.90481	0.32682	-21.3054		0.61098	6.58349	0.61105	0.93275		0.46688	5.20249	0.46688	-1.60977
0.47447	-0.88307	0.47391	-21.6658		0.51324	-1.86959	0.51355	-21.518		0.51299	-1.78528	0.37306	-21.3047		0.6624	6.66113	0.6625	0.97726		0.51323	5.10354	0.51324	-1.7307
0.52235	-0.71553	0.5216	-21.6654		0.5596	-1.90047	0.55994	-21.5182		0.55933	-1.76525	0.4193	-21.304		0.71382	6.76588	0.71396	0.84591		0.55958	5.0079	0.5596	-1.71074
0.57023	-0.59202	0.56929	-21.6652		0.61106	-1.89957	0.61144	-21.518		0.61076	-1.83098	0.46554	-21.3042		0.77496	6.67679	0.77501	1.09159		0.61103	5.09219	0.61106	-1.72355
0.62338	-0.71998	0.62223	-21.6655		0.66252	-2.05461	0.66293	-21.5176		0.6622	-1.94578	0.51178	-21.3044		0.8361	6.81691	0.83607	1.06525		0.66247	5.12475	0.66252	-1.53045
0.67654	-0.94122	0.67517	-21.6659		0.71398	-2.26095	0.71443	-21.5172		0.71363	-2.09284	0.55802	-21.304		0.89074	6.65757	0.89071	1.0916		0.71392	4.67497	0.71398	-1.73046
0.72969	-0.99307	0.72811	-21.6666		0.75468	-2.10669	0.75531	-21.5177		0.75419	-2.00755	0.60935	-21.3044		0.94537	6.61008	0.94536	0.9727		0.75464	4.76963	0.75469	-1.37392
0.77667	-1.11429	0.77451	-21.6659		0.79539	-2.02988	0.79619	-21.518		0.79475	-1.92986	0.66068	-21.3041		1	6.60073	1	0.93126		0.79536	4.89748	0.79539	-1.78766
0.82366	-0.89193	0.82091	-21.6654		0.8361	-2.21391	0.83707	-21.5179		0.8353	-2.13652	0.71201	-21.3042		0	--	0	--		0.83608	5.02078	0.8361	-1.6382
0.87064	-0.71595	0.86731	-21.6653		0.87707	-2.24577	0.8778	-21.5179		0.87648	-2.18914	0.75185	-21.3042		0	6.79171	0	0.93367		0.87706	5.00467	0.87707	-1.67326
0.91376	-0.89081	0.91154	-21.6653		0.91805	-2.05242	0.91853	-21.5179		0.91765	-1.9723	0.7917	-21.3044		0.05463	6.72168	0.05464	1.02945		0.91804	5.02279	0.91805	-1.71959
0.95688	-0.76088	0.95577	-21.6652		0.95902	-1.90646	0.95927	-21.5183		0.95883	-1.77054	0.83155	-21.3046		0.10926	6.67536	0.10929	1.09805		0.95902	5.00796	0.95902	-1.76827
1	-0.59202	1	-21.6652		1	-1.90047	1	-21.5182		1	-1.76525	0.87366	-21.3039		0.1639	6.82366	0.16393	1.29237		1	5.0079	1	-1.71074
0	--	0	--		0	--	0	--		0	--	0.91577	-21.3041		0.21857	6.77607	0.21856	1.26393		0	--	0	--
0	-0.59038	0	-21.6652		0	-1.81779	0	-21.5182		0	-1.70395	0.95789	-21.3044		0.27324	6.93721	0.27318	0.92202		0	5.142	0	-1.71037
0.04312	-0.5603	0.04423	-21.6652		0.04098	-1.79315	0.04073	-21.518		0.04117	-1.70886	1	-21.304		0.32791	7.06727	0.32781	0.83203		0.04098	5.00886	0.04098	-1.64696
0.08624	-0.83769	0.08846	-21.6652		0.08195	-1.97046	0.08147	-21.5178		0.08235	-1.91782	0	--		0.38582	6.9535	0.38575	0.91351		0.08196	5.05603	0.08195	-1.59814
0.12936	-0.71594	0.13269	-21.6653		0.12293	-2.03442	0.1222	-21.5179		0.12352	-1.96388	0	-21.3036		0.44373	6.76807	0.4437	1.11136		0.12294	5.32476	0.12293	-1.59792
0.17972	-0.89119	0.18222	-21.6655		0.1639	-2.21391	0.16293	-21.5179		0.1647	-2.13652	0.04211	-21.3033		0.50164	6.59167	0.50164	1.3543		0.16392	5.02484	0.1639	-1.6368
0.23009	-0.99444	0.23176	-21.6661		0.20488	-1.96888	0.20419	-21.5179		0.20544	-1.79325	0.08423	-21.3033		0.55955	6.79171	0.55959	0.93367		0.2049	4.8935	0.20488	-1.85477
0.28045	-0.80825	0.28129	-21.6669		0.24586	-2.06366	0.24546	-21.5175		0.24617	-1.93914	0.12634	-21.3038		0.61098	6.59207	0.61105	1.31361		0.24588	5.09689	0.24585	-1.43147
0.33082	-0.6922	0.33083	-21.6666		0.28683	-1.84129	0.28672	-21.517		0.28691	-1.74434	0.16845	-21.3034		0.6624	6.76318	0.6625	1.11664		0.28686	5.29622	0.28683	-1.09496
0.3787	-0.77056	0.37852	-21.6668		0.32781	-1.69911	0.32798	-21.5165		0.32765	-1.60136	0.22124	-21.3033		0.71382	6.80758	0.71396	0.97615		0.32784	5.52863	0.3278	-1.02885
0.42658	-0.90218	0.42621	-21.6663		0.37417	-1.92307	0.37437	-21.5169		0.37398	-1.8279	0.27403	-21.3032		0.77496	6.7507	0.77501	1.16945		0.37419	5.49248	0.37416	-1.10604
0.47447	-0.74486	0.47391	-21.6658		0.42053	-2.12131	0.42077	-21.5173		0.42032	-2.03654	0.32682	-21.303		0.8361	6.82366	0.83607	1.29237		0.42053	5.38255	0.42052	-1.19769
0.52235	-0.63875	0.5216	-21.6654		0.46688	-1.98528	0.46716	-21.5175		0.46666	-1.89006	0.37306	-21.3034		0.89074	6.67536	0.89071	1.09805		0.46688	5.25918	0.46688	-1.2588
0.57023	-0.59038	0.56929	-21.6652		0.51324	-1.8614	0.51355	-21.5178		0.51299	-1.77723	0.4193	-21.3038		0.94537	6.72168	0.94536	1.02945		0.51323	5.29444	0.51324	-1.7209
0.62338	-0.66045	0.62223	-21.6654		0.5596	-1.81779	0.55994	-21.5182		0.55933	-1.70395	0.46554	-21.3035		1	6.79171	1	0.93367		0.55958	5.142	0.5596	-1.71037
0.67654	-0.83539	0.67517	-21.6659		0.61106	-1.89957	0.61144	-21.5178		0.61076	-1.82844	0.51178	-21.3034		0	--	0	--		0.61103	5.32284	0.61106	-1.70479
0.72969	-0.8535	0.72811	-21.6665		0.66252	-1.95386	0.66293	-21.5174		0.6622	-1.8573	0.55802	-21.3036		0	6.82954	0	0.93552		0.66247	5.31899	0.66252	-1.32841
0.77667	-0.8336	0.77451	-21.6659		0.71398	-2.14223	0.71443	-21.5171		0.71363	-2.04783	0.60935	-21.3033		0.05463	6.75288	0.05464	1.42433		0.71392	5.40711	0.71398	-1.03394
0.82366	-0.84527	0.82091	-21.6654		0.75468	-2.00066	0.75531	-21.5176		0.75419	-1.90256	0.66068	-21.3035		0.10926	6.68628	0.10929	1.17623		0.75464	5.28954	0.75469	-1.18169
0.87064	-0.71594	0.86731	-21.6653		0.79539	-2.0005	0.79619	-21.5179		0.79475	-1.85872	0.71201	-21.3037		0.1639	6.82369	0.16393	1.29237		0.79536	5.15915	0.79539	-1.6574
0.91376	-0.83769	0.91154	-21.6652		0.8361	-2.21391	0.83707	-21.5179		0.8353	-2.13652	0.75185	-21.3036		0.21857	6.77684	0.21856	1.26439		0.83608	5.02484	0.8361	-1.6368
0.95688	-0.5603	0.95577	-21.6652		0.87707	-2.03442	0.8778	-21.5179		0.87648	-1.96388	0.7917	-21.3035		0.27324	6.93731	0.27318	0.92286		0.87706	5.32476	0.87707	-1.59792
1	-0.59038	1	-21.6652		0.91805	-1.97046	0.91853	-21.5178		0.91765	-1.91782	0.83155	-21.3034		0.32791	7.06728	0.32781	0.83203		0.91804	5.05603	0.91805	-1.59814
0	--	0	--		0.95902	-1.79315	0.95927	-21.518		0.95883	-1.70886	0.87366	-21.3038		0.38582	6.96058	0.38575	1.01446		0.95902	5.00886	0.95902	-1.64696
0	-0.53958	0	-21.665		1	-1.81779	1	-21.5182		1	-1.70395	0.91577	-21.3033		0.44373	6.77417	0.4437	1.2271		1	5.142	1	-1.71037
0.04312	-0.43399	0.04423	-21.665		0	--	0	--		0	--	0.95789	-21.3033		0.50164	6.59705	0.50164	1.35697		0	--	0	--
0.08624	-0.70214	0.08846	-21.665		0	-1.81768	0	-21.518		0	-1.70156	1	-21.3036		0.55955	6.82954	0.55959	0.93552		0	5.16013	0	-1.05358
0.12936	-0.59367	0.13269	-21.665		0.04098	-1.72559	0.04073	-21.518		0.04117	-1.67658	0	--		0.61098	6.62852	0.61105	1.31963		0.04098	5.38059	0.04098	-1.44646
0.17972	-0.56811	0.18222	-21.6651		0.08195	-1.91527	0.08147	-21.5174		0.08235	-1.77623	0	-21.3033		0.6624	6.79127	0.6625	1.14661		0.08196	5.68797	0.08195	-1.52173
0.23009	-0.56871	0.23176	-21.6654		0.12293	-1.88842	0.1222	-21.5173		0.12352	-1.73966	0.04211	-21.3032		0.71382	6.85071	0.71396	1.15948		0.12294	5.33043	0.12293	-1.53444
0.28045	-0.59815	0.28129	-21.666		0.1639	-1.72025	0.16293	-21.5179		0.1647	-1.5543	0.08423	-21.3031		0.77496	6.76588	0.77501	1.25737		0.16392	5.04732	0.1639	-1.34917
0.33082	-0.6734	0.33083	-21.6666		0.20488	-1.85981	0.20419	-21.5176		0.20544	-1.78119	0.12634	-21.3031		0.8361	6.82369	0.83607	1.29237		0.2049	5.28909	0.20488	-1.17547
0.3787	-0.66907	0.37852	-21.6662		0.24586	-2.03704	0.24546	-21.5172		0.24617	-1.856	0.16845	-21.3034		0.89074	6.68628	0.89071	1.17623		0.24588	5.55475	0.24585	-1.05843
0.42658	-0.68773	0.42621	-21.6658		0.28683	-1.81224	0.28672	-21.5168		0.28691	-1.64134	0.22124	-21.3033		0.94537	6.75288	0.94536	1.42433		0.28686	5.68994	0.28683	-1.07156
0.47447	-0.71939	0.47391	-21.6654		0.32781	-1.69908	0.32798	-21.5164		0.32765	-1.60135	0.27403	-21.3032		1	6.82954	1	0.93552		0.32784	5.58254	0.3278	-0.98993
0.52235	-0.38984	0.5216	-21.6651		0.37417	-1.73585	0.37437	-21.5168		0.37398	-1.63815	0.32682	-21.303		0	--	0	--		0.37419	5.5408	0.37416	-1.07835
0.57023	-0.53958	0.56929	-21.665		0.42053	-1.84054	0.42077	-21.5172		0.42032	-1.74273	0.37306	-21.3032		0	6.84446	0	1.43101		0.42053	5.38467	0.42052	-1.15241
0.62338	-0.38651	0.62223	-21.6652		0.46688	-1.98528	0.46716	-21.5171		0.46666	-1.87993	0.4193	-21.3033		0.05463	6.75606	0.05464	1.44991		0.46688	5.42888	0.46688	-1.20245
0.67654	-0.71335	0.67517	-21.6655		0.51324	-1.84281	0.51355	-21.5178		0.51299	-1.76175	0.46554	-21.3033		0.10926	6.69342	0.10929	1.23568		0.51323	5.30543	0.51324	-1.13572
0.72969	-0.67842	0.72811	-21.6659		0.5596	-1.81768	0.55994	-21.518		0.55933	-1.70156	0.51178	-21.3033		0.1639	6.98563	0.16393	1.30501		0.55958	5.16013	0.5596	-1.05358
0.77667	-0.69077	0.77451	-21.6654		0.61106	-1.88133	0.61144	-21.5176		0.61076	-1.77347	0.55802	-21.3033		0.21857	7.01579	0.21856	1.33517		0.61103	5.33419	0.61106	-1.12659
0.82366	-0.69832	0.82091	-21.6651		0.66252	-1.95385	0.66293	-21.517		0.6622	-1.8488	0.60935	-21.3033		0.27324	7.19541	0.27318	1.66798		0.66247	5.41616	0.66252	-1.27874
0.87064	-0.59367	0.86731	-21.665		0.71398	-1.7994	0.71443	-21.5171		0.71363	-1.70157	0.66068	-21.3033		0.32791	7.33184	0.32781	1.761		0.71392	5.42076	0.71398	-1.0094
0.91376	-0.70214	0.91154	-21.665		0.75468	-1.92192	0.75531	-21.5175		0.75419	-1.84178	0.71201	-21.3032		0.38582	6.97352	0.38575	1.3917		0.75464	5.51331	0.75469	-1.1348
0.95688	-0.43399	0.95577	-21.665		0.79539	-1.83721	0.79619	-21.5178		0.79475	-1.76967	0.75185	-21.303		0.44373	6.81004	0.4437	1.2538		0.79536	5.20671	0.79539	-1.33691
1	-0.53958	1	-21.665		0.8361	-1.72025	0.83707	-21.5179		0.8353	-1.5543	0.7917	-21.3032		0.50164	6.85601	0.50164	1.37027		0.83608	5.04732	0.8361	-1.34917
0	--	0	--		0.87707	-1.88842	0.8778	-21.5173		0.87648	-1.73966	0.83155	-21.3034		0.55955	6.84446	0.55959	1.43101		0.87706	5.33043	0.87707	-1.53444
0	-0.41255	0	-21.665		0.91805	-1.91527	0.91853	-21.5174		0.91765	-1.77623	0.87366	-21.3031		0.61098	6.85011	0.61105	1.41703		0.91804	5.68797	0.91805	-1.52173
0.04312	-0.33193	0.04423	-21.665		0.95902	-1.72559	0.95927	-21.518		0.95883	-1.67658	0.91577	-21.3031		0.6624	6.85822	0.6625	1.414		0.95902	5.38059	0.95902	-1.44646
0.08624	-0.62077	0.08846	-21.665		1	-1.81768	1	-21.518		1	-1.70156	0.95789	-21.3032		0.71382	6.87675	0.71396	1.24472		1	5.16013	1	-1.05358
0.12936	-0.59365	0.13269	-21.665		0	--	0	--		0	--	1	-21.3033		0.77496	6.90559	0.77501	1.39234		0	--	0	--
0.17972	-0.56811	0.18222	-21.6651		0	-1.41685	0	-21.5176		0	-1.39965	0	--		0.8361	6.98563	0.83607	1.30501		0	5.81558	0	-1.00082
0.23009	-0.5687	0.23176	-21.6654		0.04098	-1.72549	0.04073	-21.5177		0.04117	-1.67616	0	-21.3022		0.89074	6.69342	0.89071	1.23568		0.04098	5.82858	0.04098	-0.85909
0.28045	-0.59813	0.28129	-21.666		0.08195	-1.91519	0.08147	-21.5167		0.08235	-1.77607	0.04211	-21.3026		0.94537	6.75606	0.94536	1.44991		0.08196	5.73629	0.08195	-1.12014
0.33082	-0.67339	0.33083	-21.6665		0.12293	-1.88838	0.1222	-21.5172		0.12352	-1.73957	0.08423	-21.303		1	6.84446	1	1.43101		0.12294	5.54604	0.12293	-1.52122
0.3787	-0.52906	0.37852	-21.6661		0.1639	-1.72025	0.16293	-21.5178		0.1647	-1.55429	0.12634	-21.3028		0	--	0	--		0.16392	5.0527	0.1639	-1.3262
0.42658	-0.42238	0.42621	-21.6657		0.20488	-1.85979	0.20419	-21.5175		0.20544	-1.78119	0.16845	-21.3026		0	6.98912	0	1.4844		0.2049	5.29497	0.20488	-1.15995
0.47447	-0.37732	0.47391	-21.6654		0.24586	-2.03701	0.24546	-21.5171		0.24617	-1.85599	0.22124	-21.3026		0.05463	6.95868	0.05464	1.50936		0.24588	5.56172	0.24585	-1.03984
0.52235	-0.32643	0.5216	-21.6651		0.28683	-1.81216	0.28672	-21.5167		0.28691	-1.64132	0.27403	-21.3028		0.10926	6.70081	0.10929	1.50799		0.28686	5.696	0.28683	-1.06547
0.57023	-0.41255	0.56929	-21.665		0.32781	-1.69908	0.32798	-21.5164		0.32765	-1.60133	0.32682	-21.303		0.1639	6.98565	0.16393	1.30501		0.32784	5.58323	0.3278	-0.9776
0.62338	-0.32334	0.62223	-21.6651		0.37417	-1.73584	0.37437	-21.5166		0.37398	-1.63677	0.37306	-21.3029		0.21857	7.03122	0.21856	1.33782		0.37419	5.84572	0.37416	-1.06798
0.67654	-0.38184	0.67517	-21.6654		0.42053	-1.84053	0.42077	-21.5166		0.42032	-1.73832	0.4193	-21.3027		0.27324	7.20018	0.27318	1.66869		0.42053	5.80334	0.42052	-0.99121
0.72969	-0.45093	0.72811	-21.6658		0.46688	-1.72943	0.46716	-21.5166		0.46666	-1.69145	0.46554	-21.3027		0.32791	7.33184	0.32781	1.76101		0.46688	5.44647	0.46688	-1.15762
0.77667	-0.62528	0.77451	-21.6654		0.51324	-1.8428	0.51355	-21.5176		0.51299	-1.72529	0.51178	-21.3024		0.38582	6.97495	0.38575	1.72684		0.51323	5.83374	0.51324	-1.09602
0.82366	-0.60668	0.82091	-21.665		0.5596	-1.41685	0.55994	-21.5176		0.55933	-1.39965	0.55802	-21.3022		0.44373	6.81006	0.4437	1.49634		0.55958	5.81558	0.5596	-1.00082
0.87064	-0.59365	0.86731	-21.665		0.61106	-1.85202	0.61144	-21.5176		0.61076	-1.7157	0.60935	-21.3025		0.50164	6.97395	0.50164	1.37615		0.61103	5.8373	0.61106	-1.08808
0.91376	-0.62077	0.91154	-21.665		0.66252	-1.79764	0.66293	-21.5169		0.6622	-1.77008	0.66068	-21.3027		0.55955	6.98912	0.55959	1.4844		0.66247	5.43311	0.66252	-1.1368
0.95688	-0.33193	0.95577	-21.665		0.71398	-1.7994	0.71443	-21.5165		0.71363	-1.69839	0.71201	-21.3028		0.61098	6.94934	0.61105	1.41914		0.71392	5.98004	0.71398	-1.00263
1	-0.41255	1	-21.665		0.75468	-1.76373	0.75531	-21.5168		0.75419	-1.6903	0.75185	-21.3029		0.6624	6.8586	0.6625	1.47057		0.75464	5.80539	0.75469	-1.09117
0	--	0	--		0.79539	-1.80305	0.79619	-21.5174		0.79475	-1.66699	0.7917	-21.3027		0.71382	6.87895	0.71396	1.56663		0.79536	5.41428	0.79539	-1.27398
0	-6.34025e-05	0	-21.6649		0.8361	-1.72025	0.83707	-21.5178		0.8353	-1.55429	0.83155	-21.3026		0.77496	6.96511	0.77501	1.40545		0.83608	5.0527	0.8361	-1.3262
0.04312	-0.33187	0.04423	-21.6649		0.87707	-1.88838	0.8778	-21.5172		0.87648	-1.73957	0.87366	-21.3028		0.8361	6.98565	0.83607	1.30501		0.87706	5.54604	0.87707	-1.52122
0.08624	-0.49685	0.08846	-21.6649		0.91805	-1.91519	0.91853	-21.5167		0.91765	-1.77607	0.91577	-21.303		0.89074	6.70081	0.89071	1.50799		0.91804	5.73629	0.91805	-1.12014
0.12936	-0.58476	0.13269	-21.6649		0.95902	-1.72549	0.95927	-21.5177		0.95883	-1.67616	0.95789	-21.3026		0.94537	6.95868	0.94536	1.50936		0.95902	5.82858	0.95902	-0.85909
0.17972	-0.56413	0.18222	-21.6651		1	-1.41685	1	-21.5176		1	-1.39965	1	-21.3022		1	6.98912	1	1.4844		1	5.81558	1	-1.00082
0.23009	-0.54578	0.23176	-21.6654		0	--	0	--		0	--	0	--		0	--	0	--		0	--	0	--
0.28045	-0.58322	0.28129	-21.666		0	-1.41684	0	-21.5154		0	-1.39892	0	-21.3018		0	7.11467	0	1.74691		0	6.20772	0	-1.00052
0.33082	-0.67338	0.33083	-21.6665		0.04098	-1.70545	0.04073	-21.5159		0.04117	-1.648	0.04211	-21.3018		0.05463	7.02244	0.05464	1.53041		0.04098	6.10843	0.04098	-0.85521
0.3787	-0.47527	0.37852	-21.6661		0.08195	-1.72108	0.08147	-21.5165		0.08235	-1.6468	0.08423	-21.3021		0.10926	6.85732	0.10929	1.54439		0.08196	5.74339	0.08195	-1.11774
0.42658	-0.29568	0.42621	-21.6656		0.12293	-1.60733	0.1222	-21.5165		0.12352	-1.54186	0.12634	-21.3023		0.1639	7.06142	0.16393	1.75343		0.12294	5.59687	0.12293	-1.26182
0.47447	-0.14532	0.47391	-21.6652		0.1639	-1.7202	0.16293	-21.5158		0.1647	-1.55415	0.16845	-21.3026		0.21857	7.08251	0.21856	1.60587		0.16392	5.83847	0.1639	-1.27953
0.52235	-0.27296	0.5216	-21.665		0.20488	-1.72157	0.20419	-21.5159		0.20544	-1.64834	0.22124	-21.3026		0.27324	7.32308	0.27318	1.85526		0.2049	5.78191	0.20488	-1.12138
0.57023	-6.34025e-05	0.56929	-21.6649		0.24586	-1.63358	0.24546	-21.516		0.24617	-1.54918	0.27403	-21.3028		0.32791	7.35093	0.32781	1.76185		0.24588	5.8055	0.24585	-1.02471
0.62338	-0.29464	0.62223	-21.665		0.28683	-1.62019	0.28672	-21.5162		0.28691	-1.52388	0.32682	-21.303		0.38582	7.20219	0.38575	1.74653		0.28686	6.11047	0.28683	-1.06427
0.67654	-0.17524	0.67517	-21.6653		0.32781	-1.32506	0.32798	-21.5164		0.32765	-1.20445	0.37306	-21.3026		0.44373	6.9639	0.4437	1.57664		0.32784	6.45475	0.3278	-0.97702
0.72969	-0.35225	0.72811	-21.6658		0.37417	-1.57569	0.37437	-21.5164		0.37398	-1.48239	0.4193	-21.3023		0.50164	7.07376	0.50164	1.44125		0.37419	6.17943	0.37416	-0.99385
0.77667	-0.46984	0.77451	-21.6653		0.42053	-1.75313	0.42077	-21.5164		0.42032	-1.6712	0.46554	-21.302		0.55955	7.11467	0.55959	1.74691		0.42053	5.94853	0.42052	-0.96382
0.82366	-0.53189	0.82091	-21.665		0.46688	-1.71703	0.46716	-21.5164		0.46666	-1.66252	0.51178	-21.3018		0.61098	7.10733	0.61105	1.44171		0.46688	5.90112	0.46688	-1.01871
0.87064	-0.58476	0.86731	-21.6649		0.51324	-1.59871	0.51355	-21.5158		0.51299	-1.48675	0.55802	-21.3018		0.6624	6.92878	0.6625	1.67091		0.51323	5.90482	0.51324	-0.82132
0.91376	-0.49685	0.91154	-21.6649		0.5596	-1.41684	0.55994	-21.5154		0.55933	-1.39892	0.60935	-21.3018		0.71382	7.11041	0.71396	1.63227		0.55958	6.20772	0.5596	-1.00052
0.95688	-0.33187	0.95577	-21.6649		0.61106	-1.55233	0.61144	-21.5159		0.61076	-1.44231	0.66068	-21.3021		0.77496	6.98353	0.77501	1.43848		0.61103	5.83823	0.61106	-0.82569
1	-6.34025e-05	1	-21.6649		0.66252	-1.79762	0.66293	-21.5161		0.6622	-1.73652	0.71201	-21.3024		0.8361	7.06142	0.83607	1.75343		0.66247	5.92527	0.66252	-0.99081
0	--	0	--		0.71398	-1.63476	0.71443	-21.5165		0.71363	-1.5516	0.75185	-21.3024		0.89074	6.85732	0.89071	1.54439		0.71392	5.98789	0.71398	-0.97013
0	0	0	-21.6649		0.75468	-1.71915	0.75531	-21.5164		0.75419	-1.62544	0.7917	-21.3025		0.94537	7.02244	0.94536	1.53041		0.75464	5.82975	0.75469	-1.03132
0.04312	-0.18451	0.04423	-21.6649		0.79539	-1.74334	0.79619	-21.5161		0.79475	-1.60804	0.83155	-21.3026		1	7.11467	1	1.74691		0.79536	5.75798	0.79539	-1.06159
0.08624	-0.17103	0.08846	-21.6649		0.8361	-1.7202	0.83707	-21.5158		0.8353	-1.55415	0.87366	-21.3023		0	--	0	--		0.83608	5.83847	0.8361	-1.27953
0.12936	-0.58475	0.13269	-21.6649		0.87707	-1.60733	0.8778	-21.5165		0.87648	-1.54186	0.91577	-21.3021		0	7.12211	0	1.75492		0.87706	5.59687	0.87707	-1.26182
0.17972	-0.56411	0.18222	-21.665		0.91805	-1.72108	0.91853	-21.5165		0.91765	-1.6468	0.95789	-21.3018		0.05463	7.02636	0.05464	1.56747		0.91804	5.74339	0.91805	-1.11774
0.23009	-0.54576	0.23176	-21.6654		0.95902	-1.70545	0.95927	-21.5159		0.95883	-1.648	1	-21.3018		0.10926	6.9906	0.10929	1.7686		0.95902	6.10843	0.95902	-0.85521
0.28045	-0.5832	0.28129	-21.666		1	-1.41684	1	-21.5154		1	-1.39892	0	--		0.1639	7.06142	0.16393	1.75344		1	6.20772	1	-1.00052
0.33082	-0.67338	0.33083	-21.6665		0	--	0	--		0	--	0	-21.3016		0.21857	7.08572	0.21856	1.60604		0	--	0	--
0.3787	-0.32877	0.37852	-21.6661		0	-1.41672	0	-21.5153		0	-1.37458	0.04211	-21.3015		0.27324	7.33624	0.27318	1.85715		0	6.21042	0	-0.94958
0.42658	-0.08512	0.42621	-21.6655		0.04098	-1.68061	0.04073	-21.5158		0.04117	-1.57215	0.08423	-21.3014		0.32791	7.35094	0.32781	1.76188		0.04098	6.11621	0.04098	-0.81525
0.47447	-0.08347	0.47391	-21.6651		0.08195	-1.43127	0.08147	-21.5164		0.08235	-1.31487	0.12634	-21.3011		0.38582	7.33712	0.38575	1.86619		0.08196	5.85605	0.08195	-0.84854
0.52235	-0.03947	0.5216	-21.6649		0.12293	-1.31935	0.1222	-21.5152		0.12352	-1.28179	0.16845	-21.301		0.44373	6.98364	0.4437	1.77614		0.12294	5.81782	0.12293	-1.03128
0.57023	0	0.56929	-21.6649		0.1639	-1.7202	0.16293	-21.5158		0.1647	-1.55414	0.22124	-21.3009		0.50164	7.07458	0.50164	1.62866		0.16392	5.84465	0.1639	-1.25076
0.62338	-0.04828	0.62223	-21.6649		0.20488	-1.72153	0.20419	-21.5158		0.20544	-1.64832	0.27403	-21.3008		0.55955	7.12211	0.55959	1.75492		0.2049	5.7913	0.20488	-1.10044
0.67654	-0.05707	0.67517	-21.6652		0.24586	-1.63356	0.24546	-21.516		0.24617	-1.54916	0.32682	-21.3007		0.61098	7.10816	0.61105	1.63174		0.24588	5.81608	0.24585	-1.0081
0.72969	-0.14708	0.72811	-21.6657		0.28683	-1.62016	0.28672	-21.5162		0.28691	-1.52386	0.37306	-21.3008		0.6624	7.00836	0.6625	1.74445		0.28686	6.11782	0.28683	-1.05352
0.77667	-0.27295	0.77451	-21.6653		0.32781	-1.32505	0.32798	-21.5164		0.32765	-1.20443	0.4193	-21.301		0.71382	7.19669	0.71396	1.85126		0.32784	6.45728	0.3278	-0.96068
0.82366	-0.42267	0.82091	-21.665		0.37417	-1.27556	0.37437	-21.5161		0.37398	-1.17505	0.46554	-21.3013		0.77496	6.99216	0.77501	1.58522		0.37419	6.23775	0.37416	-0.94242
0.87064	-0.58475	0.86731	-21.6649		0.42053	-1.43437	0.42077	-21.5155		0.42032	-1.29611	0.51178	-21.3015		0.8361	7.06142	0.83607	1.75344		0.42053	6.03873	0.42052	-0.90706
0.91376	-0.17103	0.91154	-21.6649		0.46688	-1.71701	0.46716	-21.5161		0.46666	-1.59056	0.55802	-21.3016		0.89074	6.9906	0.89071	1.7686		0.46688	6.18656	0.46688	-0.9901
0.95688	-0.18451	0.95577	-21.6649		0.51324	-1.44759	0.51355	-21.5157		0.51299	-1.41922	0.60935	-21.3015		0.94537	7.02636	0.94536	1.56747		0.51323	6.24182	0.51324	-0.81734
1	0	1	-21.6649		0.5596	-1.41672	0.55994	-21.5153		0.55933	-1.37458	0.66068	-21.3012		1	7.12211	1	1.75492		0.55958	6.21042	0.5596	-0.94958
0	--	0	--		0.61106	-1.46866	0.61144	-21.5157		0.61076	-1.43803	0.71201	-21.3009		0	--	0	--		0.61103	6.24913	0.61106	-0.82082
0	1.30119	0	-11.9413		0.66252	-1.68274	0.66293	-21.516		0.6622	-1.54322	0.75185	-21.301		0	7.16463	0	1.79781		0.66247	6.10586	0.66252	-0.96501
0.04312	1.33137	0.04423	-11.9253		0.71398	-1.28012	0.71443	-21.5157		0.71363	-1.1462	0.7917	-21.301		0.05463	7.15582	0.05464	1.64256		0.71392	6.02805	0.71398	-0.92876
0.08624	1.38208	0.08846	-11.8778		0.75468	-1.67365	0.75531	-21.5155		0.75419	-1.46075	0.83155	-21.301		0.10926	7.12384	0.10929	1.78572		0.75464	5.89886	0.75469	-1.01313
0.12936	1.42202	0.13269	-11.8005		0.79539	-1.60771	0.79619	-21.5156		0.79475	-1.54374	0.87366	-21.3011		0.1639	7.28759	0.16393	1.90678		0.79536	5.83996	0.79539	-1.00658
0.17972	1.64288	0.18222	-11.7802		0.8361	-1.7202	0.83707	-21.5158		0.8353	-1.55414	0.91577	-21.3014		0.21857	7.26645	0.21856	1.71649		0.83608	5.84465	0.8361	-1.25076
0.23009	1.60729	0.23176	-11.7205		0.87707	-1.31935	0.8778	-21.5152		0.87648	-1.28179	0.95789	-21.3015		0.27324	7.33721	0.27318	1.86754		0.87706	5.81782	0.87707	-1.03128
0.28045	1.56725	0.28129	-11.6244		0.91805	-1.43127	0.91853	-21.5164		0.91765	-1.31487	1	-21.3016		0.32791	7.50402	0.32781	1.96707		0.91804	5.85605	0.91805	-0.84854
0.33082	1.71028	0.33083	-11.4977		0.95902	-1.68061	0.95927	-21.5158		0.95883	-1.57215	0	--		0.38582	7.34781	0.38575	2.02567		0.95902	6.11621	0.95902	-0.81525
0.3787	1.55264	0.37852	-11.6482		1	-1.41672	1	-21.5153		1	-1.37458	0	-21.3016		0.44373	7.01623	0.4437	1.84396		1	6.21042	1	-0.94958
0.42658	1.4338	0.42621	-11.7727		0	--	0	--		0	--	0.04211	-21.3015		0.50164	7.21937	0.50164	1.66674		0	--	0	--
0.47447	1.29964	0.47391	-11.8653		0	-1.4167	0	-21.5152		0	-1.37407	0.08423	-21.3011		0.55955	7.16463	0.55959	1.79781		0	6.29994	0	-0.80336
0.52235	1.35469	0.5216	-11.9222		0.04098	-1.24601	0.04073	-21.5149		0.04117	-1.23554	0.12634	-21.3009		0.61098	7.20764	0.61105	1.65264		0.04098	6.26326	0.04098	-0.81468
0.57023	1.30119	0.56929	-11.9413		0.08195	-1.22267	0.08147	-21.5147		0.08235	-1.20301	0.16845	-21.301		0.6624	7.01967	0.6625	1.74881		0.08196	6.31064	0.08195	-0.8455
0.62338	1.36656	0.62223	-11.9177		0.12293	-1.31921	0.1222	-21.515		0.12352	-1.14727	0.22124	-21.3009		0.71382	7.24644	0.71396	2.0339		0.12294	5.86271	0.12293	-0.96802
0.67654	1.29616	0.67517	-11.8479		0.1639	-1.46463	0.16293	-21.5142		0.1647	-1.41097	0.27403	-21.3008		0.77496	7.19577	0.77501	1.5976		0.16392	6.02128	0.1639	-0.91689
0.72969	1.5215	0.72811	-11.7349		0.20488	-1.40257	0.20419	-21.5146		0.20544	-1.25293	0.32682	-21.3007		0.8361	7.28759	0.83607	1.90678		0.2049	5.94016	0.20488	-0.96615
0.77667	1.6113	0.77451	-11.7911		0.24586	-1.0358	0.24546	-21.5152		0.24617	-0.90376	0.37306	-21.3008		0.89074	7.12384	0.89071	1.78572		0.24588	6.1083	0.24585	-0.86762
0.82366	1.58071	0.82091	-11.8134		0.28683	-0.79298	0.28672	-21.5158		0.28691	-0.71615	0.4193	-21.3009		0.94537	7.15582	0.94536	1.64256		0.28686	6.36295	0.28683	-1.0259
0.87064	1.42202	0.86731	-11.8005		0.32781	-1.32495	0.32798	-21.5164		0.32765	-1.20441	0.46554	-21.3012		1	7.16463	1	1.79781		0.32784	6.4666	0.3278	-0.9417
0.91376	1.38208	0.91154	-11.8778		0.37417	-1.27555	0.37437	-21.5159		0.37398	-1.12988	0.51178	-21.3015		0	--	0	--		0.37419	6.25915	0.37416	-0.93927
0.95688	1.33137	0.95577	-11.9253		0.42053	-1.10624	0.42077	-21.5154		0.42032	-1.02183	0.55802	-21.3016		0	7.17444	0	1.80557		0.42053	6.03883	0.42052	-0.89153
1	1.30119	1	-11.9413		0.46688	-1.09896	0.46716	-21.5151		0.46666	-0.99094	0.60935	-21.3015		0.05463	7.29144	0.05464	1.72909		0.46688	6.19457	0.46688	-0.8822
0	--	0	--		0.51324	-1.44758	0.51355	-21.515		0.51299	-1.41571	0.66068	-21.3011		0.10926	7.25688	0.10929	1.83113		0.51323	6.27853	0.51324	-0.75312
0	1.30123	0	-11.7665		0.5596	-1.4167	0.55994	-21.5152		0.55933	-1.37407	0.71201	-21.3009		0.1639	7.28759	0.16393	1.90678		0.55958	6.29994	0.5596	-0.80336
0.04312	1.37096	0.04423	-11.7522		0.61106	-1.46864	0.61144	-21.515		0.61076	-1.4378	0.75185	-21.3009		0.21857	7.27368	0.21856	1.71691		0.61103	6.27147	0.61106	-0.77208
0.08624	1.44325	0.08846	-11.7099		0.66252	-1.10237	0.66293	-21.5151		0.6622	-0.97539	0.7917	-21.3009		0.27324	7.34984	0.27318	1.86796		0.66247	6.15862	0.66252	-0.90239
0.12936	1.42203	0.13269	-11.8004		0.71398	-1.17871	0.71443	-21.5155		0.71363	-1.08936	0.83155	-21.301		0.32791	7.50403	0.32781	1.9671		0.71392	6.09861	0.71398	-0.88071
0.17972	1.64289	0.18222	-11.7801		0.75468	-1.42293	0.75531	-21.515		0.75419	-1.28237	0.87366	-21.3009		0.38582	7.38907	0.38575	2.03121		0.75464	5.93661	0.75469	-0.98641
0.23009	1.6073	0.23176	-11.7204		0.79539	-1.57465	0.79619	-21.5145		0.79475	-1.42535	0.91577	-21.3011		0.44373	7.22351	0.4437	1.84934		0.79536	5.94105	0.79539	-0.95867
0.28045	1.56726	0.28129	-11.6243		0.8361	-1.46463	0.83707	-21.5142		0.8353	-1.41097	0.95789	-21.3015		0.50164	7.28071	0.50164	1.85452		0.83608	6.02128	0.8361	-0.91689
0.33082	1.71029	0.33083	-11.4976		0.87707	-1.31921	0.8778	-21.515		0.87648	-1.14727	1	-21.3016		0.55955	7.17444	0.55959	1.80557		0.87706	5.86271	0.87707	-0.96802
0.3787	1.61352	0.37852	-11.5452		0.91805	-1.22267	0.91853	-21.5147		0.91765	-1.20301	0	--		0.61098	7.30992	0.61105	1.85475		0.91804	6.31064	0.91805	-0.8455
0.42658	1.52762	0.42621	-11.6024		0.95902	-1.24601	0.95927	-21.5149		0.95883	-1.23554	0	-21.3013		0.6624	7.16787	0.6625	1.75451		0.95902	6.26326	0.95902	-0.81468
0.47447	1.49174	0.47391	-11.6922		1	-1.4167	1	-21.5152		1	-1.37407	0.04211	-21.3011		0.71382	7.35174	0.71396	2.03819		1	6.29994	1	-0.80336
0.52235	1.49525	0.5216	-11.7477		0	--	0	--		0	--	0.08423	-21.3009		0.77496	7.32685	0.77501	2.00581		0	--	0	--
0.57023	1.30123	0.56929	-11.7665		0	-1.06476	0	-21.5152		0	-0.93486	0.12634	-21.3007		0.8361	7.28759	0.83607	1.90678		0	6.3096	0	-0.80332
0.62338	1.46356	0.62223	-11.7434		0.04098	-1.07322	0.04073	-21.5147		0.04117	-0.9428	0.16845	-21.3005		0.89074	7.25688	0.89071	1.83113		0.04098	6.26596	0.04098	-0.56594
0.67654	1.52557	0.67517	-11.6753		0.08195	-1.10186	0.08147	-21.5146		0.08235	-0.99841	0.22124	-21.3005		0.94537	7.29144	0.94536	1.72909		0.08196	6.31409	0.08195	-0.78778
0.72969	1.55246	0.72811	-11.5659		0.12293	-1.31912	0.1222	-21.5144		0.12352	-1.14703	0.27403	-21.3006		1	7.17444	1	1.80557		0.12294	6.03936	0.12293	-0.90686
0.77667	1.67228	0.77451	-11.6713		0.1639	-1.46463	0.16293	-21.5142		0.1647	-1.41095	0.32682	-21.3006		0	--	0	--		0.16392	6.0267	0.1639	-0.91571
0.82366	1.62187	0.82091	-11.7525		0.20488	-1.40254	0.20419	-21.5145		0.20544	-1.25292	0.37306	-21.3007		0	7.32954	0	1.81054		0.2049	5.94514	0.20488	-0.95398
0.87064	1.42203	0.86731	-11.8004		0.24586	-1.03574	0.24546	-21.5151		0.24617	-0.90374	0.4193	-21.3008		0.05463	7.31661	0.05464	1.76142		0.24588	6.11912	0.24585	-0.86701
0.91376	1.44325	0.91154	-11.7099		0.28683	-0.79285	0.28672	-21.5157		0.28691	-0.71611	0.46554	-21.301		0.10926	7.53528	0.10929	2.04634		0.28686	6.36747	0.28683	-1.0236
0.95688	1.37096	0.95577	-11.7522		0.32781	-1.32494	0.32798	-21.5164		0.32765	-1.20438	0.51178	-21.3011		0.1639	7.42464	0.16393	1.91488		0.32784	6.46838	0.3278	-0.90998
1	1.30123	1	-11.7665		0.37417	-0.88808	0.37437	-21.5159		0.37398	-0.77184	0.55802	-21.3013		0.21857	7.56442	0.21856	2.21224		0.37419	6.32399	0.37416	-0.8901
0	--	0	--		0.42053	-1.10621	0.42077	-21.5153		0.42032	-0.9375	0.60935	-21.3011		0.27324	7.5511	0.27318	2.006		0.42053	6.22439	0.42052	-0.88607
0	1.37015	0	-11.4267		0.46688	-1.08281	0.46716	-21.5149		0.46666	-0.97152	0.66068	-21.3009		0.32791	7.50785	0.32781	1.96814		0.46688	6.33604	0.46688	-0.86757
0.04312	1.63609	0.04423	-11.5692		0.51324	-1.07496	0.51355	-21.5148		0.51299	-0.94583	0.71201	-21.3008		0.38582	7.57884	0.38575	2.08725		0.51323	6.31785	0.51324	-0.70545
0.08624	1.50535	0.08846	-11.6961		0.5596	-1.06476	0.55994	-21.5152		0.55933	-0.93486	0.75185	-21.3007		0.44373	7.39343	0.4437	1.86893		0.55958	6.3096	0.5596	-0.80332
0.12936	2.07412	0.13269	-11.6417		0.61106	-1.07723	0.61144	-21.5148		0.61076	-0.94826	0.7917	-21.3006		0.50164	7.28225	0.50164	1.85461		0.61103	6.34191	0.61106	-0.72679
0.17972	1.79352	0.18222	-11.6214		0.66252	-0.95198	0.66293	-21.515		0.6622	-0.86535	0.83155	-21.3005		0.55955	7.32954	0.55959	1.81054		0.66247	6.36493	0.66252	-0.88493
0.23009	2.14874	0.23176	-11.5616		0.71398	-1.17869	0.71443	-21.5155		0.71363	-1.01356	0.87366	-21.3007		0.61098	7.31149	0.61105	1.8553		0.71392	6.18291	0.71398	-0.87855
0.28045	2.02749	0.28129	-11.4656		0.75468	-1.07455	0.75531	-21.515		0.75419	-0.95082	0.91577	-21.3009		0.6624	7.3434	0.6625	1.8851		0.75464	5.96032	0.75469	-0.97737
0.33082	1.7103	0.33083	-11.4975		0.79539	-1.26806	0.79619	-21.5145		0.79475	-1.11689	0.95789	-21.3011		0.71382	7.54977	0.71396	2.11163		0.79536	5.95006	0.79539	-0.94071
0.3787	1.84419	0.37852	-11.4825		0.8361	-1.46463	0.83707	-21.5142		0.8353	-1.41095	1	-21.3013		0.77496	7.56044	0.77501	2.05374		0.83608	6.0267	0.8361	-0.91571
0.42658	1.60121	0.42621	-11.5623		0.87707	-1.31912	0.8778	-21.5144		0.87648	-1.14703	0	--		0.8361	7.42464	0.83607	1.91488		0.87706	6.03936	0.87707	-0.90686
0.47447	1.62368	0.47391	-11.5477		0.91805	-1.10186	0.91853	-21.5146		0.91765	-0.99841	0	-21.3004		0.89074	7.53528	0.89071	2.04634		0.91804	6.31409	0.91805	-0.78778
0.52235	1.51041	0.5216	-11.5017		0.95902	-1.07322	0.95927	-21.5147		0.95883	-0.9428	0.04211	-21.3004		0.94537	7.31661	0.94536	1.76142		0.95902	6.26596	0.95902	-0.56594
0.57023	1.37015	0.56929	-11.4267		1	-1.06476	1	-21.5152		1	-0.93486	0.08423	-21.3003		1	7.32954	1	1.81054		1	6.3096	1	-0.80332
0.62338	1.54148	0.62223	-11.5082		0	--	0	--		0	--	0.12634	-21.3004		0	--	0	--		0	--	0	--
0.67654	1.59335	0.67517	-11.5536		0	-0.37246	0	-21.5144		0	-0.33879	0.16845	-21.3005		0	7.33245	0	1.98021		0	6.74303	0	-0.0382
0.72969	1.60494	0.72811	-11.5602		0.04098	-0.76625	0.04073	-21.5145		0.04117	-0.70561	0.22124	-21.3005		0.05463	7.32732	0.05464	1.96461		0.04098	6.6122	0.04098	-0.43801
0.77667	1.69522	0.77451	-11.6253		0.08195	-1.08956	0.08147	-21.5144		0.08235	-0.96996	0.27403	-21.3006		0.10926	7.58009	0.10929	2.0703		0.08196	6.37144	0.08195	-0.78671
0.82366	1.80973	0.82091	-11.6509		0.12293	-1.2503	0.1222	-21.5141		0.12352	-1.1262	0.32682	-21.3006		0.1639	7.42465	0.16393	1.91489		0.12294	6.04253	0.12293	-0.90454
0.87064	2.07412	0.86731	-11.6417		0.1639	-1.22856	0.16293	-21.5138		0.1647	-1.09383	0.37306	-21.3006		0.21857	7.57449	0.21856	2.21364		0.16392	6.04496	0.1639	-0.9148
0.91376	1.50535	0.91154	-11.6961		0.20488	-1.15562	0.20419	-21.5136		0.20544	-1.02966	0.4193	-21.3005		0.27324	7.55892	0.27318	2.0073		0.2049	6.25283	0.20488	-0.94488
0.95688	1.63609	0.95577	-11.5692		0.24586	-0.85239	0.24546	-21.5133		0.24617	-0.76261	0.46554	-21.3004		0.32791	7.50786	0.32781	1.96815		0.24588	6.29634	0.24585	-0.83301
1	1.37015	1	-11.4267		0.28683	-0.65009	0.28672	-21.5132		0.28691	-0.54294	0.51178	-21.3004		0.38582	7.57933	0.38575	2.08847		0.28686	6.47209	0.28683	-0.76883
0	--	0	--		0.32781	-0.36747	0.32798	-21.5131		0.32765	-0.29471	0.55802	-21.3004		0.44373	7.60905	0.4437	1.9769		0.32784	6.48277	0.3278	-0.8274
0	1.77207	0	-11.4259		0.37417	-0.63767	0.37437	-21.5139		0.37398	-0.55433	0.60935	-21.3004		0.50164	7.40313	0.50164	1.94688		0.37419	6.38634	0.37416	-0.84404
0.04312	1.66322	0.04423	-11.4434		0.42053	-1.05891	0.42077	-21.515		0.42032	-0.93173	0.66068	-21.3004		0.55955	7.33245	0.55959	1.98021		0.42053	6.45229	0.42052	-0.83471
0.08624	2.06296	0.08846	-11.551		0.46688	-0.75028	0.46716	-21.5147		0.46666	-0.68318	0.71201	-21.3005		0.61098	7.35212	0.61105	1.95393		0.46688	6.36946	0.46688	-0.69782
0.12936	2.07413	0.13269	-11.6416		0.51324	-0.52179	0.51355	-21.5145		0.51299	-0.49208	0.75185	-21.3004		0.6624	7.65694	0.6625	1.93259		0.51323	6.56561	0.51324	-0.39432
0.17972	1.79352	0.18222	-11.6213		0.5596	-0.37246	0.55994	-21.5144		0.55933	-0.33879	0.7917	-21.3005		0.71382	7.55006	0.71396	2.11512		0.55958	6.74303	0.5596	-0.0382
0.23009	2.14875	0.23176	-11.5615		0.61106	-0.51952	0.61144	-21.5145		0.61076	-0.49132	0.83155	-21.3005		0.77496	7.59999	0.77501	2.21153		0.61103	6.52852	0.61106	-0.43558
0.28045	2.0275	0.28129	-11.4655		0.66252	-0.8476	0.66293	-21.5148		0.6622	-0.7757	0.87366	-21.3004		0.8361	7.42465	0.83607	1.91489		0.66247	6.38943	0.66252	-0.74719
0.33082	1.7103	0.33083	-11.4974		0.71398	-0.9716	0.71443	-21.5146		0.71363	-0.85944	0.91577	-21.3003		0.89074	7.58009	0.89071	2.0703		0.71392	6.38571	0.71398	-0.87424
0.3787	1.9316	0.37852	-11.4223		0.75468	-0.73981	0.75531	-21.5144		0.75419	-0.64815	0.95789	-21.3004		0.94537	7.32732	0.94536	1.96461		0.75464	6.19556	0.75469	-0.95806
0.42658	1.88838	0.42621	-11.422		0.79539	-1.16702	0.79619	-21.514		0.79475	-1.03549	1	-21.3004		1	7.33245	1	1.98021		0.79536	5.99403	0.79539	-0.9336
0.47447	1.87437	0.47391	-11.4185		0.8361	-1.22856	0.83707	-21.5138		0.8353	-1.09383	0	--		0	--	0	--		0.83608	6.04496	0.8361	-0.9148
0.52235	1.59151	0.5216	-11.3855		0.87707	-1.2503	0.8778	-21.5141		0.87648	-1.1262	0	-11.9492		0	7.33372	0	2.09916		0.87706	6.04253	0.87707	-0.90454
0.57023	1.77207	0.56929	-11.4259		0.91805	-1.08956	0.91853	-21.5144		0.91765	-0.96996	0.04211	-11.9277		0.05463	7.57913	0.05464	2.15416		0.91804	6.37144	0.91805	-0.78671
0.62338	1.6461	0.62223	-11.3905		0.95902	-0.76625	0.95927	-21.5145		0.95883	-0.70561	0.08423	-11.8638		0.10926	7.65919	0.10929	2.07211		0.95902	6.6122	0.95902	-0.43801
0.67654	1.89375	0.67517	-11.4218		1	-0.37246	1	-21.5144		1	-0.33879	0.12634	-11.7594		0.1639	7.6199	0.16393	2.37023		1	6.74303	1	-0.0382
0.72969	1.94522	0.72811	-11.4166		0	--	0	--		0	--	0.16845	-11.6176		0.21857	7.80549	0.21856	2.34573		0	--	0	--
0.77667	1.99431	0.77451	-11.5214		0	-0.37242	0	-21.5137		0	-0.33798	0.22124	-11.59		0.27324	7.65172	0.27318	2.11102		0	6.7478	0	-0.00361
0.82366	1.83457	0.82091	-11.5978		0.04098	-0.3785	0.04073	-21.5137		0.04117	-0.253	0.27403	-11.5094		0.32791	7.72023	0.32781	2.21073		0.04098	6.69536	0.04098	-0.43619
0.87064	2.07413	0.86731	-11.6416		0.08195	-0.79327	0.08147	-21.5139		0.08235	-0.63099	0.32682	-11.3829		0.38582	7.64805	0.38575	2.12722		0.08196	6.38571	0.08195	-0.6803
0.91376	2.06296	0.91154	-11.551		0.12293	-1.15643	0.1222	-21.514		0.12352	-1.02248	0.37306	-11.5739		0.44373	7.60947	0.4437	1.97951		0.12294	6.22432	0.12293	-0.88509
0.95688	1.66322	0.95577	-11.4434		0.1639	-1.22856	0.16293	-21.5138		0.1647	-1.09382	0.4193	-11.733		0.50164	7.46466	0.50164	1.97958		0.16392	6.05025	0.1639	-0.91162
1	1.77207	1	-11.4259		0.20488	-1.15561	0.20419	-21.5135		0.20544	-1.02965	0.46554	-11.8516		0.55955	7.33372	0.55959	2.09916		0.2049	6.25551	0.20488	-0.93369
0	--	0	--		0.24586	-0.85238	0.24546	-21.5133		0.24617	-0.7626	0.51178	-11.9246		0.61098	7.40712	0.61105	2.05134		0.24588	6.29857	0.24585	-0.82187
0	1.77314	0	-11.3259		0.28683	-0.65001	0.28672	-21.5131		0.28691	-0.54291	0.55802	-11.9492		0.6624	7.65742	0.6625	1.93561		0.28686	6.48501	0.28683	-0.75842
0.04312	1.66332	0.04423	-11.2759		0.32781	-0.36747	0.32798	-21.5131		0.32765	-0.29471	0.60935	-11.9189		0.71382	7.56553	0.71396	2.16546		0.32784	6.48424	0.3278	-0.82468
0.08624	2.06305	0.08846	-11.1288		0.37417	-0.55451	0.37437	-21.5137		0.37398	-0.48382	0.66068	-11.8293		0.77496	7.67757	0.77501	2.21901		0.37419	6.482	0.37416	-0.83935
0.12936	2.07423	0.13269	-11.0045		0.42053	-0.52256	0.42077	-21.5142		0.42032	-0.4577	0.71201	-11.6846		0.8361	7.6199	0.83607	2.37023		0.42053	6.4779	0.42052	-0.83094
0.17972	2.13679	0.18222	-11.0407		0.46688	-0.75024	0.46716	-21.5145		0.46666	-0.56427	0.75185	-11.6949		0.89074	7.65919	0.89071	2.07211		0.46688	6.3869	0.46688	-0.64781
0.23009	2.20208	0.23176	-11.1912		0.51324	-0.52176	0.51355	-21.5141		0.51299	-0.41941	0.7917	-11.6725		0.94537	7.57913	0.94536	2.15416		0.51323	6.5706	0.51324	-0.35553
0.28045	2.31391	0.28129	-11.349		0.5596	-0.37242	0.55994	-21.5137		0.55933	-0.33798	0.83155	-11.6176		1	7.33372	1	2.09916		0.55958	6.7478	0.5596	-0.00361
0.33082	2.44436	0.33083	-11.3398		0.61106	-0.51949	0.61144	-21.5142		0.61076	-0.41767	0.87366	-11.7594		0	--	0	--		0.61103	6.53476	0.61106	-0.39446
0.3787	2.03206	0.37852	-11.3954		0.66252	-0.84757	0.66293	-21.5145		0.6622	-0.66048	0.91577	-11.8638		0	7.33436	0	2.10607		0.66247	6.39584	0.66252	-0.6965
0.42658	2.25426	0.42621	-11.3243		0.71398	-0.4177	0.71443	-21.514		0.71363	-0.36037	0.95789	-11.9277		0.05463	7.5895	0.05464	2.24461		0.71392	6.42676	0.71398	-0.8692
0.47447	1.9252	0.47391	-11.2104		0.75468	-0.71133	0.75531	-21.5138		0.75419	-0.61461	1	-11.9492		0.10926	7.68035	0.10929	2.09967		0.75464	6.34783	0.75469	-0.78222
0.52235	1.81534	0.5216	-11.3253		0.79539	-1.15441	0.79619	-21.5138		0.79475	-1.03507	0	--		0.1639	7.61991	0.16393	2.37023		0.79536	6.22544	0.79539	-0.91726
0.57023	1.77314	0.56929	-11.3259		0.8361	-1.22856	0.83707	-21.5138		0.8353	-1.09382	0	-11.5461		0.21857	7.82246	0.21856	2.34621		0.83608	6.05025	0.8361	-0.91162
0.62338	1.79048	0.62223	-11.3129		0.87707	-1.15643	0.8778	-21.514		0.87648	-1.02248	0.04211	-11.5272		0.27324	7.67036	0.27318	2.11147		0.87706	6.22432	0.87707	-0.88509
0.67654	1.97217	0.67517	-11.2364		0.91805	-0.79327	0.91853	-21.5139		0.91765	-0.63099	0.08423	-11.4714		0.32791	7.72026	0.32781	2.21075		0.91804	6.38571	0.91805	-0.6803
0.72969	2.13933	0.72811	-11.3587		0.95902	-0.3785	0.95927	-21.5137		0.95883	-0.253	0.12634	-11.4436		0.38582	7.71585	0.38575	2.16459		0.95902	6.69536	0.95902	-0.43619
0.77667	2.0718	0.77451	-11.1948		1	-0.37242	1	-21.5137		1	-0.33798	0.16845	-11.6175		0.44373	7.87824	0.4437	1.99784		1	6.7478	1	-0.00361
0.82366	1.8813	0.82091	-11.0414		0	--	0	--		0	--	0.22124	-11.5899		0.50164	7.6687	0.50164	2.09275		0	--	0	--
0.87064	2.07423	0.86731	-11.0045		0	-0.37232	0	-21.5131		0	-0.27203	0.27403	-11.5093		0.55955	7.33436	0.55959	2.10607		0	6.8551	0	-0.000406266
0.91376	2.06305	0.91154	-11.1288		0.04098	-0.37836	0.04073	-21.5132		0.04117	-0.25261	0.32682	-11.3828		0.61098	7.60071	0.61105	2.05159		0.04098	6.69837	0.04098	-0.30708
0.95688	1.66332	0.95577	-11.2759		0.08195	-0.79315	0.08147	-21.5134		0.08235	-0.63068	0.37306	-11.392		0.6624	7.78427	0.6625	1.93783		0.08196	6.38685	0.08195	-0.62474
1	1.77314	1	-11.3259		0.12293	-1.08364	0.1222	-21.5136		0.12352	-0.99055	0.4193	-11.3643		0.71382	7.84796	0.71396	2.18143		0.12294	6.2281	0.12293	-0.87726
0	--	0	--		0.1639	-0.70906	0.16293	-21.5135		0.1647	-0.64075	0.46554	-11.4583		0.77496	7.77566	0.77501	2.33421		0.16392	6.18301	0.1639	-0.89606
0	1.90301	0	-11.3257		0.20488	-0.50014	0.20419	-21.5134		0.20544	-0.45544	0.51178	-11.5238		0.8361	7.61991	0.83607	2.37023		0.2049	6.31441	0.20488	-0.75418
0.04312	2.04141	0.04423	-11.2072		0.24586	-0.4165	0.24546	-21.5132		0.24617	-0.37978	0.55802	-11.5461		0.89074	7.68035	0.89071	2.09967		0.24588	6.4532	0.24585	-0.79068
0.08624	2.07027	0.08846	-11.0972		0.28683	-0.46213	0.28672	-21.5131		0.28691	-0.39961	0.60935	-11.5187		0.94537	7.5895	0.94536	2.24461		0.28686	6.6261	0.28683	-0.71798
0.12936	2.07424	0.13269	-11.0045		0.32781	-0.36738	0.32798	-21.513		0.32765	-0.29469	0.66068	-11.4383		1	7.33436	1	2.10607		0.32784	6.54561	0.3278	-0.82423
0.17972	2.1368	0.18222	-11.0406		0.37417	-0.37453	0.37437	-21.5126		0.37398	-0.318	0.71201	-11.3773		0	--	0	--		0.37419	6.56331	0.37416	-0.74386
0.23009	2.2021	0.23176	-11.1911		0.42053	-0.40231	0.42077	-21.5124		0.42032	-0.36516	0.75185	-11.4179		0	7.56374	0	2.10677		0.42053	6.49051	0.42052	-0.79009
0.28045	2.31392	0.28129	-11.3489		0.46688	-0.46247	0.46716	-21.5125		0.46666	-0.43806	0.7917	-11.5317		0.05463	7.72624	0.05464	2.26658		0.46688	6.45944	0.46688	-0.64485
0.33082	2.44437	0.33083	-11.3397		0.51324	-0.27336	0.51355	-21.5128		0.51299	-0.24637	0.83155	-11.6175		0.10926	7.69045	0.10929	2.35268		0.51323	6.63551	0.51324	-0.35372
0.3787	2.11914	0.37852	-11.3297		0.5596	-0.37232	0.55994	-21.5131		0.55933	-0.27203	0.87366	-11.4436		0.1639	7.92709	0.16393	2.4775		0.55958	6.8551	0.5596	-0.000406266
0.42658	2.33348	0.42621	-11.1575		0.61106	-0.31487	0.61144	-21.5128		0.61076	-0.28235	0.91577	-11.4714		0.21857	7.83147	0.21856	2.35649		0.61103	6.59706	0.61106	-0.39246
0.47447	2.09881	0.47391	-11.2046		0.66252	-0.4466	0.66293	-21.5125		0.6622	-0.42065	0.95789	-11.5272		0.27324	7.78232	0.27318	2.30435		0.66247	6.40597	0.66252	-0.69334
0.52235	1.8402	0.5216	-11.2438		0.71398	-0.38998	0.71443	-21.5124		0.71363	-0.34653	1	-11.5461		0.32791	7.73488	0.32781	2.21077		0.71392	6.55246	0.71398	-0.82372
0.57023	1.90301	0.56929	-11.3257		0.75468	-0.52008	0.75531	-21.5129		0.75419	-0.47924	0	--		0.38582	7.71705	0.38575	2.16882		0.75464	6.46469	0.75469	-0.70489
0.62338	1.86032	0.62223	-11.2337		0.79539	-0.6717	0.79619	-21.5134		0.79475	-0.61121	0	-11.1194		0.44373	7.90099	0.4437	2.36458		0.79536	6.28208	0.79539	-0.88421
0.67654	2.17119	0.67517	-11.1761		0.8361	-0.70906	0.83707	-21.5135		0.8353	-0.64075	0.04211	-11.1038		0.50164	7.67355	0.50164	2.09292		0.83608	6.18301	0.8361	-0.89606
0.72969	2.24142	0.72811	-11.2138		0.87707	-1.08364	0.8778	-21.5136		0.87648	-0.99055	0.08423	-11.2453		0.55955	7.56374	0.55959	2.10677		0.87706	6.2281	0.87707	-0.87726
0.77667	2.32635	0.77451	-11.1102		0.91805	-0.79315	0.91853	-21.5134		0.91765	-0.63068	0.12634	-11.3814		0.61098	7.65202	0.61105	2.05785		0.91804	6.38685	0.91805	-0.62474
0.82366	2.33783	0.82091	-11.0274		0.95902	-0.37836	0.95927	-21.5132		0.95883	-0.25261	0.16845	-11.2626		0.6624	7.84023	0.6625	2.38748		0.95902	6.69837	0.95902	-0.30708
0.87064	2.07424	0.86731	-11.0045		1	-0.37232	1	-21.5131		1	-0.27203	0.22124	-11.2376		0.71382	7.89109	0.71396	2.21391		1	6.8551	1	-0.000406266
0.91376	2.07027	0.91154	-11.0972		0	--	0	--		0	--	0.27403	-11.2233		0.77496	7.85856	0.77501	2.35113		0	--	0	--
0.95688	2.04141	0.95577	-11.2072		0	-0.37228	0	-21.5103		0	-0.2716	0.32682	-11.3827		0.8361	7.92709	0.83607	2.4775		0	6.86712	0	0
1	1.90301	1	-11.3257		0.04098	-0.0014	0.04073	-21.5105		0.04117	-0.0067	0.37306	-11.3347		0.89074	7.69045	0.89071	2.35268		0.04098	6.73505	0.04098	-0.2733
0	--	0	--		0.08195	0	0.08147	-21.5111		0.08235	0	0.4193	-11.3528		0.94537	7.72624	0.94536	2.26658		0.08196	6.53558	0.08195	-0.34315
0	1.90499	0	-10.9752		0.12293	-0.33135	0.1222	-21.5121		0.12352	-0.29115	0.46554	-11.3041		1	7.56374	1	2.10677		0.12294	6.38936	0.12293	-0.54304
0.04312	2.06738	0.04423	-10.968		0.1639	-0.70906	0.16293	-21.5134		0.1647	-0.64074	0.51178	-11.2189		0	--	0	--		0.16392	6.18512	0.1639	-0.89397
0.08624	2.0704	0.08846	-10.9473		0.20488	-0.50011	0.20419	-21.5134		0.20544	-0.45543	0.55802	-11.1194		0	7.59145	0	2.11158		0.2049	6.31528	0.20488	-0.75335
0.12936	2.1115	0.13269	-10.9971		0.24586	-0.4164	0.24546	-21.5132		0.24617	-0.37975	0.60935	-11.2292		0.05463	7.78864	0.05464	2.29341		0.24588	6.45679	0.24585	-0.77303
0.17972	2.37963	0.18222	-10.9927		0.28683	-0.46209	0.28672	-21.5131		0.28691	-0.3996	0.66068	-11.3198		0.10926	7.89486	0.10929	2.35948		0.28686	6.62857	0.28683	-0.70252
0.23009	2.44988	0.23176	-11.0408		0.32781	-0.36738	0.32798	-21.513		0.32765	-0.29468	0.71201	-11.3102		0.1639	7.92711	0.16393	2.4775		0.32784	6.55203	0.3278	-0.82274
0.28045	2.59814	0.28129	-11.1934		0.37417	-0.37452	0.37437	-21.5124		0.37398	-0.29065	0.75185	-11.3233		0.21857	7.83395	0.21856	2.35753		0.37419	6.57358	0.37416	-0.69622
0.33082	2.44438	0.33083	-11.3396		0.42053	-0.4023	0.42077	-21.5116		0.42032	-0.31072	0.7917	-11.3072		0.27324	7.79594	0.27318	2.30532		0.42053	6.70685	0.42052	-0.78061
0.3787	2.51847	0.37852	-11.2575		0.46688	-0.46245	0.46716	-21.5109		0.46666	-0.36509	0.83155	-11.2626		0.32791	7.73489	0.32781	2.21083		0.46688	6.57633	0.46688	-0.59527
0.42658	2.34503	0.42621	-11.154		0.51324	-0.27331	0.51355	-21.5105		0.51299	-0.13263	0.87366	-11.3814		0.38582	7.8502	0.38575	2.23144		0.51323	6.76967	0.51324	-0.31532
0.47447	2.11436	0.47391	-11.146		0.5596	-0.37228	0.55994	-21.5103		0.55933	-0.2716	0.91577	-11.2453		0.44373	8.04507	0.4437	2.43732		0.55958	6.86712	0.5596	0
0.52235	2.08142	0.5216	-11.0902		0.61106	-0.31483	0.61144	-21.5105		0.61076	-0.16536	0.95789	-11.1038		0.50164	7.92096	0.50164	2.36581		0.61103	6.73692	0.61106	-0.35145
0.57023	1.90499	0.56929	-10.9752		0.66252	-0.44658	0.66293	-21.5111		0.6622	-0.35038	1	-11.1194		0.55955	7.59145	0.55959	2.11158		0.66247	6.63343	0.66252	-0.6433
0.62338	2.10707	0.62223	-11.1034		0.71398	-0.38997	0.71443	-21.5119		0.71363	-0.30067	0	--		0.61098	7.88421	0.61105	2.44813		0.71392	6.64389	0.71398	-0.767
0.67654	2.20344	0.67517	-11.1233		0.75468	-0.51118	0.75531	-21.5123		0.75419	-0.4584	0	-11.1188		0.6624	7.91273	0.6625	2.38803		0.75464	6.49772	0.75469	-0.65181
0.72969	2.39458	0.72811	-11.1901		0.79539	-0.40819	0.79619	-21.5128		0.79475	-0.37267	0.04211	-11.1031		0.71382	7.95694	0.71396	2.2283		0.79536	6.38748	0.79539	-0.6865
0.77667	2.4497	0.77451	-11.0377		0.8361	-0.70906	0.83707	-21.5134		0.8353	-0.64074	0.08423	-11.0581		0.77496	7.98804	0.77501	2.35945		0.83608	6.18512	0.8361	-0.89397
0.82366	2.35454	0.82091	-11.0232		0.87707	-0.33135	0.8778	-21.5121		0.87648	-0.29115	0.12634	-11.1227		0.8361	7.92711	0.83607	2.4775		0.87706	6.38936	0.87707	-0.54304
[truncated: 9,079 more rows]

## Sheet: Sheet2
Density of states (DOS)
α-SnTe																									β-SnTe
Enargy					DOS									Enargy,E		Enargy, E		Enargy		Enargy		Enargy			Enargy, E		Enargy, E		Enargy, E	DOS									Enargy		Enargy, E		Enargy, E		Enargy		Enargy
eV					states/eV									eV		eV		eV		eV		eV			eV					states/eV									eV		eV		eV		eV		eV
	α-SnTe Monolayer		α-SnTe Bilayer		Sn-5s Mono		Sn-5s Bi		Sn- 5p Mono		Sn- 5p Bi		Sn- 4d Mono		Sn- 4d Bi		Te- 5s Mono		Te-5s Bi		Te- 5p Mono		Te-5p Bi			β-SnTe Monolayer		β-SnTe Bilayer		Sn-5s Mono		Sn-5s Bi		Sn- 5p Mono		Sn- 5p Bi		Sn- 4d Mono		Sn- 4d Bi		Te- 5s Mono		Te-5s Bi		Te- 5p Mono		Te-5p Bi
-23.1433	0	-23.4102	0	-23.1433	0	-23.4102	0	-23.1433	0	-23.4102	0	-23.1433	0	-23.4102	0	-23.1433	0	-23.4102	0	-23.1433	0	-23.4102	0		-23.3553	0	-23.3897	0	-23.3553	0	-23.3897	0	-23.3553	0	-23.3897	0	-23.3553	0	-23.3897	0	-23.3553	0	-23.3897	0	-23.3553	0	-23.3897	0
-23.1322	0	-23.3992	0	-23.1322	0	-23.3992	0	-23.1322	0	-23.3992	0	-23.1322	0	-23.3992	0	-23.1322	0	-23.3992	0	-23.1322	0	-23.3992	0		-23.3442	0	-23.3788	0	-23.3442	0	-23.3788	0	-23.3442	0	-23.3788	0	-23.3442	0	-23.3788	0	-23.3442	0	-23.3788	0	-23.3442	0	-23.3788	0
-22.0588	0.000133471	-22.3321	0.000233641	-21.6494	0.000102164	-21.727	0.000107022	-21.6494	0.000108015	-21.958	0.000110621	-22.0588	0.000133227	-22.3321	0.000233243	-21.8154	0.000100505	-22.123	0.000105989	-21.8043	0.000117531	-22.123	0.00010065		-22.2613	0.00115	-22.3041	0.000998774	-21.4215	0.000101502	-21.6682	0.000104855	-21.8635	0.000102793	-21.9313	0.000105721	-22.2613	0.00115	-22.3041	0.000997531	-22.0292	0.000105275	-22.1068	0.000102779	-22.0292	0.000110793	-22.0958	0.000114818
-22.0478	0.00102	-22.3211	0.00194	-21.6383	0.000109337	-21.716	0.000117029	-21.6383	0.000124926	-21.947	0.000128941	-22.0478	0.00102	-22.3211	0.00193	-21.8043	0.000121218	-22.112	0.000128925	-21.7933	0.000141549	-22.112	0.000122592		-22.2502	0.00371	-22.2932	0.00383	-21.4104	0.000103643	-21.6572	0.000113682	-21.8524	0.000118334	-21.9204	0.000123203	-22.2502	0.00371	-22.2932	0.00383	-22.0182	0.000126642	-22.0958	0.000125149	-22.0182	0.000133467	-22.0848	0.00013952
-22.0367	0.00228	-22.3101	0.00591	-21.6273	0.000116662	-21.705	0.000127587	-21.6273	0.000144047	-21.936	0.000149843	-22.0367	0.00228	-22.3101	0.00591	-21.7933	0.000145755	-22.101	0.000156351	-21.7822	0.000169959	-22.101	0.000148868		-22.2392	0.00685	-22.2822	0.00731	-21.3993	0.000105507	-21.6462	0.000122884	-21.8414	0.000135811	-21.9094	0.000143145	-22.2392	0.00685	-22.2822	0.0073	-22.0071	0.000151881	-22.0848	0.000151933	-22.0071	0.000160293	-22.0739	0.000169029
-22.0256	0.00364	-22.2991	0.00902	-21.6162	0.000124102	-21.694	0.000138678	-21.6162	0.000165592	-21.925	0.000173608	-22.0256	0.00363	-22.2991	0.00901	-21.7822	0.000174726	-22.09	0.000189039	-21.7711	0.000203452	-22.09	0.000180232		-22.2281	0.00877	-22.2712	0.01233	-21.3883	0.000107079	-21.6353	0.000132433	-21.8303	0.000155394	-21.8984	0.000165817	-22.2281	0.00876	-22.2712	0.01233	-21.9961	0.000181595	-22.0739	0.000183896	-21.9961	0.000191924	-22.0629	0.000204167
-22.0146	0.00585	-22.288	0.01414	-21.6051	0.00013162	-21.683	0.00015028	-21.6051	0.000189783	-21.914	0.000200538	-22.0146	0.00584	-22.288	0.01413	-21.7711	0.000208819	-22.079	0.000227873	-21.7601	0.000242806	-22.079	0.000217546		-22.2171	0.01117	-22.2603	0.01678	-21.3773	0.000108343	-21.6243	0.000142297	-21.8193	0.00017726	-21.8875	0.000191506	-22.2171	0.01117	-22.2603	0.01677	-21.985	0.000216462	-22.0629	0.000221919	-21.985	0.000229097	-22.0519	0.000245871
-22.0035	0.00791	-22.277	0.01805	-21.5941	0.000139172	-21.6719	0.000162361	-21.5941	0.000216849	-21.903	0.000230947	-22.0035	0.0079	-22.277	0.01804	-21.7601	0.000248806	-22.068	0.000273856	-21.749	0.000288892	-22.068	0.000261793		-22.206	0.0142	-22.2493	0.02135	-21.3662	0.000109288	-21.6133	0.000152439	-21.8082	0.000201587	-21.8765	0.000220513	-22.206	0.01419	-22.2493	0.02134	-21.974	0.000257236	-22.0519	0.000267001	-21.974	0.000272638	-22.041	0.000295207
-21.9925	0.01109	-22.266	0.02297	-21.583	0.000146714	-21.6609	0.000174886	-21.583	0.000247024	-21.892	0.000265167	-21.9925	0.01108	-22.266	0.02295	-21.749	0.000295549	-22.057	0.000328127	-21.7379	0.000342683	-22.057	0.000314092		-22.195	0.01799	-22.2384	0.02709	-21.3551	0.000109907	-21.6024	0.000162814	-21.7972	0.000228555	-21.8655	0.000253154	-22.195	0.01798	-22.2384	0.02708	-21.9629	0.000304759	-22.041	0.000320282	-21.9629	0.000323466	-22.03	0.000353384
-21.9814	0.01409	-22.2551	0.02914	-21.572	0.0001542	-21.65	0.000187809	-21.572	0.000280546	-21.881	0.00030354	-21.9814	0.01408	-22.2551	0.02912	-21.7379	0.000350007	-22.046	0.000391967	-21.7269	0.000405256	-22.046	0.000375702		-22.1839	0.02273	-22.2274	0.03428	-21.3441	0.000110229	-21.5914	0.000173376	-21.7861	0.000258342	-21.8546	0.000289756	-22.1839	0.02272	-22.2274	0.03426	-21.9519	0.000359962	-22.03	0.000383045	-21.9519	0.000382602	-22.0191	0.000421759
-21.9703	0.01784	-22.2441	0.03686	-21.5609	0.000161579	-21.639	0.000201081	-21.5609	0.000317651	-21.87	0.000346421	-21.9703	0.01783	-22.2441	0.03684	-21.7269	0.000413239	-22.035	0.000466817	-21.7158	0.000477801	-22.035	0.000448043		-22.1729	0.02862	-22.2164	0.04323	-21.3331	0.000110288	-21.5804	0.00018407	-21.7751	0.000291123	-21.8436	0.000330659	-22.1729	0.02861	-22.2164	0.04321	-21.9408	0.000423869	-22.0191	0.000456738	-21.9408	0.000451171	-22.0081	0.000501858
-21.9593	0.02252	-22.233	0.04649	-21.5498	0.000168801	-21.6279	0.000214641	-21.5498	0.000358575	-21.859	0.00039417	-21.9593	0.02251	-22.233	0.04646	-21.7158	0.000486413	-22.024	0.000554284	-21.7047	0.000561622	-22.024	0.000532704		-22.1618	0.03594	-22.2055	0.05437	-21.322	0.000110143	-21.5695	0.000194839	-21.764	0.000327065	-21.8326	0.000376206	-22.1618	0.03592	-22.2055	0.05434	-21.9298	0.000497601	-22.0081	0.000542979	-21.9298	0.00053041	-21.9971	0.000595382
-21.9482	0.02835	-22.222	0.05846	-21.5388	0.000175816	-21.6169	0.000228426	-21.5388	0.000403544	-21.848	0.000447149	-21.9482	0.02834	-22.222	0.05842	-21.7047	0.000570803	-22.013	0.000656156	-21.6937	0.000658144	-22.013	0.000631454		-22.1508	0.04498	-22.1945	0.06817	-21.3109	0.000109759	-21.5585	0.000205621	-21.753	0.000366326	-21.8217	0.000426746	-22.1508	0.04496	-22.1945	0.06813	-21.9187	0.000582379	-21.9971	0.000643573	-21.9187	0.000621666	-21.9861	0.000704221
-21.9371	0.03558	-22.211	0.07328	-21.5277	0.00018257	-21.6059	0.000242365	-21.5277	0.000452778	-21.837	0.000505723	-21.9371	0.03556	-22.211	0.07324	-21.6937	0.000667799	-22.002	0.00077441	-21.6826	0.000768915	-22.002	0.000746254		-22.1397	0.05614	-22.1835	0.08521	-21.2999	0.000109043	-21.5475	0.00021635	-21.7419	0.000409051	-21.8107	0.000482627	-22.1397	0.05611	-22.1835	0.08517	-21.9077	0.000679523	-21.9861	0.000760521	-21.9077	0.000726405	-21.9752	0.000830465
-21.9261	0.04452	-22.2	0.09159	-21.5166	0.000189013	-21.5949	0.00025638	-21.5166	0.00050648	-21.826	0.000570247	-21.9261	0.0445	-22.2	0.09154	-21.6826	0.000778903	-21.991	0.000911221	-21.6715	0.000895604	-21.991	0.000879268		-22.1287	0.06984	-22.1726	0.1062	-21.2889	0.000108002	-21.5366	0.000226958	-21.7309	0.000455369	-21.7997	0.000544192	-22.1287	0.0698	-22.1726	0.10615	-21.8966	0.000790456	-21.9752	0.000896033	-21.8966	0.000846206	-21.9642	0.000976411
-21.915	0.05554	-22.189	0.11412	-21.5056	0.000195094	-21.5839	0.000270388	-21.5056	0.000564835	-21.815	0.000641068	-21.915	0.0555	-22.189	0.11406	-21.6715	0.000905731	-21.98	0.00107	-21.6605	0.00104	-21.98	0.00103		-22.1176	0.08662	-22.1616	0.13197	-21.2778	0.000106646	-21.5256	0.000237373	-21.7198	0.000505389	-21.7888	0.000611775	-22.1176	0.08658	-22.1616	0.1319	-21.8856	0.000916697	-21.9642	0.00105	-21.8856	0.000982765	-21.9533	0.00114
-21.9039	0.06907	-22.178	0.14178	-21.4945	0.000200765	-21.5729	0.000284303	-21.4945	0.000628005	-21.804	0.000718516	-21.9039	0.06902	-22.178	0.1417	-21.6605	0.00105	-21.969	0.00125	-21.6494	0.0012	-21.969	0.00121		-22.1066	0.10711	-22.1506	0.16349	-21.2667	0.000104986	-21.5146	0.000247524	-21.7088	0.000559197	-21.7778	0.000685692	-22.1066	0.10706	-22.1506	0.16341	-21.8745	0.00106	-21.9533	0.00123	-21.8745	0.00114	-21.9423	0.00134
-21.8929	0.08563	-22.167	0.17561	-21.4834	0.000205979	-21.5619	0.000298033	-21.4834	0.000696125	-21.793	0.000802895	-21.8929	0.08558	-22.167	0.17551	-21.6494	0.00121	-21.958	0.00146	-21.6383	0.00139	-21.958	0.00141		-22.0955	0.13205	-22.1397	0.20194	-21.2557	0.000103038	-21.5037	0.000257336	-21.6977	0.00061685	-21.7669	0.000766241	-22.0955	0.13198	-22.1397	0.20183	-21.8635	0.00122	-21.9423	0.00144	-21.8635	0.00131	-21.9313	0.00156
-21.8818	0.10585	-22.156	0.21685	-21.4724	0.000210691	-21.5509	0.000311486	-21.4724	0.000769296	-21.782	0.000894483	-21.8818	0.10579	-22.156	0.21673	-21.6383	0.0014	-21.947	0.00169	-21.6273	0.0016	-21.947	0.00164		-22.0845	0.16229	-22.1287	0.24868	-21.2447	0.000100818	-21.4927	0.000266737	-21.6867	0.000678376	-21.7559	0.00085369	-22.0845	0.1622	-22.1287	0.24855	-21.8524	0.0014	-21.9313	0.00168	-21.8524	0.00151	-21.9204	0.00181
-21.8707	0.13044	-22.145	0.26697	-21.4613	0.000214863	-21.5399	0.000324566	-21.4613	0.000847584	-21.771	0.000993519	-21.8707	0.13036	-22.145	0.26683	-21.6273	0.00161	-21.936	0.00196	-21.6162	0.00183	-21.936	0.00191		-22.0734	0.19885	-22.1177	0.30533	-21.2336	9.83466e-05	-21.4818	0.000275654	-21.6756	0.000743769	-21.7449	0.000948272	-22.0734	0.19874	-22.1177	0.30517	-21.8414	0.00161	-21.9204	0.00194	-21.8414	0.00173	-21.9094	0.0021
-21.8597	0.16027	-22.134	0.32769	-21.4502	0.000218458	-21.5289	0.000337177	-21.4502	0.000931009	-21.76	0.0011	-21.8597	0.16017	-22.134	0.32751	-21.6162	0.00184	-21.925	0.00227	-21.6051	0.0021	-21.925	0.00221		-22.0624	0.24291	-22.1068	0.37376	-12.4596	0.000112621	-21.4708	0.000284017	-21.6646	0.000812983	-21.734	0.00105	-22.0624	0.24278	-22.1068	0.37357	-21.8303	0.00184	-21.9094	0.00225	-21.8303	0.00198	-21.8984	0.00242
-21.8486	0.19631	-22.123	0.401	-21.4392	0.000221444	-21.5179	0.000349223	-21.4392	0.00102	-21.749	0.00121	-21.8486	0.19619	-22.123	0.40079	-21.6051	0.0021	-21.914	0.00262	-21.5941	0.00239	-21.914	0.00255		-22.0513	0.29582	-22.0958	0.45616	-12.4485	0.00013939	-21.4598	0.000291757	-21.6535	0.000885934	-21.723	0.00116	-22.0513	0.29567	-22.0958	0.45593	-21.8193	0.00209	-21.8984	0.0026	-21.8193	0.00226	-21.8875	0.00279
-21.8375	0.23973	-22.112	0.48924	-21.4281	0.000223795	-21.5069	0.00036061	-21.4281	0.00111	-21.738	0.00134	-21.8375	0.23958	-22.112	0.48899	-21.5941	0.00239	-21.903	0.003	-21.583	0.00272	-21.903	0.00293		-22.0403	0.35917	-22.0848	0.55507	-12.4375	0.000172032	-21.4489	0.000298812	-21.6425	0.000962492	-21.712	0.00128	-22.0403	0.35898	-22.0848	0.55479	-21.8082	0.00237	-21.8875	0.00299	-21.8082	0.00257	-21.8765	0.0032
-21.8265	0.29186	-22.101	0.59511	-21.417	0.000225538	-21.4959	0.000371247	-21.417	0.00121	-21.727	0.00147	-21.8265	0.29169	-22.101	0.59479	-21.583	0.00271	-21.892	0.00344	-21.572	0.00308	-21.892	0.00336		-22.0292	0.43475	-22.0739	0.6734	-12.4264	0.000211716	-21.4379	0.000305121	-21.6314	0.00104	-21.701	0.0014	-22.0292	0.43453	-22.0739	0.67306	-21.7972	0.00269	-21.8765	0.00343	-21.7972	0.00291	-21.8655	0.00366
-21.8154	0.35426	-22.09	0.7217	-21.406	0.000226723	-21.4849	0.000381046	-21.406	0.00131	-21.716	0.00161	-21.8154	0.35405	-22.09	0.72132	-21.572	0.00307	-21.881	0.00393	-21.5609	0.00348	-21.881	0.00384		-22.0182	0.52464	-22.0629	0.81452	-12.4154	0.00025982	-21.4269	0.000310632	-21.6204	0.00113	-21.6901	0.00153	-22.0182	0.52437	-22.0629	0.8141	-21.7861	0.00303	-21.8655	0.00392	-21.7861	0.00329	-21.8546	0.00418
-21.8043	0.4287	-22.079	0.87258	-21.3949	0.000227373	-21.4739	0.000389927	-21.3949	0.00142	-21.705	0.00175	-21.8043	0.42844	-22.079	0.87213	-21.5609	0.00346	-21.87	0.00447	-21.5498	0.00392	-21.87	0.00438		-22.0071	0.63119	-22.0519	0.98226	-12.4043	0.000317953	-21.4159	0.000315296	-21.6093	0.00121	-21.6791	0.00167	-22.0071	0.63086	-22.0519	0.98176	-21.7751	0.00341	-21.8546	0.00446	-21.7751	0.00371	-21.8436	0.00476
-21.7933	0.51721	-22.068	1.05184	-21.3838	0.000227426	-21.4629	0.000397813	-21.3838	0.00153	-21.694	0.0019	-21.7933	0.5169	-22.068	1.05129	-21.5498	0.00389	-21.859	0.00507	-21.5388	0.00441	-21.859	0.00497		-21.9961	0.75707	-22.041	1.181	-12.3933	0.000387997	-21.405	0.000319072	-21.5983	0.0013	-21.6682	0.00182	-21.9961	0.75668	-22.041	1.1804	-21.764	0.00382	-21.8436	0.00507	-21.764	0.00417	-21.8326	0.00539
-21.7822	0.62209	-22.057	1.26411	-21.3728	0.000226834	-21.4519	0.000404636	-21.3728	0.00165	-21.683	0.00206	-21.7822	0.62172	-22.057	1.26345	-21.5388	0.00437	-21.848	0.00574	-21.5277	0.00493	-21.848	0.00564		-21.985	0.90528	-22.03	1.41571	-12.3822	0.000472141	-21.394	0.000321927	-21.5872	0.00139	-21.6572	0.00197	-21.985	0.90482	-22.03	1.415	-21.753	0.00428	-21.8326	0.00575	-21.753	0.00466	-21.8217	0.0061
-21.7711	0.74599	-22.046	1.51464	-21.3617	0.000225604	-21.4409	0.000410337	-21.3617	0.00177	-21.6719	0.00223	-21.7711	0.74554	-22.046	1.51385	-21.5277	0.00488	-21.837	0.00647	-21.5166	0.00551	-21.837	0.00637		-21.974	1.07922	-22.0191	1.692	-12.3712	0.000572921	-21.3831	0.000323858	-21.5762	0.00148	-21.6462	0.00213	-21.974	1.07867	-22.0191	1.69115	-21.7419	0.00477	-21.8217	0.0065	-21.7419	0.00521	-21.8107	0.00688
-21.7601	0.89184	-22.035	1.80936	-21.3506	0.000223811	-21.4299	0.000414864	-21.3506	0.00189	-21.6609	0.00241	-21.7601	0.89131	-22.035	1.80842	-21.5166	0.00544	-21.826	0.00728	-21.5056	0.00613	-21.826	0.00717		-21.9629	1.28267	-22.0081	2.01616	-12.3601	0.000693264	-21.3721	0.000324879	-21.5651	0.00158	-21.6353	0.0023	-21.9629	1.28202	-22.0081	2.01515	-21.7309	0.0053	-21.8107	0.00732	-21.7309	0.00579	-21.7997	0.00773
-21.749	1.06299	-22.024	2.15492	-21.3396	0.000221465	-21.4189	0.000418179	-21.3396	0.00201	-21.65	0.00258	-21.749	1.06236	-22.024	2.1538	-21.5056	0.00604	-21.815	0.00816	-21.4945	0.0068	-21.815	0.00805		-21.9519	1.51983	-21.9971	2.39525	-12.3491	0.000848505	-21.3611	0.000325173	-21.5541	0.00167	-21.6243	0.00247	-21.9519	1.51906	-21.9971	2.39405	-21.7198	0.00587	-21.7997	0.00822	-21.7198	0.00643	-21.7888	0.00866
-21.7379	1.26314	-22.013	2.55875	-21.3285	0.000218484	-21.4079	0.000420296	-21.3285	0.00214	-21.639	0.00277	-21.7379	1.26239	-22.013	2.55743	-21.4945	0.00669	-21.804	0.00912	-21.4834	0.00752	-21.804	0.00901		-21.9408	1.79537	-21.9861	2.83711	-12.338	0.00102	-21.3502	0.000324841	-21.543	0.00177	-21.6133	0.00265	-21.9408	1.79446	-21.9861	2.83568	-21.7088	0.00648	-21.7888	0.0092	-21.7088	0.00711	-21.7778	0.00968
-21.7269	1.49643	-22.002	3.02912	-21.3174	0.000214894	-21.3969	0.000421295	-21.3174	0.00227	-21.6279	0.00296	-21.7269	1.49555	-22.002	3.02756	-21.4834	0.00739	-21.793	0.01017	-21.4724	0.00829	-21.793	0.01005		-21.9298	2.1144	-21.9752	3.35043	-12.327	0.00123	-21.3392	0.000323755	-21.532	0.00186	-21.6024	0.00283	-21.9298	2.11333	-21.9752	3.34875	-21.6977	0.00713	-21.7778	0.01027	-21.6977	0.00784	-21.7669	0.01078
-21.7158	1.76744	-21.991	3.57516	-21.3064	0.000210727	-21.3859	0.000421415	-21.3064	0.00239	-21.6169	0.00315	-21.7158	1.7664	-21.991	3.57332	-21.4724	0.00813	-21.782	0.0113	-21.4613	0.00912	-21.782	0.01118		-21.9187	2.48255	-21.9642	3.9448	-12.3159	0.00147	-21.3282	0.000321794	-21.5209	0.00196	-21.5914	0.00301	-21.9187	2.48129	-21.9642	3.94283	-21.6867	0.00783	-21.7669	0.01143	-21.6867	0.00862	-21.7559	0.01198
-21.7047	2.0812	-21.98	4.20693	-21.2953	0.00020602	-21.3749	0.00042068	-21.2953	0.00252	-21.6059	0.00334	-21.7047	2.07998	-21.98	4.20478	-21.4613	0.00893	-21.771	0.01251	-21.4502	0.00999	-21.771	0.01241		-21.9077	2.90592	-21.9533	4.63073	-12.3049	0.00176	-21.3173	0.000318888	-21.5099	0.00205	-21.5804	0.0032	-21.9077	2.90446	-21.9533	4.62842	-21.6756	0.00857	-21.7559	0.01269	-21.6756	0.00945	-21.7449	0.01326
-21.6937	2.44325	-21.969	4.93545	-21.2842	0.000200811	-21.3639	0.000418879	-21.2842	0.00264	-21.5949	0.00354	-21.6937	2.44182	-21.969	4.93292	-21.4502	0.00977	-21.76	0.01382	-21.4392	0.01092	-21.76	0.01372		-21.8966	3.39115	-21.9423	5.41968	-12.2938	0.00209	-21.3063	0.000315062	-21.4988	0.00214	-21.5695	0.00339	-21.8966	3.38945	-21.9423	5.41698	-21.6646	0.00935	-21.7449	0.01404	-21.6646	0.01032	-21.734	0.01464
-21.6826	2.85958	-21.958	5.7727	-21.2732	0.000195145	-21.3529	0.000415907	-21.2732	0.00277	-21.5839	0.00373	-21.6826	2.85792	-21.958	5.76975	-21.4392	0.01065	-21.749	0.01522	-21.4281	0.0119	-21.749	0.01513		-21.8856	3.94537	-21.9313	6.32408	-12.2828	0.00249	-21.2953	0.00031035	-21.4878	0.00223	-21.5585	0.00358	-21.8856	3.94339	-21.9313	6.32094	-21.6535	0.01017	-21.734	0.01548	-21.6535	0.01125	-21.723	0.01612
-21.6715	3.33673	-21.947	6.73165	-21.2621	0.000189068	-21.3419	0.000411712	-21.2621	0.00289	-21.5729	0.00393	-21.6715	3.33479	-21.947	6.72823	-21.4281	0.01159	-21.738	0.0167	-21.417	0.01292	-21.738	0.01663		-21.8745	4.57619	-21.9204	7.35735	-12.2717	0.00295	-21.2844	0.000304795	-21.4767	0.00231	-21.5475	0.00376	-21.8745	4.5739	-21.9204	7.35371	-21.6425	0.01103	-21.723	0.01703	-21.6425	0.01221	-21.712	0.01769
-21.6605	3.8817	-21.936	7.82629	-21.251	0.000182629	-21.3309	0.000406332	-21.251	0.003	-21.5619	0.00412	-21.6605	3.87945	-21.936	7.82231	-21.417	0.01256	-21.727	0.01828	-21.406	0.01399	-21.727	0.01822		-21.8635	5.29172	-21.9094	8.53386	-12.2607	0.00348	-21.2734	0.000298442	-21.4657	0.00239	-21.5366	0.00395	-21.8635	5.28908	-21.9094	8.52964	-21.6314	0.01192	-21.712	0.01867	-21.6314	0.01322	-21.701	0.01935
-21.6494	4.50201	-21.925	9.07153	-21.24	0.000175879	-21.3199	0.000399814	-21.24	0.00311	-21.5509	0.00431	-21.6494	4.4994	-21.925	9.06693	-21.406	0.01358	-21.716	0.01995	-21.3949	0.01511	-21.716	0.01991		-21.8524	6.10051	-21.8984	9.86892	-12.2496	0.0041	-21.2624	0.000291348	-21.4546	0.00247	-21.5256	0.00413	-21.8524	6.09747	-21.8984	9.86404	-21.6204	0.01285	-21.701	0.02041	-21.6204	0.01427	-21.6901	0.02111
-21.6383	5.20563	-21.914	10.4833	-21.2289	0.000168868	-21.3089	0.000392216	-21.2289	0.00322	-21.5399	0.00449	-21.6383	5.20262	-21.914	10.478	-21.3949	0.01463	-21.705	0.0217	-21.3838	0.01626	-21.705	0.02169		-21.8414	7.01153	-21.8875	11.3787	-12.2386	0.00482	-21.2515	0.000283572	-21.4436	0.00254	-21.5146	0.00431	-21.8414	7.00804	-21.8875	11.3731	-21.6093	0.01381	-21.6901	0.02224	-21.6093	0.01536	-21.6791	0.02296
-21.6273	6.00098	-21.903	12.0782	-21.2178	0.000161649	-21.2979	0.000383604	-21.2178	0.00332	-21.5289	0.00467	-21.6273	5.99752	-21.903	12.0721	-21.3838	0.01572	-21.694	0.02354	-21.3728	0.01745	-21.694	0.02356		-21.8303	8.03406	-21.8765	13.0803	-12.2275	0.00565	-21.2405	0.000275177	-21.4325	0.00261	-21.5037	0.00448	-21.8303	8.03008	-21.8765	13.0738	-21.5983	0.01479	-21.6791	0.02417	-21.5983	0.01648	-21.6682	0.0249
-21.6162	6.89691	-21.892	13.874	-21.2068	0.000154273	-21.2869	0.000374052	-21.2068	0.00341	-21.5179	0.00484	-21.6162	6.89294	-21.892	13.867	-21.3728	0.01684	-21.683	0.02545	-21.3617	0.01866	-21.683	0.02551		-21.8193	9.17771	-21.8655	14.9913	-12.2165	0.00661	-21.2295	0.000266231	-21.4215	0.00266	-21.4927	0.00465	-21.8193	9.17317	-21.8655	14.984	-21.5872	0.0158	-21.6682	0.02619	-21.5872	0.01763	-21.6572	0.02692
-21.6051	7.90259	-21.881	15.8887	-21.1957	0.000146791	-21.2759	0.000363638	-21.1957	0.00349	-21.5069	0.005	-21.6051	7.89806	-21.881	15.8808	-21.3617	0.01798	-21.6719	0.02743	-21.3506	0.0199	-21.6719	0.02754		-21.8082	10.4523	-21.8546	17.1303	-12.2054	0.00771	-21.2186	0.000256805	-21.4104	0.00271	-21.4818	0.0048	-21.8082	10.4471	-21.8546	17.1218	-21.5762	0.01682	-21.6572	0.02829	-21.5762	0.0188	-21.6462	0.02901
-21.5941	9.0275	-21.87	18.1413	-21.1847	0.000139251	-21.2649	0.000352451	-21.1847	0.00357	-21.4959	0.00515	-21.5941	9.02233	-21.87	18.1322	-21.3506	0.01914	-21.6609	0.02949	-21.3396	0.02116	-21.6609	0.02964		-21.7972	11.8676	-21.8436	19.5158	-12.1944	0.00897	-21.2076	0.000246972	-21.3993	0.00276	-21.4708	0.00495	-21.7972	11.8618	-21.8436	19.5063	-21.5651	0.01786	-21.6462	0.03046	-21.5651	0.01998	-21.6353	0.03118
-21.583	10.2813	-21.859	20.6509	-21.1736	0.000131701	-21.2539	0.000340578	-21.1736	0.00363	-21.4849	0.00529	-21.583	10.2754	-21.859	20.6406	-21.3396	0.02032	-21.65	0.0316	-21.3285	0.02244	-21.65	0.0318		-21.7861	13.4336	-21.8326	22.1672	-12.1833	0.0104	-21.1967	0.000236805	-21.3883	0.00279	-21.4598	0.00509	-21.7861	13.427	-21.8326	22.1563	-21.5541	0.0189	-21.6353	0.03271	-21.5541	0.02118	-21.6243	0.03341
-21.572	11.6738	-21.848	23.437	-21.1625	0.000124185	-21.2429	0.000328114	-21.1625	0.00369	-21.4739	0.00541	-21.572	11.6671	-21.848	23.4253	-21.3285	0.0215	-21.639	0.03376	-21.3174	0.02371	-21.639	0.03402		-21.7751	15.1599	-21.8217	25.1034	-12.1723	0.01203	-21.1857	0.000226377	-21.3773	0.00282	-21.4489	0.00521	-21.7751	15.1525	-21.8217	25.0912	-21.543	0.01994	-21.6243	0.03501	-21.543	0.02238	-21.6133	0.03569
-21.5609	13.2147	-21.837	26.5188	-21.1515	0.000116746	-21.2319	0.000315155	-21.1515	0.00373	-21.4629	0.00553	-21.5609	13.2072	-21.837	26.5056	-21.3174	0.02268	-21.6279	0.03595	-21.3064	0.02498	-21.6279	0.03629		-21.764	17.0561	-21.8107	28.3437	-12.1612	0.01388	-21.1747	0.00021576	-21.3662	0.00284	-21.4379	0.00532	-21.764	17.0477	-21.8107	28.3299	-21.532	0.02097	-21.6133	0.03737	-21.532	0.02357	-21.6024	0.03801
-21.5498	14.9138	-21.826	29.9156	-21.1404	0.000109423	-21.2209	0.000301796	-21.1404	0.00376	-21.4519	0.00563	-21.5498	14.9053	-21.826	29.9007	-21.3064	0.02385	-21.6169	0.03818	-21.2953	0.02624	-21.6169	0.03859		-21.753	19.131	-21.7997	31.9065	-12.1502	0.01598	-21.1638	0.000205026	-21.3551	0.00285	-21.4269	0.00542	-21.753	19.1217	-21.7997	31.891	-21.5209	0.02199	-21.6024	0.03976	-21.5209	0.02476	-21.5914	0.04036
-21.5388	16.7803	-21.815	33.6459	-21.1293	0.00010225	-21.2099	0.000288133	-21.1293	0.00379	-21.4409	0.00571	-21.5388	16.7708	-21.815	33.6292	-21.2953	0.02501	-21.6059	0.04042	-21.2842	0.02748	-21.6059	0.04091		-21.7419	21.3931	-21.7888	35.8098	-12.1391	0.01834	-21.1528	0.000194243	-21.3441	0.00285	-21.4159	0.0055	-21.7419	21.3827	-21.7888	35.7924	-21.5099	0.02299	-21.5914	0.04219	-21.5099	0.02592	-21.5804	0.04273
-21.5277	18.8233	-21.804	37.7275	-21.1182	9.526e-05	-21.1989	0.00027426	-21.1182	0.0038	-21.4299	0.00577	-21.5277	18.8127	-21.804	37.7088	-21.2842	0.02615	-21.5949	0.04266	-21.2732	0.02869	-21.5949	0.04324		-21.7309	23.8498	-21.7778	40.0705	-12.128	0.021	-21.1418	0.000183476	-21.3331	0.00285	-21.405	0.00557	-21.7309	23.8382	-21.7778	40.051	-21.4988	0.02396	-21.5804	0.04462	-21.4988	0.02706	-21.5695	0.0451
-21.5166	21.0511	-21.793	42.1768	-21.1072	0.000122397	-21.1879	0.000260268	-21.1072	0.00381	-21.4189	0.00582	-21.5166	21.0392	-21.793	42.1561	-21.2732	0.02725	-21.5839	0.0449	-21.2621	0.02987	-21.5839	0.04556		-21.7198	26.5078	-21.7669	44.7041	-12.117	0.02398	-21.1308	0.000172787	-21.322	0.00284	-21.394	0.00562	-21.7198	26.4949	-21.7669	44.6824	-21.4878	0.0249	-21.5695	0.04706	-21.4878	0.02816	-21.5585	0.04746
-21.5056	23.4712	-21.782	47.0091	-21.0961	0.00015188	-21.1769	0.000246247	-21.0961	0.0038	-21.4079	0.00586	-21.5056	23.458	-21.782	46.9859	-21.2621	0.02831	-21.5729	0.0471	-21.251	0.031	-21.5729	0.04787		-21.7088	29.3723	-21.7559	49.7244	-12.1059	0.02732	-21.1199	0.000162234	-21.3109	0.00283	-21.3831	0.00566	-21.7088	29.3581	-21.7559	49.7004	-21.4767	0.02579	-21.5585	0.04948	-21.4767	0.02921	-21.5475	0.04979
-21.4945	26.0903	-21.771	52.2372	-21.085	0.00018789	-21.1659	0.000232279	-21.085	0.00379	-21.3969	0.00587	-21.4945	26.0757	-21.771	52.2116	-21.251	0.02933	-21.5619	0.04927	-21.24	0.03207	-21.5619	0.05014		-21.6977	32.4473	-21.7449	55.1432	-12.0949	0.03104	-21.1089	0.00015187	-21.2999	0.0028	-21.3721	0.00568	-21.6977	32.4317	-21.7449	55.1166	-21.4657	0.02663	-21.5475	0.05187	-21.4657	0.03022	-21.5366	0.05209
-21.4834	28.9139	-21.76	57.8721	-21.074	0.000231726	-21.1549	0.000218444	-21.074	0.00376	-21.3859	0.00588	-21.4834	28.8978	-21.76	57.8438	-21.24	0.03028	-21.5509	0.05138	-21.2289	0.03308	-21.5509	0.05236		-21.6867	35.7353	-21.734	60.9697	-12.0838	0.03517	-21.098	0.000141743	-21.2889	0.00277	-21.3611	0.00568	-21.6867	35.7181	-21.734	60.9404	-21.4546	0.02742	-21.5366	0.05421	-21.4546	0.03116	-21.5256	0.05432
-21.4724	31.9461	-21.749	63.9219	-21.0629	0.000301908	-21.1439	0.000204815	-21.0629	0.00373	-21.3749	0.00587	-21.4724	31.9283	-21.749	63.8907	-21.2289	0.03118	-21.5399	0.05342	-21.2178	0.03402	-21.5399	0.05452		-21.6756	39.2366	-21.723	67.2104	-12.0728	0.03975	-21.087	0.000131895	-21.2778	0.00273	-21.3502	0.00568	-21.6756	39.2178	-21.723	67.1781	-21.4436	0.02815	-21.5256	0.05649	-21.4436	0.03203	-21.5146	0.05649
-21.4613	35.1893	-21.738	70.3916	-21.0519	0.000371051	-21.1329	0.000191457	-21.0519	0.00368	-21.3639	0.00585	-21.4613	35.1698	-21.738	70.3573	-21.2178	0.032	-21.5289	0.05537	-21.2068	0.03487	-21.5289	0.05659		-21.6646	42.9499	-21.712	73.8683	-12.0617	0.04481	-21.076	0.000122364	-21.2667	0.00268	-21.3392	0.00566	-21.6646	42.9293	-21.712	73.8329	-21.4325	0.0288	-21.5146	0.05868	-21.4325	0.03283	-21.5037	0.05856
-21.4502	38.6445	-21.727	77.2829	-21.0408	0.000454689	-21.1219	0.000178431	-21.0408	0.00362	-21.3529	0.00581	-21.4502	38.623	-21.727	77.2454	-21.2068	0.03275	-21.5179	0.05723	-21.1957	0.03565	-21.5179	0.05856		-21.6535	46.8716	-21.701	80.9432	-12.0507	0.0504	-21.0651	0.000113182	-21.2557	0.00263	-21.3282	0.00563	-21.6535	46.8492	-21.701	80.9044	-21.4215	0.02938	-21.5037	0.06078	-21.4215	0.03354	-21.4927	0.06053
-21.4392	42.3104	-21.716	84.5935	-21.0297	0.000555544	-21.1109	0.000165791	-21.0297	0.00356	-21.3419	0.00575	-21.4392	42.287	-21.716	84.5525	-21.1957	0.03341	-21.5069	0.05896	-21.1847	0.03632	-21.5069	0.06042		-21.6425	50.9957	-21.6901	88.4305	-12.0396	0.05653	-21.0541	0.000104375	-21.2447	0.00257	-21.3173	0.00558	-21.6425	50.9714	-21.6901	88.3883	-21.4104	0.02989	-21.4927	0.06277	-21.4104	0.03417	-21.4818	0.06238
-21.4281	46.1838	-21.705	92.3169	-21.0187	0.000676781	-21.0999	0.000153583	-21.0187	0.00348	-21.3309	0.00568	-21.4281	46.1583	-21.705	92.2722	-21.1847	0.03398	-21.4959	0.06057	-21.1736	0.0369	-21.4959	0.06215		-21.6314	55.3139	-21.6791	96.3216	-12.0286	0.06325	-21.0431	9.59659e-05	-21.2336	0.0025	-21.3063	0.00551	-21.6314	55.2876	-21.6791	96.2757	-21.3993	0.03031	-21.4818	0.06463	-21.3993	0.0347	-21.4708	0.06409
-21.417	50.2592	-21.694	100.442	-21.0076	0.000822064	-21.0889	0.000141845	-21.0076	0.0034	-21.3199	0.00559	-21.417	50.2315	-21.694	100.394	-21.1736	0.03446	-21.4849	0.06203	-21.1625	0.03738	-21.4849	0.06374		-21.6204	59.8152	-21.6682	104.603	-12.0175	0.07059	-12.6656	0.000102089	-21.2225	0.00242	-21.2953	0.00543	-21.6204	59.7868	-21.6682	104.554	-21.3883	0.03064	-21.4708	0.06635	-21.3883	0.03514	-21.4598	0.06565
-21.406	54.5286	-21.683	108.954	-20.9965	0.000995617	-21.0779	0.00013061	-20.9965	0.00331	-21.3089	0.00549	-21.406	54.4987	-21.683	108.901	-21.1625	0.03484	-21.4739	0.06333	-21.1515	0.03774	-21.4739	0.06517		-21.6093	64.4859	-21.6572	113.258	-12.0065	0.07859	-12.6546	0.000126231	-21.2115	0.00235	-21.2844	0.00533	-21.6093	64.4554	-21.6572	113.204	-21.3773	0.03088	-21.4598	0.0679	-21.3773	0.03547	-21.4489	0.06705
-21.3949	58.9816	-21.6719	117.831	-20.9855	0.0012	-21.0668	0.000119902	-20.9855	0.00321	-21.2979	0.00537	-21.3949	58.9493	-21.6719	117.775	-21.1515	0.03511	-21.4629	0.06447	-21.1404	0.038	-21.4629	0.06644		-21.5983	69.3099	-21.6462	122.261	-11.9954	0.08728	-12.6437	0.000155647	-21.2005	0.00226	-21.2734	0.00522	-21.5983	69.2772	-21.6462	122.203	-21.3662	0.03102	-21.4489	0.06929	-21.3662	0.03569	-21.4379	0.06827
-21.3838	63.6051	-21.6609	127.048	-20.9744	0.00145	-21.0558	0.000109741	-20.9744	0.0031	-21.2869	0.00524	-21.3838	63.5703	-21.6609	126.987	-21.1404	0.03529	-21.4519	0.06543	-21.1293	0.03816	-21.4519	0.06752		-21.5872	74.268	-21.6353	131.586	-11.9844	0.09668	-12.6327	0.000191383	-21.1894	0.00218	-21.2624	0.0051	-21.5872	74.2331	-21.6353	131.524	-21.3551	0.03108	-21.4379	0.07049	-21.3551	0.03581	-21.4269	0.06931
-21.3728	68.3833	-21.65	136.574	-20.9633	0.00175	-21.0449	0.000100138	-20.9633	0.00299	-21.2759	0.0051	-21.3728	68.3461	-21.65	136.509	-21.1293	0.03538	-21.4409	0.06621	-21.1182	0.03823	-21.4409	0.06842		-21.5762	79.3387	-21.6243	141.199	-11.9733	0.10683	-12.6217	0.000234669	-21.1783	0.00209	-21.2515	0.00497	-21.5762	79.3015	-21.6243	141.132	-21.3441	0.03108	-21.4269	0.0715	-21.3441	0.03584	-21.4159	0.07015
-21.3617	73.2979	-21.639	146.372	-20.9523	0.00209	-21.0339	9.11005e-05	-20.9523	0.00287	-21.2649	0.00495	-21.3617	73.2581	-21.639	146.302	-21.1182	0.03538	-21.4299	0.06679	-21.1072	0.0382	-21.4299	0.06912		-21.5651	84.4977	-21.6133	151.061	-11.9623	0.11775	-12.6108	0.000286948	-21.1673	0.00199	-21.2405	0.00482	-21.5651	84.4581	-21.6133	150.99	-21.3331	0.03103	-21.4159	0.0723	-21.3331	0.03582	-21.405	0.07079
-21.3506	78.3279	-21.6279	156.401	-20.9412	0.0025	-12.3864	0.00012236	-20.9412	0.00275	-21.2539	0.00478	-21.3506	78.2855	-21.6279	156.327	-21.1072	0.0353	-21.4189	0.06717	-21.0961	0.03808	-21.4189	0.06961		-21.5541	89.7183	-21.6024	161.129	-11.9512	0.12946	-12.5998	0.000349901	-21.1562	0.0019	-21.2295	0.00467	-21.5541	89.6764	-21.6024	161.053	-21.322	0.0309	-21.405	0.0729	-21.322	0.03571	-21.394	0.07122
-21.3396	83.4496	-21.6169	166.614	-20.9301	0.00297	-12.3754	0.00015225	-20.9301	0.00263	-21.2429	0.00461	-21.3396	83.4045	-21.6169	166.535	-21.0961	0.03514	-21.4079	0.06737	-21.085	0.03786	-21.4079	0.0699		-21.543	94.9717	-21.5914	171.354	-11.9402	0.142	-12.5888	0.000425487	-21.1452	0.00181	-21.2186	0.0045	-21.543	94.9274	-21.5914	171.274	-21.3109	0.03067	-21.394	0.07328	-21.3109	0.0355	-21.3831	0.07146
-21.3285	88.6371	-21.6059	176.96	-20.9191	0.00353	-12.3644	0.000204868	-20.9191	0.00251	-21.2319	0.00443	-21.3285	88.5893	-21.6059	176.876	-21.085	0.03488	-21.3969	0.06742	-21.074	0.03754	-21.3969	0.07003		-21.532	100.227	-21.5804	181.684	-11.9291	0.15536	-12.5779	0.000519157	-21.1341	0.00171	-21.2076	0.00433	-21.532	100.18	-21.5804	181.598	-21.2999	0.03035	-21.3831	0.07349	-21.2999	0.03519	-21.3721	0.07154
-21.3174	93.862	-21.5949	187.383	-20.908	0.00418	-12.3534	0.000254157	-20.908	0.00238	-21.2209	0.00425	-21.3174	93.8116	-21.5949	187.294	-21.074	0.03452	-21.3859	0.06735	-21.0629	0.03711	-21.3859	0.07002		-21.5209	105.451	-21.5695	192.06	-11.9181	0.16956	-12.5669	0.000628062	-21.1231	0.00162	-21.1967	0.00415	-21.5209	105.402	-21.5695	191.97	-21.2889	0.02994	-21.3721	0.07353	-21.2889	0.03477	-21.3611	0.07147
-21.3064	99.0941	-21.5839	197.822	-20.8969	0.00494	-12.3424	0.000314405	-20.8969	0.00225	-21.2099	0.00406	-21.3064	99.0409	-21.5839	197.729	-21.0629	0.03406	-21.3749	0.06712	-21.0519	0.03657	-21.3749	0.06986		-21.5099	110.609	-21.5585	202.422	-11.907	0.18462	-12.5559	0.000757741	-21.112	0.00152	-21.1857	0.00397	-21.5099	110.558	-21.5585	202.327	-21.2778	0.02944	-21.3611	0.0734	-21.2778	0.03425	-21.3502	0.07124
-21.2953	104.301	-21.5729	208.215	-20.8859	0.00581	-12.3314	0.000387827	-20.8859	0.00213	-21.1989	0.00386	-21.2953	104.245	-21.5729	208.117	-21.0519	0.0335	-21.3639	0.06669	-21.0408	0.03593	-21.3639	0.0695		-21.4988	115.667	-21.5475	212.705	-11.896	0.20052	-12.545	0.000911708	-21.101	0.00143	-21.1747	0.00379	-21.4988	115.614	-21.5475	212.606	-21.2667	0.02887	-21.3502	0.07311	-21.2667	0.03364	-21.3392	0.07082
-21.2842	109.449	-21.5619	218.494	-20.8748	0.00682	-12.3204	0.000477034	-20.8748	0.002	-21.1879	0.00367	-21.2842	109.391	-21.5619	218.391	-21.0408	0.03285	-21.3529	0.06607	-21.0297	0.0352	-21.3529	0.06895		-21.4878	120.588	-21.5366	222.843	-11.8849	0.21726	-12.534	0.00111	-21.0899	0.00134	-21.1638	0.0036	-21.4878	120.533	-21.5366	222.739	-21.2557	0.02822	-21.3392	0.07262	-21.2557	0.03293	-21.3282	0.0702
-21.2732	114.504	-21.5509	228.59	-20.8637	0.00799	-12.3094	0.000585095	-20.8637	0.00188	-21.1769	0.00347	-21.2732	114.443	-21.5509	228.483	-21.0297	0.03212	-21.3419	0.06525	-21.0187	0.03437	-21.3419	0.0682		-21.4767	125.337	-21.5256	232.766	-11.8739	0.23484	-12.523	0.00132	-21.0789	0.00125	-21.1528	0.00341	-21.4767	125.279	-21.5256	232.657	-21.2447	0.0275	-21.3282	0.07191	-21.2447	0.03215	-21.3173	0.06937
-21.2621	119.429	-21.5399	238.433	-20.8527	0.00932	-12.2984	0.000715599	-20.8527	0.00176	-21.1659	0.00328	-21.2621	119.366	-21.5399	238.322	-21.0187	0.03131	-21.3309	0.06426	-21.0076	0.03347	-21.3309	0.06725		-21.4657	129.875	-21.5146	242.404	-11.8628	0.25323	-12.5121	0.00158	-21.0678	0.00116	-21.1418	0.00322	-21.4657	129.816	-21.5146	242.291	-21.2336	0.02672	-21.3173	0.071	-21.2336	0.03128	-21.3063	0.06834
-21.251	124.189	-21.5289	247.952	-20.8416	0.01085	-12.2874	0.000872736	-20.8416	0.00164	-21.1549	0.00308	-21.251	124.124	-21.5289	247.836	-21.0076	0.03042	-21.3199	0.06309	-20.9965	0.03249	-21.3199	0.06612		-21.4546	134.169	-21.5037	251.686	-11.8518	0.2724	-12.5011	0.00188	-21.0568	0.00107	-21.1308	0.00303	-21.4546	134.107	-21.5037	251.57	-21.2225	0.02588	-21.3063	0.06989	-21.2225	0.03035	-21.2953	0.06713
-21.24	128.748	-21.5179	257.074	-20.8305	0.0126	-12.2764	0.00106	-20.8305	0.00152	-21.1439	0.00289	-21.24	128.68	-21.5179	256.955	-20.9965	0.02947	-21.3089	0.06175	-20.9855	0.03144	-21.3089	0.06481		-21.4436	138.182	-21.4927	260.543	-11.8407	0.29234	-12.4901	0.00224	-21.0457	0.00099297	-21.1199	0.00285	-21.4436	138.119	-21.4927	260.423	-21.2115	0.025	-21.2953	0.06859	-21.2115	0.02935	-21.2844	0.06574
-21.2289	133.071	-21.5069	265.73	-20.8195	0.0146	-12.2654	0.00129	-20.8195	0.00141	-21.1329	0.00271	-21.2289	133.001	-21.5069	265.607	-20.9855	0.02846	-21.2979	0.06026	-20.9744	0.03033	-21.2979	0.06333		-21.4325	141.883	-21.4818	268.905	-11.8297	0.31298	-12.4792	0.00265	-21.0347	0.000915064	-21.1089	0.00267	-21.4325	141.819	-21.4818	268.781	-21.2005	0.02406	-21.2844	0.06712	-21.2005	0.02831	-21.2734	0.06419
-21.2178	137.122	-21.4959	273.851	-20.8084	0.01685	-12.2544	0.00156	-20.8084	0.0013	-21.1219	0.00252	-21.2178	137.05	-21.4959	273.725	-20.9744	0.02741	-21.2869	0.05863	-20.9633	0.02917	-21.2869	0.06171		-21.4215	145.24	-21.4708	276.707	-11.8186	0.3343	-12.4682	0.00313	-21.0236	0.000840704	-21.098	0.00249	-21.4215	145.174	-21.4708	276.579	-21.1894	0.0231	-21.2734	0.06548	-21.1894	0.02721	-21.2624	0.06249
-21.2068	140.868	-21.4849	281.371	-20.7973	0.0194	-12.2434	0.00189	-20.7973	0.0012	-21.1109	0.00235	-21.2068	140.795	-21.4849	281.241	-20.9633	0.02631	-21.2759	0.05687	-20.9523	0.02798	-21.2759	0.05994		-21.4104	148.223	-21.4598	283.883	-11.8076	0.35624	-12.4573	0.00369	-21.0126	0.000770037	-21.087	0.00232	-21.4104	148.156	-21.4598	283.752	-21.1783	0.0221	-21.2624	0.06369	-21.1783	0.02608	-21.2515	0.06065
-21.1957	144.279	-21.4739	288.227	-20.7863	0.02228	-12.2324	0.00228	-20.7863	0.0011	-21.0999	0.00217	-21.1957	144.204	-21.4739	288.095	-20.9523	0.02518	-21.2649	0.05499	-20.9412	0.02675	-21.2649	0.05805		-21.3993	150.808	-21.4489	290.375	-11.7965	0.37873	-12.4463	0.00436	-21.0015	0.000703163	-21.076	0.00215	-21.3993	150.74	-21.4489	290.242	-21.1673	0.02108	-21.2515	0.06176	-21.1673	0.02492	-21.2405	0.05869
-21.1847	147.325	-21.4629	294.362	-20.7752	0.02552	-12.2214	0.00274	-20.7752	0.00101	-21.0889	0.00201	-21.1847	147.249	-21.4629	294.227	-20.9412	0.02403	-21.2539	0.05302	-20.9301	0.02549	-21.2539	0.05605		-21.3883	152.97	-21.4379	296.127	-11.7855	0.40171	-12.4353	0.00511	-20.9905	0.000640142	-21.0651	0.00199	-21.3883	152.902	-21.4379	295.992	-21.1562	0.02005	-21.2405	0.05971	-21.1562	0.02374	-21.2295	0.05662
-21.1736	149.98	-21.4519	299.722	-20.7641	0.02914	-12.2104	0.00328	-20.7641	0.000921608	-21.0779	0.00185	-21.1736	149.902	-21.4519	299.585	-20.9301	0.02285	-21.2429	0.05097	-20.9191	0.02423	-21.2429	0.05395		-21.3773	154.692	-21.4269	301.091	-11.7744	0.4251	-12.4244	0.00598	-20.9794	0.000580997	-21.0541	0.00184	-21.3773	154.623	-21.4269	300.954	-21.1452	0.01901	-21.2295	0.05756	-21.1452	0.02254	-21.2186	0.05447
-21.1625	152.221	-21.4409	304.262	-20.7531	0.03319	-12.1994	0.00391	-20.7531	0.000838739	-21.0668	0.0017	-21.1625	152.142	-21.4409	304.123	-20.9191	0.02167	-21.2319	0.04884	-20.908	0.02295	-21.2319	0.05178		-21.3662	155.957	-21.4159	305.223	-11.7634	0.44883	-12.4134	0.00698	-20.9684	0.000525711	-21.0431	0.00169	-21.3662	155.887	-21.4159	305.084	-21.1341	0.01797	-21.2186	0.05532	-21.1341	0.02134	-21.2076	0.05223
-21.1515	154.028	-21.4299	307.941	-20.742	0.0377	-12.1884	0.00466	-20.742	0.000761009	-21.0558	0.00156	-21.1515	153.948	-21.4299	307.801	-20.908	0.02049	-21.2209	0.04667	-20.8969	0.02168	-21.2209	0.04954		-21.3551	156.755	-21.405	308.487	-11.7523	0.47282	-12.4024	0.00812	-20.9573	0.000474238	-21.0322	0.00155	-21.3551	156.685	-21.405	308.346	-21.1231	0.01694	-21.2076	0.05301	-21.1231	0.02015	-21.1967	0.04994
-21.1404	155.39	-21.4189	310.726	-20.7309	0.04272	-12.1774	0.00553	-20.7309	0.00068839	-21.0449	0.00142	-21.1404	155.31	-21.4189	310.585	-20.8969	0.01932	-21.2099	0.04445	-20.8859	0.02041	-21.2099	0.04726		-21.3441	157.127	-21.394	310.854	-11.7413	0.49696	-12.3915	0.00943	-20.9463	0.000426504	-21.0212	0.00142	-21.3441	157.057	-21.394	310.712	-21.112	0.01591	-21.1967	0.05064	-21.112	0.01896	-21.1857	0.04761
-21.1293	156.333	-21.4079	312.605	-20.7199	0.04827	-12.1664	0.00654	-20.7199	0.000620814	-21.0339	0.00129	-21.1293	156.253	-21.4079	312.463	-20.8859	0.01815	-21.1989	0.04222	-20.8748	0.01916	-21.1989	0.04495		-21.3331	157.167	-21.3831	312.349	-11.7302	0.52119	-12.3805	0.01092	-20.9352	0.000382406	-21.0102	0.00129	-21.3331	157.097	-21.3831	312.207	-21.101	0.0149	-21.1857	0.04823	-21.101	0.01779	-21.1747	0.04525
-21.1182	156.888	-21.3969	313.644	-20.7088	0.0544	-12.1554	0.00772	-20.7088	0.000558176	-21.0228	0.00118	-21.1182	156.808	-21.3969	313.502	-20.8748	0.01701	-21.1879	0.03998	-20.8637	0.01794	-21.1879	0.04262		-21.322	156.919	-21.3721	313.081	-11.7192	0.54539	-12.3695	0.01262	-20.9242	0.000341825	-20.9993	0.00117	-21.322	156.849	-21.3721	312.939	-21.0899	0.01392	-21.1747	0.0458	-21.0899	0.01664	-21.1638	0.04288
-21.1072	157.043	-21.3859	313.995	-20.6977	0.06114	-12.1444	0.0091	-20.6977	0.000500337	-21.0118	0.00106	-21.1072	156.963	-21.3859	313.853	-20.8637	0.01589	-21.1769	0.03774	-20.8527	0.01674	-21.1769	0.04029		-21.3109	156.285	-21.3611	313.108	-11.7081	0.56948	-12.3586	0.01454	-20.9131	0.00030462	-20.9883	0.00106	-21.3109	156.216	-21.3611	312.966	-21.0789	0.01296	-21.1638	0.04337	-21.0789	0.01551	-21.1528	0.04051
-21.0961	156.807	-21.3749	313.646	-20.6867	0.06855	-12.1334	0.01068	-20.6867	0.000447132	-21.0008	0.000959288	-21.0961	156.727	-21.3749	313.504	-20.8527	0.01479	-21.1659	0.03552	-20.8416	0.01557	-21.1659	0.03797		-21.2999	155.181	-21.3502	312.45	-11.6971	0.59351	-12.3476	0.01672	-20.9021	0.000270639	-20.9773	0.000958966	-21.2999	155.112	-21.3502	312.309	-21.0678	0.01203	-21.1528	0.04094	-21.0678	0.01442	-21.1418	0.03816
-21.085	156.169	-21.3639	312.558	-20.6756	0.07665	-12.1224	0.01251	-20.6756	0.000398374	-20.9898	0.00086279	-21.085	156.09	-21.3639	312.417	-20.8416	0.01373	-21.1549	0.03332	-20.8305	0.01444	-21.1549	0.03568		-21.2889	153.615	-21.3392	311.051	-11.686	0.61739	-12.3366	0.01917	-20.891	0.000239716	-20.9664	0.000863584	-21.2889	153.547	-21.3392	310.911	-21.0568	0.01113	-21.1418	0.03853	-21.0568	0.01337	-21.1308	0.03583
-21.074	155.128	-21.3529	310.668	-20.6645	0.08549	-12.1114	0.01461	-20.6645	0.000353858	-20.9788	0.000773664	-21.074	155.049	-21.3529	310.528	-20.8305	0.01271	-21.1439	0.03117	-20.8195	0.01335	-21.1439	0.03343		-21.2778	151.602	-21.3282	308.781	-11.675	0.64087	-12.3257	0.02194	-20.88	0.000211681	-20.9554	0.00077536	-21.2778	151.535	-21.3282	308.642	-21.0457	0.01026	-21.1308	0.03615	-21.0457	0.01235	-21.1199	0.03355
-21.0629	153.673	-21.3419	307.86	-20.6535	0.09511	-12.1004	0.01703	-20.6535	0.000313363	-20.9678	0.000691657	-21.0629	153.595	-21.3419	307.722	-20.8195	0.01173	-21.1329	0.02908	-20.8084	0.01231	-21.1329	0.03122		-21.2667	149.161	-21.3173	305.611	-11.6639	0.66384	-12.3147	0.02504	-20.8689	0.000186355	-20.9444	0.000694066	-21.2667	149.095	-21.3173	305.473	-21.0347	0.00944	-21.1199	0.03382	-21.0347	0.01138	-21.1089	0.03132
-21.0519	151.771	-21.3309	304.159	-20.6424	0.10554	-12.0894	0.01979	-20.6424	0.000276662	-20.9568	0.000616481	-21.0519	151.694	-21.3309	304.023	-20.8084	0.01079	-21.1219	0.02704	-20.7973	0.01131	-21.1219	0.02907		-21.2557	146.312	-21.3063	301.569	-11.6529	0.68622	-12.3037	0.02851	-20.8579	0.000163561	-20.9335	0.000619435	-21.2557	146.248	-21.3063	301.434	-21.0236	0.00866	-21.1089	0.03154	-21.0236	0.01045	-21.098	0.02915
-21.0408	149.438	-21.3199	299.598	-20.6314	0.11681	-12.0784	0.02293	-20.6314	0.000243519	-20.9458	0.000547822	-21.0408	149.363	-21.3199	299.465	-20.7973	0.0099	-21.1109	0.02506	-20.7863	0.01036	-21.1109	0.02699		-21.2447	143.081	-21.2953	296.692	-11.6418	0.70792	-12.2928	0.03239	-20.8468	0.000143117	-20.9225	0.000551173	-21.2447	143.018	-21.2953	296.559	-21.0126	0.00791	-21.098	0.02933	-21.0126	0.00957	-21.087	0.02705
-21.0297	146.696	-21.3089	294.218	-20.6203	0.12899	-12.0674	0.02651	-20.6203	0.000213697	-20.9348	0.000485344	-21.0297	146.623	-21.3089	294.087	-20.7863	0.00905	-21.0999	0.02317	-20.7752	0.00947	-21.0999	0.02498		-21.2336	139.496	-21.2844	291.02	-11.6308	0.72887	-12.2818	0.0367	-20.8358	0.000124848	-20.9115	0.000488966	-21.2336	139.435	-21.2844	290.89	-21.0015	0.00721	-21.087	0.02719	-21.0015	0.00873	-21.076	0.02502
-21.0187	143.569	-21.2979	288.065	-20.6092	0.14206	-12.0564	0.03055	-20.6092	0.000186959	-20.9238	0.000428698	-21.0187	143.497	-21.2979	287.937	-20.7752	0.00825	-21.0889	0.02135	-20.7641	0.00862	-21.0889	0.02306		-21.2225	135.586	-21.2734	284.604	-11.6197	0.74898	-12.2708	0.04149	-20.8247	0.000108579	-20.9006	0.000432481	-21.2225	135.527	-21.2734	284.477	-20.9905	0.00655	-21.076	0.02514	-20.9905	0.00795	-21.0651	0.02308
-21.0076	140.082	-21.2869	281.191	-20.5982	0.15607	-12.0454	0.03513	-20.5982	0.000163071	-20.9128	0.000377523	-21.0076	140.012	-21.2869	281.067	-20.7641	0.0075	-21.0779	0.01961	-20.7531	0.00783	-21.0779	0.02121		-21.2115	131.385	-21.2624	277.497	-11.6087	0.76821	-12.2599	0.04679	-20.8137	9.41432e-05	-20.8896	0.000381375	-21.2115	131.328	-21.2624	277.374	-20.9794	0.00593	-21.0651	0.02317	-20.9794	0.00721	-21.0541	0.02123
-20.9965	136.267	-21.2759	273.656	-20.5871	0.17105	-12.0344	0.04028	-20.5871	0.000141804	-20.9018	0.000331456	-20.9965	136.199	-21.2759	273.535	-20.7531	0.00679	-21.0668	0.01796	-20.742	0.00709	-21.0668	0.01946		-21.2005	126.927	-21.2515	269.76	-11.5976	0.78649	-12.2489	0.05264	-12.327	0.000109011	-20.8787	0.000335302	-21.2005	126.872	-21.2515	269.64	-20.9684	0.00536	-21.0541	0.02129	-20.9684	0.00652	-21.0431	0.01946
-20.9855	132.154	-21.2649	265.521	-20.576	0.187	-12.0234	0.04608	-20.576	0.000122937	-20.8908	0.000290135	-20.9855	132.088	-21.2649	265.404	-20.742	0.00613	-21.0558	0.0164	-20.7309	0.0064	-21.0558	0.01779		-21.1894	122.247	-21.2405	261.453	-11.5866	0.80377	-12.2379	0.05909	-12.3159	0.000131688	-20.8677	0.000293913	-21.1894	122.194	-21.2405	261.337	-20.9573	0.00482	-21.0431	0.0195	-20.9573	0.00588	-21.0322	0.01779
-20.9744	127.778	-21.2539	256.852	-20.565	0.20395	-12.0123	0.05257	-20.565	0.000106257	-20.8798	0.000253201	-20.9744	127.714	-21.2539	256.739	-20.7309	0.00552	-21.0449	0.01493	-20.7199	0.00575	-21.0449	0.01622		-21.1783	117.381	-21.2295	252.646	-11.5755	0.82003	-12.227	0.06617	-12.3049	0.000158667	-20.8567	0.000256861	-21.1783	117.331	-21.2295	252.534	-20.9463	0.00433	-21.0322	0.01781	-20.9463	0.00529	-21.0212	0.01621
-20.9633	123.172	-21.2429	247.719	-20.5539	0.2219	-12.0014	0.05983	-20.5539	9.15617e-05	-20.8688	0.000220303	-20.9633	123.111	-21.2429	247.61	-20.7199	0.00496	-21.0339	0.01356	-20.7088	0.00516	-21.0339	0.01475		-21.1673	112.366	-21.2186	243.405	-11.5645	0.83582	-12.216	0.07394	-12.2938	0.000190677	-20.8458	0.000223807	-21.1673	112.318	-21.2186	243.297	-20.9352	0.00387	-21.0212	0.01622	-20.9352	0.00474	-21.0102	0.01473
-20.9523	118.373	-21.2319	238.191	-12.0664	0.24086	-11.9903	0.06791	-12.0664	0.000108424	-20.8578	0.000191102	-20.9523	118.315	-21.2319	238.087	-20.7088	0.00444	-21.0228	0.01227	-20.6977	0.00462	-21.0228	0.01336		-21.1562	107.238	-21.2076	233.801	-11.5534	0.85111	-12.205	0.08242	-12.2828	0.000228549	-20.8348	0.000194424	-21.1562	107.192	-21.2076	233.698	-20.9242	0.00345	-21.0102	0.01473	-20.9242	0.00423	-20.9993	0.01335
-20.9412	113.417	-21.2209	228.341	-12.0553	0.26081	-11.9794	0.07689	-12.0553	0.000131813	-20.8468	0.000165273	-20.9412	113.361	-21.2209	228.241	-20.6977	0.00396	-21.0118	0.01107	-20.6867	0.00412	-21.0118	0.01208		-21.1452	102.033	-21.1967	223.905	-11.5424	0.86532	-12.1941	0.09166	-12.2717	0.000273233	-20.8238	0.000168392	-21.1452	101.989	-21.1967	223.806	-20.9131	0.00307	-20.9993	0.01333	-20.9131	0.00377	-20.9883	0.01206
-20.9301	108.339	-21.2099	218.239	-12.0443	0.28176	-11.9683	0.08684	-12.0443	0.000159785	-20.8358	0.000142505	-20.9301	108.285	-21.2099	218.144	-20.6867	0.00352	-21.0008	0.00996	-20.6756	0.00366	-21.0008	0.01088		-21.1341	96.7847	-21.1857	213.786	-11.5313	0.87844	-12.1831	0.10172	-12.2607	0.000325807	-20.8129	0.000145409	-21.1341	96.7434	-21.1857	213.692	-20.9021	0.00272	-20.9883	0.01203	-20.9021	0.00335	-20.9773	0.01086
-20.9191	103.175	-21.1989	207.956	-12.0332	0.30367	-11.9573	0.09782	-12.0332	0.000193134	-20.8248	0.000122504	-20.9191	103.124	-21.1989	207.866	-20.6756	0.00313	-20.9898	0.00893	-20.6645	0.00324	-20.9898	0.00977		-21.1231	91.5271	-21.1747	203.515	-11.5203	0.89048	-12.1722	0.11263	-12.2496	0.000387494	-20.8019	0.000125187	-21.1231	91.4881	-21.1747	203.426	-20.891	0.00241	-20.9773	0.01082	-20.891	0.00296	-20.9664	0.00975
-20.908	97.9597	-21.1879	197.562	-12.0221	0.32654	-11.9463	0.10992	-12.0221	0.000235223	-20.8138	0.000104993	-20.908	97.912	-21.1879	197.477	-20.6645	0.00276	-20.9788	0.00798	-20.6535	0.00286	-20.9788	0.00875		-21.112	86.2918	-21.1638	193.158	-11.5092	0.90145	-12.1612	0.12443	-12.2386	0.00045967	-20.7909	0.000107455	-21.112	86.2551	-21.1638	193.074	-20.88	0.00212	-20.9664	0.00971	-20.88	0.00262	-20.9554	0.00873
-20.8969	92.7267	-21.1769	187.122	-12.0111	0.35032	-11.9353	0.12321	-12.0111	0.000282888	-20.8028	8.97138e-05	-20.8969	92.6816	-21.1769	187.041	-20.6535	0.00244	-20.9678	0.00712	-20.6424	0.00252	-20.9678	0.00781		-21.101	81.1083	-21.1528	182.78	-11.4982	0.91138	-12.1502	0.13715	-12.2275	0.000543885	-20.78	9.1958e-05	-21.101	81.0739	-21.1528	182.701	-20.8689	0.00186	-20.9554	0.00869	-20.8689	0.0023	-20.9444	0.00779
-20.8859	87.5075	-21.1659	176.701	-12	0.37498	-11.9243	0.13776	-12	0.000339255	-12.2874	0.000103257	-20.8859	87.465	-21.1659	176.625	-20.6424	0.00214	-20.9568	0.00632	-20.6314	0.00221	-20.9568	0.00695		-21.0899	76.0042	-21.1418	172.443	-11.4871	0.92031	-12.1393	0.15085	-12.2165	0.000641872	-12.523	0.000106024	-21.0899	75.9721	-21.1418	172.368	-20.8579	0.00163	-20.9444	0.00774	-20.8579	0.00202	-20.9335	0.00693
-20.8748	82.332	-21.1549	166.357	-11.9889	0.40047	-11.9133	0.15365	-11.9889	0.000405713	-12.2764	0.000126065	-20.8748	82.2922	-21.1549	166.286	-20.6314	0.00188	-20.9458	0.0056	-20.6203	0.00194	-20.9458	0.00617		-21.0789	71.0046	-21.1308	162.204	-11.4761	0.92828	-12.1283	0.16555	-12.2054	0.000755566	-12.5121	0.000128045	-21.0789	70.9747	-21.1308	162.134	-20.8468	0.00143	-20.9335	0.00689	-20.8468	0.00177	-20.9225	0.00615
-20.8637	77.2282	-21.1439	156.148	-11.9779	0.42674	-11.9023	0.17096	-11.9779	0.000483833	-12.2654	0.000153488	-20.8637	77.1909	-21.1439	156.081	-20.6203	0.00164	-20.9348	0.00495	-20.6092	0.00169	-20.9348	0.00546		-21.0678	66.132	-21.1199	152.117	-11.465	0.93534	-12.1173	0.18128	-12.1944	0.000887114	-12.5011	0.000154254	-21.0678	66.1042	-21.1199	152.051	-20.8358	0.00124	-20.9225	0.0061	-20.8358	0.00154	-20.9115	0.00544
-20.8527	72.2214	-21.1329	146.124	-11.9668	0.45372	-11.8913	0.18975	-11.9668	0.00057539	-12.2544	0.000186362	-20.8527	72.1867	-21.1329	146.062	-20.6092	0.00143	-20.9238	0.00436	-20.5982	0.00147	-20.9238	0.00481		-21.0568	61.4064	-21.1089	142.231	-11.454	0.94154	-12.1064	0.19809	-12.1833	0.00104	-12.4901	0.000185366	-21.0568	61.3806	-21.1089	142.169	-20.8247	0.00108	-20.9115	0.00539	-20.8247	0.00134	-20.9006	0.00479
-20.8416	67.3348	-21.1219	136.333	-11.9557	0.48135	-11.8803	0.2101	-11.9557	0.000682374	-12.2434	0.000230063	-20.8416	67.3025	-21.1219	136.275	-20.5982	0.00124	-20.9128	0.00383	-20.5871	0.00128	-20.9128	0.00423		-21.0457	56.8449	-21.098	132.59	-11.4429	0.94694	-12.0954	0.21598	-12.1723	0.00121	-12.4792	0.000222201	-21.0457	56.8211	-21.098	132.532	-20.8137	0.000931757	-20.9006	0.00475	-20.8137	0.00116	-20.8896	0.00422
-20.8305	62.5887	-21.1109	126.814	-11.9447	0.50954	-11.8693	0.23207	-11.9447	0.000807015	-12.2324	0.000280127	-20.8305	62.5588	-21.1109	126.76	-20.5871	0.00107	-20.9018	0.00335	-20.576	0.0011	-20.9018	0.00371		-21.0347	52.4622	-21.087	123.232	-11.4319	0.95213	-12.0844	0.235	-12.1612	0.00141	-12.4682	0.000265696	-21.0347	52.4403	-21.087	123.179	-20.8026	0.000803721	-20.8896	0.00418	-20.8026	0.001	-20.8787	0.0037
-20.8195	58.0011	-21.0999	117.605	-11.9336	0.53822	-11.8583	0.25574	-11.9336	0.000951798	-12.2214	0.000337921	-20.8195	57.9734	-21.0999	117.555	-20.576	0.000926256	-20.8908	0.00292	-20.565	0.000952746	-20.8908	0.00324		-21.0236	48.27	-21.076	114.193	-11.4208	0.95716	-12.0735	0.25515	-12.1502	0.00164	-12.4573	0.00031692	-21.0236	48.2499	-21.076	114.144	-20.7916	0.000691167	-20.8787	0.00366	-20.7916	0.000864072	-20.8677	0.00323
-20.8084	53.587	-21.0889	108.737	-11.9225	0.5673	-11.8473	0.28114	-11.9225	0.00112	-12.2104	0.000406566	-20.8084	53.5615	-21.0889	108.691	-20.565	0.000796933	-20.8798	0.00254	-20.5539	0.000819033	-20.8798	0.00283		-21.0126	44.2777	-21.0651	105.501	-11.4098	0.96157	-12.0625	0.27645	-12.1391	0.0019	-12.4463	0.000380577	-21.0126	44.2593	-21.0651	105.455	-20.7805	0.000592564	-20.8677	0.00319	-20.7805	0.00074206	-20.8567	0.00281
-20.7973	49.359	-21.0779	100.234	-11.9115	0.59668	-11.8363	0.30833	-11.9115	0.00131	-12.1994	0.000487871	-20.7973	49.3356	-21.0779	100.192	-20.5539	0.000683582	-20.8688	0.00221	-20.5428	0.00070195	-20.8688	0.00245		-21.0015	40.492	-21.0541	97.1784	-11.3987	0.9654	-12.0515	0.2989	-12.128	0.0022	-12.4353	0.000452043	-21.0015	40.4752	-21.0541	97.1366	-20.7695	0.00050648	-20.8567	0.00278	-20.7695	0.000635337	-20.8458	0.00244
-20.7863	45.3269	-21.0668	92.1189	-11.9004	0.62627	-11.8253	0.33736	-11.9004	0.00154	-12.1884	0.000583904	-20.7863	45.3054	-21.0668	92.0802	-20.5428	0.000584573	-20.8578	0.00191	-20.5318	0.000599781	-20.8578	0.00213		-20.9905	36.9173	-21.0431	89.2451	-11.3877	0.9687	-12.0406	0.32251	-12.117	0.00254	-12.4244	0.000535636	-20.9905	36.902	-21.0431	89.2068	-20.7584	0.000431583	-20.8458	0.00241	-20.7584	0.000542307	-20.8348	0.00212
-20.7752	41.4982	-21.0558	84.4057	-11.8893	0.65596	-11.8143	0.36827	-11.8893	0.00179	-12.1774	0.000697015	-20.7752	41.4786	-21.0558	84.3703	-20.5318	0.000498385	-20.8468	0.00165	-20.5207	0.000510929	-20.8468	0.00184		-20.9794	33.5557	-21.0322	81.7145	-11.3766	0.97153	-12.0296	0.34727	-12.1059	0.00293	-12.4134	0.00063316	-20.9794	33.5418	-21.0322	81.6795	-20.7474	0.000366642	-20.8348	0.00209	-20.7474	0.00046149	-20.8238	0.00183
-20.7641	37.8778	-21.0449	77.1055	-11.8783	0.68565	-11.8033	0.40107	-11.8783	0.00208	-12.1664	0.000829874	-20.7641	37.86	-21.0449	77.0733	-20.5207	0.000423614	-20.8358	0.00142	-20.5096	0.00043392	-20.8358	0.00158		-20.9684	30.4074	-21.0212	74.5956	-11.3656	0.97392	-12.0186	0.37317	-12.0949	0.00336	-12.4024	0.000746647	-20.9684	30.3949	-21.0212	74.5637	-20.7363	0.000310523	-20.8238	0.0018	-20.7363	0.000391522	-20.8129	0.00157
-20.7531	34.4687	-21.0339	70.2248	-11.8672	0.71522	-11.7923	0.4358	-11.8672	0.00242	-12.1554	0.000985496	-20.7531	34.4525	-21.0339	70.1954	-20.5096	0.000358967	-20.8248	0.00121	-20.4986	0.0003674	-20.8248	0.00136		-20.9573	27.4707	-21.0102	67.8934	-11.3545	0.97592	-12.0077	0.40021	-12.0838	0.00384	-12.3915	0.000878368	-20.9573	27.4594	-21.0102	67.8644	-20.7253	0.000262193	-20.8129	0.00155	-20.7253	0.00033115	-20.8019	0.00135
-20.742	31.2714	-21.0228	63.7655	-11.8561	0.74457	-11.7813	0.47244	-11.8561	0.00281	-12.1444	0.00117	-20.742	31.2568	-21.0228	63.739	-20.4986	0.000303261	-20.8138	0.00104	-20.4875	0.000310135	-20.8138	0.00116		-20.9463	24.742	-20.9993	61.6086	-11.3435	0.97755	-11.9967	0.42835	-12.0728	0.00439	-12.3805	0.00103	-20.9463	24.7319	-20.9993	61.5823	-20.7142	0.00022071	-20.8019	0.00133	-20.7142	0.000279236	-20.7909	0.00116
-20.7309	28.2848	-21.0118	57.7262	-11.8451	0.77359	-11.7703	0.51102	-11.8451	0.00324	-12.1334	0.00138	-20.7309	28.2716	-21.0118	57.7022	-20.4875	0.000255422	-20.8028	0.00088323	-20.4764	0.000261002	-20.8028	0.000990843		-20.9352	22.2166	-20.9883	55.7385	-11.3324	0.97884	-11.9857	0.45757	-12.0617	0.005	-12.3695	0.00121	-20.9352	22.2075	-20.9883	55.7148	-20.7032	0.000185225	-20.7909	0.00114	-20.7032	0.000234743	-20.78	0.000986757
-20.7199	25.506	-21.0008	52.1015	-11.834	0.80258	-11.7593	0.55149	-11.834	0.00373	-12.1224	0.00163	-20.7199	25.4941	-21.0008	52.0799	-20.4764	0.000214476	-20.7918	0.000750211	-20.4654	0.000218986	-20.7918	0.000842862		-20.9242	19.8883	-20.9773	50.2769	-11.3214	0.9798	-11.9748	0.48783	-12.0507	0.00568	-12.3586	0.00141	-20.9242	19.8802	-20.9773	50.2555	-20.6921	0.000154971	-20.78	0.000969309	-20.6921	0.000196739	-20.769	0.000839437
-20.7088	22.9305	-20.9898	46.8834	-11.823	0.83144	-11.7483	0.59384	-11.823	0.00429	-12.1114	0.00192	-20.7088	22.9199	-20.9898	46.864	-20.4654	0.000179546	-20.7808	0.000635306	-20.4543	0.000183178	-20.7808	0.000714823		-20.9131	17.7497	-20.9664	45.2149	-11.3103	0.98046	-11.9638	0.51908	-12.0396	0.00644	-12.3476	0.00164	-20.9131	17.7425	-20.9664	45.1958	-20.6811	0.000129264	-20.769	0.000823923	-20.6811	0.000164385	-20.758	0.000711976
-20.6977	20.5527	-20.9788	42.0609	-11.8119	0.85964	-11.7373	0.63802	-11.8119	0.00491	-12.1004	0.00225	-20.6977	20.5432	-20.9788	42.0436	-20.4543	0.000149849	-20.7698	0.00053638	-20.4432	0.00015276	-20.7698	0.000604409		-20.9021	15.793	-20.9554	40.541	-11.2993	0.98081	-11.9528	0.55128	-12.0286	0.00728	-12.3366	0.00191	-20.9021	15.7866	-20.9554	40.5239	-20.67	0.000107493	-20.758	0.000698248	-20.67	0.000136934	-20.7471	0.000602061
-20.6867	18.3657	-20.9678	37.6209	-11.8008	0.88706	-11.7263	0.68399	-11.8008	0.00561	-12.0894	0.00264	-20.6867	18.3572	-20.9678	37.6055	-20.4432	0.000124684	-20.7588	0.000451494	-20.4322	0.000127007	-20.7588	0.000509511		-20.891	14.0092	-20.9444	36.2416	-11.2882	0.98085	-11.9419	0.58437	-12.0175	0.00821	-12.3257	0.00221	-20.891	14.0035	-20.9444	36.2263	-20.659	8.91161e-05	-20.7471	0.000589974	-20.659	0.00011372	-20.7361	0.000507593
-20.6756	16.3617	-20.9568	33.5483	-11.7897	0.91359	-11.7153	0.73167	-11.7897	0.00639	-12.0784	0.00308	-20.6756	16.3542	-20.9568	33.5346	-20.4322	0.00010343	-20.7478	0.000378897	-20.4211	0.000105275	-20.7478	0.00042822		-20.88	12.389	-20.9335	32.3013	-11.2772	0.98058	-11.9309	0.61829	-12.0065	0.00924	-12.3147	0.00257	-20.88	12.384	-20.9335	32.2877	-12.5038	0.000116387	-20.7361	0.000496998	-20.6479	9.41541e-05	-20.7251	0.000426667
-20.6645	14.5323	-20.9458	29.8266	-11.7787	0.93914	-11.7043	0.781	-11.7787	0.00727	-12.0674	0.00358	-20.6645	14.5256	-20.9458	29.8144	-20.4211	8.55378e-05	-20.7368	0.000317015	-20.41	8.69972e-05	-20.7368	0.000358815		-20.8689	10.9229	-20.9225	28.7034	-11.2661	0.97999	-11.92	0.65297	-11.9954	0.01037	-12.3037	0.00296	-20.8689	10.9185	-20.9225	28.6913	-12.4927	0.000144778	-20.7251	0.000417423	-12.3159	0.000101602	-20.7142	0.00035757
-20.6535	12.8683	-20.9348	26.4379	-11.7676	0.96363	-11.6933	0.83187	-11.7676	0.00824	-12.0564	0.00416	-20.6535	12.8624	-20.9348	26.4271	-12.2213	0.000111348	-20.7258	0.000264441	-12.0332	0.000104127	-20.7258	0.000299753		-20.8579	9.60097	-20.9115	25.4299	-11.2551	0.97906	-11.909	0.68834	-11.9844	0.0116	-12.2928	0.00342	-20.8579	9.59712	-20.9115	25.4192	-12.4817	0.000224453	-20.7142	0.00034954	-12.3049	0.000121681	-20.7032	0.000298767
-20.6424	11.3603	-20.9238	23.3637	-11.7566	0.98695	-11.6823	0.88417	-11.7566	0.00932	-12.0454	0.00482	-20.6424	11.3552	-20.9238	23.3542	-12.2103	0.000140731	-20.7148	0.000219922	-12.0221	0.000126288	-20.7148	0.00024966		-20.8468	8.41335	-20.9006	22.4624	-11.244	0.97778	-11.898	0.72449	-11.9733	0.01296	-12.2818	0.00393	-20.8468	8.40998	-20.9006	22.453	-12.4706	0.000279576	-20.7032	0.000291821	-12.2938	0.00014534	-20.6922	0.000248887
-20.6314	9.99873	-20.9128	20.5848	-11.7455	1.00905	-11.6713	0.93779	-11.7455	0.01052	-12.0344	0.00557	-20.6314	9.99419	-20.9128	20.5765	-12.1992	0.000177324	-20.7038	0.000182346	-12.0111	0.0001518	-20.7038	0.000207312		-20.8358	7.3502	-20.8896	19.7819	-11.233	0.97611	-11.8871	0.76133	-11.9623	0.01443	-12.2708	0.0045	-20.8358	7.34727	-20.8896	19.7736	-12.4596	0.000347251	-20.6922	0.000242904	-12.2828	0.000173139	-20.6813	0.000206714
-20.6203	8.77368	-20.9018	18.0819	-11.7344	1.02986	-11.6603	0.9926	-11.7344	0.01184	-12.0234	0.00642	-20.6203	8.7697	-20.9018	18.0745	-12.1881	0.00022275	-20.6928	0.000150736	-12	0.000181948	-20.6928	0.000171628		-20.8247	6.40186	-20.8787	17.3692	-11.2219	0.97403	-11.8761	0.79861	-11.9512	0.01604	-12.2599	0.00515	-20.8247	6.39931	-20.8787	17.362	-12.4485	0.00043009	-20.6813	0.000201583	-12.2717	0.000205708	-20.6703	0.000171174
-20.6092	7.67541	-20.8908	15.8355	-11.7233	1.04932	-11.6493	1.04846	-11.7233	0.0133	-12.0123	0.00738	-20.6092	7.67194	-20.8908	15.8291	-12.177	0.000278956	-20.6818	0.00012423	-11.9889	0.000217466	-20.6818	0.000141659		-20.8137	5.5589	-20.8677	15.2052	-11.2109	0.97154	-11.8651	0.83625	-11.9402	0.01778	-12.2489	0.00588	-20.8137	5.55669	-20.8677	15.1988	-12.4375	0.000531188	-20.6703	0.000166791	-12.2607	0.000243758	-20.6593	0.00014132
-20.5982	6.69429	-20.8798	13.8264	-11.7123	1.06739	-11.6383	1.10522	-11.7123	0.01489	-12.0014	0.00847	-20.5982	6.69127	-20.8798	13.8208	-12.166	0.000348278	-20.6708	0.000102076	-11.9779	0.000259183	-20.6708	0.000116571		-20.8026	4.81225	-20.8567	13.2709	-11.1998	0.96898	-11.8542	0.87413	-11.9291	0.01966	-12.2379	0.0067	-20.8026	4.81034	-20.8567	13.2654	-12.4264	0.000654203	-20.6593	0.00013759	-12.2496	0.000288085	-20.6484	0.000116324
-20.5871	5.8209	-20.8688	12.0359	-11.7012	1.08404	-11.6273	1.16272	-11.7012	0.01664	-11.9903	0.0097	-20.5871	5.81828	-20.8688	12.0311	-12.1549	0.000433497	-20.6598	8.36205e-05	-11.9668	0.000308034	-20.6598	9.56376e-05		-20.7916	4.15321	-20.8458	11.5481	-11.1888	0.96635	-11.8432	0.91217	-11.9181	0.02169	-12.227	0.00761	-20.7916	4.15157	-20.8458	11.5434	-12.4154	0.000803443	-20.6484	0.000113163	-12.2386	0.000339579	-20.6374	9.54627e-05
-20.576	5.04613	-20.8578	10.4457	-11.6902	1.09925	-11.6163	1.22078	-11.6902	0.01855	-11.9794	0.01108	-20.576	5.04387	-20.8578	10.4415	-12.1439	0.000537919	-12.4414	0.000125568	-11.9557	0.000365067	-12.2434	0.000102861		-20.7805	3.57352	-20.8348	10.019	-11.1777	0.96322	-11.8322	0.95028	-11.907	0.02386	-12.216	0.00863	-20.7805	3.57211	-20.8348	10.0148	-12.4043	0.000983959	-20.6374	9.27939e-05	-12.2275	0.000399228	-12.4682	0.000101294
-20.565	4.36124	-20.8468	9.03835	-11.6791	1.11302	-11.6053	1.27924	-11.6791	0.02064	-11.9683	0.01262	-20.565	4.3593	-20.8468	9.03474	-12.1328	0.000665454	-12.4304	0.000158276	-11.9447	0.00043145	-12.2324	0.000124764		-20.7695	3.06538	-20.8238	8.66629	-11.1667	0.95958	-11.8213	0.98834	-11.896	0.0262	-12.205	0.00976	-20.7695	3.06418	-20.8238	8.66271	-12.3933	0.0012	-12.7095	0.000106399	-12.2165	0.000468129	-12.4573	0.000120466
-20.5539	3.7579	-20.8358	7.79707	-11.668	1.12609	-11.5943	1.33792	-11.668	0.0229	-11.9573	0.01434	-20.5539	3.75622	-20.8358	7.79396	-12.1217	0.000820711	-12.4194	0.0001989	-11.9336	0.000508484	-12.2214	0.000150305		-20.7584	2.6215	-20.8129	7.47383	-11.1556	0.95541	-11.8103	1.02629	-11.8849	0.02869	-12.1941	0.01101	-20.7584	2.62047	-20.8129	7.47075	-12.3822	0.00146	-12.6985	0.000132308	-12.2054	0.000547489	-12.4463	0.000144284
-20.5428	3.22821	-20.8248	6.70601	-11.657	1.1385	-11.5833	1.39707	-11.657	0.02535	-11.9463	0.01626	-20.5428	3.22678	-20.8248	6.70334	-12.1107	0.00108	-12.4084	0.000249196	-11.9225	0.000597611	-12.2104	0.000180592		-20.7474	2.23507	-20.8019	6.42618	-11.1446	0.9507	-11.7993	1.064	-11.8739	0.03135	-12.1831	0.0124	-20.7474	2.2342	-20.8019	6.42353	-12.3712	0.00178	-12.6875	0.000164031	-12.1944	0.000638639	-12.4353	0.000170884
-20.5318	2.76479	-20.8138	5.75027	-11.6459	1.14948	-11.5723	1.45651	-11.6459	0.028	-11.9353	0.01839	-20.5318	2.76357	-20.8138	5.74798	-12.0996	0.00132	-12.3974	0.000311267	-11.9115	0.000700418	-12.1994	0.000216406		-20.7363	1.89981	-20.7909	5.50886	-11.1335	0.94547	-11.7884	1.10141	-11.8628	0.03418	-12.1722	0.01394	-20.7363	1.89906	-20.7909	5.5066	-12.3601	0.00215	-12.6766	0.000243847	-12.1833	0.000743031	-12.4244	0.000201903
-20.5207	2.36073	-20.8028	4.9159	-11.6348	1.15906	-11.5613	1.51559	-11.6348	0.03086	-11.9243	0.02076	-20.5207	2.35969	-20.8028	4.91395	-12.0885	0.00162	-12.3864	0.000416773	-11.9004	0.000818652	-12.1884	0.000258635		-20.7253	1.60992	-20.78	4.70837	-11.1225	0.9397	-11.7774	1.13841	-11.8518	0.03717	-12.1612	0.01563	-20.7253	1.60929	-20.78	4.70644	-12.3491	0.00264	-12.6656	0.000302521	-12.1723	0.000862252	-12.4134	0.000237985
-20.5096	2.00961	-20.7918	4.18994	-11.6238	1.16727	-11.5503	1.57413	-11.6238	0.03393	-11.9133	0.02338	-20.5096	2.00873	-20.7918	4.18829	-12.0775	0.00198	-12.3754	0.000518668	-11.8893	0.000954222	-12.1774	0.000308289		-20.7142	1.36011	-20.769	4.01217	-11.1114	0.93343	-11.7664	1.17493	-11.8407	0.04034	-12.1502	0.01749	-20.7142	1.35958	-20.769	4.01053	-12.338	0.00319	-12.6546	0.000374268	-12.1612	0.000998019	-12.4024	0.000279849
-20.4986	1.70554	-20.7808	3.56045	-11.6127	1.17414	-11.5393	1.63194	-11.6127	0.03722	-11.9023	0.02626	-20.4986	1.70479	-20.7808	3.55905	-12.0664	0.00242	-12.3644	0.00070336	-11.8783	0.00111	-12.1664	0.000366509		-20.7032	1.14557	-20.758	3.4087	-11.1004	0.92667	-11.7555	1.21148	-11.8297	0.04367	-12.1393	0.01953	-20.7032	1.14512	-20.758	3.4073	-12.327	0.00383	-12.6437	0.000461746	-12.1502	0.00115	-12.3915	0.000328298
-20.4875	1.44309	-20.7698	3.01642	-11.6016	1.17975	-11.5283	1.68882	-11.6016	0.04075	-11.8913	0.02944	-20.4875	1.44246	-20.7698	3.01524	-12.0553	0.00293	-12.3534	0.000872947	-11.8672	0.00129	-12.1554	0.00043458		-20.6921	0.96193	-20.7471	2.88733	-11.0893	0.92017	-11.7445	1.24799	-11.8186	0.04717	-12.1283	0.02175	-20.6921	0.96156	-20.7471	2.88615	-12.3159	0.0046	-12.6327	0.000568091	-12.1391	0.00133	-12.3805	0.000384228
-20.4764	1.21733	-20.7588	2.54783	-11.5906	1.18413	-11.5173	1.74459	-11.5906	0.0445	-11.8803	0.03292	-20.4764	1.2168	-20.7588	2.54683	-12.0443	0.00356	-12.3424	0.00108	-11.8561	0.00149	-12.1444	0.000514655		-20.6811	0.80527	-20.7361	2.4384	-11.0783	0.91396	-11.7335	1.28378	-11.8076	0.05084	-12.1173	0.02418	-20.6811	0.80496	-20.7361	2.4374	-12.3049	0.0055	-12.6217	0.000696995	-12.128	0.00152	-12.3695	0.000448629
-20.4654	1.02377	-20.7478	2.14556	-11.5795	1.18769	-11.5063	1.79909	-11.5795	0.0485	-11.8693	0.03674	-20.4654	1.02333	-20.7478	2.14472	-12.0332	0.0043	-12.3314	0.00133	-11.8451	0.00172	-12.1334	0.000607133		-20.67	0.67208	-20.7251	2.05311	-11.0672	0.90736	-11.7226	1.31877	-11.7965	0.05468	-12.1064	0.02682	-20.67	0.67182	-20.7251	2.05227	-12.2938	0.00656	-12.6108	0.000852788	-12.117	0.00175	-12.3586	0.000522599
-20.4543	0.85839	-20.7368	1.80136	-11.5684	1.1905	-11.4953	1.85215	-11.5684	0.05275	-11.8583	0.04091	-20.4543	0.85802	-20.7368	1.80066	-12.0221	0.00521	-12.3204	0.00164	-11.834	0.00197	-12.1224	0.000714374		-20.659	0.55921	-20.7142	1.72353	-11.0562	0.90041	-11.7116	1.35289	-11.7855	0.05867	-12.0954	0.02969	-20.659	0.55899	-20.7142	1.72283	-12.2828	0.0078	-12.5998	0.00104	-12.1059	0.002	-12.3476	0.000607346
-20.4432	0.71754	-20.7258	1.50783	-11.5574	1.1923	-11.4843	1.90363	-11.5574	0.05724	-11.8473	0.04545	-20.4432	0.71723	-20.7258	1.50724	-12.0111	0.00626	-12.3094	0.00201	-11.823	0.00227	-12.1114	0.000838388		-20.6479	0.46387	-20.7032	1.44253	-11.0451	0.89315	-11.7006	1.38608	-11.7744	0.06282	-12.0844	0.0328	-20.6479	0.4637	-20.7032	1.44195	-12.2717	0.00926	-12.5888	0.00127	-12.0949	0.00228	-12.3366	0.000704196
-20.4322	0.59799	-20.7148	1.25833	-11.5463	1.19318	-11.4733	1.95336	-11.5463	0.06199	-11.8363	0.05039	-20.4322	0.59773	-20.7148	1.25784	-12	0.0075	-12.2984	0.00246	-11.8119	0.00259	-12.1004	0.000982613		-20.6369	0.38362	-20.6922	1.20374	-11.0341	0.88565	-11.6897	1.4183	-11.7634	0.06713	-12.0735	0.03615	-20.6369	0.38348	-20.6922	1.20325	-12.2607	0.01095	-12.5779	0.00155	-12.0838	0.00259	-12.3257	0.000814599
-20.4211	0.49684	-20.7038	1.04695	-11.5352	1.19321	-11.4623	2.00163	-11.5352	0.06699	-11.8253	0.05574	-20.4211	0.49663	-20.7038	1.04655	-11.9889	0.00896	-12.2874	0.00301	-11.8008	0.00296	-12.0894	0.00115		-20.6258	0.31629	-20.6813	1.00147	-11.023	0.87795	-11.6787	1.44949	-11.7523	0.07158	-12.0625	0.03977	-20.6258	0.31617	-20.6813	1.00107	-12.2496	0.01292	-12.5669	0.00187	-12.0728	0.00293	-12.3147	0.000941542
-20.41	0.41156	-20.6928	0.86846	-11.5242	1.19248	-11.4513	2.04832	-11.5242	0.07224	-11.8143	0.06153	-20.41	0.41138	-20.6928	0.86812	-11.9779	0.01067	-12.2764	0.00366	-11.7897	0.00336	-12.0784	0.00134		-20.6148	0.25998	-20.6703	0.8307	-11.012	0.8701	-11.6677	1.47961	-11.7413	0.07618	-12.0515	0.04366	-20.6148	0.25988	-20.6703	0.83037	-12.2386	0.01521	-12.5559	0.00226	-12.0617	0.00332	-12.3037	0.00108
-20.399	0.33988	-20.6818	0.71823	-11.5131	1.19106	-11.4403	2.09372	-11.5131	0.07775	-11.8033	0.06777	-20.399	0.33973	-20.6818	0.71795	-11.9668	0.01268	-12.2654	0.00444	-11.7787	0.00382	-12.0674	0.00155		-20.6037	0.21305	-20.6593	0.68699	-11.0009	0.86218	-11.6568	1.50879	-11.7302	0.08091	-12.0406	0.04783	-20.6037	0.21297	-20.6593	0.68671	-12.2275	0.01785	-12.545	0.00272	-12.0507	0.00375	-12.2928	0.00125
-20.3879	0.27983	-20.6708	0.5922	-11.502	1.18905	-11.4293	2.13774	-11.502	0.08352	-11.7923	0.07449	-20.3879	0.27972	-20.6708	0.59197	-11.9557	0.01502	-12.2544	0.00537	-11.7676	0.00432	-12.0564	0.0018		-20.5927	0.17406	-20.6484	0.56644	-10.9899	0.85424	-11.6458	1.537	-11.7192	0.08576	-12.0296	0.0523	-20.5927	0.17399	-20.6484	0.56622	-12.2165	0.0209	-12.534	0.00331	-12.0396	0.00422	-12.2818	0.00143
-20.3768	0.2297	-20.6598	0.48682	-11.491	1.18653	-11.4183	2.17947	-11.491	0.08952	-11.7813	0.0817	-20.3768	0.2296	-20.6598	0.48663	-11.9447	0.01774	-12.2434	0.00654	-11.7566	0.00488	-12.0454	0.00208		-20.5816	0.14177	-20.6374	0.46565	-10.9788	0.84633	-11.6349	1.56407	-11.7081	0.09074	-12.0186	0.05707	-20.5816	0.14171	-20.6374	0.46547	-12.2054	0.0244	-12.523	0.00397	-12.0286	0.00474	-12.2708	0.00164
-20.3658	0.18798	-20.6488	0.39898	-11.4799	1.18356	-11.4072	2.21882	-11.4799	0.09578	-11.7703	0.08944	-20.3658	0.1879	-20.6488	0.39883	-11.9336	0.0209	-12.2324	0.0079	-11.7455	0.0055	-12.0344	0.0024		-20.5706	0.11512	-20.6264	0.38165	-10.9678	0.83852	-11.6239	1.58997	-11.6971	0.09583	-12.0077	0.06216	-20.5706	0.11507	-20.6264	0.3815	-12.1944	0.02842	-12.5121	0.00474	-12.0175	0.0053	-12.2599	0.00187
-20.3547	0.15336	-20.6378	0.32601	-11.4688	1.18023	-11.3963	2.25573	-11.4688	0.10226	-11.7593	0.09769	-20.3547	0.1533	-20.6378	0.32589	-11.9225	0.02456	-12.2214	0.00949	-11.7344	0.00618	-12.0234	0.00276		-20.5595	0.09319	-20.6155	0.31187	-10.9567	0.83086	-11.6129	1.61526	-11.686	0.10105	-11.9967	0.06757	-20.5595	0.09316	-20.6155	0.31174	-12.1833	0.03301	-12.5011	0.00566	-12.0065	0.00593	-12.2489	0.00213
-20.3436	0.12475	-20.6268	0.26558	-11.4578	1.1766	-11.3852	2.29015	-11.4578	0.10898	-11.7483	0.1065	-20.3436	0.12469	-20.6268	0.26548	-11.9115	0.02877	-12.2104	0.01136	-11.7233	0.00693	-12.0123	0.00317		-20.5485	0.07521	-20.6045	0.25408	-10.9457	0.82341	-11.602	1.63993	-11.675	0.10636	-11.9857	0.07332	-20.5485	0.07519	-20.6045	0.25398	-12.1723	0.03824	-12.4901	0.00673	-11.9954	0.00661	-12.2379	0.00242
-20.3326	0.10116	-20.6158	0.2157	-11.4467	1.17274	-11.3742	2.32206	-11.4467	0.11591	-11.7373	0.11586	-20.3326	0.10112	-20.6158	0.21562	-11.9004	0.03361	-12.1994	0.01357	-11.7123	0.00774	-12.0014	0.00362		-20.5374	0.06052	-20.5936	0.20638	-10.9346	0.81619	-11.591	1.66341	-11.6639	0.11176	-11.9748	0.0794	-20.5374	0.0605	-20.5936	0.2063	-12.1612	0.04419	-12.4792	0.00798	-11.9844	0.00734	-12.227	0.00274
-20.3215	0.08179	-20.6048	0.17467	-11.4356	1.16871	-11.3633	2.35143	-11.4356	0.12306	-11.7263	0.12579	-20.3215	0.08175	-20.6048	0.1746	-11.8893	0.03915	-12.1884	0.01617	-11.7012	0.00863	-11.9903	0.00414		-20.5264	0.04855	-20.5826	0.16714	-10.9236	0.80925	-11.58	1.68571	-11.6529	0.11724	-11.9638	0.08582	-20.5264	0.04853	-20.5826	0.16707	-12.1502	0.05093	-12.4682	0.00944	-11.9733	0.00815	-12.216	0.0031
-20.3104	0.06592	-20.5938	0.14101	-11.4246	1.16512	-11.3522	2.37826	-11.4246	0.1304	-11.7153	0.13631	-20.3104	0.0659	-20.5938	0.14096	-11.8783	0.04549	-12.1774	0.0192	-11.6902	0.0096	-11.9794	0.00471		-20.5153	0.03882	-20.5716	0.13495	-10.9125	0.80263	-11.5691	1.70683	-11.6418	0.12281	-11.9528	0.0926	-20.5153	0.03881	-20.5716	0.1349	-12.1391	0.05855	-12.4573	0.01114	-11.9623	0.00901	-12.205	0.0035
-20.2994	0.05298	-20.5828	0.1135	-11.4135	1.16201	-11.3412	2.40257	-11.4135	0.13793	-11.7043	0.14742	-20.2994	0.05295	-20.5828	0.11345	-11.8672	0.05277	-12.1664	0.02275	-11.6791	0.01066	-11.9683	0.00536		-20.5043	0.03095	-20.5607	0.10864	-10.9015	0.79634	-11.5581	1.72677	-11.6308	0.12844	-11.9419	0.09973	-20.5043	0.03094	-20.5607	0.1086	-12.128	0.06713	-12.4463	0.01315	-11.9512	0.00995	-12.1941	0.00394
-20.2883	0.04244	-20.5718	0.09108	-11.4024	1.15884	-11.3302	2.42438	-11.4024	0.14562	-11.6933	0.15913	-20.2883	0.04242	-20.5718	0.09104	-11.8561	0.06098	-12.1554	0.02688	-11.668	0.0118	-11.9573	0.00607		-20.4932	0.0246	-20.5497	0.08719	-10.8904	0.79039	-11.5471	1.74554	-11.6197	0.13415	-11.9309	0.10722	-20.4932	0.0246	-20.5497	0.08716	-12.117	0.07682	-12.4353	0.01544	-11.9402	0.01095	-12.1831	0.00443
-20.2772	0.0339	-20.5608	0.07287	-11.3914	1.15562	-11.3192	2.44447	-11.3914	0.15348	-11.6823	0.17144	-20.2772	0.03389	-20.5608	0.07284	-11.8451	0.07029	-12.1444	0.0317	-11.657	0.01303	-11.9463	0.00687		-20.4822	0.0195	-20.5387	0.06977	-10.8794	0.7848	-11.5362	1.76314	-11.6087	0.13992	-11.92	0.11507	-20.4822	0.01949	-20.5387	0.06975	-12.1059	0.08764	-12.4244	0.01809	-11.9291	0.01203	-12.1722	0.00497
-20.2662	0.02699	-20.5498	0.05812	-11.3803	1.15238	-11.3082	2.46321	-11.3803	0.16147	-11.6713	0.18436	-20.2662	0.02698	-20.5498	0.0581	-11.834	0.08079	-12.1334	0.03726	-11.6459	0.01435	-11.9353	0.00774		-20.4711	0.0154	-20.5278	0.05567	-10.8683	0.77955	-11.5252	1.78014	-11.5976	0.14576	-11.909	0.12329	-20.4711	0.0154	-20.5278	0.05564	-12.0949	0.09972	-12.4134	0.02113	-11.9181	0.01318	-12.1612	0.00556
-20.2551	0.02143	-20.5388	0.04622	-11.3692	1.14909	-11.2972	2.47992	-11.3692	0.16958	-11.6603	0.19787	-20.2551	0.02142	-20.5388	0.0462	-11.823	0.09261	-12.1224	0.04368	-11.6348	0.01578	-11.9243	0.00872		-20.4601	0.01213	-20.5168	0.04428	-10.8573	0.77464	-11.5142	1.79654	-11.5866	0.15166	-11.898	0.13188	-20.4601	0.01213	-20.5168	0.04426	-12.0838	0.11319	-12.4024	0.02463	-11.907	0.0144	-12.1502	0.00621
-20.2441	0.01696	-20.5278	0.03664	-11.3582	1.14577	-11.2862	2.49431	-11.3582	0.17787	-11.6493	0.21199	-20.2441	0.01696	-20.5278	0.03663	-11.8119	0.10589	-12.1114	0.05107	-11.6238	0.0173	-11.9133	0.00978		-20.449	0.00953	-20.5058	0.03511	-10.8462	0.77005	-11.5033	1.8118	-11.5755	0.15762	-11.8871	0.14084	-20.449	0.00952	-20.5058	0.0351	-12.0728	0.12815	-12.3915	0.02863	-11.896	0.0157	-12.1393	0.00692
-20.233	0.01339	-20.5168	0.02897	-11.3471	1.1424	-11.2752	2.50644	-11.3471	0.18631	-11.6383	0.2267	-20.233	0.01338	-20.5168	0.02896	-11.8008	0.12075	-12.1004	0.05961	-11.6127	0.01892	-11.9023	0.01096		-20.438	0.00745	-20.4949	0.02776	-10.8352	0.76573	-11.4923	1.82592	-11.5645	0.16373	-11.8761	0.15017	-20.438	0.00744	-20.4949	0.02775	-12.0617	0.14471	-12.3805	0.03321	-11.8849	0.01708	-12.1283	0.0077
-20.2219	0.01043	-20.5058	0.02283	-11.3361	1.13895	-11.2642	2.51637	-11.3361	0.19482	-11.6273	0.242	-20.2219	0.01042	-20.5058	0.02282	-11.7897	0.13733	-12.0894	0.06933	-11.6016	0.02065	-11.8913	0.01225		-20.4269	0.00494	-20.4839	0.02189	-10.8241	0.76167	-11.4813	1.8389	-11.5534	0.16999	-11.8651	0.15987	-20.4269	0.00493	-20.4839	0.02188	-12.0507	0.16301	-12.3695	0.03842	-11.8739	0.01854	-12.1173	0.00854
-20.2109	0.00752	-20.4948	0.01794	-11.325	1.1354	-11.2532	2.52419	-11.325	0.20338	-11.6163	0.25788	-20.2109	0.00752	-20.4948	0.01793	-11.7787	0.15578	-12.0784	0.08043	-11.5906	0.02248	-11.8803	0.01365		-20.4159	0.0021	-20.4729	0.0172	-10.8131	0.75806	-11.4704	1.85076	-11.5424	0.17632	-11.8542	0.16992	-20.4159	0.0021	-20.4729	0.0172	-12.0396	0.18316	-12.3586	0.04433	-11.8628	0.02007	-12.1064	0.00946
-20.1998	0.00513	-20.4838	0.01387	-11.3139	1.13173	-11.2422	2.52996	-11.3139	0.21196	-11.6053	0.27432	-20.1998	0.00513	-20.4838	0.01386	-11.7676	0.17625	-12.0674	0.09306	-11.5795	0.02442	-11.8693	0.01518		-20.4048	0	-20.462	0.0127	-10.802	0.75485	-11.4594	1.86148	-11.5313	0.18272	-11.8432	0.18032	-20.4048	0	-20.462	0.0127	-12.0286	0.20529	-12.3476	0.05103	-11.8518	0.02168	-12.0954	0.01046
-20.1887	0.00345	-20.4728	0.00956	-11.3028	1.12789	-11.2312	2.53378	-11.3028	0.22056	-11.5943	0.2913	-20.1887	0.00345	-20.4728	0.00956	-11.7566	0.19889	-12.0564	0.1074	-11.5684	0.02647	-11.8583	0.01685		-12.5259	0.000102359	-20.451	0.00794	-10.7909	0.75173	-11.4484	1.87109	-11.5203	0.18919	-11.8322	0.19108	-11.7413	0.000106187	-20.451	0.00794	-12.0175	0.22952	-12.3366	0.05861	-11.8407	0.02336	-12.0844	0.01154
-20.1776	0.00176	-20.4617	0.00479	-11.2918	1.12384	-11.2202	2.53601	-11.2918	0.22914	-11.5833	0.30886	-20.1776	0.00176	-20.4617	0.00479	-11.7455	0.22387	-12.0454	0.12362	-11.5574	0.02863	-11.8473	0.01865		-12.5148	0.000128107	-20.44	0.00433	-10.7799	0.74863	-11.4375	1.87956	-11.5092	0.19574	-11.8213	0.20219	-11.7302	0.00011534	-20.44	0.00433	-12.0065	0.25607	-12.3257	0.06714	-11.8297	0.02511	-12.0735	0.0127
-20.1666	0.00102	-20.4507	0.00261	-11.2807	1.11956	-11.2092	2.53674	-11.2807	0.2377	-11.5723	0.32698	-20.1666	0.00102	-20.4507	0.00261	-11.7344	0.25135	-12.0344	0.14194	-11.5463	0.03089	-11.8363	0.0206		-12.5038	0.000159844	-20.4291	0.00104	-10.7688	0.7456	-11.4265	1.88692	-11.4982	0.20238	-11.8103	0.21364	-11.7192	0.000125025	-20.4291	0.00104	-11.9954	0.28488	-12.3147	0.07677	-11.8186	0.02693	-12.0625	0.01395
-20.1555	0	-20.4398	0	-11.2697	1.11498	-11.1982	2.53578	-11.2697	0.24621	-11.5613	0.34558	-20.1555	0	-20.4398	0	-11.7233	0.28148	-12.0234	0.16256	-11.5352	0.03325	-11.8253	0.02271		-12.4927	0.000198834	-20.4181	0	-10.7578	0.74258	-11.4155	1.89316	-11.4871	0.20909	-11.7993	0.22543	-11.7081	0.000135313	-20.4181	0	-11.9844	0.31616	-12.3037	0.08753	-11.8076	0.02882	-12.0515	0.0153
-12.2324	0.000118498	-12.4634	0.000103798	-11.2586	1.11007	-11.1872	2.53321	-11.2586	0.25467	-11.5503	0.36464	-11.6459	0.000100721	-11.8693	0.000110233	-11.7123	0.31444	-12.0123	0.18575	-11.5242	0.03572	-11.8143	0.02497		-12.4817	0.000307518	-12.7204	0.000115999	-10.7467	0.73937	-11.4046	1.89829	-11.4761	0.2159	-11.7884	0.23755	-11.6971	0.00014623	-11.9528	0.00010689	-11.9733	0.35002	-12.2928	0.09958	-11.7965	0.03077	-12.0406	0.01674
-12.2213	0.000150227	-12.4524	0.00013163	-11.2475	1.10478	-11.1762	2.52971	-11.2475	0.26305	-11.5393	0.38413	-11.6348	0.00011334	-11.8583	0.000124576	-11.7012	0.35038	-12.0014	0.21167	-11.5131	0.03828	-11.8033	0.02739		-12.4706	0.000383014	-12.7095	0.00014468	-10.7357	0.73589	-11.3936	1.9028	-11.465	0.2228	-11.7774	0.25	-11.686	0.000157835	-11.9419	0.00011618	-11.9623	0.38654	-12.2818	0.11303	-11.7855	0.03278	-12.0296	0.01828
-12.2103	0.00018987	-12.4414	0.000166419	-11.2365	1.09908	-11.1652	2.52537	-11.2365	0.27135	-11.5283	0.40402	-11.6238	0.000127187	-11.8473	0.000140369	-11.6902	0.38945	-11.9903	0.24059	-11.502	0.04095	-11.7923	0.02999		-12.4596	0.000475693	-12.6985	0.00017991	-10.7246	0.73206	-11.3826	1.90668	-11.454	0.2298	-11.7664	0.26277	-11.675	0.000170102	-11.9309	0.000126074	-11.9512	0.42585	-12.2708	0.12797	-11.7744	0.03484	-12.0186	0.01993
[truncated: 2,982 more rows]
[truncated: 64 more columns]

## Sheet: Sheet3
Optical Properties
[truncated: 2,004 more rows]
[truncated: 331 more columns]

[truncated: 2 more sheets: Sheet4, Sheet5]
